# Supplementary material for: Evidence available for patient-identified priorities in depression research: results of 11 rapid responses
Source: PubMed Central journal article supplement — BMJ Open. 2019 Jun 28;9(6):e026847. doi: 10.1136/bmjopen-2018-026847 (PMC6609077; doi:10.1136/bmjopen-2018-026847), 2019-06-28
Supplement: bmjopen-2018-026847.draft_revisions.pdf [file bmjopen-2018-026847.draft_revisions.pdf]

# BMJ Open

BMJ Open is committed to open peer review. As part of this commitment we make the peer review history of every article we publish publicly available.

When an article is published we post the peer reviewers' comments and the authors' responses online. We also post the versions of the paper that were used during peer review. These are the versions that the peer review comments apply to.

The versions of the paper that follow are the versions that were submitted during the peer review process. They are not the versions of record or the final published versions. They should not be cited or distributed as the published version of this manuscript.

BMJ Open is an open access journal and the full, final, typeset and author-corrected version of record of the manuscript is available on our site with no access controls, subscription charges or pay-per-view fees (<http://bmjopen.bmj.com>).

If you have any questions on BMJ Open's open peer review process please email [info.bmjopen@bmj.com](mailto:info.bmjopen@bmj.com)

# BMJ Open

## EVIDENCE FOR PATIENT-IDENTIFIED PRIORITIES IN DEPRESSION RESEARCH: RESULTS OF 11 RAPID RESPONSES

|                               |                                                                                                                                                                                                                                                                                                                                                                                                                                                                                                                                                                                                                                                                                                                                                                                                                       |
|-------------------------------|-----------------------------------------------------------------------------------------------------------------------------------------------------------------------------------------------------------------------------------------------------------------------------------------------------------------------------------------------------------------------------------------------------------------------------------------------------------------------------------------------------------------------------------------------------------------------------------------------------------------------------------------------------------------------------------------------------------------------------------------------------------------------------------------------------------------------|
| Journal:                      | <i>BMJ Open</i>                                                                                                                                                                                                                                                                                                                                                                                                                                                                                                                                                                                                                                                                                                                                                                                                       |
| Manuscript ID                 | bmjopen-2018-026847                                                                                                                                                                                                                                                                                                                                                                                                                                                                                                                                                                                                                                                                                                                                                                                                   |
| Article Type:                 | Research                                                                                                                                                                                                                                                                                                                                                                                                                                                                                                                                                                                                                                                                                                                                                                                                              |
| Date Submitted by the Author: | 26-Sep-2018                                                                                                                                                                                                                                                                                                                                                                                                                                                                                                                                                                                                                                                                                                                                                                                                           |
| Complete List of Authors:     | Sebastianski, Meghan; University of Alberta Faculty of Medicine and Dentistry Department of Pediatrics ,<br>Gates, Michelle; University of Alberta, Pediatrics<br>Gates, Allison; University of Alberta, Department of Pediatrics<br>Nuspl, Megan; University of Alberta Faculty of Medicine and Dentistry Department of Pediatrics<br>Bialy, Liza ; University of Alberta, Department of Pediatrics; University of Alberta, Alberta Research Centre for Health Evidence<br>Featherstone, Robin; University of Alberta, Pediatrics; University of Alberta, Alberta Research Centre for Health Evidence<br>Breault, Lorraine; University of Alberta, Psychiatry<br>Maison-Lai, Ping; University of Alberta, Alberta SPOR SUPPORT Unit Patient Engagement Platform<br>Hartling, Lisa; University of Alberta, Pediatrics |
| Keywords:                     | Depression & mood disorders < PSYCHIATRY, Rapid Review, Patient-Identified Priorities, Patient Priority Setting Project                                                                                                                                                                                                                                                                                                                                                                                                                                                                                                                                                                                                                                                                                               |
|                               |                                                                                                                                                                                                                                                                                                                                                                                                                                                                                                                                                                                                                                                                                                                                                                                                                       |

SCHOLARONE™  
Manuscripts

1  
2  
3 **1 EVIDENCE FOR PATIENT-IDENTIFIED PRIORITIES IN DEPRESSION RESEARCH:**  
4 **2 RESULTS OF 11 RAPID RESPONSES**

5  
6  
7 3 Meghan Sebastianski,<sup>1</sup> Michelle Gates,<sup>2</sup> Allison Gates,<sup>2</sup> Megan Nuspl,<sup>1</sup> Liza M. Bialy,<sup>1</sup>

8  
9 4 Robin Featherstone,<sup>1,2</sup> Lorraine Breault,<sup>3</sup> Ping Mason-Lai,<sup>4</sup> Lisa Hartling<sup>1,2</sup>

10  
11  
12 **AFFILIATIONS:**

13 <sup>1</sup>Alberta SPOR SUPPORT Unit Knowledge Translation Platform, University of Alberta,  
14 Edmonton, Alberta, Canada

15 <sup>2</sup>Alberta Research Centre for Health Evidence (ARCHE), Department of Pediatrics, University  
16 of Alberta, Edmonton, Alberta, Canada

17 <sup>3</sup>Department of Psychiatry, Faculty of Medicine & Dentistry, University of Alberta, Edmonton,  
18 Alberta, Canada

19 <sup>4</sup>Alberta SPOR SUPPORT Unit Patient Engagement Platform, University of Alberta, Edmonton,  
20 Alberta, Canada

21  
22  
23  
24  
25 **CORRESPONDING AUTHOR:**

26  
27 17 Dr. Lisa Hartling

28 18 4-472 Edmonton Clinical Health Academy

29 19 Department of Pediatrics, Faculty of Medicine and Dentistry, University of Alberta

30 20 11405-87 Avenue, Edmonton AB T6G 1C9

31 21 P: 780-492-6124; E: hartling@ualberta.ca

32  
33  
34 23 **WORD COUNT: 4000**

1  
2  
3 26 **ABSTRACT**  
4

5 27 **OBJECTIVES:** Patient priority setting projects (PPSPs) can reduce research agenda bias. A key  
6  
7 28 element of PPSPs is a review of available literature to determine if the proposed research  
8  
9 29 priorities have been addressed, identify research gaps, recognize opportunities for knowledge  
10  
11 30 translation, and avoid duplication of research efforts. We conducted rapid responses on 11  
12  
13 31 patient-identified priorities in depression to provide a map of the existing evidence.  
14

15  
16 32 **METHODS:** In collaboration with the lead of the PPSP, we generated researchable questions  
17  
18 33 that reflected the original intent of the priorities. Research protocols were developed for each  
19  
20 34 question. We followed established guidance for rapid responses and scoping reviews to search  
21  
22 35 the literature, select studies for inclusion, and summarize the findings. We focused on systematic  
23  
24 36 reviews (SRs) if available, then randomized controlled trials and observational studies as  
25  
26 37 necessary.  
27

28  
29 38 **RESULTS:** For all but one of the rapid responses we identified existing SRs (median 7 SRs per  
30  
31 39 rapid response, range 0-179). There were questions where extensive evidence exists (i.e.,  
32  
33 40 hundreds of primary studies), yet uncertainties remain. For example, there is evidence supporting  
34  
35 41 the effectiveness of many non-pharmacological interventions (including psychological  
36  
37 42 interventions and exercise) to reduce depressive symptoms. However, targeted research is  
38  
39 43 needed that addresses comparative effectiveness of promising interventions, specific populations  
40  
41 44 of interest (e.g., children, minority groups), and adverse effects.  
42

43  
44 45 **CONCLUSIONS:** We identified an extensive body of evidence addressing patient priorities in  
45  
46 46 depression, and mapped the results and limitations of existing evidence, areas of uncertainty, and  
47  
48 47 general directions for future research. This work can serve as a solid foundation to guide future  
49  
50 48 research in depression and knowledge translation activities. Integrated knowledge syntheses  
51  
52  
53  
54  
55

1  
2  
3 49 bring value to the PPSP process; however, the role of knowledge synthesis in PPSPs and  
4  
5 50 methodological approaches are not well defined at present.  
6  
7

8 51

9  
10 52 **STRENGTHS AND LIMITATIONS OF THIS STUDY**

- 11  
12 53 • We provide a summary of the existing evidence for 11 patient-identified priority topics in  
13  
14 54 depression research.  
15  
16  
17 55 • This work provides a solid foundation to specify future research needs and knowledge  
18  
19 56 translation activities.  
20  
21  
22 57 • Our experience conducting knowledge syntheses for a patient priority setting project will  
23  
24 58 help inform this aspect of the James Lind Alliance methods.  
25

26 59  
27  
28  
29  
30  
31  
32  
33  
34  
35  
36  
37  
38  
39  
40  
41  
42  
43  
44  
45  
46  
47  
48  
49  
50  
51  
52  
53  
54  
55  
56

## 60 INTRODUCTION

61 Worldwide, an estimated 300 million people suffer from depression, a mental health disorder  
62 that is the primary contributor to global disability.<sup>(1)</sup> Although more prevalent in older female  
63 adults, depression can affect all ages, sexes, and ethnicities.<sup>(1, 2)</sup> For the individual, depression  
64 negatively affects physical health and well-being, leading to a reduced quality of life while  
65 exerting a considerable financial burden on society due to lost productivity, workplace  
66 absenteeism and healthcare costs.<sup>(2-6)</sup>

67 Historically, the research agenda has not aligned with patient priorities; research agendas are  
68 often biased toward commercial interests of funders and personal interests of researchers.<sup>(7)</sup> For  
69 example, registered trials comparing drug efficacies are much more common than those  
70 comparing drugs to non-drug therapies (86.3% vs. 2.6%), such as anti-depressants versus  
71 psychotherapy, which may be of more interest to patients.<sup>(7)</sup> Recently, numerous initiatives have  
72 been launched to incorporate the patient voice in health research.<sup>(8-10)</sup>

73 Involving patients with lived experience in research priority setting aids in ensuring research  
74 agendas reflect the interests of both patients and researchers, increasing the use and value of  
75 subsequent knowledge generation and translation.<sup>(7, 11, 12)</sup> With this in mind, the Alberta Strategy  
76 for Patient-Oriented Research (SPOR) SUPPORT Unit Patient Engagement Platform, in  
77 partnership with the Alberta Health Services Addictions and Mental Health Strategic Clinical  
78 Network and the Canadian Depression Research and Intervention Network, undertook the  
79 Alberta Depression Priority Setting Project (ADPSP). The aim of the project was to identify  
80 Albertans' top research priorities in the area of depression. The ADPSP adapted the James Lind  
81 Alliance (JLA) Priority Setting Project method to guide the process; detailed methods and results

1  
2  
3 82 are described elsewhere.<sup>(13, 14)</sup> In summary, the ADPSP undertook five steps: identification of a  
4  
5 83 topic and assembly of participants, gathering of research priorities from a public survey,  
6  
7 84 consolidation of proposed priorities, ranking through a second public survey, and a final  
8  
9 85 prioritization process to produce a list of top 11 priorities in depression research (Figure 1).  
10  
11  
12

13 86 A key element of any patient priority setting process is a literature review to determine if the  
14  
15 87 proposed research priorities have been previously answered.<sup>(15)</sup> The Knowledge Translation (KT)  
16  
17 88 Platform of the Alberta SPOR SUPPORT Unit undertook a series of rapid responses to examine  
18  
19 89 the extent and nature of existing evidence relating to the ADPSP's top 11 priorities. The goal  
20  
21 90 was to identify research gaps, recognize opportunities for knowledge translation, and prevent  
22  
23 91 duplication of research efforts. The purpose of this paper is to detail the available evidence for  
24  
25 92 the patient-identified priorities in depression, and to discuss our approach to knowledge synthesis  
26  
27 93 in the context of a patient priority setting project (PPSP).  
28  
29  
30  
31

## 32 94 **METHODS**

33  
34

35 95 Our methodological approach was guided by the Canadian Agency for Drugs and Technologies  
36  
37 96 in Health's (CADTH) searching guidelines for their Rapid Response Summary with Critical  
38  
39 97 Appraisal product.<sup>(16)</sup> As a first step, we worked with the ADPSP co-lead to generate  
40  
41 98 researchable questions to guide our syntheses. We undertook 11 rapid responses of nine priorities  
42  
43 99 suitable for knowledge synthesis. One of the priorities (#3, Figure 1) was multi-faceted and  
44  
45 100 divided into three sub-questions, and two health services questions (#5 and #6, Figure 1) were  
46  
47 101 better answered by internal health systems data. Table 1 details each rapid response question,  
48  
49 102 inclusion and exclusion criteria.  
50  
51  
52  
53  
54  
55  
56

**TABLE 1. KEY QUESTIONS AND INCLUSION/EXCLUSION CRITERIA**

| Question                                                                                                                                                                           | Population                                                                                                                    | Intervention/exposure                                                                                      | Comparison                                                                | Outcomes                                                              | Exclusions                                                                                    |
|------------------------------------------------------------------------------------------------------------------------------------------------------------------------------------|-------------------------------------------------------------------------------------------------------------------------------|------------------------------------------------------------------------------------------------------------|---------------------------------------------------------------------------|-----------------------------------------------------------------------|-----------------------------------------------------------------------------------------------|
| 1. Which treatment therapy or method for depression is more successful for long-term remission or recovery?                                                                        | Participants of any age diagnosed with depression                                                                             | ADM, psychotherapy alone or in combination                                                                 | Any other depression treatment                                            | Remission, relapse                                                    | Comparisons of individual ADMs or CAMs                                                        |
| 2. What are the long-term physical implications of pharmacotherapy for treating depression?                                                                                        | Participants of any age diagnosed with depression                                                                             | Current or past treatment with any ADM                                                                     | No ADM treatment or treatment with a different ADM                        | Long term (>1 year) physical harms of ADMs                            | Outcome: Short term harms                                                                     |
| 3a. For various non-pharmacological treatment options, what are the advantages in terms of cost?                                                                                   | Participants of any age with depression                                                                                       | Psychological treatment (psychotherapy, individual or group therapies, psychosocial support)               | Any other psychological treatment                                         | Cost effectiveness of psychological therapies                         | Comparator: pharmacological treatment, treatment as usual or no treatment.                    |
| 3b. For various non-pharmacological treatment options, what are the advantages in terms of safety?                                                                                 | Participants of any age with depression                                                                                       | Psychological treatment (psychotherapy, individual or group therapies, psychosocial support)               | Any other psychotherapeutic treatment                                     | Safety, adverse events, harms                                         | Comparators of pharmacological treatment, treatment as usual, no treatment or CAMs            |
| 3c. For various non-pharmacological treatment options, what are the advantages in terms of effectiveness and relapse prevention?                                                   | Participants of any age with depression                                                                                       | Psychological treatment (psychotherapy, individual or group therapies, psychosocial support)               | Any other psychological treatment                                         | Progression or severity of depression, relapse                        | Intervention: depression prevention;<br>Comparator: ADMs, treatment as usual or no treatment. |
| 4. What are the prevention strategies/tactics for reducing self-harm and suicide in children, youth and adults with depression?                                                    | Participants of any age diagnosed with depression                                                                             | Suicide or self-harm prevention programs                                                                   | None                                                                      | Suicide attempts and self-harm                                        | Pharmacological interventions                                                                 |
| 7. Can diet or exercise affect the development of depression?                                                                                                                      | Participants of any age diagnosed with depression                                                                             | Intervention related to current or modified dietary intake or exercise                                     | Antidepressant pharmacotherapy or a different dietary or exercise program | Development, progression and/or severity of depressive symptoms       | None                                                                                          |
| 8. What are the functional, social, intellectual, physical and psychological problems experienced by children and teens living with an immediate family member who has depression? | Children and/or adolescent participants 18 years of age or younger living with an immediate family member (parent or sibling) | No intervention. Exposure is living with an immediate family member who had been diagnosed with depression | None                                                                      | Functional, social, intellectual, physical and psychological problems | None                                                                                          |



1  
2  
3  
4  
5  
6  
7  
8  
9  
10  
11  
12  
13  
14  
15  
16  
17  
18  
19  
20  
21  
22  
23  
24  
25  
26  
27  
28  
29  
30  
31  
32  
33  
34  
35  
36  
37  
38  
39  
40  
41  
42  
43  
44  
45  
46  
47

| Question                                                                                                                                             | Population                                                                                   | Intervention/exposure                                                   | Comparison | Outcomes                                                                                      | Exclusions                                                                                                                      |
|------------------------------------------------------------------------------------------------------------------------------------------------------|----------------------------------------------------------------------------------------------|-------------------------------------------------------------------------|------------|-----------------------------------------------------------------------------------------------|---------------------------------------------------------------------------------------------------------------------------------|
|                                                                                                                                                      | living in the same residence) who had been diagnosed with depression                         |                                                                         |            |                                                                                               |                                                                                                                                 |
| 9. What interventions are effective in preventing and treating workplace depression and reducing stigma associated with depression in the workplace? | Participants of any age with depression                                                      | Workplace interventions                                                 | None       | Change in symptom progression or severity; reduction in stigma                                | Studies with general outcomes of mental health and psychological wellbeing that did not specifically report depression outcomes |
| 10. Are there structural or functional changes in brains due to antidepressant therapy during brain development (in children)?                       | Children and/or adolescent participants 18 years of age or younger diagnosed with depression | Treatment with ADMs                                                     | None       | Structural or functional development of the brain                                             | None                                                                                                                            |
| 11. What is the role of the family in the treatment and trajectory of depression?                                                                    | Participants of any age                                                                      | Involvement of family members in the patient's management of depression | None       | Symptom progression or severity; family's influence on treatment decisions or remission rates | None                                                                                                                            |

104 ADM: antidepressant medication; CAM: complementary or alternative medicine

105

For peer review only

## 106 **Search**

107 For each question we searched PubMed via NCBI Entrez (1946-current) for key concepts (Table  
108 1). We applied study design filters, where appropriate, to identify and organize citations by  
109 systematic reviews (SRs), randomized controlled trials (RCTs), and observational (non-  
110 randomized) studies. Search results were limited to English-language publications from 2007,  
111 and were executed for each question between July and October 2017. The search strategies are  
112 available in Appendix 1. Records were managed in EndNote X7 (Clarivate Analytics,  
113 Philadelphia, Pennsylvania) and screened in Microsoft Office Excel 2016 (Microsoft, Redmond,  
114 Washington).

## 115 **Study Selection**

116 For eight rapid responses we undertook staged screening by study design (SRs first, then RCTs,  
117 then observational studies) dependent on the quantity and level of evidence identified at each  
118 stage (Figure 2). For three rapid responses we screened all study designs. Primary screening (title  
119 and abstract) followed by secondary full text screening was done by a single reviewer based on  
120 a-priori eligibility criteria (Table 1).

## 121 **Data Extraction and Quality Assessment**

122 Key study characteristics (study design, participants, methods), general findings, and conclusions  
123 were extracted by a single reviewer. Included studies were not assessed for quality as the goal  
124 was to map all the evidence available rather than answer a specific question based on the best  
125 available evidence;<sup>(17)</sup> however, author-reported study limitations were extracted and included in  
126 the summary tables.

## 127 **Data Synthesis**

128 We synthesized the findings narratively and in tabular format, and presented conclusions in  
129 terms of the quantity and level of the existing evidence and future research needs/priorities.

## 130 **Patient Involvement**

131 Persons with lived experience were members of the steering committee that led the work of the  
132 ADPSP and over 600 members of the public responded to the ADPSP survey. While the  
133 depression research priorities identified by the ADPSP were the foundation of the rapid  
134 responses, patients were not directly involved in the knowledge synthesis process.

## 135 **RESULTS**

136 Across the 11 rapid responses, we included 158 studies and identified existing SRs for all but  
137 one of the questions (median 7 SRs per rapid response, range 0 to 179) (Figure 2). A narrative  
138 summary of the findings of each rapid response is presented below. The conclusions and  
139 limitations of the existing evidence and future research needs/priorities are outlined in Table 2;  
140 details of each included study are available in Appendix 2.

141

**TABLE 2. CONCLUSIONS, LIMITATIONS AND RESEARCH NEEDS IDENTIFIED FROM AVAILABLE EVIDENCE FOR PATIENT-IDENTIFIED PRIORITY QUESTIONS**

| Question                                                                                                      | Number and type of included studies; publication years; total number of studies or participants (median; range)                                            | Conclusions                                                                                                                                                                                                                                                                                                                                                                       | Limitations                                                                                                                                                                                                                                                                                                                                            | Research Needs                                                                                                                                                                                                                                                                                                                                                                                                       |
|---------------------------------------------------------------------------------------------------------------|------------------------------------------------------------------------------------------------------------------------------------------------------------|-----------------------------------------------------------------------------------------------------------------------------------------------------------------------------------------------------------------------------------------------------------------------------------------------------------------------------------------------------------------------------------|--------------------------------------------------------------------------------------------------------------------------------------------------------------------------------------------------------------------------------------------------------------------------------------------------------------------------------------------------------|----------------------------------------------------------------------------------------------------------------------------------------------------------------------------------------------------------------------------------------------------------------------------------------------------------------------------------------------------------------------------------------------------------------------|
| 141. Which treatment therapy or method for depression is more successful for long-term remission or recovery? | 11 SRs<br>2007-2016<br>N=143 studies (2; 1-69 per SR)                                                                                                      | Most reviews reported no difference in the risk of remission for patients treated with ADM, psychotherapies, or combination therapies. Evidence for the comparative effectiveness of various therapies for preventing relapse is mixed.                                                                                                                                           | Despite the availability of multiple evidence syntheses, many of the review-level comparisons were limited to few RCTs with small sample sizes, often at high risk of bias. Between-study heterogeneity in populations, treatments, length of follow up, and definitions of remission and relapse also hindered the development of strong conclusions. | It appears that there is a need for more robustly conducted, transparently reported trials among children, adolescents, and adults comparing various treatments to determine with confidence which therapy is most effective. Subgroup analyses by depression severity and chronicity are needed to inform tailored management strategies.                                                                           |
| 2. What are the long-term physical implications of pharmacotherapy for treating depression?                   | 6 SRs, 1 review<br>2010-2015<br>N=92 studies (14; 12-23 per SR)^<br><br>3 Obs<br>2013-2016<br>n=639,833 participants<br>(109,736; 5,145-523,952 per study) | There appears to be extensive evidence from SRs of observational studies supporting a relationship between ADM use and risk of fracture, but a lack of RCTs has limited the ability to infer causality.<br><br>There appears to be limited evidence from SRs and observational studies for a possible relationship between ADM use and incident diabetes and cardiovascular risk. | Lack of controlling for confounders, heterogeneity in outcome measures, limited number of RCTs (especially those with long-term follow-up)                                                                                                                                                                                                             | It remains unclear whether other physical harms of ADMs may exist, as these have not been reported. Randomized trials with long-term follow-up would strengthen the evidence but the feasibility of these is questionable; at a minimum RCTs should include and systematically gather information on adverse effects. For newer ADMs, continued research is needed for evidence related to long-term physical harms. |
| 3a. For various non-pharmacological treatment options, what are the advantages in terms of cost?              | 4 SRs<br>2010-2016<br>N=7 studies (2; 1-3 per SR)<br><br>10 RCTs                                                                                           | We identified comparisons of cost effectiveness between a vast array of psychological therapies, though few were supported by more than one study. Comparative cost effectiveness trials are few considering the multitude of available                                                                                                                                           | Small number of included studies for SRs; methodological limitations (i.e., probable confounding, a lack of control groups, high attrition rates, and limited generalizability outside of the region in which each therapy was studied).                                                                                                               | There is a need for methodologically robust comparative effectiveness trials with cost analyses for the various available therapies (especially those that show promise).                                                                                                                                                                                                                                            |

10

Evidence for Patient-Identified Priorities in Depression Research

1  
2  
3  
4  
5  
6  
7  
8  
9  
10  
11  
12  
13  
14  
15  
16  
17  
18  
19  
20  
21  
22  
23  
24  
25  
26  
27  
28  
29  
30  
31  
32  
33  
34  
35  
36  
37  
38  
39  
40  
41  
42  
43  
44  
45  
46  
47

| Question | Number and type of included studies; publication years; total number of studies or participants (median; range) | Conclusions | Limitations | Research Needs |
|----------|-----------------------------------------------------------------------------------------------------------------|-------------|-------------|----------------|
|----------|-----------------------------------------------------------------------------------------------------------------|-------------|-------------|----------------|

|                                                                                                                                  |                                                                                                                                             |                                                                                                                                                                                                                                                                                                                                               |                                                                                                                                                                                      |                                                                                                                                                                                                                                                                                                                                                             |
|----------------------------------------------------------------------------------------------------------------------------------|---------------------------------------------------------------------------------------------------------------------------------------------|-----------------------------------------------------------------------------------------------------------------------------------------------------------------------------------------------------------------------------------------------------------------------------------------------------------------------------------------------|--------------------------------------------------------------------------------------------------------------------------------------------------------------------------------------|-------------------------------------------------------------------------------------------------------------------------------------------------------------------------------------------------------------------------------------------------------------------------------------------------------------------------------------------------------------|
|                                                                                                                                  | 2007-2017<br>N= 4796 participants (229; 101-2,659 per study)<br><br>4 Obs<br>2010-2015<br>N= 40,214 participants (451; 85-39,227 per study) | therapies.                                                                                                                                                                                                                                                                                                                                    |                                                                                                                                                                                      |                                                                                                                                                                                                                                                                                                                                                             |
| 3b. For various non-pharmacological treatment options, what are the advantages in terms of safety?                               | 2 SRs<br>2013-2015<br>N=26 studies (13; 1-25 per SR)<br><br>6 RCTs<br>2012-2017<br>N=2,124 participants (327; 34 -780 per study)            | It appears that most studies comparing psychotherapies for depression do not collect adverse events data. Of those that do, adverse events related to the psychotherapies are infrequently reported. It is possible that data on harms from non-comparative studies exist, but this fell outside the scope of the review.                     | Neither review identified any studies that reported on adverse events. RCTs were heterogeneous with respect to population and the psychotherapies investigated.                      | Considering the paucity of data on the comparative harms of psychotherapies for depression, there is a need for more primary research before definitive conclusions about their safety can be drawn. As above. RCTs should regularly include outcomes related to adverse events, and employ mechanisms to systematically and rigorously collect these data. |
| 3c. For various non-pharmacological treatment options, what are the advantages in terms of effectiveness and relapse prevention? | 27 SRs<br>2007-2017<br>N=881 studies (15; 1-198 per SR)                                                                                     | The quantity and breadth of SR evidence indicates a great interest in the comparative effectiveness of various psychological treatments for depression among all age groups.<br><br>Much of the available evidence suggests no significant difference between the various treatments; when differences were detected they tended to be minor. | Shortage of head-to-head trials directly comparing various psychotherapies; therefore, in most cases the quality of the evidence was low or insufficient to draw strong conclusions. | The certainty of the evidence is low or lacking for several therapies. It is unclear where further high quality, adequately powered head-to-head trials would change the conclusions.                                                                                                                                                                       |

1  
2  
3  
4  
5  
6  
7  
8  
9  
10  
11  
12  
13  
14  
15  
16  
17  
18  
19  
20  
21  
22  
23  
24  
25  
26  
27  
28  
29  
30  
31  
32  
33  
34  
35  
36  
37  
38  
39  
40  
41  
42  
43  
44  
45  
46  
47

| Question                                                                                                                        | Number and type of included studies; publication years; total number of studies or participants (median; range)                                                                                         | Conclusions                                                                                                                                                                                                                                                                                                                                                                                                                             | Limitations                                                                                                                                                          | Research Needs                                                                                                                                                                                                                                                                                                                                                                                                                                                                                      |
|---------------------------------------------------------------------------------------------------------------------------------|---------------------------------------------------------------------------------------------------------------------------------------------------------------------------------------------------------|-----------------------------------------------------------------------------------------------------------------------------------------------------------------------------------------------------------------------------------------------------------------------------------------------------------------------------------------------------------------------------------------------------------------------------------------|----------------------------------------------------------------------------------------------------------------------------------------------------------------------|-----------------------------------------------------------------------------------------------------------------------------------------------------------------------------------------------------------------------------------------------------------------------------------------------------------------------------------------------------------------------------------------------------------------------------------------------------------------------------------------------------|
| 4. What are the prevention strategies/tactics for reducing self-harm and suicide in children, youth and adults with depression? | 3 Overviews of SRs 2011-2016<br>N=72 SRs (28;6-38 per overview)<br><br>17 SRs 2009-2017<br>N=546 studies (19; 1-164 per SR)                                                                             | Systematic reviews of non-pharmacological strategies for reducing self-harm and suicide exist for all ages, with the majority indicating a potential benefit of psychological interventions on depressive symptoms but limited evidence of benefit for suicidality.                                                                                                                                                                     | Shortage of studies addressing different age groups and ethnic or racial populations; high heterogeneity with respect to populations and interventions investigated. | The reviews for children and young people provide some conflicting results, suggesting that additional work may be needed to identify the most efficacious strategies. Many studies concluded that additional research is needed to examine multifaceted approaches for older adult populations.                                                                                                                                                                                                    |
| 7. Can diet or exercise affect the development of depression?                                                                   | 27 SRs 2009-2017<br>N=352 studies (14;3-90 per SR)<br><br>2 RCTs 2012,2015<br>N=353 participants (177; 80-273 per study)<br><br>13 Obs 2009-2016<br>N=256,930 patients (10,094; 1,358-82,643 per study) | There is high-level evidence for the use of exercise as a single or adjunct treatment for depression, with study heterogeneity making it difficult to make firm recommendations for specific populations, amount, and type of exercise to produce the greatest patient benefit. A lack of synthesis among dietary studies limit the ability to draw conclusions about diet type or specific diet elements and their role in depression. | High heterogeneity of study quality and types of exercise program components.                                                                                        | More research on the specific parameters of exercise in each population for effective treatment of depression is needed. While multiple large, observational studies exploring the connection between diet and depression exist, there is a paucity of higher levels of evidence that synthesize the findings. In the existing literature, exercise is approached from the standpoint of treatment for existing depression, and publications examining diet mostly explore its role in development. |
| 8. What are the functional, social, intellectual, physical and psychological problems experienced                               | 7 SRs 2007-2016<br>N=285 studies (16;9-193 per SR)                                                                                                                                                      | There was limited evidence and discussion of child outcomes as the majority of the reviews focused on treatment options and interventions for the mothers who have depression. This population of children and                                                                                                                                                                                                                          | Lack of controlling for confounders.                                                                                                                                 | Studies addressing the impact on children who live with a family member with depression are lacking.                                                                                                                                                                                                                                                                                                                                                                                                |

1  
2  
3  
4  
5  
6  
7  
8  
9  
10  
11  
12  
13  
14  
15  
16  
17  
18  
19  
20  
21  
22  
23  
24  
25  
26  
27  
28  
29  
30  
31  
32  
33  
34  
35  
36  
37  
38  
39  
40  
41  
42  
43  
44  
45  
46  
47

| Question | Number and type of included studies; publication years; total number of studies or participants (median; range) | Conclusions | Limitations | Research Needs |
|----------|-----------------------------------------------------------------------------------------------------------------|-------------|-------------|----------------|
|----------|-----------------------------------------------------------------------------------------------------------------|-------------|-------------|----------------|

|                                                                                                                                                      |                                                                                          |                                                                                                                                                                                                                                                                                                                           |                                                                                                                                                                                                 |                                                                                                                                                                                                                                          |
|------------------------------------------------------------------------------------------------------------------------------------------------------|------------------------------------------------------------------------------------------|---------------------------------------------------------------------------------------------------------------------------------------------------------------------------------------------------------------------------------------------------------------------------------------------------------------------------|-------------------------------------------------------------------------------------------------------------------------------------------------------------------------------------------------|------------------------------------------------------------------------------------------------------------------------------------------------------------------------------------------------------------------------------------------|
| by children and teens living with an immediate family member who has depression?                                                                     |                                                                                          | mothers are often exposed to multiple risk factors such as partner/parental conflict and low socioeconomic status making it difficult to draw any causal associations.                                                                                                                                                    |                                                                                                                                                                                                 |                                                                                                                                                                                                                                          |
| 9. What interventions are effective in preventing and treating workplace depression and reducing stigma associated with depression in the workplace? | 7 SRs<br>2009-2016<br>N=560 studies (17;1-481 per SR)                                    | Workplace interventions appear to have a positive effect on depressive symptoms. There was no single intervention that was identified by the reviews as being the most effective for improving symptoms of depression; however, cognitive behavioural therapy had the most evidence supporting its effectiveness.         | Small number of participants in the studies; inconsistencies in outcome measurements for depression. When absenteeism was used as proxy measure for depression studies had a high risk of bias. | There is evidence supporting a number of effective workplace interventions that would benefit people with depression. Increased awareness and subsequent implementation of these interventions is likely to improve depressive symptoms. |
| 10. Are there structural or functional changes in brains due to antidepressant therapy during brain development (in children)?                       | 1 review<br>2015<br>Number of studies not reported<br><br>1 Obs<br>2012<br>N=15 patients | There is a paucity of human studies addressing the effects of antidepressants on adolescent brain development.                                                                                                                                                                                                            | Studies included had a number of confounding factors.                                                                                                                                           | There is a need for primary human research studies in this area before any conclusions can be drawn.                                                                                                                                     |
| 11. What is the role of the family in the treatment and trajectory of depression?                                                                    | 6 SRs<br>2007-2017<br>N=95 studies (10; 6-39 per SR)                                     | Involvement of family members in a therapy or psychoeducation intervention with a patient with depression can positively impact the patient's depressive symptoms. The most effective type of intervention has yet to be determined. There were also reported benefits for families, with an improved quality of life for | Small numbers of included studies with significant heterogeneity between studies and varying quality.                                                                                           | It is unclear which types of family intervention have the greatest impact on a patient's depressive symptoms. Research opportunities on the benefits to families should also be considered.                                              |

1  
2  
3  
4  
5  
6  
7  
8  
9  
10  
11  
12  
13  
14  
15  
16  
17  
18  
19  
20  
21  
22  
23  
24  
25  
26  
27  
28  
29  
30  
31  
32  
33  
34  
35  
36  
37  
38  
39  
40  
41  
42  
43  
44  
45  
46  
47

| Question | Number and type of included studies; publication years; total number of studies or participants (median; range) | Conclusions | Limitations | Research Needs |
|----------|-----------------------------------------------------------------------------------------------------------------|-------------|-------------|----------------|
|----------|-----------------------------------------------------------------------------------------------------------------|-------------|-------------|----------------|

caregivers including a reduction in depressive symptoms.

143 **ADM:** antidepressant medication; **CBT:** cognitive behavioural therapy; **Obs:** Observational studies; **RCT:** randomized controlled trial; **SR:** systematic review  
 144 ^The non-systematic review did not report the number of studies included.  
 145  
 146

For peer review only



1  
2  
3 147 **Q1. Which treatment therapy or method for depression is more successful for long-term**  
4  
5 148 **remission or recovery?**

6  
7  
8 149 **Remission:** The evidence did not support a difference in remission rates among patients treated  
9  
10 150 with antidepressant medication (ADM) compared to cognitive behavioural therapy (CBT),<sup>(18-20)</sup>  
11  
12 151 interpersonal psychotherapy,<sup>(18, 19)</sup> psychodynamic therapy,<sup>(19)</sup> or combination therapies (ADM  
13  
14 152 and CBT).<sup>(19)</sup> One review reported there was insufficient evidence to draw conclusions about  
15  
16 153 ADM effectiveness compared to third-wave CBT.<sup>(19)</sup> Two reviews found no difference in  
17  
18 154 remission rates between patients with treatment-resistant depression who: were treated with  
19  
20 155 ADM or psychotherapy;<sup>(21)</sup> switched from ADM to a new ADM or to cognitive therapy (CT);<sup>(19)</sup>  
21  
22 156 or augmented ADM with a new ADM or with CT.<sup>(19)</sup> For children and adolescents there was  
23  
24 157 insufficient evidence to determine the most effective treatment to induce remission.<sup>(22)</sup>

25  
26  
27 158 **Relapse prevention:** Reduction in relapse risk was found among patients treated with ADM  
28  
29 159 compared to psychotherapy;<sup>(23)</sup> with psychotherapy (alone or in combination with ADM) after  
30  
31 160 response to ADM;<sup>(24)</sup> and with augmentation of treatment as usual (with or without ADM) with  
32  
33 161 mindfulness-based cognitive therapy (MBCT).<sup>(25)</sup> One review found no difference between  
34  
35 162 maintenance ADM and MBCT.<sup>(26)</sup> For children and adolescents, increased relapse risk was  
36  
37 163 reported among patients treated with ADM alone compared to ADM with CBT.<sup>(27)</sup>

38  
39  
40  
41 164 **Q2. What are the long-term physical implications of pharmacotherapy for treating**  
42  
43 165 **depression?**

44  
45  
46  
47 166 The observational SR<sup>(28-32)</sup> findings support a relationship between ADM use and risk of incident  
48  
49 167 fracture that appears to be independent of bone mineral density. Persistence of risk over time is  
50  
51 168 unclear.<sup>(28, 32)</sup> One SR<sup>(33)</sup> supported an association between ADM use and incident diabetes, and

1  
2  
3 169 another<sup>(34)</sup> associated certain ADMs with weight gain, cardiovascular events and fractures. Two  
4  
5 170 cohort studies<sup>(35, 36)</sup> support an association between ADM use and incident cardiovascular risk  
6  
7  
8 171 factors, while one cohort study<sup>(37)</sup> did not support any association between ADM use and incident  
9  
10 172 hepatocellular carcinoma in adults with hepatitis C.

13 173 **Q3a. For various non-pharmacological treatment options what are the advantages in terms**  
14  
15 174 **of cost?**

18 175 Considerable heterogeneity in the types of therapies researched precluded meaningful synthesis.  
19  
20 176 The included studies examined 16 different therapies: behavioural activation,<sup>(38, 39)</sup> CBT,<sup>(39-52)</sup>  
21  
22 177 general counselling,<sup>(41)</sup> person-centred therapy,<sup>(48)</sup> problem-solving therapy,<sup>(52)</sup>  
23  
24 178 psychoanalysis,<sup>(43, 53)</sup> psychoanalytic psychotherapy,<sup>(53)</sup> psychoeducation,<sup>(46, 54)</sup> CBT-enhanced  
25  
26 179 psychoeducation,<sup>(46)</sup> psychologist-enhanced psychoeducation,<sup>(46)</sup> short-<sup>(46, 55)</sup> and long-term<sup>(55)</sup>  
27  
28 180 psychodynamic therapy, psychosocial therapy,<sup>(43)</sup> relaxation therapy,<sup>(40)</sup> self-management  
29  
30 181 therapy,<sup>(54)</sup> and solution-focused therapy.<sup>(46, 55)</sup> The SRs<sup>(40, 41, 46, 49)</sup> each included zero to three  
31  
32 182 studies with relevant comparisons that presented economic data.

37 183 Across all 18 included studies there were 22 different cost effectiveness comparisons; two SRs  
38  
39 184 each included three<sup>(43)</sup> and four<sup>(46)</sup> relevant comparisons, and only two primary studies  
40  
41 185 investigated the same comparison (telephone vs. in-person CBT).<sup>(44, 45)</sup> There were two SRs,<sup>(40, 49)</sup>  
42  
43 186 three RCTs,<sup>(42, 44, 45, 47, 50, 51)</sup> and three observational studies<sup>(42, 44, 51)</sup> that focused specifically on  
44  
45 187 various approaches to the delivery of CBT. Overall, the RCTs and observational studies were  
46  
47 188 hindered by numerous methodological limitations, and given the disparate nature of the  
48  
49 189 comparisons it is not possible to draw conclusions about the comparative cost effectiveness of  
50  
51 190 various treatment options.

1  
2  
3 191 **Q3b. For various psychotherapeutic treatment options what are the advantages in terms of**  
4  
5 192 **safety?**  
6  
7

8 193 One SR investigated CBT compared to supportive psychotherapy for adults with depression  
9  
10 194 following traumatic brain injury.<sup>(56)</sup> Another SR investigated behavioural therapy compared to  
11  
12 195 other psychotherapies for adults with depression.<sup>(57)</sup> Neither SR identified studies that reported  
13  
14 196 adverse events.  
15  
16

17  
18 197 The RCTs were heterogeneous with respect to population and psychotherapies investigated.  
19  
20 198 Populations included adolescent and adult inpatients and outpatients with depression, with and  
21  
22 199 without co-morbid conditions. Psychotherapeutic treatments included behavioural activation,<sup>(39,</sup>  
23  
24 200 <sup>58)</sup> counseling,<sup>(59)</sup> various forms of CBT,<sup>(39, 59-62)</sup> psychoanalytical therapy,<sup>(61)</sup> and psychosocial  
25  
26 201 interventions.<sup>(61)</sup> Two RCTs investigated psychotherapies delivered via different means.<sup>(58, 62)</sup>  
27  
28  
29

30 202 One RCT reported no difference in adverse events between a brief psychosocial intervention,  
31  
32 203 CBT, and short-term psychoanalytical therapy groups.<sup>(61)</sup> Another RCT reported adverse events  
33  
34 204 that were possibly or probably related to the psychotherapies.<sup>(59)</sup> Mild adverse events were  
35  
36 205 reported in the computerized CBT group (n=1) and the face-to-face CBT group (n=2); eight  
37  
38 206 moderate adverse events (e.g., increased suicidal thinking) were reported in each group. Serious  
39  
40 207 adverse events (suicide attempts) were reported in the computerized CBT group (n=2) and the  
41  
42 208 face-to-face CBT group (n=1). No other adverse events were reported.  
43  
44  
45  
46

47 209 **Q3c. For various non-pharmacological treatment options what are the advantages in terms**  
48  
49 210 **of effectiveness and relapse prevention?**  
50  
51  
52  
53  
54  
55

1  
2  
3 211 Included SRs<sup>(56, 57, 63-87)</sup> mainly compared psychotherapy or CBT versus other psychotherapies  
4  
5 212 across several populations (e.g., children, adolescents, adults, postpartum, older adults). There  
6  
7  
8 213 were also comparisons for varied treatment modalities (e.g., online vs. face-to-face), formats  
9  
10 214 (e.g., individual vs. group), and level of therapist training. With some exceptions, the available  
11  
12 215 evidence suggests no significant difference between the treatments under study for post-  
13  
14 216 treatment effectiveness (i.e., symptom reduction), remission, and continued effectiveness at  
15  
16 217 varying lengths of follow-up (i.e., relapse prevention). When differences were noted, the effect  
17  
18 218 estimates were usually small and imprecise.

19  
20  
21  
22 219 Despite the large number of SRs, they were limited by a shortage of trials directly comparing  
23  
24 220 various psychotherapies; some therapies were left out entirely. There was less evidence for long-  
25  
26 221 term treatment effects, and questions remain about which patients would be best suited to the  
27  
28 222 various treatments.

29  
30  
31  
32 223 **Q4. What are the prevention strategies/tactics for reducing self-harm and suicide in**  
33  
34 224 **children, youth, and adults with depression?**

35  
36  
37 225 **Children, adolescents, and young adults:** Eight reviews<sup>(88-95)</sup> examined interventions grouping  
38  
39 226 children, adolescents, and young adults ( $\leq 24$  years). One SR<sup>(94)</sup> found that interpersonal  
40  
41 227 psychotherapy reduced depressive symptoms in adolescents, but did not impact suicide. Three  
42  
43 228 reviews<sup>(88, 89, 92)</sup> examined school-based interventions for suicide reduction; two overviews<sup>(88, 89)</sup>  
44  
45 229 found some benefit to school-based strategies, while one SR<sup>(92)</sup> found few studies examining this  
46  
47 230 type of intervention and was unable to draw conclusions. Three SRs<sup>(90, 91, 95)</sup> examined  
48  
49 231 psychological interventions. One<sup>(90)</sup> concluded that psychological strategies hold promise as a  
50  
51 232 suicide prevention strategy in this population; one<sup>(91)</sup> found minimal support for group-based  
52  
53  
54  
55

1  
2  
3 233 therapy, while the other<sup>(95)</sup> argued that group-based therapy might be effective in suicide  
4  
5 234 prevention. One SR<sup>(93)</sup> examined online and mobile application interventions and could not draw  
6  
7  
8 235 strong conclusions from the single included study.

9  
10 236 **Adults:** Four SRs<sup>(96-99)</sup> investigated interventions aimed at preventing self-harm and suicide in  
11  
12 237 adults. Two<sup>(97, 98)</sup> found that CBT and dialectical behaviour therapy may be effective at  
13  
14  
15 238 preventing and reducing self-harm in those with previous episodes. One<sup>(96)</sup> was unable to draw  
16  
17 239 conclusions on the effectiveness of psychotherapy for suicidality, and one<sup>(99)</sup> found CBT to be an  
18  
19 240 effective treatment for depressive symptoms, but did not have a clear effect on suicidality.

20  
21  
22 241 **Older adults:** Two SRs<sup>(100, 101)</sup> addressed suicidality in older populations ( $\geq 60$  years). Both  
23  
24 242 found that multifaceted primary care interventions were effective in reducing suicidal behaviour,  
25  
26 243 with one<sup>(100)</sup> reporting a greater effect in women.

27  
28  
29 244 **All ages; age not indicated:** Six reviews<sup>(102-107)</sup> targeted multiple age groups, or did not specify  
30  
31 245 the age group. One SR<sup>(102)</sup> found text messaging interventions were effective in patients  
32  
33 246 contemplating suicide. Three SRs<sup>(103-105)</sup> found psychotherapy-based interventions to be an  
34  
35 247 effective treatment of patients with depression or contemplating suicide, though one<sup>(105)</sup> noted  
36  
37 248 that the effect did not carry over to adolescents. Two reviews<sup>(106, 107)</sup> concluded that more  
38  
39 249 research is needed on combined therapies to determine the potential synergistic benefits of a  
40  
41 250 multi-faceted approach.

#### 42 251 **Q7. Can diet or exercise affect the development of depression?**

43  
44  
45 252 **Diet:** We identified evidence for the role of diet in the treatment or prevention of depression  
46  
47 253 from two narrative reviews<sup>(108, 109)</sup> and 13 observational studies<sup>(110-122)</sup>. One review<sup>(108, 109)</sup> found

1  
2  
3 254 that the importance of good nutrition for mental health is supported in the literature, especially  
4  
5 255 for older populations, and the second<sup>(108)</sup> found that Western diets might be associated with a  
6  
7 256 higher risk of depression. Of the observational studies, two studies<sup>(111, 114)</sup> reported that dietary  
8  
9  
10 257 patterns were not associated with depression risk or development, but one<sup>(114)</sup> noted that overall  
11  
12 258 caloric intake was inversely related to depression in older people. Three studies<sup>(119-121)</sup> found that  
13  
14 259 moderate adherence to a certain diet type was associated with lower rates of depression. The  
15  
16 260 remaining studies investigated specific nutrients. Five studies<sup>(112, 116-118, 122)</sup> examined fish or the  
17  
18 261 consumption of specific fatty acids. One<sup>(118)</sup> reported no association between fat intake and  
19  
20 262 depression; another<sup>(117)</sup> found no relationship between omega-3 polyunsaturated fatty acids  
21  
22 263 (PUFA) and depression, but reported an inverse relationship between  $\alpha$ -linoleic acid and  
23  
24 264 depressive symptoms. Two studies<sup>(112, 116)</sup> reported an inverse relationship between depression  
25  
26 265 risk and fish consumption. One study<sup>(121)</sup> found that higher trans fatty acid consumption was  
27  
28 266 associated with a higher risk of depression, as well as an inverse association between  
29  
30 267 monounsaturated fatty acids (MUFA), PUFA, or olive oil consumption and depression. Of the  
31  
32 268 remaining studies, one<sup>(115)</sup> found no association between zinc intake and depression risk, one<sup>(113)</sup>  
33  
34 269 found a moderate positive relationship between dietary fibre intake and depression rates, and  
35  
36 270 one<sup>(110)</sup> reported that higher flavonoid intake may decrease the risk of developing depression.  
37  
38  
39  
40  
41  
42

43 271 **Exercise and depression:** Twenty-five SRs<sup>(123-149)</sup> provided evidence regarding the role of  
44  
45 272 exercise in the treatment or prevention of depression. Two SRs focusing on adolescents with  
46  
47 273 depression<sup>(123, 140)</sup> found exercise to be effective in reducing depression symptoms. Three SRs  
48  
49 274 found exercise effective for depressive symptoms in elderly patients, with one concluding that  
50  
51 275 exercise had a large antidepressant effect<sup>(147)</sup>, one finding no difference between exercise and  
52  
53 276 antidepressant drugs<sup>(145)</sup>, and the third finding exercise in conjunction with antidepressants to be  
54  
55  
56

20

Evidence for Patient-Identified Priorities in Depression Research

1  
2  
3 277 effective in elderly patients with treatment resistant depression<sup>(135)</sup>. Two reviews looked at  
4  
5 278 exercise for depression in special populations, with one finding reduced symptoms in pregnant  
6  
7 279 women<sup>(149)</sup>, and the other finding the same result in patients with chronic disease<sup>(130)</sup>. Three  
8  
9  
10 280 reviews found exercise to be effective as an adjunct to other therapy, including pharmacological  
11  
12 281 or psychosocial<sup>(125, 136, 142)</sup>. Two reviews<sup>(131, 134)</sup> did not find sufficient evidence to suggest a  
13  
14 282 benefit of exercise. The remaining reviews found exercise a favourable intervention in terms of  
15  
16 283 symptom reduction or relapse prevention, with exercise providing additional benefit over no  
17  
18 284 treatment, or demonstrating no difference from pharmacological or psychological treatments<sup>(124,</sup>  
19  
20  
21 285 126, 128, 133, 137-139, 141, 146).

22  
23  
24 286 **Diet, exercise and depression:** Two RCTs<sup>(127, 148)</sup> examined interventions with both dietary and  
25  
26 287 exercise components. The first<sup>(127)</sup> was a pilot of the later study<sup>(148)</sup>. While the pilot study found  
27  
28 288 that specific lifestyle recommendations were an effective complement to antidepressant  
29  
30 289 therapy<sup>(127)</sup>, the larger study did not find the same association<sup>(148)</sup>.

31  
32  
33  
34 290 **Q8. What are the functional, social, intellectual, physical and psychological problems**  
35  
36 291 **experienced by children and teens living with an immediate family member who has**  
37  
38 292 **depression?**

39  
40  
41 293 Two SRs<sup>(150, 151)</sup> and a meta-analysis<sup>(152)</sup> found children had significantly higher intelligence  
42  
43 294 quotient scores if their mothers were not diagnosed with post-natal depression. For children with  
44  
45 295 a depressed family member, one SR<sup>(151)</sup> reported either weak or no evidence for all outcomes  
46  
47 296 while another SR<sup>(150)</sup> reported that maternal depression was more strongly associated with  
48  
49 297 internalizing problems than with negative or positive emotion/behaviour, and with children's  
50  
51  
52  
53  
54  
55  
56

298 general psychopathology than with externalizing problems and negative or positive  
299 emotion/behaviour.

300 Four SRs reported on a variety of outcomes. One<sup>(153)</sup> suggested that chronic maternal depression  
301 may play an important role in a child being overweight while another<sup>(154)</sup> reported that when  
302 maternal depression exists, early childhood aggression is more likely to occur. Parental pre- and  
303 postnatal depression was found to be responsible for increasing the mean rate of behavioural and  
304 emotional problems<sup>(155)</sup> and antenatal depression was found to affect children's conduct  
305 problems and antisocial behaviours<sup>(156)</sup>.

306 **Q9. What interventions are effective in preventing and treating workplace depression and**  
307 **reducing stigma associated with depression in the workplace?**

308 Five SRs<sup>(157-161)</sup> measuring depression directly reported that workplace interventions showed  
309 positive effects on depression severity, with one meta-analysis<sup>(161)</sup> indicating a small effect size.  
310 No single intervention was identified as being the most effective for improving symptoms of  
311 depression; however, CBT had the most evidence supporting its effectiveness.<sup>(157, 158)</sup>

312 Workplace absenteeism was used as a proxy depression measure in two reviews<sup>(162, 163)</sup>. One  
313 review<sup>(162)</sup> of workers with major depressive disorder or high levels of depressive symptoms  
314 reported that combining a work-directed intervention with a clinical intervention decreased  
315 sickness absences. In contrast, an earlier review<sup>(163)</sup> found insufficient evidence to determine  
316 effectiveness of workplace interventions on absenteeism in depressed employees due to high risk  
317 of bias and very low quality evidence. We did not find any reviews addressing stigma.



1  
2  
3 318 **Q10. Are there structural or functional changes in brains due to antidepressant therapy**  
4  
5 319 **during brain development (in children)?**  
6  
7

8 320 One narrative review<sup>(164)</sup> reported that research of the effects of antidepressant medication on  
9  
10 321 adolescent brain development was limited to animal models and treatment decisions were often  
11  
12 322 based on adult-specific studies. A prospective cohort study (n=15)<sup>(165)</sup> supported the use of  
13  
14 323 fluoxetine to achieve normal brain activity in adolescents with depression.  
15  
16  
17

18 324 **Q11. What is the role of the family in the treatment and trajectory of depression?**  
19  
20

21 325 Four reviews<sup>(74, 166-168)</sup> addressed populations where the main diagnosis was depression.  
22  
23 326 Three<sup>(166-168)</sup> of these reviews reported that interventions including one or more family members  
24  
25 327 led to improved depressive symptoms in the patient. The remaining review<sup>(74)</sup> found that while  
26  
27 328 family therapy appears to be more effective than no treatment, the certainty of its effectiveness is  
28  
29 329 unclear. Two<sup>(169, 170)</sup> additional reviews addressed changes in depressive symptoms through  
30  
31 330 family involvement where depression was an outcome of the primary disease diagnosis. For  
32  
33 331 cancer patients, couple-based interventions, particularly psychoeducation interventions, led to  
34  
35 332 significant improvements in patients' depression scores<sup>(170)</sup>, while family-orientated intervention  
36  
37 333 was effective at reducing depression in patients post-stroke<sup>(169)</sup>. Three reviews<sup>(166, 169, 170)</sup> also  
38  
39 334 reported the interventions benefited patients' families, with an improved quality of life for  
40  
41 335 caregivers including reduced depressive symptoms.  
42  
43  
44  
45  
46

47 336 **DISCUSSION**  
48  
49

50 337 An extensive volume of research relating to depression addresses, either in whole or in part, the  
51  
52 338 11 research questions that arose from the ADPSP. The extent of available research underscores  
53  
54  
55  
56

1  
2  
3 339 the importance of this mental health disorder and its far-reaching impact. This mapping of the  
4  
5 340 evidence provides a strong and critical foundation to guide future research and knowledge  
6  
7 341 translation opportunities. Among the patient-identified priorities, there are questions where  
8  
9 342 extensive evidence exists (i.e., hundreds of primary studies), yet uncertainties remain. It might be  
10  
11 343 tempting to conclude that ‘more research is needed’; however, a close examination of what is  
12  
13 344 known and what remains uncertain is critical to guide implementation of proven strategies and  
14  
15 345 judicious investment in future research efforts. For example, there is evidence supporting the  
16  
17 346 effectiveness of many non-pharmacological interventions (including psychological interventions  
18  
19 347 and exercise) to reduce depressive symptoms. However, targeted research is needed that  
20  
21 348 addresses comparative effectiveness of promising interventions, specific populations of interest  
22  
23 349 (e.g., children, minority groups), and adverse effects. Further, attention is needed to ensure  
24  
25 350 appropriate and rigorous methods, and explore innovative methodologies (e.g., real world  
26  
27 351 evidence, pragmatic trials, big data analytics, network meta-analysis) to make the most efficient  
28  
29 352 use of funds, existing research, and available data.  
30  
31  
32  
33  
34  
35

### 36 353 **Strengths**

37  
38  
39 354 From a service provision standpoint application of rapid response methods enabled our team to  
40  
41 355 provide the requestor with targeted evidence relating to their priorities. From a methods  
42  
43 356 perspective, our approach allowed for the expedited provision of results within a tight timeframe  
44  
45 357 while using transparent and reproducible methods. Lastly, the collaboration between our  
46  
47 358 knowledge synthesis team and the PSPP furthers the likelihood that future depression research  
48  
49 359 agendas represent the interests of both researchers and patients.  
50  
51  
52

### 53 360 **Challenges**

54  
55  
56  
57 Evidence for Patient-Identified Priorities in Depression Research  
58  
59  
60

1  
2  
3 361 We attempted to categorize the results of each rapid response as to whether further primary  
4  
5 362 research, evidence syntheses or knowledge translation was needed based on the JLA definition of  
6  
7 363 a treatment uncertainty. Verification of treatment uncertainties through JLA is based on the  
8  
9  
10 364 reported confidence interval of a recent systematic review or confirmation that a statistically  
11  
12 365 significant result is also clinically important<sup>(15)</sup>. The priorities identified by the ADPSP were not  
13  
14 366 all focused on treatment efficacy however, and we were unable to find guidance for other  
15  
16 367 research questions. The complexity of the questions also made it difficult to apply definitions of  
17  
18 368 uncertainty. The identified SRs also had multiple effect estimates within and across different  
19  
20 369 outcomes, comparisons, and populations. For example, 25 SRs relating to the exercise  
21  
22 370 component of question seven (diet, exercise and depression development) identified four specific  
23  
24 371 populations (teenagers, older adults, pregnant women, persons with chronic disease) and for  
25  
26 372 question three part a (cost advantages for non-pharmacological treatment options) there were 22  
27  
28 373 different cost comparisons across 18 studies examining 16 different therapies. In order to answer  
29  
30 374 whether treatment uncertainties exist, the question needed to be very specific with details on  
31  
32 375 population, intervention, comparison, and outcome. In addition, many of the questions had  
33  
34 376 multiple components; therefore, at times there was evidence for some but not all components.  
35  
36 377 For question seven, there was high quality evidence supporting exercise for preventing further  
37  
38 378 development of depression symptoms; however, there was very little evidence regarding diet.  
39  
40 379 The large volume of evidence also posed challenges. For example, question three, part c  
41  
42 380 (effectiveness of non-pharmacological interventions) identified 179 SRs; given our short timeline  
43  
44 381 it was necessary to include only the 27 SRs which mostly directly answered the research  
45  
46 382 question. An a-priori process for ranking or further categorizing large volumes of evidence is  
47  
48 383 recommended.

## 384 **Lessons learned**

385 The role of knowledge synthesis in PPSPs is currently not well defined. Detailed guidelines that  
386 outline how to balance efficiency and methodological rigour while determining the existing  
387 evidence base for a PPSP are needed. We recommend that knowledge synthesis experts be  
388 involved early in the PPSP process. Input into the survey may allow for more details of the  
389 populations, interventions, comparisons, and outcomes of interest by both the public and the  
390 steering committee leading to more specific and answerable research questions. Development of  
391 very focused questions will decrease the time needed for literature screening and aid in defining  
392 criteria to determine certainty of evidence or knowledge translation needs a priori. Focused  
393 questions are also more likely to be incorporated into a research agenda, a core PPSP goal.

## 394 **Limitations**

395 With limited rapid review methods guidance available in 2017, we adapted methods used by the  
396 Canadian Agency for Drugs and Technologies in Health (CADTH)<sup>(16)</sup> and scoping review  
397 methodology.<sup>(17)</sup> While the need for evidence in a short time frame directed our methods, our  
398 results should be interpreted in light of some limitations such as searching one database  
399 (PubMed), not including grey literature, and using a single experienced screener. According to  
400 scoping review methodology<sup>(17)</sup>, we did not conduct formal quality assessment, rather we  
401 reported author-identified limitations of the included studies.

## 402 **CONCLUSIONS**

403 Through 11 rapid responses, we identified an extensive body of evidence addressing patient  
404 identified priorities in depression research, and identified the strengths and limitations of existing

1  
2  
3 405 evidence, areas of uncertainty, and general directions for future research. This work can serve as  
4  
5 406 a strong foundation to guide future research and knowledge translation activities. Integrated  
6  
7 407 knowledge syntheses bring value to the PPSP process and help avoid duplication of research  
8  
9 408 effort. The role of knowledge synthesis in PPSPs is not well defined at present and categorizing  
10  
11 409 available evidence without focused questions or a priori criteria is challenging and may not  
12  
13 410 support all PPSPs particularly where the scope of priorities is broad.  
14  
15  
16  
17  
18 411

## 412 **FIGURE LEGENDS**

413  
414 **FIGURE 1. Alberta's Top 11 Patient-Identified Depression Research Priorities<sup>14</sup>**

415  
416 **FIGURE 2. Flow diagram of screening decisions**

417  
418 **ACKNOWLEDGEMENTS:** We would like to thank Samantha Guitard for assistance with  
419 formatting.

420 **AUTHOR'S CONTRIBUTION:** MS authored three of the rapid responses and was the main  
421 contributor to the manuscript. MG authored three of the rapid responses and had input into the  
422 manuscript. AG, MN and LMB each authored two of the rapid responses and had input into the  
423 manuscript. RF developed and ran all the search strategies for the rapid responses and  
424 contributed the searching sections of the manuscript. LB and PML led the ADPSP and PML  
425 collaborated in adaptation of the identified priorities into research questions. LH initiated this  
426 collaborative manuscript and contributed to the writing. All authors read, revised and approved  
427 the final version of the paper.

428 **COMPETING INTERESTS:** None declared.

429 **FUNDING STATEMENT:** This work was supported by the Alberta Strategy for Patient-  
430 Oriented Research SUPPORT Unit Knowledge Translation Program, which is funded by Alberta  
431 Innovates and the Canadian Institutes of Health Research, and the Alberta Research Centre for  
432 Health Evidence.

433 **DATA SHARING:** All data produced or analyzed in this study is included in the manuscript and  
434 its appendices.

435 **ETHICS APPROVAL AND CONSENT TO PARTICIPATE:** This work is combination of  
436 multiple rapid reviews of previously published data and therefore ethics approval is not required.

## 437 REFERENCES

- 438
- 439 1. World Health Organization. Depression and other common mental disorders: global health  
440 estimates. Geneva: World Health Organization 2017;1-24.
  - 441 2. Kessler RC, Bromet EJ. The epidemiology of depression across cultures. *Annu Rev Public*  
442 *Health* 2013;34:119-38.
  - 443 3. Evans-Lacko S, Knapp M. Global patterns of workplace productivity for people with  
444 depression: absenteeism and presenteeism costs across eight diverse countries.  
445 *Soc Psychiatry Psychiatr Epidemiol* 2016;51(11):1525-37.
  - 446 4. Bouwmans CAM, Vemer P, van Straten A, Tan SS, Hakkaart-van Roijen L. Health-related  
447 quality of life and productivity losses in patients with depression and anxiety disorders. *J*  
448 *Occup Environ Med* 2014;56(4):420-4.
  - 449 5. Sivertsen H, Bjorklof GH, Engedal K, Selbaek G, Helvik AS. Depression and quality of life in  
450 older persons: a review. *Dement Geriatr Cogn Disord* 2015;40(5-6):311-39.
  - 451 6. Lepine JP, Gastpar M, Mendlewicz J, Tylee A. Depression in the community: the first pan-  
452 European study DEPRES (Depression Research in European Society). *Int Clin*  
453 *Psychopharmacol* 1997;12(1):19-29.
  - 454 7. Crowe S, Fenton M, Hall M, Cowan K, Chalmers I. Patients', clinicians' and the research  
455 communities' priorities for treatment research: there is an important mismatch. *Res Involv*  
456 *Engagem* 2015;1:2.
  - 457 8. Canadian Institutes of Health Research. [Internet] Strategy for patient-oriented research.  
458 Government of Canada. [cited: April 26, 2018]. Available from: [http://www.cihr-](http://www.cihr-irsc.gc.ca/e/41204.html)  
459 [irsc.gc.ca/e/41204.html](http://www.cihr-irsc.gc.ca/e/41204.html)
  - 460 9. Patient-Centered Outcomes Research Institute. [Internet].[cited: April 26, 2018]. Available  
461 from:[www.pcori.org](http://www.pcori.org)
  - 462 10. James Lind Alliance. [Internet]. National Health Service. [cited: April 26, 2018]. Available  
463 from:[www.jla.nihr.ac.uk](http://www.jla.nihr.ac.uk)
  - 464 11. Tallon D, Chard J, Dieppe P. Relation between agendas of the research community and the  
465 research consumer. *Lancet* 2000;355(9220):2037-40.
  - 466 12. Alberta Innovates. [Internet] Alberta's top 11 priorities for depression research. Alberta  
467 Depression Research Priority Setting Project. [cited: April 26, 2018]. Available  
468 from:[https://albertainnovates.ca/our-health-innovation-focus/the-alberta-spor-support-](https://albertainnovates.ca/our-health-innovation-focus/the-alberta-spor-support-unit/patient-engagement-platform/alberta-depression-research-priority-setting-project/)  
469 [unit/patient-engagement-platform/alberta-depression-research-priority-setting-project/](https://albertainnovates.ca/our-health-innovation-focus/the-alberta-spor-support-unit/patient-engagement-platform/alberta-depression-research-priority-setting-project/)
  - 470 13. Breault L, Rittenbach K, Hartle K, et al. People with lived experience (PWLE) of depression:  
471 describing and reflecting on an explicit patient engagement process within depression  
472 research priority setting in Alberta, Canada. *Res Involv Engagem* 2018;16:5.
  - 473 14. Breault L, Rittenbach K, Hartle K, et al. A survey of priority setting for depression: eleven  
474 research questions asked by people with lived depression experience in Alberta. *CMAJ Open*  
475 2018;in press.
  - 476 15. Cowan K, Oliver S. [Internet]. James Lind Alliance guidebook. Southampton, UK: The  
477 James Lind Alliance; 2016. Available from:[www.jla.nihr.ac.uk](http://www.jla.nihr.ac.uk).
  - 478 16. Canadian Agency for Drugs and Technologies in Health. [Internet]. Rapid response summary  
479 with critical appraisal: process 2015; 1. Available  
480 from:[https://www.cadth.ca/sites/default/files/external\\_rr\\_12\\_12\\_5\\_process.pdf](https://www.cadth.ca/sites/default/files/external_rr_12_12_5_process.pdf).



- 1  
2  
3 481 17. The Joanna Briggs Institute. The Joanna Briggs Institute reviewers' manual: 2015 edition /  
4 482 supplement. Australia: The Joanna Briggs Institute. 2015. Available from:  
5 483 [www.joannabriggs.org](http://www.joannabriggs.org).
- 6 484 18. Farah WH, Alsawas M, Mainou M, Alahdab F, Farah MH, Ahmed AT, et al. Non-  
7 485 pharmacological treatment of depression: a systematic review and evidence map. *Evid Based*  
8 486 *Med* 2016;21(6):214-21.
- 9 487 19. Gartlehner G, Gaynes BN, Amick HR, et al. AHRQ comparative effectiveness reviews.  
10 488 Nonpharmacological versus pharmacological treatments for adult patients with major  
11 489 depressive disorder. Rockville (MD): Agency for Healthcare Research and Quality (US)  
12 490 2015.
- 13 491 20. Weitz ES, Hollon SD, Twisk J, et al. Baseline depression severity as moderator of depression  
14 492 outcomes between cognitive behavioral therapy vs pharmacotherapy: an individual patient  
15 493 data meta-analysis. *JAMA Psychiatry* 2015;72(11):1102-9.
- 16 494 21. Trivedi RB, Nieuwsma JA, Williams JW, Jr., Baker D. VA Evidence-based synthesis  
17 495 program reports. Evidence synthesis for determining the efficacy of psychotherapy for  
18 496 treatment resistant depression. Washington (DC): Department of Veterans Affairs (US) 2009.
- 19 497 22. Cox GR, Callahan P, Churchill R, et al. Psychological therapies versus antidepressant  
20 498 medication, alone and in combination for depression in children and adolescents. *Cochrane*  
21 499 *Database Syst Rev* 2014;(11):Cd008324.
- 22 500 23. Biesheuvel-Leliefeld KE, Kok GD, Bockting CL, et al. Effectiveness of psychological  
23 501 interventions in preventing recurrence of depressive disorder: meta-analysis and meta-  
24 502 regression. *J Affect Disord* 2015;174:400-10.
- 25 503 24. Guidi J, Fava GA, Fava M, Papakostas GI. Efficacy of the sequential integration of  
26 504 psychotherapy and pharmacotherapy in major depressive disorder: a preliminary meta-  
27 505 analysis. *Psychol Med* 2011;41(2):321-31.
- 28 506 25. Chiesa A, Serretti A. Mindfulness based cognitive therapy for psychiatric disorders: a  
29 507 systematic review and meta analysis. *Psychiatry Res* 2011;187(3):441-53.
- 30 508 26. Piet J, Hougaard E. The effect of mindfulness-based cognitive therapy for prevention of  
31 509 relapse in recurrent major depressive disorder: a systematic review and meta-analysis. *Clin*  
32 510 *Psychol Rev* 2011;31(6):1032-40.
- 33 511 27. Cox GR, Fisher CA, De Silva S, et al. Interventions for preventing relapse and recurrence of  
34 512 a depressive disorder in children and adolescents. *Cochrane Database Syst Rev*  
35 513 2012;11:Cd007504.
- 36 514 28. Wu Q, Qu W, Crowell MD, Hentz JG, Frey KA. Tricyclic antidepressant use and risk of  
37 515 fractures: a meta-analysis of cohort and case-control studies. *J Bone Miner Res*  
38 516 2013;28(4):753-63.
- 39 517 29. Wu Q, Liu J, Gallegos-Orozco JF, Hentz JG. Depression, fracture risk, and bone loss: a  
40 518 meta-analysis of cohort studies. *Osteoporos Int* 2010;21(10):1627-35.
- 41 519 30. Wu Q, Bencaz AF, Hentz JG, Crowell MD. Selective serotonin reuptake inhibitor treatment  
42 520 and risk of fractures: a meta-analysis of cohort and case-control studies. *Osteoporos Int*  
43 521 2012;23(1):365-75.
- 44 522 31. Gebara MA, Shea ML, Lipsey KL, et al. Depression, antidepressants, and bone health in  
45 523 older adults: a systematic review. *J Am Geriatr Soc* 2014;62(8):1434-41.

- 1  
2  
3 524 32. Eom CS, Lee HK, Ye S, Park SM, Cho KH. Use of selective serotonin reuptake inhibitors  
4 525 and risk of fracture: a systematic review and meta-analysis. *J Bone Miner Res*  
5 526 2012;27(5):1186-95.
- 6 527 33. Rotella F, Mannucci E. Depression as a risk factor for diabetes: a meta-analysis of  
7 528 longitudinal studies. *J Clin Psychiatry* 2013;74(1):31-7.
- 8 529 34. Correll CU, Detraux J, De Lepeleire J, De Hert M. Effects of antipsychotics, antidepressants  
9 530 and mood stabilizers on risk for physical diseases in people with schizophrenia, depression  
10 531 and bipolar disorder. *World Psychiatry* 2015;14(2):119-36.
- 11 532 35. Perez-Pinar M, Mathur R, Foguet Q, Ayis S, Robson J, Ayerbe L. Cardiovascular risk factors  
12 533 among patients with schizophrenia, bipolar, depressive, anxiety, and personality disorders.  
13 534 *Eur Psychiatry* 2016;35:8-15.
- 14 535 36. Rubin RR, Peyrot M, Gaussoin SA, et al. Four-year analysis of cardiovascular disease risk  
15 536 factors, depression symptoms, and antidepressant medicine use in the Look AHEAD (Action  
16 537 for Health in Diabetes) clinical trial of weight loss in diabetes. *Diabetes Care*  
17 538 2013;36(5):1088-94.
- 18 539 37. Pocha C, Knott A, Rector TS, Dieperink E. Are selective serotonin reuptake inhibitors  
19 540 associated with hepatocellular carcinoma in patients with hepatitis C? *J Clinical Psychiatry*  
20 541 2014;75(10):e1122-6.
- 21 542 38. Egede LE, Gebregziabher M, Walker RJ, Payne EH, Acierno R, Frueh BC. Trajectory of cost  
22 543 overtime after psychotherapy for depression in older veterans via telemedicine. *J Affect*  
23 544 *Disord* 2017;207:157-62.
- 24 545 39. Richards DA, Ekers D, McMillan D, et al. Cost and outcome of behavioural activation versus  
25 546 cognitive behavioural therapy for depression (COBRA): a randomised, controlled, non-  
26 547 inferiority trial. *Lancet* 2016;388(10047):871-80.
- 27 548 40. Andersen P, Toner P, Bland M, McMillan D. Effectiveness of transdiagnostic cognitive  
28 549 behaviour therapy for anxiety and depression in adults: a systematic review and meta-  
29 550 analysis. *Behav Cogn Psychother* 2016;44(6):673-90.
- 30 551 41. Bower P, Knowles S, Coventry PA, Rowland N. Counselling for mental health and  
31 552 psychosocial problems in primary care. *Cochrane Database Syst Rev* 2011(9):Cd001025.
- 32 553 42. Brown JS, Sellwood K, Beecham JK, et al. Outcome, costs and patient engagement for group  
33 554 and individual CBT for depression: a naturalistic clinical study. *Behav Cogn Psychother*  
34 555 2011;39(3):355-8.
- 35 556 43. Goodyer IM, Reynolds S, Barrett B, et al. Cognitive-behavioural therapy and short-term  
36 557 psychoanalytic psychotherapy versus brief psychosocial intervention in adolescents with  
37 558 unipolar major depression (IMPACT): a multicentre, pragmatic, observer-blind, randomised  
38 559 controlled trial. *Health Technol Assess (England)* 2017;21(12):1-94.
- 39 560 44. Hammond GC, Croudace TJ, Radhakrishnan M, Lafortune L, Watson A, McMillan-Shields  
40 561 F, et al. Comparative effectiveness of cognitive therapies delivered face-to-face or over the  
41 562 telephone: an observational study using propensity methods. *PLoS ONE* 2012;7(9):e42916.
- 42 563 45. Kafali N, Cook B, Canino G, Alegria M. Cost-effectiveness of a randomized trial to treat  
43 564 depression among Latinos. *J Ment Health Policy Econ* 2014;17(2):41-50.
- 44 565 46. Karyotaki E, Tordrup D, Buntrock C, Bertollini R, Cuijpers P. Economic evidence for the  
45 566 clinical management of major depressive disorder: a systematic review and quality appraisal  
46 567 of economic evaluations alongside randomised controlled trials. *Epidemiol Psychiatr Sci*  
47 568 2016:1-16.



- 1  
2  
3 569 47. Meuldijk D, Carlier IV, van Vliet IM, van Hemert AM, Zitman FG, van den Akker-van  
4 570 Marle ME. Economic evaluation of concise cognitive behavioural therapy and/or  
5 571 pharmacotherapy for depressive and anxiety disorders. *J Ment Health Policy Econ*  
6 572 2015;18(4):175-83.
- 8 573 48. Morrell CJ, Warner R, Slade P, et al. Psychological interventions for postnatal depression:  
9 574 cluster randomised trial and economic evaluation. The PoNDER trial. *Health Technol Assess*  
10 575 (England) 2009;13(30):iii-iv,xi-xiii,1-153.
- 11 576 49. Boudreau R, Moulton K, Cunningham J. Self-directed cognitive behavioural therapy for  
12 577 adults with diagnosis of depression: systematic review of clinical effectiveness, cost-  
13 578 effectiveness, and guidelines. *CADTH Technol Overv* 2010;1(4):e0125.
- 15 579 50. Romero-Sanchiz P, Nogueira-Arjona R, Garcia-Ruiz A, et al. Economic evaluation of a  
16 580 guided and unguided internet-based CBT intervention for major depression: results from a  
17 581 multi-center, three-armed randomized controlled trial conducted in primary care. *PLoS ONE*  
18 582 2017;12(2):e0172741.
- 19 583 51. Solomon D, Proudfoot J, Clarke J, Christensen H. e-CBT (myCompass), antidepressant  
20 584 medication, and face-to-face psychological treatment for depression in Australia: a cost-  
21 585 effectiveness comparison. *J Med Internet Res* 2015;17(11):e255.
- 23 586 52. Warmerdam L, Smit F, van Straten A, Riper H, Cuijpers P. Cost-utility and cost-  
24 587 effectiveness of internet-based treatment for adults with depressive symptoms: randomized  
25 588 trial. *J Med Internet Res* 2010;12(5):e53.
- 26 589 53. Berghout CC, Zevalkink J, Hakkaart-van Roijen L. A cost-utility analysis of psychoanalysis  
27 590 versus psychoanalytic psychotherapy. *Int J Technol Assess Health Care* 2010;26(1):3-10.
- 28 591 54. Dunn NJ, Rehm LP, Schillaci J, et al. A randomized trial of self-management and  
29 592 psychoeducational group therapies for comorbid chronic posttraumatic stress disorder and  
30 593 depressive disorder. *J Trauma Stress* 2007;20(3):221-37.
- 32 594 55. Maljanen T, Knekt P, Lindfors O, Virtala E, Tillman P, Harkanen T. The cost-effectiveness  
33 595 of short-term and long-term psychotherapy in the treatment of depressive and anxiety  
34 596 disorders during a 5-year follow-up. *J Affect Disord* 2016;190:254-63.
- 35 597 56. Gertler P, Tate RL, Cameron ID. Non-pharmacological interventions for depression in adults  
36 598 and children with traumatic brain injury. *Cochrane Database Syst Rev* 2015(12):Cd009871.
- 38 599 57. Shinohara K, Honyashiki M, Imai H, et al. Behavioural therapies versus other psychological  
39 600 therapies for depression. *Cochrane Database Syst Rev* 2013(10):Cd008696.
- 40 601 58. Egede LE, Acierno R, Knapp RG, et al. Psychotherapy for depression in older veterans via  
41 602 telemedicine: a randomised, open-label, non-inferiority trial. *Lancet Psychiatry*  
42 603 2015;2(8):693-701.
- 43 604 59. Merry SN, Stasiak K, Shepherd M, Frampton C, Fleming T, Lucassen MF. The effectiveness  
44 605 of SPARX, a computerised self help intervention for adolescents seeking help for depression:  
45 606 randomised controlled non-inferiority trial. *BMJ* 2012;344:e2598.
- 47 607 60. Berking M, Ebert D, Cuijpers P, Hofmann SG. Emotion regulation skills training enhances  
48 608 the efficacy of inpatient cognitive behavioral therapy for major depressive disorder: a  
49 609 randomized controlled trial. *Psychother Psychosom* 2013;82(4):234-45.
- 50 610 61. Goodyer IM, Reynolds S, Barrett B, et al. Cognitive behavioural therapy and short-term  
51 611 psychoanalytical psychotherapy versus a brief psychosocial intervention in adolescents with  
52 612 unipolar major depressive disorder (IMPACT): a multicentre, pragmatic, observer-blind,  
53 613 randomised controlled superiority trial. *Lancet Psychiatry* 2017;4(2):109-19.

- 1  
2  
3 614 62. Himelhoch S, Medoff D, Maxfield J, et al. Telephone based cognitive behavioral therapy  
4 615 targeting major depression among urban dwelling, low income people living with  
5 616 HIV/AIDS: results of a randomized controlled trial. *AIDS Behav* 2013;17(8):2756-64.
- 6 617 63. Andersson G, Cuijpers P, Carlbring P, Riper H, Hedman E. Guided internet-based vs. face-  
7 618 to-face cognitive behavior therapy for psychiatric and somatic disorders: a systematic review  
8 619 and meta-analysis. *World Psychiatry* 2014;13(3):288-95.
- 9 620 64. Barth J, Munder T, Gerger H, et al. Comparative efficacy of seven psychotherapeutic  
10 621 interventions for patients with depression: a network meta-analysis. *PLoS Med*  
11 622 2013;10(5):e1001454.
- 12 623 65. Braun SR, Gregor B, Tran US. Comparing bona fide psychotherapies of depression in adults  
13 624 with two meta-analytical approaches. *PLoS ONE* 2013;8(6):e68135.
- 14 625 66. Burlingame GM, Seebeck JD, Janis RA, et al. Outcome differences between individual and  
15 626 group formats when identical and nonidentical treatments, patients, and doses are compared:  
16 627 a 25-year meta-analytic perspective. *Psychotherapy (Chic)* 2016;53(4):446-61.
- 17 628 67. Cape J, Whittington C, Buszewicz M, Wallace P, Underwood L. Brief psychological  
18 629 therapies for anxiety and depression in primary care: meta-analysis and meta-regression.  
19 630 *BMC Med* 2010;8:38.
- 20 631 68. Cuijpers P, Andersson G, Donker T, van Straten A. Psychological treatment of depression:  
21 632 results of a series of meta-analyses. *Nord J Psychiatry* 2011;65(6):354-64.
- 22 633 69. Cuijpers P, Donker T, van Straten A, Li J, Andersson G. Is guided self-help as effective as  
23 634 face-to-face psychotherapy for depression and anxiety disorders? A systematic review and  
24 635 meta-analysis of comparative outcome studies. *Psychol Med* 2010;40(12):1943-57.
- 25 636 70. Cuijpers P, van Straten A, Andersson G, van Oppen P. Psychotherapy for depression in  
26 637 adults: a meta-analysis of comparative outcome studies. *J Consult Clin Psychol*  
27 638 2008;76(6):909-22.
- 28 639 71. Dedert E, McDuffie JR, Swinkels C, et al. VA evidence-based synthesis program reports.  
29 640 Computerized cognitive behavioral therapy for adults with depressive or anxiety disorders.  
30 641 Washington (DC): Department of Veterans Affairs (US); 2013.
- 31 642 72. Dennis CL, Hodnett E. Psychosocial and psychological interventions for treating postpartum  
32 643 depression. *Cochrane Database Syst Rev* 2007(4):Cd006116.
- 33 644 73. Hazell P. Depression in children and adolescents. *BMJ Clin Evid* 2011;1008.
- 34 645 74. Henken HT, Huibers MJ, Churchill R, Restifo K, Roelofs J. Family therapy for depression.  
35 646 *Cochrane Database Syst Rev* 2007(3):Cd006728.
- 36 647 75. Hunot V, Moore TH, Caldwell DM, et al. 'Third wave' cognitive and behavioural therapies  
37 648 versus other psychological therapies for depression. *Cochrane Database Syst Rev*  
38 649 2013(10):Cd008704.
- 39 650 76. Jakobsen JC, Hansen JL, Simonsen S, Simonsen E, Gluud C. Effects of cognitive therapy  
40 651 versus interpersonal psychotherapy in patients with major depressive disorder: a systematic  
41 652 review of randomized clinical trials with meta-analyses and trial sequential analyses. *Psychol*  
42 653 *Med* 2012;42(7):1343-57.
- 43 654 77. Jorm AF, Morgan AJ, Hetrick SE. Relaxation for depression. *Cochrane Database Syst Rev*  
44 655 2008(4):Cd007142.
- 45 656 78. Kriston L, von Wolff A, Westphal A, Holzel LP, Harter M. Efficacy and acceptability of  
46 657 acute treatments for persistent depressive disorder: a network meta-analysis. *Depress Anxiety*  
47 658 2014;31(8):621-30.

- 1  
2  
3 659 79. Linde K, Rucker G, Sigterman K, et al. Comparative effectiveness of psychological  
4 660 treatments for depressive disorders in primary care: network meta-analysis. *BMC Fam Pract*  
5 661 2015;16:103.  
6 662 80. Montgomery EC, Kunik ME, Wilson N, Stanley MA, Weiss B. Can paraprofessionals deliver  
7 663 cognitive-behavioral therapy to treat anxiety and depressive symptoms? *Bull Menninger Clin*  
8 664 2010;74(1):45-62.  
9 665 81. Nieuwenhuijsen K, Bultmann U, Neumeyer-Gromen A, Verhoeven AC, Verbeek JH, van der  
10 666 Feltz-Cornelis CM. Interventions to improve occupational health in depressed people.  
11 667 *Cochrane Database Syst Rev* 2008(2):Cd006237.  
12 668 82. Samad Z, Brealey S, Gilbody S. The effectiveness of behavioural therapy for the treatment of  
13 669 depression in older adults: a meta-analysis. *Int J Geriatr Psychiatry* 2011;26(12):1211-20.  
14 670 83. Spielmans GI, Pasek LF, McFall JP. What are the active ingredients in cognitive and  
15 671 behavioral psychotherapy for anxious and depressed children? A meta-analytic review. *Clin*  
16 672 *Psychol Rev* 2007;27(5):642-54.  
17 673 84. Steinert C, Munder T, Rabung S, Hoyer J, Leichsenring F. Psychodynamic therapy: as  
18 674 efficacious as other empirically supported treatments? A meta-analysis testing equivalence of  
19 675 outcomes. *Am J Psychiatry* 2017;174(10):943-53.  
20 676 85. Tolin DF. Is cognitive-behavioral therapy more effective than other therapies? A meta-  
21 677 analytic review. *Clin Psychol Rev* 2010;30(6):710-20.  
22 678 86. Wilson KC, Mottram PG, Vassilas CA. Psychotherapeutic treatments for older depressed  
23 679 people. *Cochrane Database Syst Rev* 2008(1):Cd004853.  
24 680 87. Zhou X, Hetrick SE, Cuijpers P, et al. Comparative efficacy and acceptability of  
25 681 psychotherapies for depression in children and adolescents: A systematic review and network  
26 682 meta-analysis. *World Psychiatry* 2015;14(2):207-22.  
27 683 88. Bennett K, Rhodes AE, Duda S, et al. A youth suicide prevention plan for Canada: A  
28 684 systematic review of reviews. *Can J Psychiatry* 2015;60(6):245-57.  
29 685 89. Das JK, Salam RA, Lassi ZS, et al. Interventions for adolescent mental health: an overview  
30 686 of systematic reviews. *J Adolesc Health* 2016;59(4s):S49-S60.  
31 687 90. Devenish B, Berk L, Lewis AJ. The treatment of suicidality in adolescents by psychosocial  
32 688 interventions for depression: a systematic literature review. *Aust N Z Psychiatry*  
33 689 2016;50(8):726-40.  
34 690 91. Hawton K, Witt KG, Taylor Salisbury TL, et al. Interventions for self-harm in children and  
35 691 adolescents. *Cochrane Database Syst Rev* 2015(12):Cd012013.  
36 692 92. Katz C, Bolton SL, Katz LY, Isaak C, Tilston-Jones T, Sareen J. A systematic review of  
37 693 school-based suicide prevention programs. *Depress Anxiety* 2013;30(10):1030-45.  
38 694 93. Perry Y, Werner-Seidler A, Calear AL, Christensen H. Web-based and mobile suicide  
39 695 prevention interventions for young people: a systematic review. *J Can Acad Child Adolesc*  
40 696 *Psychiatry* 2016;25(2):73-9.  
41 697 94. Pu J, Zhou X, Liu L, et al. Efficacy and acceptability of interpersonal psychotherapy for  
42 698 depression in adolescents: a meta-analysis of randomized controlled trials. *Psychiatry Res*  
43 699 2017;253:226-32.  
44 700 95. Townsend E, Walker DM, Sargeant S, et al. Systematic review and meta-analysis of  
45 701 interventions relevant for young offenders with mood disorders, anxiety disorders, or self-  
46 702 harm. *J Adolesc* 2010;33(1):9-20.

- 1  
2  
3 703 96. Cuijpers P, de Beurs DP, van Spijker BA, Berking M, Andersson G, Kerkhof AJ. The effects  
4 704 of psychotherapy for adult depression on suicidality and hopelessness: a systematic review  
5 705 and meta-analysis. *J Affect Disord* 2013;144(3):183-90.
- 6 706 97. Hawton K, Witt KG, Taylor Salisbury TL, et al. Psychosocial interventions following self-  
7 707 harm in adults: a systematic review and meta-analysis. *Lancet Psychiatry* 2016;3(8):740-50.
- 8 708 98. Hawton K, Witt KG, Taylor Salisbury TL, et al. Psychosocial interventions for self-harm in  
9 709 adults. *Cochrane Database Syst Rev* 2016(5):Cd012189.
- 10 710 99. Jakobsen JC, Hansen JL, Storebo OJ, Simonsen E, Gluud C. The effects of cognitive therapy  
11 711 versus 'no intervention' for major depressive disorder. *PloS ONE* 2011;6(12):e28299.
- 12 712 100. Lapiere S, Erlangsen A, Waern M, et al. A systematic review of elderly suicide prevention  
13 713 programs. *Crisis* 2011;32(2):88-98.
- 14 714 101. Okolie C, Dennis M, Simon Thomas E, John A. A systematic review of interventions to  
15 715 prevent suicidal behaviors and reduce suicidal ideation in older people. *Int Psychogeriatric*  
16 716 *2017;29(11):1801-24.*
- 17 717 102. Berrouiguet S, Baca-Garcia E, Brandt S, Walter M, Courtet P. Fundamentals for future  
18 718 mobile-health (mHealth): a systematic review of mobile phone and web-based text  
19 719 messaging in mental health. *J Med Internet Res* 2016;18(6):e135.
- 20 720 103. Fountoulakis KN, Gonda X, Siamouli M, Rihmer Z. Psychotherapeutic intervention and  
21 721 suicide risk reduction in bipolar disorder: a review of the evidence. *J Affect Disord*  
22 722 *2009;113(1-2):21-9.*
- 23 723 104. Meerwijk EL, Parekh A, Oquendo MA, Allen IE, Franck LS, Lee KA. Direct versus  
24 724 indirect psychosocial and behavioural interventions to prevent suicide and suicide attempts: a  
25 725 systematic review and meta-analysis. *Lancet Psychiatry* 2016;3(6):544-54.
- 26 726 105. O'Connor E, Gaynes BN, Burda BU, Soh C, Whitlock EP. Screening for and treatment of  
27 727 suicide risk relevant to primary care: a systematic review for the U.S. Preventive Services  
28 728 Task Force. *Ann Intern Med* 2013;158(10):741-54.
- 29 729 106. van der Feltz-Cornelis CM, Sarchiapone M, Postuvan V, et al. Best practice elements of  
30 730 multilevel suicide prevention strategies: a review of systematic reviews. *Crisis*  
31 731 *2011;32(6):319-33.*
- 32 732 107. Zalsman G, Hawton K, Wasserman D, et al. Suicide prevention strategies revisited: 10-year  
33 733 systematic review. *Lancet Psychiatry* 2016;3(7):646-59.
- 34 734 108. Lang UE, Beglinger C, Schweinfurth N, Walter M, Borgwardt S. Nutritional aspects of  
35 735 depression. *Cell Physiol Biochem* 2015;37(3):1029-43.
- 36 736 109. Williamson C. Dietary factors and depression in older people. *Br J Community Nurs*  
37 737 *2009;14(10):422,4-6.*
- 38 738 110. Chang SC, Cassidy A, Willett WC, Rimm EB, O'Reilly EJ, Okereke OI. Dietary flavonoid  
39 739 intake and risk of incident depression in midlife and older women. *Am J Clin Nutr*  
40 740 *2016;104(3):704-14.*
- 41 741 111. Chocano-Bedoya PO, O'Reilly EJ, Lucas M, et al. Prospective study on long-term dietary  
42 742 patterns and incident depression in middle-aged and older women. *Am J Clin Nutr*  
43 743 *2013;98(3):813-20.*
- 44 744 112. Colangelo LA, He K, Whooley MA, Daviglius ML, Liu K. Higher dietary intake of long-  
45 745 chain omega-3 polyunsaturated fatty acids is inversely associated with depressive symptoms  
46 746 in women. *Nutrition (California)* 2009;25(10):1011-9.



- 1  
2  
3 747 113. Gopinath B, Flood VM, Burlutksy G, Louie JC, Mitchell P. Association between  
4 748 carbohydrate nutrition and prevalence of depressive symptoms in older adults. *Br J Nutr*  
5 749 2016;116(12):2109-14.  
6  
7 750 114. Gougeon L, Payette H, Morais J, Gaudreau P, Shatenstein B, Gray-Donald K. Dietary  
8 751 patterns and incidence of depression in a cohort of community-dwelling older Canadians. *J*  
9 752 *Nutr Health Aging* 2015;19(4):431-6.  
10 753 115. Lehto SM, Ruusunen A, Tolmunen T, Voutilainen S, Tuomainen TP, Kauhanen J. Dietary  
11 754 zinc intake and the risk of depression in middle-aged men: a 20-year prospective follow-up  
12 755 study. *J Affect Disord* 2013;150(2):682-5.  
13 756 116. Li Y, Dai Q, Ekperi LI, Dehal A, Zhang J. Fish consumption and severely depressed mood,  
14 757 findings from the first national nutrition follow-up study. *Psychiatry Res* 2011;190(1):103-9.  
15 758 117. Lucas M, Mirzaei F, O'Reilly EJ, et al. Dietary intake of n-3 and n-6 fatty acids and the risk  
16 759 of clinical depression in women: a 10-y prospective follow-up study. *Am J Clin Nutr*  
17 760 2011;93(6):1337-43.  
18 761 118. Oddy WH, Hickling S, Smith MA, et al. Dietary intake of omega-3 fatty acids and risk of  
19 762 depressive symptoms in adolescents. *Depress Anxiety* 2011;28(7):582-8.  
20 763 119. Perez-Cornago A, Sanchez-Villegas A, Bes-Rastrollo M, et al. Relationship between  
21 764 adherence to Dietary Approaches to Stop Hypertension (DASH) diet indices and incidence of  
22 765 depression during up to 8 years of follow-up. *Public Health Nutr* 2016;20(13):1-10.  
23 766 120. Sanchez-Villegas A, Delgado-Rodriguez M, Alonso A, et al. Association of the  
24 767 Mediterranean dietary pattern with the incidence of depression: the Seguimiento Universidad  
25 768 de Navarra/University of Navarra follow-up (SUN) cohort. *Arch Gen Psychiatry*  
26 769 2009;66(10):1090-8.  
27 770 121. Sanchez-Villegas A, Henriquez-Sanchez P, Ruiz-Canela M, et al. A longitudinal analysis of  
28 771 diet quality scores and the risk of incident depression in the SUN Project. *BMC Med*  
29 772 2015;13:197.  
30 773 122. Sanchez-Villegas A, Verberne L, De Irala J, et al. Dietary fat intake and the risk of  
31 774 depression: the SUN Project. *PLoS ONE* 2011;6(1):e16268.  
32 775 123. Carter T, Morres ID, Meade O, Callaghan P. The Effect of exercise on depressive  
33 776 symptoms in adolescents: a systematic review and meta-analysis. *J Am Acad Child Adolesc*  
34 777 *Psychiatry* 2016;55(7):580-90.  
35 778 124. Cooney GM, Dwan K, Greig CA, et al. Exercise for depression. *Cochrane Database Syst*  
36 779 *Rev* 2013;(9):Cd004366.  
37 780 125. Danielsson L, Noras AM, Waern M, Carlsson J. Exercise in the treatment of major  
38 781 depression: a systematic review grading the quality of evidence. *Physiother Theory Pract*  
39 782 2013;29(8):573-85.  
40 783 126. de Souza Moura AM, Lamego MK, Paes F, et al. Comparison among aerobic exercise and  
41 784 other types of interventions to treat depression: a systematic review. *CNS Neurol Disord*  
42 785 *Drug Targets* 2015;14(9):1171-83.  
43 786 127. Garcia-Toro M, Ibarra O, Gili M, et al. Four hygienic-dietary recommendations as add-on  
44 787 treatment in depression: a randomized-controlled trial. *J Affect Disord* 2012;140(2):200-3.  
45 788 128. Gartlehner G, Gaynes BN, Amick HR, et al. Comparative benefits and harms of  
46 789 antidepressant, psychological, complementary, and exercise treatments for major depression:  
47 790 an evidence report for a clinical practice guideline from the American College of Physicians.  
48 791 *Ann Intern Med* 2016;164(5):331-41.

- 1  
2  
3 792 129. Hearing CM, Chang WC, Szuhany KL, Deckersbach T, Nierenberg AA, Sylvia LG.  
4 793 Physical exercise for treatment of mood disorders: a critical review. *Curr Behav Neurosci*  
5 794 *Rep* 2016;3(4):350-9.  
6  
7 795 130. Herring MP, Puetz TW, O'Connor PJ, Dishman RK. Effect of exercise training on  
8 796 depressive symptoms among patients with a chronic illness: a systematic review and meta-  
9 797 analysis of randomized controlled trials. *Arch Intern Med* 2012;172(2):101-11.  
10 798 131. Josefsson T, Lindwall M, Archer T. Physical exercise intervention in depressive disorders:  
11 799 meta-analysis and systematic review. *Scand J Med Sci Sports* 2014;24(2):259-72.  
12 800 132. Knapen J, Vancampfort D, Morien Y, Marchal Y. Exercise therapy improves both mental  
13 801 and physical health in patients with major depression. *Disabil Rehabil* 2015;37(16):1490-5.  
14 802 133. Kvam S, Kleppe CL, Nordhus IH, Hovland A. Exercise as a treatment for depression: a  
15 803 meta-analysis. *J Affect Disord* 2016;202:67-86.  
16 804 134. Meekums B, Karkou V, Nelson EA. Dance movement therapy for depression. *Cochrane*  
17 805 *Database Syst Rev* 2015;(2):Cd009895.  
18 806 135. Mura G, Carta MG. Physical activity in depressed elderly. A systematic review. *Clin Pract*  
19 807 *Epidemiol Ment Health* 2013;9:125-35.  
20 808 136. Mura G, Moro MF, Patten SB, Carta MG. Exercise as an add-on strategy for the treatment  
21 809 of major depressive disorder: a systematic review. *CNS Spectr* 2014;19(6):496-508.  
22 810 137. Netz Y. Is the comparison between exercise and pharmacologic treatment of depression in  
23 811 the clinical practice guideline of the American College of Physicians evidence-based? *Front*  
24 812 *Pharmacol* 2017;8:257.  
25 813 138. Park SC, Oh HS, Oh DH, et al. Evidence-based, non-pharmacological treatment guideline  
26 814 for depression in Korea. *J Korean Med Sci* 2014;29(1):12-22.  
27 815 139. Qaseem A, Barry MJ, Kansagara D. Nonpharmacologic versus pharmacologic treatment of  
28 816 adult patients with major depressive disorder: a clinical practice guideline from the American  
29 817 College of Physicians. *Ann Intern Med* 2016;164(5):350-9.  
30 818 140. Radovic S, Gordon MS, Melvin GA. Should we recommend exercise to adolescents with  
31 819 depressive symptoms? A meta-analysis. *J Paediatr Child Health* 2017;53(3):214-20.  
32 820 141. Ranjbar E, Memari AH, Hafizi S, Shayestehfar M, Mirfazeli FS, Eshghi MA. Depression  
33 821 and exercise: a clinical review and management guideline. *Asian J Sports Med*  
34 822 2015;6(2):e24055.  
35 823 142. Ravindran AV, da Silva TL. Complementary and alternative therapies as add-on to  
36 824 pharmacotherapy for mood and anxiety disorders: a systematic review. *J Affect Disord*  
37 825 2013;150(3):707-19.  
38 826 143. Ravindran AV, Lam RW, Filteau MJ, et al. Canadian Network for Mood and Anxiety  
39 827 Treatments (CANMAT) clinical guidelines for the management of major depressive disorder  
40 828 in adults. V. Complementary and alternative medicine treatments. *J Affect Disord*  
41 829 2009;117,1:S54-S64.  
42 830 144. Rethorst CD, Trivedi MH. Evidence-based recommendations for the prescription of  
43 831 exercise for major depressive disorder. *J Psychiatr Pract* 2013;19(3):204-12.  
44 832 145. Rhyner KT, Watts A. Exercise and depressive symptoms in older adults: a systematic meta-  
45 833 analytic review. *J Aging Phys Act* 2016;24(2):234-46.  
46 834 146. Schuch FB, Vancampfort D, Richards J, Rosenbaum S, Ward PB, Stubbs B. Exercise as a  
47 835 treatment for depression: a meta-analysis adjusting for publication bias. *J Psychiatr Res*  
48 836 2016b;77:42-51.

- 1  
2  
3 837 147. Schuch FB, Vancampfort D, Rosenbaum S, et al. Exercise for depression in older adults: a  
4 838 meta-analysis of randomized controlled trials adjusting for publication bias. *Rev Bras*  
5 839 *Psiquiatr* 2016a;38(3):247-54.
- 6 840 148. Serrano Ripoll MJ, Oliván-Blázquez B, Vicens-Pons E, et al. Lifestyle change  
7 841 recommendations in major depression: do they work? *J Affect Disord* 2015;183:221-8.
- 8 842 149. Shivakumar G, Brandon AR, Snell PG, et al. Antenatal depression: a rationale for studying  
9 843 exercise. *Depress Anxiety* 2011;28(3):234-42.
- 10 844 150. Goodman SH, Rouse MH, Connell AM, Broth MR, Hall CM, Heyward D. Maternal  
11 845 depression and child psychopathology: a meta-analytic review. *Clin Child Fam Psychol Rev*  
12 846 2011;14(1):1-27.
- 13 847 151. Sanger C, Iles JE, Andrew CS, Ramchandani PG. Associations between postnatal maternal  
14 848 depression and psychological outcomes in adolescent offspring: a systematic review. *Arch*  
15 849 *Womens Ment Health* 2015;18(2):147-62.
- 16 850 152. Sui G, Pan B, Liu G, Liu G, Wang L. The long-term effects of maternal postnatal  
17 851 depression on a child's intelligence quotient: a meta-analysis of prospective cohort studies  
18 852 based on 974 cases. *J Clin Psychiatry* 2016;77(11):e1474-e82.
- 19 853 153. Lampard AM, Franckle RL, Davison KK. Maternal depression and childhood obesity: a  
20 854 systematic review. *Prev Med* 2014;59:60-7.
- 21 855 154. Hendricks K, Liu J. Maternal depression and childhood aggression: literature review. *MCN*  
22 856 *Am J Matern Child Nurs* 2012;37(4):253-61.
- 23 857 155. Correia LL, Linhares MB. Maternal anxiety in the pre- and postnatal period: a literature  
24 858 review. *Rev Lat Am Enfermagem* 2007;15(4):677-83.
- 25 859 156. Waters CS, Hay DF, Simmonds JR, van Goozen SH. Antenatal depression and children's  
26 860 developmental outcomes: potential mechanisms and treatment options. *Eur Child Adolesc*  
27 861 *Psychiatry* 2014;23(10):957-71.
- 28 862 157. Joyce S, Modini M, Christensen H, et al. Workplace interventions for common mental  
29 863 disorders: a systematic meta-review. *Psychol Med* 2016;46(4):683-97.
- 30 864 158. Tan L, Wang MJ, Modini M, et al. Preventing the development of depression at work: a  
31 865 systematic review and meta-analysis of universal interventions in the workplace. *BMC Med*  
32 866 2014;12:74.
- 33 867 159. Chu AH, Koh D, Moy FM, Muller-Riemenschneider F. Do workplace physical activity  
34 868 interventions improve mental health outcomes? *Occup Med (Lond)* 2014;64(4):235-45.
- 35 869 160. Dietrich S, Deckert S, Ceynowa M, Hegerl U, Stengler K. Depression in the workplace: a  
36 870 systematic review of evidence-based prevention strategies. *Int Arch Occup Environ Health*  
37 871 2012;85(1):1-11.
- 38 872 161. Martin A, Sanderson K, Cocker F. Meta-analysis of the effects of health promotion  
39 873 intervention in the workplace on depression and anxiety symptoms. *Scand J Work Environ*  
40 874 *Health* 2009;35(1):7-18.
- 41 875 162. Nieuwenhuijsen K, Faber B, Verbeek JH, et al. Interventions to improve return to work in  
42 876 depressed people. *Cochrane Database Syst Rev* 2014;Dec 3(12):CD006237.
- 43 877 163. Furlan AD, Gnam WH, Carnide N, et al. Systematic review of intervention practices for  
44 878 depression in the workplace. *J Occup Rehabil* 2012;22(3):312-21.
- 45 879 164. Cousins L, Goodyer IM. Antidepressants and the adolescent brain. *J Psychopharmacol*  
46 880 *(England)* 2015;29(5):545-55.

- 1  
2  
3 881 165. Tao R. Brain activity in adolescent major depressive disorder before and after fluoxetine  
4 882 treatment. *Am J Psychiatry* 2012;169:381-8.  
5 883 166. Brady P, Kangas M, McGill K. "Family matters": a systematic review of the evidence for  
6 884 family psychoeducation for major depressive disorder. *J Marital Fam Ther* 2017;43(2):245-  
7 885 63.  
8 886 167. Meis LA, Griffin JM, Greer N, et al. Couple and family involvement in adult mental health  
9 887 treatment: a systematic review. *Clin Psychol Rev* 2013;33(2):275-86.  
10 888 168. Stahl ST, Rodakowski J, Saghafi EM, Park M, Reynolds CF, Dew MA. Systematic review  
11 889 of dyadic and family-oriented interventions for late-life depression. *Int J Geriatr Psychiatry*  
12 890 2016;31(9):963-73.  
13 891 169. Vallury KD, Jones M, Gray R. Do family-oriented interventions reduce poststroke  
14 892 depression? A systematic review and recommendations for practice. *Top Stroke Rehabil*  
15 893 2015;22(6):453-9.  
16 894 170. Wang F, Luo D, Fu L, et al. The efficacy of couple-based interventions on health-related  
17 895 quality of life in cancer patients and their spouses: a meta-analysis of 12 randomized  
18 896 controlled trials. *Cancer Nurs* 2017;40(1):39-47.



|                                                                                                                                                                                                              |                                                                                                                                                                                    |
|--------------------------------------------------------------------------------------------------------------------------------------------------------------------------------------------------------------|------------------------------------------------------------------------------------------------------------------------------------------------------------------------------------|
| 1. Which treatment therapy or method is more successful for long term remission or recovery?                                                                                                                 | 7. Can diet or exercise affect the development of depression?                                                                                                                      |
| 2. What are the long term physical implications of pharmacotherapy for treating depression?                                                                                                                  | 8. What are the functional, social, intellectual, physical and psychological problems experienced by children and teens living with an immediate family member who has depression? |
| 3. For various treatment options (e.g. psychotherapy, individual vs. group psychotherapy and psychosocial support), what are the advantages in terms of cost, effectiveness, relapse, prevention and safety? | 9. What interventions are effective in preventing and treating workplace depression and reducing stigma associated with depression in the workplace?                               |
| 4. What are the prevention strategies/tactics for reducing self-harm and suicide in children, youth and adults with depression?                                                                              | 10. Are there structural or functional changes in the brain due to antidepressant therapy during brain development?                                                                |
| 5. What changes to the health care system will increase access to psychological services?                                                                                                                    | 11. What is the role of family in the treatment and trajectory of depression?                                                                                                      |
| 6. What changes in the health care system will result in shortened wait times for depression services?                                                                                                       |                                                                                                                                                                                    |

FIGURE 1. Alberta's Top 11 Patient-Identified Depression Research Priorities<sup>14</sup>

144x66mm (300 x 300 DPI)

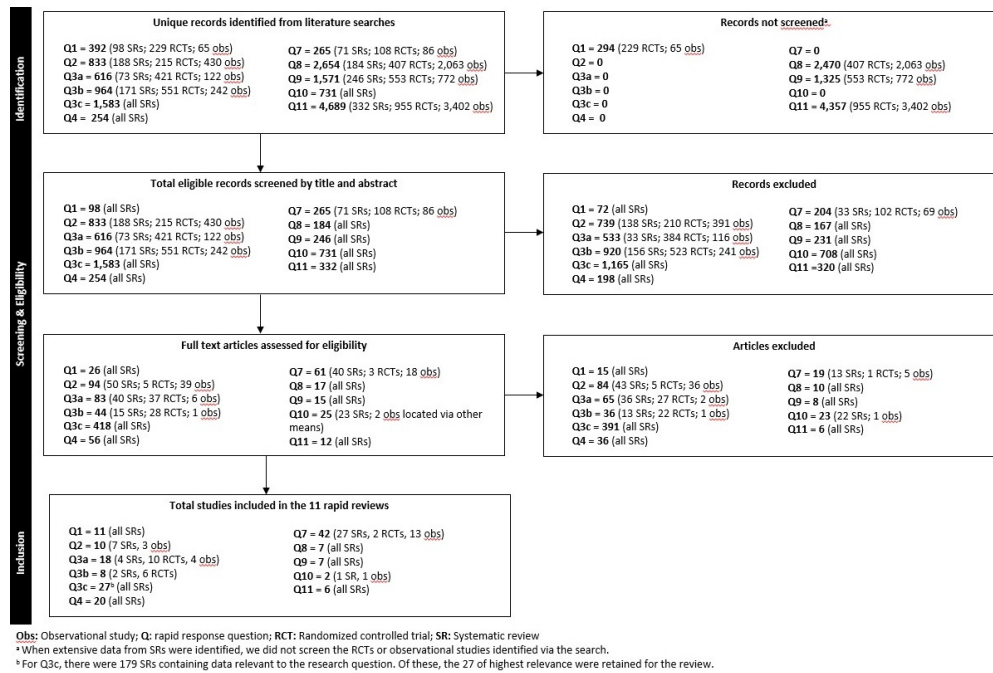

FIGURE 2. Flow diagram of screening decisions

101x68mm (300 x 300 DPI)

## APPENDIX 1: SEARCH STRATEGIES

### Depression Research Priority #: 1

**Priority:** Which treatment therapy or method is more successful for long term remission or recovery?

**Suggested review question (reviewer generated):** For patients with diagnosed depression, do pharmacotherapies (e.g., SSRIs) result in long term recovery/remission (e.g., cessation of drug therapy) compared with psychotherapy (e.g., CBT)?

**Date conducted:** 27 July 2017

**Database:** PubMed via NCBI Entrez (1946- )

**Records Retrieved:** 390

#### Strategy:

#1 Search ("Bipolar and Related Disorders"[Mesh] OR "Depression"[Mesh] OR "Depressive Disorder"[Mesh] OR "Mood Disorders"[Mesh:NoExp] OR affective disorder[tiab] OR affective disorders[tiab] OR bipolar[tiab] OR depression[tiab] OR depressive[tiab] OR depressives[tiab] OR manic disorder[tiab] OR manic disorders[tiab] OR mood disorder[tiab] OR mood disorders[tiab])

#2 Search ("Adrenergic Uptake Inhibitors"[Mesh] OR "Antidepressive Agents"[Mesh] OR "Bipolar and Related Disorders/drug therapy"[Mesh] OR "Depression/drug therapy"[Mesh] OR "Depressive Disorder/drug therapy"[Mesh] OR Fluvoxamine[Mesh] OR "Monoamine Oxidase Inhibitors"[Mesh] OR "Mood Disorders/drug therapy"[Mesh:NoExp] OR "Serotonin and Noradrenaline Reuptake Inhibitors"[Mesh] OR "Serotonin Uptake Inhibitors"[Mesh] OR anti-depressant[tiab] OR anti-depressants[tiab] OR anti-depressive agent[tiab] OR anti-depressive agents[tiab] OR antidepressant[tiab] OR antidepressants[tiab] OR antidepressive agent[tiab] OR antidepressive agents[tiab] OR fluvoxamine[tiab] OR MAOIs[tiab] OR monoamine oxidase inhibitors[tiab] OR serotonin reuptake inhibitor[tiab] OR serotonin reuptake inhibitors[tiab] OR SNRI[tiab] OR SNRIs[tiab] OR SSRI[tiab] OR SSRIs[tiab])

#3 Search ("Psychotherapy"[Mesh] OR behavioral therapy[tiab] OR behavioral therapies[tiab] OR behavioural therapy[tiab] OR behavioural therapies[tiab] OR CBT[tiab] OR cognitive therapy[tiab] OR cognitive therapies[tiab] OR group therapy[tiab] OR interpersonal therapy[tiab] OR interpersonal therapies[tiab] OR mindfulness[tiab] OR psycho-therapy[tiab] OR psycho-therapies[tiab] OR psychodynamic therapy[tiab] OR psychodynamic therapies[tiab] OR psychological therapy[tiab] OR psychological therapies[tiab] OR psychotherapy[tiab] OR psychotherapies[tiab] OR talk therapy[tiab])

#4 Search ("Convalescence"[Mesh] OR "Disease-Free Survival"[Mesh] OR "Recovery of Function"[Mesh] OR "Remission Induction"[Mesh:NoExp] recover[tiab] OR recovers[tiab] OR recovered[tiab] OR recovery[tiab] OR remission[tiab] OR (successful[tiab] AND (treatment[tiab] OR treatments[tiab] OR therapy[tiab] OR therapies[tiab])))

#5 Search #1 AND #2 AND #3 AND #4

#6 Search editorial[pt] OR comment[pt] OR letter[pt] OR newspaper article[pt]

#7 Search #5 NOT #6

1  
2  
3 #8 Search #7 AND *Systematic review filter*<sup>1</sup>: Publication date from 2007/01/01 to 2017/12/31;  
4 English

5  
6 #9 Search #7 AND *Randomized controlled trial filter*<sup>1</sup>: Publication date from 2007/01/01 to  
7 2017/12/31; English

8  
9 #10 Search #7 AND *Observational studies filter*<sup>1</sup>: Publication date from 2007/01/01 to  
10 2017/12/31; English  
11  
12  
13  
14  
15  
16  
17  
18  
19  
20  
21  
22  
23  
24  
25  
26  
27  
28  
29  
30  
31  
32  
33  
34  
35  
36  
37  
38  
39  
40  
41  
42  
43  
44  
45  
46  
47  
48  
49  
50  
51  
52

53  
54 <sup>1</sup> Strings attached: CADTH database search filters [Internet]. Ottawa: CADTH; 2016. [cited 2018 Jan 26]. Available  
55 from: <https://www.cadth.ca/resources/finding-evidence/>

**Depression Research Priority #: 2**

**Priority:** What are the long term physical implications of pharmacotherapy for treating depression?

**Suggested research question (reviewer generated):** Does pharmacotherapy (antidepressants) for patients with diagnosed depression adversely impact long term physiological development?

**Date conducted:** 22 August 2017

**Database:** PubMed via NCBI Entrez (1946- )

**Records Retrieved:** 835

**Strategy:**

#1 Search ("Bipolar and Related Disorders"[Mesh] OR "Depression"[Mesh] OR "Depressive Disorder"[Mesh] OR "Mood Disorders"[Mesh:NoExp] OR affective disorder[tiab] OR affective disorders[tiab] OR bipolar[tiab] OR depression[tiab] OR depressive[tiab] OR depressives[tiab] OR manic disorder[tiab] OR manic disorders[tiab] OR mood disorder[tiab] OR mood disorders[tiab])

#2 Search "Antidepressive Agents/adverse effects"[Mesh] OR "Antidepressive Agents/contraindications"[Mesh] OR "Antidepressive Agents/poisoning"[Mesh] OR "Antidepressive Agents/toxicity"[Mesh] OR "Serotonin Syndrome"[Mesh] OR "Serotonin Uptake Inhibitors/adverse effects"[Mesh] OR "Serotonin Uptake Inhibitors/contraindications"[Mesh] OR "Serotonin Uptake Inhibitors/poisoning"[Mesh] OR "Serotonin Uptake Inhibitors/toxicity"[Mesh] OR ("Antidepressive Agents"[Mesh] OR "Serotonin Uptake Inhibitors"[Mesh] OR anti-depressant[tiab] OR anti-depressants[tiab] OR anti-depressive agent[tiab] OR anti-depressive agents[tiab] OR antidepressant[tiab] OR antidepressants[tiab] OR antidepressive agent[tiab] OR antidepressive agents[tiab] OR serotonin reuptake inhibitor[tiab] OR serotonin reuptake inhibitors[tiab] OR SSRI[tiab] OR SSRIs[tiab]) AND ("Abnormalities, Drug-Induced"[Mesh] OR "Drug Recalls"[Mesh] OR "Drug-Related Side Effects and Adverse Reactions"[Mesh:NoExp] OR "Product Surveillance, Postmarketing"[Mesh] OR "Safety-Based Drug Withdrawals"[Mesh] OR adverse[ti] OR ((adverse[tiab] OR harm[tiab] OR harmed[tiab] OR harmful[tiab] OR harms[tiab] OR injurious[tiab] OR serious[tiab] OR toxic[tiab] OR undesirable[tiab]) AND (effect[tiab] OR effects[tiab] OR event[tiab] OR events[tiab] OR outcome[tiab] OR outcomes[tiab] OR incident[tiab] OR incidents[tiab] OR reaction[tiab] OR reactions[tiab])) OR adversely[ti] OR chemically induced[tiab] OR complication[tiab] OR complications[tiab] OR drug induced[tiab] OR harm[ti] OR harmed[ti] OR harmful[ti] OR harms[ti] OR injurious[ti] OR poison[tiab] OR poisonous[tiab] OR reaction[ti] OR reactions[ti] OR recalled[tiab] OR recall[tiab] OR recalls[tiab] OR risk[tiab] OR risks[tiab] OR safe[tiab] OR safety[tiab] OR side effect[tiab] OR side effects[tiab] OR toxic[tiab] OR toxicities[tiab] OR toxicity[tiab] OR toxicologic[tiab] OR toxicological[tiab] OR toxicologically[tiab] OR toxicology[tiab] OR undesirable[tiab] OR unsafe[tiab] OR warning[tiab] OR warnings[ti] OR withdrawal[tiab] OR withdrawals[tiab] OR withdrawn[tiab]))

#3 Search "Connective Tissue Cells"[Mesh] OR "Growth and Development"[Mesh:NoExp] OR "Growth"[Mesh] OR "Human Development"[Mesh] OR "Musculoskeletal Physiological Phenomena"[Mesh:NoExp] OR "Musculoskeletal Development"[Mesh] OR "Musculoskeletal System"[Mesh] OR bone[tiab] OR bones[tiab] OR cartilage[tiab] OR cell[tiab] OR cells[tiab] OR cellular[tiab] OR ((delay[tiab] OR delays[tiab] OR develop[tiab] OR developed[tiab] OR developing[tiab] OR development[tiab] OR developmental[tiab] OR impair[tiab] OR impaired[tiab] OR impairment[tiab] OR impairments[tiab] OR impairs[tiab]) AND (function[tiab] OR functional[tiab] OR functioning[tiab] OR functions[tiab] OR physical[tiab] OR

3

Appendix 1 - Evidence for Patient-Identified Priorities in Depression Research

1  
2  
3 physically[tiab] OR physiological[tiab])) OR grow[tiab] OR growth[tiab] OR fiber[tiab] OR  
4 fibers[tiab] OR fibre[tiab] OR fibres[tiab] OR ligament[tiab] OR ligaments[tiab] OR muscle[tiab]  
5 OR muscles[tiab] OR muscular[tiab] OR musculoskeletal[tiab] OR myogenesis[tiab] OR  
6 skeletal[tiab] OR tendon[tiab] OR tendons[tiab] OR tissue[tiab] OR tissues[tiab]  
7

8 #4 Search #1 AND #2 AND #3  
9

10 #5 Search editorial[pt] OR comment[pt] OR letter[pt] OR newspaper article[pt]  
11

12 #6 Search #4 NOT #5  
13

14 #7 Search #6 AND *Systematic review filter*. Publication date from 2007/01/01 to 2017/12/31;  
15 English  
16

17 #8 Search #6 AND *Randomized controlled trial filter*. Publication date from 2007/01/01 to  
18 2017/12/31; English  
19

20 #9 Search #6 AND *Observational studies filter*. Publication date from 2007/01/01 to  
21 2017/12/31; English  
22  
23  
24  
25  
26  
27  
28  
29  
30  
31  
32  
33  
34  
35  
36  
37  
38  
39  
40  
41  
42  
43  
44  
45  
46  
47  
48  
49  
50  
51  
52  
53  
54  
55  
56

**Depression Research Priority #: 3a**

**Priority:** For various treatment options (eg. psychotherapy, individual vs. group psychotherapy and psychosocial support), what are the advantages in terms of cost?

**Suggested question (reviewer generated):** How cost-effective are psychological therapies for depression?

**Date conducted:** 25 August 2017

**Database:** PubMed via NCBI Entrez (1946- )

**Records Retrieved:** 615

**Strategy:**

#1 Search ("Bipolar and Related Disorders"[Mesh] OR "Depression"[Mesh] OR "Depressive Disorder"[Mesh] OR "Mood Disorders"[Mesh:NoExp] OR affective disorder[tiab] OR affective disorders[tiab] OR bipolar[tiab] OR depression[tiab] OR depressive[tiab] OR depressives[tiab] OR manic disorder[tiab] OR manic disorders[tiab] OR mood disorder[tiab] OR mood disorders[tiab])

#2 Search ("Psychotherapy"[Mesh] OR behavioral therapy[tiab] OR behavioral therapies[tiab] OR behavioural therapy[tiab] OR behavioural therapies[tiab] OR CBT[tiab] OR cognitive therapy[tiab] OR cognitive therapies[tiab] OR group therapy[tiab] OR interpersonal therapy[tiab] OR interpersonal therapies[tiab] OR mindfulness[tiab] OR psycho-therapy[tiab] OR psycho-therapies[tiab] OR psychodynamic therapy[tiab] OR psychodynamic therapies[tiab] OR psychological therapy[tiab] OR psychological therapies[tiab] OR psychotherapy[tiab] OR psychotherapies[tiab] OR talk therapy[tiab])

#3 Search #1 AND #2

#4 Search #3 AND *Economics filter*

#5 Search editorial[pt] OR comment[pt] OR letter[pt] OR newspaper article[pt]

#6 Search #4 NOT #5

#7 Search #6 AND *Systematic review filter*. Publication date from 2007/01/01 to 2017/12/31; English

#8 Search #6 AND *Randomized controlled trial filter*. Publication date from 2007/01/01 to 2017/12/31; English

#9 Search #6 AND *Observational studies filter*. Publication date from 2007/01/01 to 2017/12/31; English



**Depression Research Priority #: 3b**

**Priority:** For various treatment options (eg. psychotherapy, individual vs. group psychotherapy and psychosocial support), what are the advantages in terms of safety?

**Suggested question (reviewer generated):** What are the harms associated with psychological therapies for depression?

**Date conducted:** 29 August 2017

**Database:** PubMed via NCBI Entrez (1946- )

**Records Retrieved:** 964

**Strategy:**

#1 Search "Bipolar and Related Disorders"[Mesh] OR "Depression"[Mesh] OR "Depressive Disorder"[Mesh] OR "Mood Disorders"[Mesh:NoExp] OR affective disorder[tiab] OR affective disorders[tiab] OR bipolar[tiab] OR depression[tiab] OR depressive[tiab] OR depressives[tiab] OR manic disorder[tiab] OR manic disorders[tiab] OR mood disorder[tiab] OR mood disorders[tiab]

#2 Search "Psychotherapy/adverse effects"[Mesh] OR (("Psychotherapy"[Majr] OR behavioral therapy[ti] OR behavioral therapies[ti] OR behavioural therapy[ti] OR behavioural therapies[ti] OR CBT[ti] OR cognitive therapy[ti] OR cognitive therapies[ti] OR group therapy[ti] OR interpersonal therapy[ti] OR interpersonal therapies[ti] OR mindfulness[ti] OR psychotherapy[ti] OR psycho-therapies[ti] OR psychodynamic therapy[ti] OR psychodynamic therapies[ti] OR psychological therapy[ti] OR psychological therapies[ti] OR psychotherapy[ti] OR psychotherapies[ti] OR talk therapy[ti]) AND ("Patient Harm"[Mesh] OR adverse[ti] OR ((adverse[tiab] OR harm[tiab] OR harmed[tiab] OR harmful[tiab] OR harms[tiab] OR injurious[tiab] OR negative[tiab] OR serious[tiab] OR undesirable[tiab]) AND (effect[tiab] OR effects[tiab] OR event[tiab] OR events[tiab] OR outcome[tiab] OR outcomes[tiab] OR incident[tiab] OR incidents[tiab] OR response[tiab] OR responses[tiab]))) OR adversely[ti] OR drop out[ti] OR drop outs[ti] OR dropout[ti] OR dropouts[ti] OR harm[ti] OR harmed[ti] OR harmful[ti] OR harms[ti] OR injurious[ti] OR risk[ti] OR risks[ti] OR safe[ti] OR safety[ti] OR undesirable[ti] OR unsafe[ti] OR warning[ti] OR warnings[ti]))

#3 Search #1 AND #2

#4 Search editorial[pt] OR comment[pt] OR letter[pt] OR newspaper article[pt]

#5 Search #3 NOT #4

#6 Search #5 AND *Systematic review filter*: Publication date from 2007/01/01 to 2017/12/31; English

#7 Search #5 AND *Randomized controlled trial filter*: Publication date from 2007/01/01 to 2017/12/31; English

#8 Search #5 AND *Observational studies filter*: Publication date from 2007/01/01 to 2017/12/31; English



**Depression Research Priority #: 3c**

**Priority:** For various treatment options (eg. Psychotherapy, individual vs. group psychotherapy and psychosocial support), what are the advantages in terms of effectiveness and relapse prevention?

**Suggested question (reviewer generated):** How effective are psychological therapies for depression?

**Date conducted:** 7 September 2017

**Database:** PubMed via NCBI Entrez (1946- )

**Records Retrieved:** 1589

**Strategy:**

#1 Search "Bipolar and Related Disorders"[Mesh] OR "Depression"[Mesh] OR "Depressive Disorder"[Mesh] OR "Mood Disorders"[Mesh:NoExp] OR affective disorder[tiab] OR affective disorders[tiab] OR bipolar[tiab] OR depression[tiab] OR depressive[tiab] OR depressives[tiab] OR manic disorder[tiab] OR manic disorders[tiab] OR mood disorder[tiab] OR mood disorders[tiab]

#2 Search ("Psychotherapy"[Mesh] OR behavioral therapy[tiab] OR behavioral therapies[tiab] OR behavioural therapy[tiab] OR behavioural therapies[tiab] OR CBT[tiab] OR cognitive therapy[tiab] OR cognitive therapies[tiab] OR group therapy[tiab] OR interpersonal therapy[tiab] OR interpersonal therapies[tiab] OR mindfulness[tiab] OR psycho-therapy[tiab] OR psycho-therapies[tiab] OR psychodynamic therapy[tiab] OR psychodynamic therapies[tiab] OR psychological therapy[tiab] OR psychological therapies[tiab] OR psychotherapy[tiab] OR psychotherapies[tiab] OR talk therapy[tiab])

#3 Search #1 AND #2

#4 Search editorial[pt] OR comment[pt] OR letter[pt] OR newspaper article[pt]

#5 Search #3 NOT #4

#6 Search #5 AND *Systematic review filter*. Publication date from 2007/01/01 to 2017/12/31; English

**Depression Research Priority #: 4**

**Priority:** What are the prevention strategies/tactics for reducing self-harm and suicide in children, youth and adults with depression?

**Suggested question (reviewer generated):** What are effective suicide and self-harm prevention interventions for patients with diagnosed depression?

**Date conducted:** 26 September 2017

**Database:** PubMed via NCBI Entrez (1946- )

**Records Retrieved:** 254

**Strategy:**

#1 Search "Bipolar and Related Disorders"[Mesh] OR "Depression"[Mesh] OR "Depressive Disorder"[Mesh] OR "Mood Disorders"[Mesh:NoExp] OR affective disorder[tiab] OR affective disorders[tiab] OR bipolar[tiab] OR depression[tiab] OR depressive[tiab] OR depressives[tiab] OR manic disorder[tiab] OR manic disorders[tiab] OR mood disorder[tiab] OR mood disorders[tiab]

#2 Search "Self-Injurious Behavior/prevention and control"[Mesh:NoExp] OR "Self Mutilation/prevention and control"[Mesh] OR "Suicide/prevention and control"[Mesh:NoExp] OR "Suicide, Attempted/prevention and control"[Mesh] OR ((self harm[tiab] OR self injurious[tiab] OR self injury[tiab] OR suicidal[tiab] OR suicide[tiab] OR suicides[tiab]) AND (deter[tiab] OR detered[tiab] OR deterrence[tiab] OR prevent[tiab] OR prevented[tiab] OR prevention[tiab] OR prevents[tiab] OR reduce[tiab] OR reduced[tiab] OR reduces[tiab] OR reduction[tiab] OR reductions[tiab]))

#3 Search #1 AND #2

#4 Search editorial[pt] OR comment[pt] OR letter[pt] OR newspaper article[pt]

#5 Search #3 NOT #4

#6 Search #5 AND *Systematic review filter*. Publication date from 2007/01/01 to 2017/12/31; English

**Depression Research Priority #: 7****Priority:** Can diet or exercise affect the development of depression?**Suggested question (reviewer generated):** For patients with diagnosed depression, are diet or exercise comparatively effective as pharmacotherapy (antidepressants) for managing symptoms and improving patient quality of life?**Date conducted:** 1 August 2017**Database:** PubMed via NCBI Entrez (1946- )**Records Retrieved:** 265**Strategy:**

#1 Search "Bipolar and Related Disorders"[Mesh] OR "Depression"[Mesh] OR "Depressive Disorder"[Mesh] OR "Mood Disorders"[Mesh:NoExp] OR affective disorder[tiab] OR affective disorders[tiab] OR bipolar[tiab] OR depression[tiab] OR depressive[tiab] OR depressives[tiab] OR manic disorder[tiab] OR manic disorders[tiab] OR mood disorder[tiab] OR mood disorders[tiab]

#2 Search "Bipolar and Related Disorders/diet therapy"[Majr] OR "Depression/diet therapy"[Majr] OR "Depressive Disorder/diet therapy"[Majr] OR "Diet Therapy"[Mesh] OR "Exercise"[Mesh] OR "Exercise Movement Techniques"[Mesh] OR "Exercise Therapy"[Mesh] OR "Mood Disorders/diet therapy"[Majr:NoExp] OR "Physical Fitness"[Mesh] OR diet[ti] OR dietary[ti] OR exercise[ti] OR physical activity[ti] OR physical therapy[ti]

#3 Search "Adrenergic Uptake Inhibitors"[Mesh] OR "Antidepressive Agents"[Mesh] OR "Bipolar and Related Disorders/drug therapy"[Mesh] OR "Depression/drug therapy"[Mesh] OR "Depressive Disorder/drug therapy"[Mesh] OR Fluvoxamine[Mesh] OR "Monoamine Oxidase Inhibitors"[Mesh] OR "Mood Disorders/drug therapy"[Mesh:NoExp] OR "Serotonin and Noradrenaline Reuptake Inhibitors"[Mesh] OR "Serotonin Uptake Inhibitors"[Mesh] OR anti-depressant[tiab] OR anti-depressants[tiab] OR anti-depressive agent[tiab] OR anti-depressive agents[tiab] OR antidepressant[tiab] OR antidepressants[tiab] OR antidepressive agent[tiab] OR antidepressive agents[tiab] OR fluvoxamine[tiab] OR MAOIs[tiab] OR monoamine oxidase inhibitors[tiab] OR serotonin reuptake inhibitor[tiab] OR serotonin reuptake inhibitors[tiab] OR SNRI[tiab] OR SNRIs[tiab] OR SSRI[tiab] OR SSRIs[tiab]

#4 Search #1 AND #2 AND #3

#5 Search editorial[pt] OR comment[pt] OR letter[pt] OR newspaper article[pt]

#6 Search #4 NOT #5

#7 Search #6 AND *Systematic review filter*: Publication date from 2007/01/01 to 2017/12/31; English

#8 Search #6 AND *Randomized controlled trial filter*: Publication date from 2007/01/01 to 2017/12/31; English

#9 Search #6 AND *Observational studies filter*: Publication date from 2007/01/01 to 2017/12/31; English

**Depression Research Priority #: 8**

**Priority:** What are the functional, social, intellectual, physical and psychological problems experience by children and teens living with an immediate family member who has depression?

**Suggested question (reviewer generated):** For children and adolescents, what are the harms associated with living with a family member with diagnosed depression?

**Date conducted:** 5 August 2017

**Database:** PubMed via NCBI Entrez (1946- )

**Records Retrieved:** 2654

**Strategy:**

#1 Search "Bipolar and Related Disorders"[Mesh] OR "Depression"[Mesh] OR "Depressive Disorder"[Mesh] OR "Mood Disorders"[Mesh:NoExp] OR affective disorder[tiab] OR affective disorders[tiab] OR bipolar[tiab] OR depression[tiab] OR depressive[tiab] OR depressives[tiab] OR manic disorder[tiab] OR manic disorders[tiab] OR mood disorder[tiab] OR mood disorders[tiab]

#2 Search "Adolescent"[Mesh] OR "Child"[Mesh] OR "Minors"[Mesh] OR adolescence[tiab] OR adolescent[tiab] OR adolescents[tiab] OR child[tiab] OR childhood[tiab] OR children[tiab] OR childrens[tiab] OR childs[tiab] OR preschooler[tiab] OR preschoolers[tiab] OR teen[tiab] OR teenaged[tiab] OR teenager[tiab] OR teenagers[tiab] OR teens[tiab] OR toddler[tiab] OR toddlers[tiab] OR youth[tiab] OR youths[tiab]

#3 Search "Family Relations"[Majr] OR family member[ti] OR family members[ti] OR father[ti] OR fathers[ti] OR grandparent[ti] OR grandparents[ti] OR mother[ti] OR mothers[tiab] OR parent[ti] OR parents[ti] OR relative[ti] OR relatives[ti] OR sibling[ti] OR siblings[ti]

#4 Search abuse[tiab] OR abused[tiab] OR abuses[tiab] OR abusing[tiab] OR challenge[tiab] OR challenges[tiab] OR challenging[tiab] OR damage[tiab] OR damaged[tiab] OR damages[tiab] OR damaging[tiab] OR experience[tiab] OR experienced[tiab] OR experiences[tiab] OR experiencing[tiab] OR expose[tiab] OR exposed[tiab] OR exposes[tiab] OR exposing[tiab] OR exposure[tiab] OR issue[tiab] OR issues[tiab] OR harm[tiab] OR harmed[tiab] OR harmful[tiab] OR harming[tiab] OR harms[tiab] OR hurt[tiab] OR hurting[tiab] OR hurts[tiab] OR impact[tiab] OR impacted[tiab] OR impacting[tiab] OR impacts[tiab] OR maltreatment[tiab] OR mistreat[tiab] OR mistreated[tiab] OR mistreating[tiab] OR mistreatment[tiab] OR mistreats[tiab] OR neglect[tiab] OR neglected[tiab] OR neglecting[tiab] OR neglects[tiab] OR problem[tiab] OR problems[tiab] OR risk[tiab] OR risked[tiab] OR risking[tiab] OR risks[tiab] OR risktaking[tiab]

#5 Search #1 AND #2 AND #3 AND #4

#6 Search editorial[pt] OR comment[pt] OR letter[pt] OR newspaper article[pt]

#7 Search #5 NOT #6

#8 Search #7 AND *Systematic review filter*: Publication date from 2007/01/01 to 2017/12/31; English

#9 Search #7 AND *Randomized controlled trial filter*: Publication date from 2007/01/01 to 2017/12/31; English

1  
2  
3  
4  
5  
6  
7  
8  
9  
10  
11  
12  
13  
14  
15  
16  
17  
18  
19  
20  
21  
22  
23  
24  
25  
26  
27  
28  
29  
30  
31  
32  
33  
34  
35  
36  
37  
38  
39  
40  
41  
42  
43  
44  
45  
46  
47  
48  
49  
50  
51  
52  
53  
54  
55  
56  
57  
58  
59  
60

#10 Search #7 AND *Observational studies filter*. Publication date from 2007/01/01 to 2017/12/31; English

For peer review only

**Depression Research Priority #: 9**

**Priority:** What interventions are effective in supporting employees with depression and reducing stigma associated with depression in the workplace?

**Suggested question (reviewer generated):** What interventions are effective in supporting employees with depression and reducing stigma associated with depression in the workplace?

**Date conducted:** 12 October 2017

**Database:** PubMed via NCBI Entrez (1946- )

**Records Retrieved:** 1571

**Strategy:**

#1 Search "Bipolar and Related Disorders"[Mesh] OR "Depression"[Mesh] OR "Depressive Disorder"[Mesh] OR "Mood Disorders"[Mesh:NoExp] OR affective disorder[tiab] OR affective disorders[tiab] OR bipolar[tiab] OR depression[tiab] OR depressive[tiab] OR depressives[tiab] OR manic disorder[tiab] OR manic disorders[tiab] OR mood disorder[tiab] OR mood disorders[tiab]

#2 Search ("Occupational Health"[Majr] OR "Workplace"[Mesh] OR employee[tiab] OR employees[tiab] OR employer[tiab] OR employers[tiab] OR job site[tiab] OR job sites[tiab] OR occupational health[ti] OR staff[tiab] OR worker[tiab] OR workers[tiab] OR work place[tiab] OR work places[tiab] OR workplace[tiab] OR workplaces[tiab]) AND ("Health Education"[Mesh:NoExp] OR "Health Policy"[Mesh] OR "Health Promotion"[Mesh] OR "Occupational Health Services"[Mesh] OR "Program Evaluation"[Mesh] OR "Sensitivity Training Groups"[Mesh] OR "Social Stigma"[Mesh] OR "Staff Development"[Mesh] OR course[tiab] OR courses[tiab] OR education[tiab] OR educational[tiab] OR intervention[tiab] OR interventions[tiab] OR policies[tiab] OR policy[tiab] OR program[tiab] OR programme[tiab] OR programmes[tiab] OR programming[tiab] OR programs[tiab] OR stigma[tiab] OR stigmatized[tiab] OR training[tiab])

#3 Search #1 AND #2

#4 Search editorial[pt] OR comment[pt] OR letter[pt] OR newspaper article[pt]

#5 Search #3 NOT #4

#6 Search #5 AND *Systematic review filter*: Publication date from 2007/01/01 to 2017/12/31; English

#7 Search #5 AND *Randomized controlled trial filter*: Publication date from 2007/01/01 to 2017/12/31; English

#8 Search #5 AND *Observational studies filter*: Publication date from 2007/01/01 to 2017/12/31; English

**Depression Research Priority #: 10**

**Priority:** Are there structural or functional changes in brains due to antidepressant therapy during brain development?

**Suggested question (reviewer generated):** Does antidepressant therapy result in neurodevelopmental delays or neurological harms in children and adolescents?

**Date conducted:** 4 July 2017

**Database:** PubMed via NCBI Entrez (1946- )

**Records Retrieved:** 731

**Strategy:**

#1 Search ("Antidepressive Agents/adverse effects"[Mesh] OR "Antidepressive Agents/contraindications"[Mesh] OR "Antidepressive Agents/poisoning"[Mesh] OR "Antidepressive Agents/toxicity"[Mesh] OR "Serotonin Syndrome"[Mesh] OR "Serotonin Uptake Inhibitors/adverse effects"[Mesh] OR "Serotonin Uptake Inhibitors/contraindications"[Mesh] OR "Serotonin Uptake Inhibitors/poisoning"[Mesh] OR "Serotonin Uptake Inhibitors/toxicity"[Mesh]) OR (("Antidepressive Agents"[Mesh] OR "Serotonin Uptake Inhibitors"[Mesh] OR anti-depressant\*[tiab] OR antidepressant\*[tiab] antidepressant agent\*[tiab] OR serotonin reuptake inhibitor\*[tiab] OR SSRI\*[tiab]) AND ("Abnormalities, Drug-Induced"[MeSH] OR "Drug Recalls"[MeSH] OR "Drug-Related Side Effects and Adverse Reactions"[MeSH:noexp] OR "Product Surveillance, Postmarketing"[MeSH] OR "Psychoses, Substance-Induced"[MeSH:noexp] OR "Safety-Based Drug Withdrawals"[MeSH] OR adverse[ti] OR ((adverse[tiab] OR harm[tiab] OR harmed[tiab] OR harmful[tiab] OR harms[tiab] OR injurious[tiab] OR serious[tiab] OR toxic[tiab] OR undesirable[tiab]) AND (effect\*[tiab] OR event\*[tiab] OR outcome\*[tiab] OR incident\*[tiab] OR reaction\*[tiab])) OR adversely[ti] OR chemically induced[tiab] OR complication\*[ti] OR drug induced[tiab] OR harm[ti] OR harms[ti] OR injurious[ti] OR poison\*[ti] OR reaction\*[ti] OR recall\*[ti] OR risk[ti] OR risks[ti] OR safe[ti] OR safety[tiab] OR side effect\*[tiab] OR toxic[tiab] OR toxicit\*[tiab] OR toxicologic\*[tiab] OR undesirable[ti] OR unsafe[tiab] OR warning\*[ti] OR withdrawal\*[ti] OR withdrawn\*[ti]))

#2 Search ("Adolescent Development"[Mesh] OR "Child Development"[Mesh] OR "Neurodevelopmental Disorders"[Mesh] OR "Neurodevelopmental Disorders "[Mesh] OR autism[tiab] OR autistic[tiab] OR ASD[tiab] OR brain[tiab] OR cognitive[tiab] OR delay[tiab] OR delays[tiab] OR develop[tiab] OR developed[tiab] OR developing[tiab] OR development[tiab] OR developmental[tiab] OR disabilities[tiab] OR disability[tiab] OR disorder[tiab] OR disorders[tiab] OR grow[tiab] OR growth[tiab] OR impair[tiab] OR impaired[tiab] OR impede[tiab] OR impeded[tiab] OR impedes[tiab] OR intellectual[tiab] OR intellectually[tiab] OR learn[tiab] OR learns[tiab] OR learning[tiab] OR mental[tiab] OR mentally[tiab] OR neurodevelopmental[tiab] OR neurological[tiab])

#3 Search "Adolescent"[Mesh] OR "Child"[Mesh] OR "Minors"[Mesh] OR adolescence[tiab] OR adolescent[tiab] OR adolescents[tiab] OR child[tiab] OR childhood[tiab] OR children[tiab] OR childrens[tiab] OR childs[tiab] OR preschooler[tiab] OR preschoolers[tiab] OR teen[tiab] OR teenaged[tiab] OR teenager[tiab] OR teenagers[tiab] OR teens[tiab] OR toddler[tiab] OR toddlers[tiab] OR youth[tiab] OR youths[tiab]

#4 Search #1 AND #2 AND #3

#5 Search ("Maternal Exposure"[Mesh] OR Pregnancy[Majr] OR "Prenatal Injuries"[Mesh] OR antenatal[ti] OR embryo[ti] OR embryos[ti] OR embryonic[ti] OR fetal[ti] OR fetus[ti] OR



1  
2  
3 fetuses[ti] OR gestational[ti] OR maternal[ti] OR pregnancies[ti] OR pregnancy[ti] OR  
4 pregnant[ti] OR prenatal[ti] OR prenataally[ti] OR utero[ti])  
5

6 #6 Search #4 NOT #5: Publication date from 2007/01/01 to 2017/12/31; English  
7  
8  
9  
10  
11  
12  
13  
14  
15  
16  
17  
18  
19  
20  
21  
22  
23  
24  
25  
26  
27  
28  
29  
30  
31  
32  
33  
34  
35  
36  
37  
38  
39  
40  
41  
42  
43  
44  
45  
46  
47  
48  
49  
50  
51  
52  
53  
54  
55  
56

For peer review only



**Depression Research Priority #: 11****Priority:** What is the role of the family in the treatment and trajectory of depression?**Suggested question (reviewer generated):** For patients with diagnosed depression, does family involvement in patients' lives decrease the progression or severity of depression symptoms, influence treatment decisions, or impact remission rates?**Date conducted:** 2 October 2017**Database:** PubMed via NCBI Entrez (1946- )**Records Retrieved:** 4689**Strategy:**

#1 Search "Bipolar and Related Disorders"[Mesh] OR "Depression"[Mesh] OR "Depressive Disorder"[Mesh] OR "Mood Disorders"[Mesh:NoExp] OR affective disorder[tiab] OR affective disorders[tiab] OR bipolar[tiab] OR depression[tiab] OR depressive[tiab] OR depressives[tiab] OR manic disorder[tiab] OR manic disorders[tiab] OR mood disorder[tiab] OR mood disorders[tiab]

#2 Search ("Family"[Majr] OR (children[ti] AND (families[tiab] OR family[tiab] OR father[tiab] OR fathers[tiab] OR mother[tiab] OR mothers[tiab] OR parent[tiab] OR parents[tiab])) OR familial[ti] OR families[ti] OR family[ti] OR fathers[ti] OR grandparent[ti] OR grandparents[ti] OR kin[ti] OR kinship[ti] OR maternal[ti] OR mothers[ti] OR offspring[ti] OR parent[ti] OR parental[ti] OR parents[ti] OR paternal[ti] OR sibling[ti] OR siblings[ti] OR spousal[ti] OR spouse[ti] OR spouses[ti])

#3 Search ("Convalescence"[Mesh] OR "Decision Making"[Mesh] OR "Disease Progression"[Mesh] OR "Disease-Free Survival"[Mesh] OR "Health Status Indicators"[Mesh] OR "Patient Participation"[Mesh] OR "Recovery of Function"[Mesh] OR "Remission Induction"[Mesh:NoExp] OR "Treatment Outcome"[Mesh] OR decide[tiab] OR decided[tiab] OR decides[tiab] OR decision[tiab] OR decisions[tiab] OR engage[tiab] OR engaged[tiab] OR engagement[tiab] OR engaging[tiab] OR involve[tiab] OR involved[tiab] OR involvement[tiab] OR involves[tiab] OR involving[tiab] OR ((outcome[tiab] OR outcomes[tiab]) AND (patient[tiab] OR patients[tiab] OR therapeutic[tiab] OR therapy[tiab] OR therapies[tiab] OR treatment[tiab])) OR participate[tiab] OR participates[tiab] OR participation[tiab] OR progress[tiab] OR progression[tiab] OR recover[tiab] OR recovers[tiab] OR recovered[tiab] OR recovery[tiab] OR remission[tiab] OR severe[tiab] OR severity[tiab] OR (successful[tiab] AND (therapy[tiab] OR therapies[tiab] OR treatment[tiab] OR treatments[tiab])) OR symptom[tiab] OR symptoms[tiab])

#4 Search #1 AND #2 AND #3

#5 Search editorial[pt] OR comment[pt] OR letter[pt] OR newspaper article[pt]

#6 Search #4 NOT #5

#7 Search #6 AND *Systematic review filter*. Publication date from 2007/01/01 to 2017/12/31; English

#8 Search #6 AND *Randomized controlled trial filter*. Publication date from 2007/01/01 to 2017/12/31; English

#9 Search #8 AND *Observational studies filter*. Publication date from 2007/01/01 to 2017/12/31; English

15

1  
2  
3  
4  
5  
6  
7  
8  
9  
10  
11  
12  
13  
14  
15  
16  
17  
18  
19  
20  
21  
22  
23  
24  
25  
26  
27  
28  
29  
30  
31  
32  
33  
34  
35  
36  
37  
38  
39  
40  
41  
42  
43  
44  
45  
46  
47  
48  
49  
50  
51  
52  
53  
54  
55  
56  
57  
58  
59  
60

For peer review only

1  
2  
3  
4  
5  
6  
7  
8  
9  
10  
11  
12  
13  
14  
15  
16  
17  
18  
19  
20  
21  
22  
23  
24  
25  
26  
27  
28  
29  
30  
31  
32  
33  
34  
35  
36  
37  
38  
39  
40  
41  
42  
43  
44  
45  
46  
47

**APPENDIX 2. DESIGN, METHODS AND CONCLUSIONS OF THE INCLUDED REVIEWS<sup>a,b</sup>**

<sup>a</sup>Presented in reverse chronological order, sorted by outcome or study design

<sup>b</sup>Limitations and conclusions as reported by the authors of each review

**Q1. Which treatment therapy or method for depression is more successful for long-term remission or recovery?**

| Study and design                                                                          | Participants                                                                                           | Methods                                                                                                                                           | Limitations                                                                                                                                                                                  | Conclusions                                                                                                                                                                                                                |
|-------------------------------------------------------------------------------------------|--------------------------------------------------------------------------------------------------------|---------------------------------------------------------------------------------------------------------------------------------------------------|----------------------------------------------------------------------------------------------------------------------------------------------------------------------------------------------|----------------------------------------------------------------------------------------------------------------------------------------------------------------------------------------------------------------------------|
| <b>Inducing remission in patients with depression</b>                                     |                                                                                                        |                                                                                                                                                   |                                                                                                                                                                                              |                                                                                                                                                                                                                            |
| <b>Agency for Healthcare Research and Quality (AHRQ) comparative effectiveness review</b> |                                                                                                        |                                                                                                                                                   |                                                                                                                                                                                              |                                                                                                                                                                                                                            |
| Gartlehner 2015 SR and meta-analysis                                                      | n = 606 adults with depression undergoing first-step therapy, from 5 RCTs (follow up: 4 to 52 weeks).  | Meta-analysis of RCTs comparing the effects of SGAs and CBT or combination therapy (SGAs and CBT); included studies published up to January 2015. | Potential for publication bias and selective outcome reporting; few RCTs and small sample sizes; available evidence is mainly at high risk of bias; low strength of evidence.                | No significant difference in rates of remission between patients treated with SGAs or CBT (RR 0.98, 95% CI 0.73 to 1.32); adding CBT to SGA did not show any beneficial effect (RR 1.06, 95% CI 0.82 to 1.38).             |
| Gartlehner 2015 SR and meta-analysis                                                      | n = 174 adults with depression undergoing first-step therapy, from 2 RCTs (follow up: 8 to 24 weeks).  | Meta-analysis of RCTs comparing the effects of SGAs and IPT or combination therapy (SGAs and IPT); included studies published up to January 2015. | Potential for publication bias and selective outcome reporting; few RCTs and small sample sizes; available evidence is mainly at high risk of bias; low strength of evidence.                | No significant difference in rates of remission between patients treated with SGAs or IPT (RR 0.92, 95% CI 0.78 to 1.08). The combination of SGAs and IPT had 25% higher remission rates than SGAs alone (no pooled data). |
| Gartlehner 2015 SR and meta-analysis                                                      | n = 51 adults with depression undergoing first-step therapy, from 1 RCT (follow up: 8 weeks).          | Meta-analysis of RCTs comparing the effects of SGAs and PSYD; included studies published up to January 2015.                                      | Potential for publication bias and selective outcome reporting; only one available RCT; low strength of evidence.                                                                            | No significant difference in rates of remission between patients treated with SGAs or short-term (2 to 4 months) PSYD (RR 1.04, 95% CI 0.58 to 1.86).                                                                      |
| Gartlehner 2015 SR and meta-analysis                                                      | n = 243 adults with depression undergoing first-step therapy, from 2 RCTs (follow up: 16 to 49 weeks). | Meta-analysis of RCTs comparing the effects of SGAs and third-wave CBT; included studies published up to January 2015.                            | Potential for publication bias and selective outcome reporting; few RCTs and small sample sizes; available evidence is mainly at high risk of bias; inadequate evidence to draw conclusions. | There was insufficient evidence to draw conclusions about rates of remission for patients treated with SGAs compared to third-wave CBT (RR 0.57, 95% CI 0.44 to 0.74).                                                     |
| Gartlehner 2015 SR                                                                        | n = 122 adults with depression undergoing second-step therapy, from 1 RCT (follow up: 14 weeks).       | Systematic review of RCTs comparing the effects of switching from a SGA to a new SGA or to CT; included studies published up to January 2015.     | Potential for publication bias and selective outcome reporting; only one available RCT; low strength of evidence.                                                                            | No significant difference in rates of remission between patients who switched to a new SGA compared to CT (27.9 vs. 25.0%, P = 0.69).                                                                                      |

| Study and design                  | Participants                                                                                                               | Methods                                                                                                                                               | Limitations                                                                                                       | Conclusions                                                                                                                                                         |
|-----------------------------------|----------------------------------------------------------------------------------------------------------------------------|-------------------------------------------------------------------------------------------------------------------------------------------------------|-------------------------------------------------------------------------------------------------------------------|---------------------------------------------------------------------------------------------------------------------------------------------------------------------|
| Gartlehner 2015<br>SR             | n = 182 adults with depression undergoing second-step therapy, from 1 RCT (follow up: 14 weeks).                           | Systematic review of RCTs comparing the effects of augmenting SGA therapy with another SGA or with CT; included studies published up to January 2015. | Potential for publication bias and selective outcome reporting; only one available RCT; low strength of evidence. | No significant difference in rates of remission between patients whose SGA treatment was augmented with another SGA compared to with CT (33.3 vs. 23.1%, P = 0.20). |
| <b>Cochrane systematic review</b> |                                                                                                                            |                                                                                                                                                       |                                                                                                                   |                                                                                                                                                                     |
| Cox 2014<br>SR and meta-analysis  | n = 48 adolescents (12 to 18 years) with depression without co-morbid conditions, from 1 RCT (follow up: 6 months).        | Meta-analysis of RCTs comparing the effects of CBT and SSRIs; included RCTs published up to June 2014.                                                | Only one included RCT with a small sample size; included study was at high risk of bias.                          | It was not possible to draw robust conclusions, nor to establish whether SSRIs or CBT was most effective (OR 0.83, 95% CI 0.27 to 2.60).                            |
| Cox 2014<br>SR and meta-analysis  | n = 203 adolescents (12 to 18 years) with depression without co-morbid conditions, from 2 RCTs (follow up: 6 to 9 months). | Meta-analysis of RCTs comparing the effects of SSRIs and combination therapy (CBT and SSRIs); included RCTs published up to June 2014.                | Only two included RCTs with small sample sizes; included studies were at high risk of bias.                       | It was not possible to draw robust conclusions, nor to establish whether SSRIs or combination therapy was most effective (OR 1.93, 95% CI 0.93 to 4.00).            |
| Cox 2014<br>SR and meta-analysis  | n = 152 adolescents (12 to 18 years) with depression without co-morbid conditions, from 1 RCT (follow up: 12 months).      | Meta-analysis of RCTs comparing the effects of SSRIs and combination therapy (CBT and SSRIs); included RCTs published up to June 2014.                | Only one included RCT with a small sample size; included study was at high risk of bias.                          | It was not possible to draw robust conclusions, nor to establish whether SSRIs or combination therapy was most effective (OR 0.49, 95% CI 0.14 to 1.69).            |
| Cox 2014<br>SR and meta-analysis  | n = 47 adolescents (12 to 18 years) with depression without co-morbid conditions, from 1 RCT (follow up: 6 months).        | Meta-analysis of RCTs comparing the effects of CBT and combination therapy (CBT and SSRIs); included RCTs published up to June 2014.                  | Only one included RCT with a small sample size; included study was at high risk of bias.                          | It was not possible to draw robust conclusions, nor to establish whether CBT or combination therapy was most effective (OR 2.55, 95% CI 0.78 to 8.36).              |
| Cox 2014<br>SR and meta-analysis  | n = 56 adolescents (13 to 19 years) with depression without co-morbid conditions, from 1 RCT (follow up: 12 months).       | Meta-analysis of RCTs comparing the effects of combination therapy (CBT and SSRIs) and CBT plus placebo; included RCTs published up to June 2014.     | Only one included RCT with a small sample size; included study was at high risk of bias.                          | It was not possible to draw robust conclusions, nor to establish whether combination therapy or CBT plus placebo was most effective (OR 1.20, 95% CI 0.29 to 5.02). |
| <b>Other reviews</b>              |                                                                                                                            |                                                                                                                                                       |                                                                                                                   |                                                                                                                                                                     |

| Study and design                                                    | Participants                                                                                                    | Methods                                                                                                                                                            | Limitations                                                                                                                                                                                                                                                              | Conclusions                                                                                                                                                                                                                                        |
|---------------------------------------------------------------------|-----------------------------------------------------------------------------------------------------------------|--------------------------------------------------------------------------------------------------------------------------------------------------------------------|--------------------------------------------------------------------------------------------------------------------------------------------------------------------------------------------------------------------------------------------------------------------------|----------------------------------------------------------------------------------------------------------------------------------------------------------------------------------------------------------------------------------------------------|
| Farah 2016<br>Umbrella SR                                           | n = 7,455 adults with depression, from 69 RCTs located in 7 SRs (follow up: not reported).                      | Umbrella review of RCTs comparing the effects of ADM and alternative therapies; included RCTs were identified from SRs published up to February 2016.              | Results are restricted to the reporting quality and rigour of existing SRs; risk of bias in included studies; between-study heterogeneity in interventions, patients, measurement scales, and follow up length; publication bias.                                        | No significant difference in remission rate between CBT and ADM (RR 0.94, 95% CI 0.81 to 1.09), interpersonal therapy (RR 1.03, 95% CI 0.78 to 1.37), or psychotherapy (RR 0.99 95% CI 0.30 to 10.12).                                             |
| Weitz 2015<br>Independent patient data meta-analysis                | n = 1,700 adults with depression (all outpatients), from 16 RCTs (follow up: 8 to 20 weeks).                    | Independent patient data meta-analysis comparing the effects of ADM and CBT; patient data were retrieved from RCTs published up to January 2014.                   | Outcome measurement scales are prone to bias and have psychometric flaws; included studies may not be representative; quality of some included studies was sub-optimal; inpatients were excluded.                                                                        | No significant difference in remission between patients treated with ADM or CBT (OR 1.18, P = 0.22); no significant difference in remission between treatments as a function of depression severity (OR 1.00, P = 0.93).                           |
| Trivedi 2009<br>SR                                                  | n = 467 adults with treatment-resistant depression, from 12 publications of 5 RCTs (follow up: 8 to 104 weeks). | Systematic review of RCTs comparing the effects of psychotherapy (DBT or CT) and ADM continuation, augmentation, or switch; included studies published up to 2009. | Most studies were underpowered to detect moderately large treatment effects; between-study heterogeneity in study designs and patient populations; limited number of good trials.                                                                                        | Evidence examining the effect of psychotherapy as augmentation or substitute therapy in resistant depression is sparse and reveals mixed results. Psychotherapy appears to be an equally effective treatment compared to ADM.                      |
| de Maat 2007<br>SR and meta-analysis                                | n = 903 adults with depression (all outpatients), from 7 RCTs (follow up: 8 to 20 weeks).                       | Meta-analysis of RCTs comparing the effects of psychotherapy and combination therapy (psychotherapy and ADM); included studies published up to 2005.               | Analysis included few studies of mixed methodological quality; some studies had small sample sizes, limiting statistical power; evidence for chronic depression is limited to 1 RCT; between-study heterogeneity in treatments; study-level biases in patient selection. | Remissions rates were significantly higher for patients treated with combined therapy compared to psychotherapy alone (OR 1.59, 95% CI 1.22 to 2.09). The superiority of combined therapy was not demonstrated for non-chronic or mild depression. |
| <b>Preventing relapse for patients in remission from depression</b> |                                                                                                                 |                                                                                                                                                                    |                                                                                                                                                                                                                                                                          |                                                                                                                                                                                                                                                    |
| <b>Cochrane systematic review</b>                                   |                                                                                                                 |                                                                                                                                                                    |                                                                                                                                                                                                                                                                          |                                                                                                                                                                                                                                                    |
| Cox 2012<br>SR and meta-analysis                                    | n = 46 children or adolescents (11 to 18 years) in remission from depression, from 1 RCT (follow up: 24 weeks). | Meta-analysis of RCTs comparing the effects of SSRIs and combination therapy (SSRIs and CBT); included RCTs published up to June 2011.                             | Only one included RCT with a small sample size; included study was at high risk of bias.                                                                                                                                                                                 | There was a greater rate of relapse in patients who received ADM alone compared to combination therapy, but the difference was not statistically significant (OR 0.26, 95% CI 0.05 to 1.15).                                                       |
| <b>Other reviews</b>                                                |                                                                                                                 |                                                                                                                                                                    |                                                                                                                                                                                                                                                                          |                                                                                                                                                                                                                                                    |

| Study and design                               | Participants                                                                                                 | Methods                                                                                                                                                                | Limitations                                                                                                                                                                                                                         | Conclusions                                                                                                                                                                                                                                                                                                                               |
|------------------------------------------------|--------------------------------------------------------------------------------------------------------------|------------------------------------------------------------------------------------------------------------------------------------------------------------------------|-------------------------------------------------------------------------------------------------------------------------------------------------------------------------------------------------------------------------------------|-------------------------------------------------------------------------------------------------------------------------------------------------------------------------------------------------------------------------------------------------------------------------------------------------------------------------------------------|
| Biesheuvel-Leliefeld 2015 SR and meta-analysis | n = 914 adults aged 18 to 64 years in remission from depression, from 13 RCTs (average follow up: 90 weeks). | Meta-analysis of RCTs comparing the effects of ADM and psychological interventions (CBT, MBCT, or IPT); included RCTs published up to May 2014.                        | Low quality of evidence from the included studies; between-study heterogeneity in definitions (relapse, recovery, remission, and recurrence), type and duration of interventions.                                                   | The risk for relapse was significantly less for patients treated with ADM compared to those treated with psychological interventions (RR 0.83, 95% CI 0.70 to 0.97).                                                                                                                                                                      |
| Guidi 2011 SR and meta-analysis                | n = 875 adult patients in remission from depression, from 8 RCTs (follow up: 28 weeks to 6 years).           | Meta-analysis of RCTs comparing the effects of psychotherapy and continuation of ADM following remission from depression; included RCTs published up to December 2008. | Sample sizes and number of studies were too small for definitive conclusions to be drawn; between-study heterogeneity in length of follow up and duration of treatments, and in control conditions.                                 | The sequential administration of psychotherapy after response to acute-phase pharmacotherapy, either alone or in combination with ADM, may play a role in reducing relapse and recurrence (sequential psychotherapy with or without ADM, RR 0.80, 95% CI 0.66 to 0.96; psychotherapy + ADM discontinuation, RR 0.65, 95% CI 0.46 to 0.91) |
| Piet 2011 SR and meta-analysis                 | n = 177 adults in remission from recurrent depression, from 2 RCTs (follow up: 15 to 18 months).             | Meta-analysis of RCTs comparing the effects of MBCT and ADM; included RCTs published up to November 2010.                                                              | Only two included RCTs with small sample sizes.                                                                                                                                                                                     | Although more studies are needed for firm conclusions, results from two studies suggest that MBCT is at least comparable to maintenance ADM for effective relapse prevention of recurrent depression (RR 0.80, 95% CI 0.60 to 1.08).                                                                                                      |
| Chiesa 2010 SR and meta-analysis               | n = 326 adults with depression, from 4 RCTs (follow up: up to 1 year).                                       | Meta-analysis of RCTs comparing the effects of MBCT, TAU (including ADM), and combination therapy (MBCT and TAU); included RCTs published up to July 2010.             | Low quality of some of the included studies; risk of bias in the included studies due to inability to blind the participants to treatment allocation and inadequate randomisation details; small samples sizes of included studies. | Augmentation of MBCT to TAU could result in significantly lower relapse or recurrence rates compared to TAU alone (including ADM) (OR 0.30, 95% CI 0.17 to 0.56); MBCT with gradual discontinuation of ADM was not significantly different from continuation ADM (OR 0.61, 95% CI 0.30 to 1.25; 1 RCT).                                   |

The reviews by Gartlehner (2015) and Cox (2014) reported on multiple comparisons, and we presented these in separate rows.

ADM: antidepressant medication; CBT: cognitive behavioural therapy; CT: cognitive therapy; DBT: dialectical behaviour therapy; IPT: interpersonal psychotherapy; MBCT: mindfulness-based cognitive therapy; PSYD: psychodynamic therapy; RCT: randomised controlled trial; SGA: second-generation antidepressant; SR: systematic review; SSRI: selective serotonin reuptake inhibitor; TAU: treatment as usual



**Q2. What are the long-term physical implications of pharmacotherapy for treating depression?**

| Study and design                                  | Participants                                                                             | Methods                                                                                                                                                                | Limitations                                                                                                                                                         | Conclusions                                                                                                                                                                                                                                                                                                                   |
|---------------------------------------------------|------------------------------------------------------------------------------------------|------------------------------------------------------------------------------------------------------------------------------------------------------------------------|---------------------------------------------------------------------------------------------------------------------------------------------------------------------|-------------------------------------------------------------------------------------------------------------------------------------------------------------------------------------------------------------------------------------------------------------------------------------------------------------------------------|
| <b>Reviews: bone mineral density and fracture</b> |                                                                                          |                                                                                                                                                                        |                                                                                                                                                                     |                                                                                                                                                                                                                                                                                                                               |
| Gebara 2014<br>Systematic review                  | n = 92,056 older adults (>60 y) from 18 studies (19 articles), follow-up NR.             | Narrative synthesis of primary studies of older adults with a sample size $\geq 100$ that assessed the association between SSRI or SNRI use and bone mineral density.  | Inconsistency in the available data from primary studies; lack of controlling for confounders; no experimental studies found.                                       | There is little evidence to support causation between SSRI or SNRI use and a decrease in bone mineral density.                                                                                                                                                                                                                |
| Wu 2013<br>Systematic review                      | n = 313,748 adults from 13 studies with mean follow-up of 4.1 to 8.4 y (cohort studies). | Meta-analysis of case-control and cohort studies that assessed the association between SSRI use and bone mineral density and fracture risk published up to March 2011. | Some sources of heterogeneity could not be assessed; lack of controlling for confounders.                                                                           | Current use of SSRIs is associated with an increased risk of fractures which may be independent of depression and bone mineral density (RR: 1.45, 95% CI: 1.31-1.60). Subgroup analysis showed increased risk for current but not former users.                                                                               |
| Eom 2012<br>Systematic review                     | n = >906,446 adults from 12 studies with a follow-up of 1 to 13 y.                       | Meta-analysis of case-control and cohort studies that assessed the association between SSRI use and incident bone fractures published up to October 2010.              | Lack of information regarding potential confounding variables in the primary studies; all studies were from Western countries.                                      | Use of SSRIs to treat depression in the elderly may increase the odds of incident fracture (OR: 1.69, 95% CI: 1.51, 1.90). Subgroup analysis showed decreased strength of association with a longer window of administration before the index date.                                                                           |
| Wu 2012<br>Systematic review                      | n = 269,381 adults from 12 studies with mean follow-up of 4.1 to 10 y (cohort studies).  | Meta-analysis of case-control and cohort studies that assessed the association between TCA use and bone mineral density and fracture risk published up to August 2010. | Lack of information on falls; lack of controlling for confounders in the primary studies.                                                                           | The use of TCAs is associated with a moderate increased risk of incident fractures, which may be independent of depression and bone mineral density (RR: 1.72, 95% CI: 1.51-1.95).                                                                                                                                            |
| Wu 2010<br>Systematic review                      | n = 148,776 adults from 14 studies with mean follow-up of 1 to 22 y.                     | Meta-analysis of prospective cohort studies that assessed the effects of depression on risk of fracture or bone loss published up to July 2009.                        | Small number of studies with heterogeneity in outcomes and tools to measure depression; poor reporting; lack of controlling for confounders in the primary studies. | Depression is associated with an increased risk of incident fracture and bone loss, which may be mediated by antidepressant use; the HR for fracture was higher in studies that did not adjust for antidepressant use (HR: 1.30, 95% CI: 1.11-1.52, n = 14,777) vs. those that did (HR: 1.05; 95% CI: 0.86-1.29, n = 93,380). |
| <b>Reviews: diabetes</b>                          |                                                                                          |                                                                                                                                                                        |                                                                                                                                                                     |                                                                                                                                                                                                                                                                                                                               |
| Rotella 2013<br>Systematic review                 | n = 424,557 adults from 23 studies with a mean follow-up of 2.8 to 34 y.                 | Meta-analysis of case-control and cohort studies that assessed the difference in risk of incident diabetes between those with and without symptoms of depression.      | Heterogeneity in methods to diagnose depression and diabetes; heterogeneity in confounders included across primary studies.                                         | Both depression (OR: 1.56, 95% CI: 1.37-1.77) and use of ADMs (OR: 1.68, 95% CI: 1.17-2.40) among those with depression are associated with an increased odds of incident diabetes.                                                                                                                                           |
| <b>Reviews: physical diseases (general)</b>       |                                                                                          |                                                                                                                                                                        |                                                                                                                                                                     |                                                                                                                                                                                                                                                                                                                               |

|                                                           |                                                                                                          |                                                                                                                                                                                                                                   |                                                                                                                                                                                          |                                                                                                                                                                                                                                                                                                                                |
|-----------------------------------------------------------|----------------------------------------------------------------------------------------------------------|-----------------------------------------------------------------------------------------------------------------------------------------------------------------------------------------------------------------------------------|------------------------------------------------------------------------------------------------------------------------------------------------------------------------------------------|--------------------------------------------------------------------------------------------------------------------------------------------------------------------------------------------------------------------------------------------------------------------------------------------------------------------------------|
| Correll 2015<br>Review (non-systematic)                   | NR                                                                                                       | Narrative synthesis of studies that assessed the relationship between the use of antipsychotics, mood stabilizers, or ADMS and physical illness (both short- and long-term).                                                      | Review allows for little differentiation between studies of both short- and long-term adverse events; few details on included study characteristics provided.                            | There is some evidence to associate certain AMDs with mild to modest weight gain, incident diabetes, hypothyroidism (lithium), cardiovascular adverse events, sudden cardiac death, hepatotoxicity, nephrotoxicity, seizure disorders and fractures. There was no evidence of association with breast cancer.                  |
| <b>Observational studies: cardiovascular risk factors</b> |                                                                                                          |                                                                                                                                                                                                                                   |                                                                                                                                                                                          |                                                                                                                                                                                                                                                                                                                                |
| Perez-Pinar 2016<br>Retrospective cohort                  | n = 524,952 adults aged ≥30 years from 140 primary care practices in east London, UK.                    | Medical and prescription records were reviewed for a 10 year period (2005-2015) and Cox regression models were used to estimate associations between use ADMs before 2005 and cardiovascular risk factors over the next 10 years. | Results might be affected by confounding variables; lack of information on ADM compliance or dosage; dichotomisation of continuous outcomes led to loss of data.                         | An independent association was observed between ADM prescriptions and risk of incident type 2 diabetes (HRs from 1.28, 95% CI: 1.23-1.33 to 1.35, 95% CI: 1.04-1.15), hypertension (HRs from 1.09, 95% CI: 1.05-1.12 to 1.11, 95% CI: 1.07-1.14), and hyperlipidemia (HRs 1.05, 95% CI: 1.03-1.07 to 1.12, 95% CI: 1.10-1.14). |
| Rubin 2013<br>Prospective cohort embedded within a RCT    | n = 5,145 adults in the Look AHEAD weight loss RCT followed at 16 clinical centres in the US.            | Patients in the Look AHEAD trial assessed yearly over 4 y for ADM exposure and cardiovascular risk factors; the relationship between ADM use in the past year and cardiovascular risk factors was assessed.                       | Observational design (cannot draw causal inferences); did not study a comprehensive array of cardiovascular risk factors; no information on dose or duration of treatment.               | Both depression symptoms and use of ADMs during the prior year were associated with current elevated cardiovascular risk factors including adverse blood cholesterol changes, serum triglycerides, diastolic blood pressure, and obesity (variable by treatment arm, but reasons were not assessed).                           |
| <b>Observational studies: hepatocellular carcinoma</b>    |                                                                                                          |                                                                                                                                                                                                                                   |                                                                                                                                                                                          |                                                                                                                                                                                                                                                                                                                                |
| Pocha 2014<br>Retrospective cohort                        | n = 109,736 adults with HCV who entered the US Veterans Affairs HCV Clinical Case Registry in 2000-2009. | Medical and prescription records were extracted from the US Veterans Affairs HCV Case Registry and Cox regression models were used to estimate associations between ADM use and incident hepatocellular carcinoma.                | All participants were veterans and most were male; cannot exclude association at larger doses; data on development of cirrhosis during the study period was not available (confounding). | The data from this large cohort of HCV patients does not support the hypothesis that SSRI exposure increases the risk of developing hepatocellular carcinoma for the highest observed average daily dose and for exposures between 6 and >30 months.                                                                           |

HCV: hepatitis C virus; HR: hazard ratio; NR: not reported; ns: not statistically significant; OR: odds ratio; RCT: randomised controlled trial; RR: risk ratio; SNRI: serotonin norepinephrine reuptake inhibitor; SSRI: selective serotonin reuptake inhibitor; TCA: tricyclic antidepressant; UK: United Kingdom; US: United States; y: years



**Q3a. For various non-pharmacological treatment options, what are the advantages in terms of cost?**

| Study and design                             | Participants                                                                                                        | Intervention (I) & comparator (C)                                                 | Methods                                                                                                                                                                                                      | Limitations                                                                                                                                                                                                                              | Conclusions                                                                                                                                                                                                                                                                                      |
|----------------------------------------------|---------------------------------------------------------------------------------------------------------------------|-----------------------------------------------------------------------------------|--------------------------------------------------------------------------------------------------------------------------------------------------------------------------------------------------------------|------------------------------------------------------------------------------------------------------------------------------------------------------------------------------------------------------------------------------------------|--------------------------------------------------------------------------------------------------------------------------------------------------------------------------------------------------------------------------------------------------------------------------------------------------|
| <b>Any psychotherapy</b>                     |                                                                                                                     |                                                                                   |                                                                                                                                                                                                              |                                                                                                                                                                                                                                          |                                                                                                                                                                                                                                                                                                  |
| <b>Systematic Reviews</b>                    |                                                                                                                     |                                                                                   |                                                                                                                                                                                                              |                                                                                                                                                                                                                                          |                                                                                                                                                                                                                                                                                                  |
| Karyotaki 2016 Systematic review             | n=477 individuals (age NR) from 3 RCTs with moderate or severe major depressive disorder.                           | I: any treatment<br>C: any other treatment or control                             | Review of RCTs on cost-effectiveness of any treatment vs. any other type of treatment (e.g., psychological, pharmacological, treatment as usual) for common mental disorders published up to December 2014 . | Heterogeneity across studies limited the development of robust conclusions; individual study results may not be generalizable to other countries.                                                                                        | There was no difference in QALY gains for CBT- or psychologist enhanced-PEP vs. PEP alone over 36 months; at a willingness-to-pay >USD 405/depression-free day, CBT-enhanced PEP was the most cost-effective. There was no difference in costs for SPD vs. SSFT over 12 months.                  |
| Bower 2011 Cochrane systematic review        | n=197 adults from one RCT diagnosed with depression or mixed depression and anxiety in the UK.                      | I: counselling<br>C: CBT                                                          | Review of RCTs of counselling vs. other psychological or pharmacological therapies for mental health in primary care, published up to May 2011.                                                              | Study was at high risk of bias due to lack of blinding of participants, personnel and outcome assessors.                                                                                                                                 | Cost effectiveness and minimization evaluation showed that at 4 and 12 months there was no difference in total costs across treatments.                                                                                                                                                          |
| <b>RCTs</b>                                  |                                                                                                                     |                                                                                   |                                                                                                                                                                                                              |                                                                                                                                                                                                                                          |                                                                                                                                                                                                                                                                                                  |
| Goodyer 2017 Multicentre superiority RCT     | n=465 adolescents with major depressive disorder from 15 CAMHS clinics in England.                                  | I <sub>1</sub> : CBT<br>I <sub>2</sub> : SPA<br>C: brief psychosocial therapy     | Comparison of cost-effectiveness based on the Child and Adolescent Service Use Schedule and EuroQol 5D questionnaire, with follow-up to 86 weeks (21 months).                                                | Reasons for type of pharmacotherapy, compliance and prescribing were not controlled; improvements could be a function of time; lack of no treatment control limits ability to infer that treatment was causally effective; missing data. | Intervention costs were lowest for CBT (mean (SD) £904.57 (607.25)) and highest for SPA (£1396.72 (1133.41)). The cost of health, social care and education services differed little between groups. There was no evidence for any difference in cost-effectiveness nor QALYs across treatments. |
| Egede 2017 Non-inferiority RCT               | n=241 elderly (>58 years) veterans with major depressive disorder from clinics in South Carolina and Virginia, USA. | Behavioural activation<br>I: BA via telemedicine<br>C: traditional BA (same-room) | Comparison of overall, in- and outpatient, and pharmacy cost data collected from VA Health Economics Center datasets for the 1998-2014 fiscal years (6 years).                                               | Limited generalisability to women and younger patients, or to other countries.                                                                                                                                                           | Overall, outpatient and pharmacy costs showed an increasing trend over time with minimal difference between groups. Telemedicine BA had a higher inpatient cost than same-room BA (~USD 2,750 vs. 1,500).                                                                                        |
| Richards 2016 Open-label non-inferiority RCT | n=221 adults with major depressive disorder from primary care services in Devon,                                    | I: BA via junior health worker<br>C: CBT via psychologists                        | Economic analysis using the Adult Service Use Schedule, the Health and Work Performance Questionnaire, and EuroQol-5D-3L, taking UK                                                                          | Attrition rates may have affected the results; 35% of participants did not attend even a minimal number of sessions; did not control for                                                                                                 | Intervention costs were higher for CBT than BA ((mean (SD) £1235.23 (610.03) vs. £974.81 (475.02), p<0.0001), but there were no differences in other or                                                                                                                                          |

| Study and design                      | Participants                                                                                                                                                                 | Intervention (I) & comparator (C)                                                          | Methods                                                                                                                                                                                                                                                          | Limitations                                                                                                                                                                                                                                                           | Conclusions                                                                                                                                                                                                                                                                                                                                                                         |
|---------------------------------------|------------------------------------------------------------------------------------------------------------------------------------------------------------------------------|--------------------------------------------------------------------------------------------|------------------------------------------------------------------------------------------------------------------------------------------------------------------------------------------------------------------------------------------------------------------|-----------------------------------------------------------------------------------------------------------------------------------------------------------------------------------------------------------------------------------------------------------------------|-------------------------------------------------------------------------------------------------------------------------------------------------------------------------------------------------------------------------------------------------------------------------------------------------------------------------------------------------------------------------------------|
|                                       | Durham, and Leeds, UK.                                                                                                                                                       |                                                                                            | National Health Services and personal social services perspectives with follow-up to 18 months.                                                                                                                                                                  | use of medications; trial was not blinded.                                                                                                                                                                                                                            | total costs. Mean health state utility scores and QALYs did not differ between groups. The incremental cost-effectiveness ratio was -£6865 for BA vs. CBT; BA was less costly and more effective.                                                                                                                                                                                   |
| Maljanen 2016 Non-inferiority RCT     | n=326 adult patients with a mood or anxiety disorder who were part of the Helsinki Psychotherapy Study from 1994-2000.                                                       | I <sub>1</sub> : Solution-focused therapy<br>I <sub>2</sub> : SPD<br>C: LPD                | Comparison of direct and indirect costs due to treatment of mental disorders and non-mental (somatic) disorders across treatment conditions using data from patient level registers or self-report questionnaires, with follow-up to 5 years.                    | Patient preferences and suitability for treatment were not considered; results might be confounded by the fact that patients in the short-term therapy groups spent more time in auxiliary therapies; may not be generalizable to older populations, other countries. | Mean direct costs were about three times higher for the LPD (€22,132) compared to the SPD (€7,387) and solution-focused groups (€8,434), mainly due to the higher cost of the sessions. Indirect costs due to mental health problems were also higher in the LPD vs. other groups. LPD was somewhat more effective than the shorter therapies.                                      |
| Warmerdam 2010 Three-armed RCT        | n=236 adults with depressive symptoms.                                                                                                                                       | I <sub>1</sub> : Internet CBT<br>I <sub>2</sub> : Internet PST<br>C: usual care            | Comparison of costs from a societal perspective for direct medical costs and indirect or direct nonmedical costs using data from the Trimbos/iMTA as well as self-report, with follow-up to 12 weeks.                                                            | High attrition; short follow-up; underpowered to detect significant differences between CBT and PST.                                                                                                                                                                  | Total costs between CBT and PST were not different. There was an incremental cost-effectiveness ratio of -36 for PST vs. CBT. There was no difference in cost-utility between groups. Sensitivity analyses showed a 72% probability that PST results in modestly better QALY gains at lower cost than CBT.                                                                          |
| Morrell 2009 RCT (cluster randomised) | n= 2,659 women (418 at-risk women) with postnatal depression who were part of registered general practitioners' practices in the former Trent Regional Health Authority, UK. | I <sub>1</sub> : CBT<br>I <sub>2</sub> : person-centered therapy approach<br>C: usual care | Economic evaluation following NICE guidelines, taking a social service perspective and using resource use data from the literature and general practitioner records, and prescription cost data from the British National Formulary, with follow-up to 6 months. | High attrition; potential cluster effects; statistical tests used may be prone to bias.                                                                                                                                                                               | For at-risk women the mean costs appeared lower for CBT than the person-centred approach. The number of QALYs gained did not differ. CBT had a higher probability of being cost-effective (>70%) than the person-centered approach in the range of QALY values between £20,000 and £30,000. For the full sample, there was very little difference in terms of cost or QALYs gained. |

| Study and design                     | Participants                                                                                                             | Intervention (I) & comparator (C)                                                                | Methods                                                                                                                                                                                                      | Limitations                                                                                                                                                | Conclusions                                                                                                                                                                                                                                                                                                                                                                          |
|--------------------------------------|--------------------------------------------------------------------------------------------------------------------------|--------------------------------------------------------------------------------------------------|--------------------------------------------------------------------------------------------------------------------------------------------------------------------------------------------------------------|------------------------------------------------------------------------------------------------------------------------------------------------------------|--------------------------------------------------------------------------------------------------------------------------------------------------------------------------------------------------------------------------------------------------------------------------------------------------------------------------------------------------------------------------------------|
| Dunn 2007                            | n=101 male veterans with chronic combat-related PTSD and depressive disorder from two outreach centres in Virginia, USA. | I: self-management therapy<br>C: PEP                                                             | Comparison of outpatient, hospitalisation, pharmacy, and other costs using data from the Virginia Health Economics Resource Centre and Pharmacy Benefits Management System, with follow up to 12 months.     | Not generalizable to other groups (all male veterans); many eligible individuals refused to participate (potentially biased sample).                       | Self-management therapy was only marginally more effective than PEP during treatment (effect disappeared during follow-up). Self-management participants had lower outpatient psychiatric (mean (SD) USD 3,534 (2,956) vs. 5,246 (4,094)) and medical/surgical costs (USD 3,597 (3,235) vs. 5,453 (4,611)) than the PEP group. The groups did not differ in health care utilization. |
| <b>Observational studies</b>         |                                                                                                                          |                                                                                                  |                                                                                                                                                                                                              |                                                                                                                                                            |                                                                                                                                                                                                                                                                                                                                                                                      |
| Berghout 2010<br>Quasi-experimental  | n=182 adult patients from four mental healthcare organisations in the Netherlands.                                       | I: psychoanalysis via mental health workers<br>C: psychoanalytic psychotherapy (lower intensity) | Cost-utility analysis including costs of resource use obtained from administrative records, and societal costs measured with the Trimbos/iMTA and Health and Labor questionnaire over the course of therapy. | Large amounts of missed data imputed; unassessed covariates (confounding); patients may not have been equivalent at baseline.                              | Psychoanalysis was more costly than psychoanalytic psychotherapy (€103,507 vs. 22,576) but also more effective from a health-related quality of life perspective. The incremental cost-effectiveness ratio for psychoanalysis was €52,384 per QALY gained as compared to psychoanalytic psychotherapy.                                                                               |
| <b>Cognitive behavioural therapy</b> |                                                                                                                          |                                                                                                  |                                                                                                                                                                                                              |                                                                                                                                                            |                                                                                                                                                                                                                                                                                                                                                                                      |
| <b>Reviews</b>                       |                                                                                                                          |                                                                                                  |                                                                                                                                                                                                              |                                                                                                                                                            |                                                                                                                                                                                                                                                                                                                                                                                      |
| Andersen 2016<br>Systematic review   | n=133 adults from 2 RCTs with an anxiety or depressive disorder.                                                         | I: transdiagnostic CBT<br>C: diagnosis-specific CBT or relaxation                                | Review of RCTs comparing CBT to any comparison condition in transdiagnostic studies published up to June 2013.                                                                                               | Lack of any available evidence to draw conclusions.                                                                                                        | The review intended to compare costs however no cost-effectiveness data was reported by any of the included studies.                                                                                                                                                                                                                                                                 |
| Boudreau 2010<br>CADTH rapid review  | NR; one study of individuals with depression in Australia.                                                               | I: self-directed CBT (bibliotherapy)<br>C: traditional CBT                                       | Review of RCTs and economic studies comparing self-directed CBT to traditional CBT for treatment of depression published up to January 2010.                                                                 | Generalisability limited to Australia or populations with similar funding structure; unclear how the economic model was constructed or patients recruited. | Bibliotherapy was the cheapest option for CBT, being cost-effective at A\$10,000 per DALY. Group and individual CBT provided by a psychologist on public salary were also considered cost-effective.                                                                                                                                                                                 |
| <b>RCTs</b>                          |                                                                                                                          |                                                                                                  |                                                                                                                                                                                                              |                                                                                                                                                            |                                                                                                                                                                                                                                                                                                                                                                                      |
| Romero-Sanchiz 2017                  | n=194 adults with depression from                                                                                        | Internet-based CBT<br>I: psychotherapist support                                                 | Economic analysis from a societal and healthcare perspective with follow-up at                                                                                                                               | Patient attrition may have limited the results; insufficient sample size for                                                                               | Internet-based CBT was more cost-effective than supported CBT (mean (SD) €1402.81 (429.64) vs.                                                                                                                                                                                                                                                                                       |

| Study and design                          | Participants                                                                                                                | Intervention (I) & comparator (C)                                                                 | Methods                                                                                                                                                                                                                                                                                                                 | Limitations                                                                                                                                                                                  | Conclusions                                                                                                                                                                                                                                                                                                                                                        |
|-------------------------------------------|-----------------------------------------------------------------------------------------------------------------------------|---------------------------------------------------------------------------------------------------|-------------------------------------------------------------------------------------------------------------------------------------------------------------------------------------------------------------------------------------------------------------------------------------------------------------------------|----------------------------------------------------------------------------------------------------------------------------------------------------------------------------------------------|--------------------------------------------------------------------------------------------------------------------------------------------------------------------------------------------------------------------------------------------------------------------------------------------------------------------------------------------------------------------|
| Multi-centre three-armed parallel RCT     | primary care centres in Spain.                                                                                              | I <sub>2</sub> : no psychotherapist support<br>C: usual care                                      | 12 months (based on publicly financed health care with universal coverage).                                                                                                                                                                                                                                             | subgroup analyses (e.g., by age or sex).                                                                                                                                                     | €1717.15 (509.49)). Supported CBT showed more efficacy and utility, but clinical results for unsupported CBT were almost as good while saving costs.                                                                                                                                                                                                               |
| Meuldijk 2015 RCT                         | n=182 adult patients with mild to moderate anxiety or depressive disorder at 5 Dutch outpatient Mental Healthcare Centres . | I: concise CBT (7 sessions/7 weeks)<br>C: standard CBT (unlimited sessions/1 year)                | Economic evaluation undertaken from a societal perspective using case records and the Trimbos/IMTA questionnaire for costs associated with psychiatric illness, with follow-up to 3, 6, and 12 months.                                                                                                                  | Small sample size and high attrition; study underpowered to detect cost differences; protocol deviations.                                                                                    | There was no difference in total direct healthcare and non-healthcare costs for concise vs. standard treatment. There was also no significant difference in QALYs by treatment type. The probability that concise care is more cost-effective than standard care remains below the turning point threshold of 0.5 for all acceptable values of willingness to pay. |
| Kafali 2014 Three-armed RCT               | n=171 adult Latino patients with depression from multiple clinics in Boston, Massachusetts and San Juan, Puerto Rico, USA.  | I <sub>1</sub> : telephone CBT<br>I <sub>2</sub> : face-to-face CBT<br>C: usual care              | Comparison of the cost-effectiveness in terms of mental health care costs (intervention and non-intervention) using prices from the 2010 Medical Expenditure Panel Survey, with follow up to 4 months.                                                                                                                  | Short follow-up period; insufficient information to compute QALYs; service use due to comorbidities not quantified.                                                                          | Telephone CBT was less costly in terms of mental health care costs by USD 501 compared to face-to-face CBT. For a one score reduction on the Patient Health Questionnaire, the cost of telephone CBT was USD 634 less than face-to-face CBT.                                                                                                                       |
| <b>Observational studies</b>              |                                                                                                                             |                                                                                                   |                                                                                                                                                                                                                                                                                                                         |                                                                                                                                                                                              |                                                                                                                                                                                                                                                                                                                                                                    |
| Solomon 2015 Mathematical modelling study | Used data from a RCT of n=720 community-based volunteers with mild-to-moderate depression in Australia.                     | I: Internet-based CBT<br>C <sub>1</sub> : face-to-face CBT<br>C <sub>2</sub> : treatment as usual | Examination of a stepped-care treatment model including Internet CBT as a first step, with cost analysis based on time spent in each health state (depression, remission, maintenance) and resource utilization from literature and administrative data, with a time horizon of 28 weeks and a public insurance scheme. | Model has several assumptions (e.g., delivery costs, discontinuation rate); several cost sources not included in the model (indirect costs, cost of adverse effects); short-term time frame. | Internet CBT had a higher net monetary benefit than face-to-face CBT (mean (SD) A\$12,474 (6,522-16,600) vs. A\$11,952 (5,159-16,255)). The incremental cost relative to Internet CBT was A\$1,995 per individual for face-to-face CBT. At a willingness to pay threshold of A\$50,000, there is a 75.5% probability that Internet CBT is cost effective.          |
| Hammond 2012 Quasi-experimental           | n=39,227 adults referred to psychological therapies in NE Herts,                                                            | Low-intensity CBT<br>I: over telephone<br>C: face-to-face                                         | Comparison of cost-per-session for each type of therapy for the financial year 2009/2010 using a cost-                                                                                                                                                                                                                  | Potential that findings are the result of natural resolution of symptoms; unassessed covariates (confounding);                                                                               | The per-session cost of telephone CBT was 36.2% lower than face-to-face CBT (mean (95% CI) £79.19 (55.0-103.3) vs. 118.76                                                                                                                                                                                                                                          |

1  
2  
3  
4  
5  
6  
7  
8  
9  
10  
11  
12  
13  
14  
15  
16  
17  
18  
19  
20  
21  
22  
23  
24  
25  
26  
27  
28  
29  
30  
31  
32  
33  
34  
35  
36  
37  
38  
39  
40  
41  
42  
43  
44  
45  
46  
47

| Study and design                 | Participants                                                                                                                                      | Intervention (I) & comparator (C)  | Methods                                                                                                                                                                                | Limitations                                                                                                         | Conclusions                                                                                                                                                                                              |
|----------------------------------|---------------------------------------------------------------------------------------------------------------------------------------------------|------------------------------------|----------------------------------------------------------------------------------------------------------------------------------------------------------------------------------------|---------------------------------------------------------------------------------------------------------------------|----------------------------------------------------------------------------------------------------------------------------------------------------------------------------------------------------------|
|                                  | NE Essex, Suffolk, W Herts, Mid Essex, Bedfordshire, and Cambridgeshire, UK.                                                                      |                                    | minimization approach based on treatment equivalence for each therapy.                                                                                                                 | some patients excluded since they received a mix of treatments.                                                     | (82.5-155.0)). The telephone treatment also appeared to be more effective in reducing depression scores.                                                                                                 |
| Brown 2011<br>Quasi-experimental | n=85 adults with a primary diagnosis of depression from five psychology services provided by a large mental health Trust in southeast London, UK. | I: group CBT<br>C: individual CBT. | Comparison of costs of providing each type of treatment, including staff time, non-staff costs, organisational overheads, and capital at 2006-2007 rates over the course of treatment. | Unassessed covariates (confounding); patients may have differed in terms of other diagnoses or depression severity. | Individual CBT was 1.5 times more costly to provide than group CBT (mean (SD) £375.32 (216) vs. 246.33 (108)), with no difference in effectiveness in terms of reduced depressive and distress symptoms. |

BA: behavioural activation; CADTH: Canadian Agency for Drugs and Technologies in Health; CAMHS: Child and Adolescent Mental Health Service (UK); CBT: cognitive behavioural therapy; DALY: disability-adjusted life-year; iMTA: Institute of Medical Technology Assessment; LPD: long-term psychodynamic therapy; NICE: National Institute for Health and Care Excellence; NR: not reported; PEP: psychoeducation program; PST: problem-solving therapy; PTSD: post-traumatic stress disorder; QALY: quality-adjusted life-years; RCT: randomised controlled trial; REBT: rational emotive behavioural therapy; SPA: short-term psychoanalytic therapy; SPD: short-term psychodynamic therapy; SSFT: short-term solution-focused therapy; SSRI: selective serotonin reuptake inhibitor; UK: United Kingdom; USA: United States of America

For peer review only

**Q3b. For various non-pharmacological treatment options, what are the advantages in terms of safety?**

| Study                               | Participants                                                                                                                                                                              | Methods                                                                                                                                                                                                                     | Limitations <sup>b</sup>                                                                                                                                                                                                    | Conclusions <sup>b</sup>                                                                                                                                                                   |
|-------------------------------------|-------------------------------------------------------------------------------------------------------------------------------------------------------------------------------------------|-----------------------------------------------------------------------------------------------------------------------------------------------------------------------------------------------------------------------------|-----------------------------------------------------------------------------------------------------------------------------------------------------------------------------------------------------------------------------|--------------------------------------------------------------------------------------------------------------------------------------------------------------------------------------------|
| <b>Reviews</b>                      |                                                                                                                                                                                           |                                                                                                                                                                                                                             |                                                                                                                                                                                                                             |                                                                                                                                                                                            |
| Gertler 2015                        | n = 77 adults who had sustained a TBI undergoing psychotherapy for depression, from 1 RCT (follow up: 3 months).                                                                          | Cochrane systematic review of RCTs comparing CBT and supportive psychotherapy for depression post-TBI. Included studies published up to February 2015.                                                                      | Only one included study. Study was at high risk of bias.                                                                                                                                                                    | No adverse events were reported.                                                                                                                                                           |
| Shinohara 2013                      | n = 955 adults undergoing psychotherapy for depression, from 25 RCTs and cross-over trials (follow up: up to 6 months).                                                                   | Cochrane systematic review of RCTs and cross-over trials comparing: BT and all other psychotherapies; BT and CBT; BT and psychodynamic therapies; BT and integrative therapies. Included studies published up to July 2013. | Most studies had a small sample size and were at unclear or high risk of bias.                                                                                                                                              | No study provided reports of adverse effects.                                                                                                                                              |
| <b>Randomised controlled trials</b> |                                                                                                                                                                                           |                                                                                                                                                                                                                             |                                                                                                                                                                                                                             |                                                                                                                                                                                            |
| Goodyer 2017                        | n = 470 adolescents (11 to 17 years) with depression recruited from NHS child and adolescent mental health service clinics, UK (follow up: 86 weeks).                                     | Randomised trial comparing brief psychosocial intervention (12 sessions over 20 weeks), CBT (20 sessions over 30 weeks), and short-term psychoanalytical therapy (28 sessions over 30 weeks).                               | 16% loss to follow up; some patients in all three groups received antidepressant medication (not controlled for); absence of a no-treatment control group.                                                                  | Physical adverse events (self-reported breathing problems, sleep disturbances, drowsiness or tiredness, nausea, sweating, and being restless or overactive) did not differ between groups. |
| Richards 2016                       | n = 221 adults with depression recruited from primary care and psychological therapy services in Devon, Durham, and Leeds, UK (follow up: 6, 12, and 18 months).                          | Randomised trial comparing BA and CBT (maximum of 20 60-minute sessions over 16 weeks, with the option of four additional booster sessions).                                                                                | High level of attrition (35%); did not control for the contribution of antidepressant medications; could not mask participants to treatment allocation.                                                                     | No adverse events related to the treatments were reported.                                                                                                                                 |
| Egede 2015                          | n = 780 veterans (≥58 years) with depression recruited from the Ralph H Johnson Veterans Affairs Medical Centre and four associated outpatient clinics in the USA (follow up: 12 months). | Randomised trial comparing BA provided for 60 minutes, once per week via telemedicine (in-home videoconferencing) and via same-room treatment.                                                                              | Excluded patients with acute safety concerns, substance dependence, and active psychosis or dementia; information technology used is now obsolete; included few women; some patients were taking antidepressant medication. | We did not note any adverse events.                                                                                                                                                        |



1  
2  
3  
4  
5  
6  
7  
8  
9  
10  
11  
12  
13  
14  
15  
16  
17  
18  
19  
20  
21  
22  
23  
24  
25  
26  
27  
28  
29  
30  
31  
32  
33  
34  
35  
36  
37  
38  
39  
40  
41  
42  
43  
44  
45  
46  
47

| Study           | Participants                                                                                                                                                                                     | Methods                                                                                                                                                                                                        | Limitations <sup>b</sup>                                                                                                           | Conclusions <sup>b</sup>                                                                                                                                                                                                                                                                                                                                                  |
|-----------------|--------------------------------------------------------------------------------------------------------------------------------------------------------------------------------------------------|----------------------------------------------------------------------------------------------------------------------------------------------------------------------------------------------------------------|------------------------------------------------------------------------------------------------------------------------------------|---------------------------------------------------------------------------------------------------------------------------------------------------------------------------------------------------------------------------------------------------------------------------------------------------------------------------------------------------------------------------|
| Berking 2013    | n = 432 adult inpatients with depression from a routine mental health care hospital in Germany (mean follow up: 46 days).                                                                        | Randomised trial comparing CBT (1.5 hours per week, plus four 45-minute sessions of transdiagnostic group therapy) and CBT-ERT (four 1.5-hour and two 45-minute ERT sessions replaced 10 of the CBT sessions). | Follow up only post-treatment; participants also received sports therapy and occupational therapy; no data on treatment integrity. | No adverse events were reported.                                                                                                                                                                                                                                                                                                                                          |
| Himmelhoch 2013 | n = 34 low-income, urban dwelling, HIV infected adults with depression recruited from two HIV clinics in the USA (follow up: 14 weeks).                                                          | Randomised trial comparing telephone-based CBT (11 45-minute sessions over 14 weeks) and face-to-face CBT (11 60-minute sessions over 14 weeks).                                                               | Short length of treatment and follow up; small sample size.                                                                        | None of the participants discontinued treatment due to adverse events.                                                                                                                                                                                                                                                                                                    |
| Merry 2012      | n = 187 adolescents (12 to 19 years) who sought help for depression, recruited from youth clinics, general practices, and school-based counseling services in New Zealand (follow up: 3 months). | Randomised trial comparing computerised CBT via interactive fantasy game (7 modules over 4 to 7 weeks) and face-to-face counseling.                                                                            | Small sample sizes for some subgroup analyses.                                                                                     | One participant in the computerised CBT group and two in the face-to-face group experience mild adverse events, and eight in each group experienced moderately severe adverse events (e.g., worsening of mood, suicidal thinking); two participants in the computerised CBT group and one in the face-to-face group experienced suicide attempts (serious adverse event). |

BA = behavioural activation; CBT = cognitive behavioural therapy; ERT = emotion regulation skills training; HIV: human immunodeficiency virus; NHS = National Health Service; RCT = randomised controlled trial; TBI = traumatic brain injury; UK = United Kingdom; USA = United States of America



**Q3c. For various non-pharmacological treatment options, what are the advantages in terms of effectiveness and relapse prevention?**

| Study                           | Participants                                                                                                                                                                        | Methods                                                                                                                                                                                                                                           | Limitations                                                                                                                    | Conclusions                                                                                                                                                                                                                                                                                                                                                                                                                                                                                                                                                                                                                                                                                                                                                                                                                                                    |
|---------------------------------|-------------------------------------------------------------------------------------------------------------------------------------------------------------------------------------|---------------------------------------------------------------------------------------------------------------------------------------------------------------------------------------------------------------------------------------------------|--------------------------------------------------------------------------------------------------------------------------------|----------------------------------------------------------------------------------------------------------------------------------------------------------------------------------------------------------------------------------------------------------------------------------------------------------------------------------------------------------------------------------------------------------------------------------------------------------------------------------------------------------------------------------------------------------------------------------------------------------------------------------------------------------------------------------------------------------------------------------------------------------------------------------------------------------------------------------------------------------------|
| <b>Children and adolescents</b> |                                                                                                                                                                                     |                                                                                                                                                                                                                                                   |                                                                                                                                |                                                                                                                                                                                                                                                                                                                                                                                                                                                                                                                                                                                                                                                                                                                                                                                                                                                                |
| Zhou 2015                       | n = 2,361 children and adolescents with a diagnosis of major or minor depression, intermittent depression, or dysthymia; short- (1-6 months) and long-term (6-12 months) follow-up. | Network meta-analysis of 52 RCTs including 9 psychotherapy conditions to test their comparative efficacy (CBT, IPT, supportive, cognitive, family, play, behavioural, problem-solving, and psychodynamic therapies), published from 1980 to 2013. | Heterogeneity in treatments included in some nodes of the analysis; exclusion of treatment-resistant and psychotic depression. | For efficacy at post-treatment, IPT (SMD = -0.93, 95% CI = -1.66 to -0.20) and CBT (SMD = -0.80, 95% CI = -1.55 to -0.06) were more beneficial than play therapy. At short-term follow-up, IPT was more effective than problem-solving therapy (SMD = -0.99); CBT was more effective than cognitive therapy and problem-solving therapy (data NR). At long-term follow-up, IPT was more beneficial than CBT and cognitive therapy (data NR). Overall, at follow-up IPT (SMD = -1.10, 95% CI = -1.90 to -0.27) and CBT (SMD = -0.90, 95% CI = -1.56 to -0.3) were more beneficial than problem-solving therapy. Thus, IPT and CBT should be the initial choice of treatment.                                                                                                                                                                                    |
| Hazell 2009                     | n = NR children and adolescents with depression; follow-up variable across comparisons; follow-up to 24 months.                                                                     | 'Clinical evidence review' of SRs, RCTs and observational studies comparative effects of various psychotherapies (CBT, IPT), published up to April 2008.                                                                                          | Low quality evidence.                                                                                                          | One SR found no difference between IPT and CBT in remission rates or depressive symptoms at the end of treatment. Compared with family therapy, individual CBT may be more effective at increasing remission rates but not at improving self-rated depressive symptoms (1 SR). Compared to supportive therapy, CBT may be more effective at increasing remission rates at the end of treatment but not at maintaining remission at 9 or 24 months or at improving self-rated symptoms (1 SR). In 1 RCT there was no difference in effectiveness between group therapeutic support and social skills training. There was no evidence for difference in effectiveness of family therapy vs. supportive therapy or psychodynamic therapy. There was no difference between CBT and non-directive supportive therapy in maintenance of remission at 9 or 24 months. |
| Spielmanns 2007                 | n = NR children and adolescents ( $\leq 18$ years) suffering from symptoms of anxiety or depression; follow-up NR.                                                                  | Meta-analysis of RCTs to compare the effectiveness of CBT to other <i>bona fide</i> and non- <i>bona fide</i> treatments, published up to May 2005.                                                                                               | Lack of data for a number of treatments.                                                                                       | Cognitive behavioural therapy was more efficacious than non- <i>bona fide</i> treatments when assessed with directly relevant measures ( $d = 0.570$ , $P < 0.0001$ ). There was no evidence to suggest any difference in efficacy between CBT and other <i>bona fide</i> treatments. <i>Bona fide</i> treatments overall were significantly superior to non- <i>bona fide</i> treatments ( $d = 0.525$ , $p < 0.0001$ ). Full CBT treatments (e.g., adolescent CBT + parent training) were similarly efficacious as component treatment (e.g., adolescent CBT alone).                                                                                                                                                                                                                                                                                         |
| <b>Adults</b>                   |                                                                                                                                                                                     |                                                                                                                                                                                                                                                   |                                                                                                                                |                                                                                                                                                                                                                                                                                                                                                                                                                                                                                                                                                                                                                                                                                                                                                                                                                                                                |

| Study          | Participants                                                                                                 | Methods                                                                                                                                                                                                       | Limitations                                                                                                            | Conclusions                                                                                                                                                                                                                                                                                                                                                                                                                                                                                                |
|----------------|--------------------------------------------------------------------------------------------------------------|---------------------------------------------------------------------------------------------------------------------------------------------------------------------------------------------------------------|------------------------------------------------------------------------------------------------------------------------|------------------------------------------------------------------------------------------------------------------------------------------------------------------------------------------------------------------------------------------------------------------------------------------------------------------------------------------------------------------------------------------------------------------------------------------------------------------------------------------------------------|
| Steinert 2017  | n = 2,751 adult patients with depressive disorders or other mental disorders; follow-up of 0 to 55.5 months. | Meta-analysis of 23 RCTs testing the equivalence of psychodynamic therapy versus other treatments with established efficacy published up to December 2016.                                                    | No trials comparing psychodynamic therapy to therapies other than CBT were identified.                                 | All comparisons were to CBT. The pooled between-group difference for target symptoms at post-treatment was $g = -0.158$ , 90% CI = $-0.236$ to $-0.080$ , $P = 0.026$ , indicating equivalence. Treatments were equivalent for general psychiatric symptoms post-treatment and at follow-up, and psychosocial functioning post-treatment. Moderator analysis showed that results were valid across disorders.                                                                                              |
| Gertler 2015   | n = 77 adults with post-TBI depression; follow-up NR.                                                        | Planned meta-analysis that included only 1 RCT comparing the effectiveness of CBT and supportive psychotherapy, published up to February 2015.                                                                | Lack of data for children; high dropout rate; very limited evidence.                                                   | No studies in children were identified. There was no difference between treatment groups in terms of reduction in depression symptoms or quality of life at post-treatment. High drop-out rate may suggest these treatments are not practical for those with TBI. No compelling evidence in support of either treatment.                                                                                                                                                                                   |
| Linde 2015     | n = 7,024 adult primary care patients with unipolar depressive disorders; follow-up NR.                      | Network meta-analysis of 37 RCTs including 9 psychotherapy conditions to test their comparative efficacy (CBT, IPT, problem-solving, psychodynamic, other, combination therapies), published up to June 2013. | Possible systematic differences in study groups across nodes; low confidence in outcomes; lack of head-to-head trials. | There was no difference in efficacy in terms of response to treatment across the 9 conditions, except that remote therapist-led CBT was superior to face-to-face IPT (OR = 0.60, 95% CrI = 0.37 to 0.95). There was no difference between remote-therapist led, guided self-help, non/minimal contact, and therapist-led CBT. Findings were similar when remission or post-treatment scores were used as the outcome. Credible intervals were often too large to rule out clinically relevant differences. |
| Andersson 2014 | n = 1,053 adults with psychiatric and somatic conditions; follow-up NR.                                      | Meta-analysis of 13 (2 for depression) studies to compare the effectiveness of guided I-CBT and face-to-face CBT (individual or group format), published up to July 2013.                                     | Few studies for each condition (limited power); no analysis of long-term effects.                                      | Pooled between-group treatment effect size was non-significant, indicating equivalence between the two treatments. Analysis specific to the two studies on depression also showed equivalence.                                                                                                                                                                                                                                                                                                             |
| Kriston 2014   | n = 2,657 adults with persistent depressive disorder; follow-up NR.                                          | Network meta-analysis of 15 RCTs of acute psychotherapeutic (CBASP, IPT) or combined interventions (with medication) to test their comparative effectiveness, published up to January 2013.                   | Possible confounding by diagnosis; lack of RCTs on some treatments (e.g., psychodynamic psychotherapy).                | CBASP was more efficacious in terms of response rate than IPT (OR = 0.45, CrI = 0.18 to 0.93). A moderate recommendation can be given to CBASP as acute monotherapy but IPT without medication cannot be recommended.                                                                                                                                                                                                                                                                                      |
| Barth 2013     | n = 15,118 adults with a depressive disorder or an elevated level of depressive                              | Network meta-analysis of 198 RCTs to compare the efficacy of various psychological treatments (CBT, BA, IPT, problem-solving, supportive, social skills, psychodynamic                                        | Variation in robustness of evidence across therapeutic approaches; lack of generalisability                            | Most relative effects of psychotherapeutic interventions were absent to small, and all but one failed to reach statistical significance. Interpersonal therapy was significantly superior to supportive therapy ( $d = -0.30$ , 95% CI = $-0.54$ to $-0.05$ ), but this was based on only 2 studies. Subgroup analysis showed                                                                                                                                                                              |

| Study          | Participants                                                                                                                | Methods                                                                                                                                                                                                                                                             | Limitations                                                                                                                                | Conclusions                                                                                                                                                                                                                                                                                                                                                                                                                                                                                                                                                                                                                                                                                                                                                                                                                                                |
|----------------|-----------------------------------------------------------------------------------------------------------------------------|---------------------------------------------------------------------------------------------------------------------------------------------------------------------------------------------------------------------------------------------------------------------|--------------------------------------------------------------------------------------------------------------------------------------------|------------------------------------------------------------------------------------------------------------------------------------------------------------------------------------------------------------------------------------------------------------------------------------------------------------------------------------------------------------------------------------------------------------------------------------------------------------------------------------------------------------------------------------------------------------------------------------------------------------------------------------------------------------------------------------------------------------------------------------------------------------------------------------------------------------------------------------------------------------|
|                | symptoms; no follow-up.                                                                                                     | therapy) and modes of delivery, published up to November 2012.                                                                                                                                                                                                      | outside Western countries; no long-term outcome data.                                                                                      | that patient characteristics and intervention format had no influence on treatment effects.                                                                                                                                                                                                                                                                                                                                                                                                                                                                                                                                                                                                                                                                                                                                                                |
| Braun 2013     | n = 3,965 adults with a depressive disorder or an elevated level of depressive symptomology; follow-up from 1 to 24 months. | Meta-analysis of 53 RCTs directly comparing two or more <i>bona fide</i> psychological therapies (CBT, BA, IPT, ACT, psychodynamic, supportive, problem-solving, interpersonal, social skills, mindfulness-based CBT therapies, others), published up to June 2012. | Small sample sizes for some studies; inadequate studies to investigate all treatment pairs; potential confounding by unmeasured variables. | CBT, BA, IPT and psychodynamic therapies were equally efficacious at post-treatment, except for supportive therapy which was less efficacious according to patient (Rogers, $g = 0.26$ , 95% CI = 0.02 to 0.49, $P < 0.05$ ) and clinician (non-Rogers, $g = 0.36$ , 95% CI = 0.15 to 0.58, $P < 0.01$ ) ratings. All treatments were equally efficacious for remission, except for supportive therapies which were less efficacious (OR = 0.61, 95% CI = 0.42 to 0.89, $P = 0.010$ ). No difference between treatments was found at follow-up. Subgroup analyses showed a higher efficacy of BA vs. other treatments with increasing age, and CBT appeared to be more efficacious for females than males. CBT appeared to be more efficacious than other treatments when it lasted >90 minutes, while BA was more efficacious when it lasted <90 minutes. |
| Dedert 2013    | n = 7,270 adults with depressive disorder, PTSD, panic disorder, or generalized anxiety disorder; no follow-up analyses.    | Meta-analysis of 47 RCTs (15 for depression) comparing the effectiveness of I-CBT with face-to-face CBT and varying levels of therapist support, published from 1990 to 2013.                                                                                       | Limited available data; insufficient evidence to draw conclusions.                                                                         | Exploratory analysis using indirect comparisons showed an association between higher levels of support and greater treatment effects. Two small studies compared different levels of therapist support directly and found no differences in treatment effect. There were inadequate data (2 studies, 254 participants) to evaluate the differential effect between I-CBT and face-to-face CBT for depression specifically.                                                                                                                                                                                                                                                                                                                                                                                                                                 |
| Hunot 2013     | n = 144 adults with acute depression; follow-up to 2 months.                                                                | Meta-analysis of 3 RCTs comparing the effectiveness of 3 <sup>rd</sup> wave CBT approaches with any other psychological therapy approach (CBT, psychodynamic, behavioural, humanistic, integrative therapies), published up to 2013.                                | Limited evidence in terms of quantity, quality and breadth; low quality of evidence; lack of statistical power.                            | Post-treatment results showed no difference between 3 <sup>rd</sup> wave CBT (ACT and BA) and other psychological therapies for efficacy of clinical response or remission rate. At 2-month follow-up there was no evidence of any difference between 3 <sup>rd</sup> wave CBT and other psychological therapies for clinical response. Quality of evidence was very low as assessed using GRADE.                                                                                                                                                                                                                                                                                                                                                                                                                                                          |
| Shinohara 2013 | n = 955 adults with acute depression; follow-up from 5 weeks to 6 months.                                                   | Meta-analysis of 25 RCTs comparing the effectiveness of various behavioural therapies with any other psychological therapy approach (CBT, 3 <sup>rd</sup> wave CBT, psychodynamic, humanistic, integrative                                                          | Weak evidence base; small sample sizes and large amounts of imputed data.                                                                  | Compared to all other psychological therapies together, behavioural therapy showed no difference in response rate. In subgroup analyses comparing BT to the five other classes of psychotherapies, low-quality evidence showed no difference in treatment response. There was also no difference in remission rates between BT and CBT or humanistic therapies (no data for other therapies). At up to 6 month follow-up, behavioural therapy was inferior to CBT for response (RR =                                                                                                                                                                                                                                                                                                                                                                       |

| Study         | Participants                                                                                                                                                  | Methods                                                                                                                                                                                                                                   | Limitations                                                                                                                                              | Conclusions                                                                                                                                                                                                                                                                                                                                                                                                                                                                                                                                                                                                                                 |
|---------------|---------------------------------------------------------------------------------------------------------------------------------------------------------------|-------------------------------------------------------------------------------------------------------------------------------------------------------------------------------------------------------------------------------------------|----------------------------------------------------------------------------------------------------------------------------------------------------------|---------------------------------------------------------------------------------------------------------------------------------------------------------------------------------------------------------------------------------------------------------------------------------------------------------------------------------------------------------------------------------------------------------------------------------------------------------------------------------------------------------------------------------------------------------------------------------------------------------------------------------------------|
|               |                                                                                                                                                               | therapies), published up to 2010.                                                                                                                                                                                                         |                                                                                                                                                          | 0.76, 95% CI = 0.59 to 0.99) and remission (RR = 0.77, 95% CI = 0.61 to 0.98).                                                                                                                                                                                                                                                                                                                                                                                                                                                                                                                                                              |
| Jakobsen 2012 | n = 741 adults with major depressive disorder; follow-up to 1 year in 1 study.                                                                                | Meta-analysis of 7 RCTs to compare the effectiveness of CBT and IPT, published up to August 2010.                                                                                                                                         | Few included trials; all trials at risk of bias; limited evidence for long-term effects.                                                                 | At treatment completion, the effect of CBT and IPT on depressive symptoms did not differ. There was no difference in risk of 'no remission' across therapies. Only one trial included follow-up data showing no difference between the effect of CBT and IPT on depressive symptoms at 1-year post-treatment.                                                                                                                                                                                                                                                                                                                               |
| Cuijpers 2011 | n = NR adults with depression, no follow-up.                                                                                                                  | Meta-analysis of 173 RCTs to compare the effectiveness of 7 psychological therapy approaches (CBT, BA, IPT, non-directive supportive, problem-solving, interpersonal, social skills therapies) and formats, published up to January 2010. | Though the number of RCTs was large, the number of studies for specific subgroups was small; potential lack of statistical power; no long-term outcomes. | There was no indication that CBT, BA, psychodynamic therapy, problem-solving therapy, and social skills training differ from each other in terms of effectiveness in reducing symptoms of depression. However, IPT was slightly more efficacious than all other therapies combined (d = 0.21, 95% CI = 0.01 to 0.42), and non-directive supportive therapy was slightly less efficacious than all other therapies combined (d = -0.17, 95% CI = -0.32 to -0.03). Treatments in varying formats (face-to-face vs. guided self-help and individual vs. group) appeared to be equally efficacious.                                             |
| Cape 2010     | n = 3,962 adults with anxiety, depression, unspecified common mental health problems, or 'emotional distress'; follow-up NR.                                  | Meta-analysis of 34 RCTs (14 for depression) comparing the effectiveness of various brief psychological therapies (CBT, IPT, counselling, problem-solving therapy, psychodynamic psychotherapy).                                          | Possible publication bias; high heterogeneity.                                                                                                           | For studies of depression and mixed anxiety and depression, there was no difference in effectiveness between counselling and CBT, problem-solving therapy and CBT, or counselling and problem-solving therapy.                                                                                                                                                                                                                                                                                                                                                                                                                              |
| Tolin 2010    | n = 1,981 adults with mental disorders including depression, anxiety, eating disorders, psychosis, and substance use disorders; follow-up to 6 and 12 months. | Meta-analysis of 26 RCTs to test whether the effectiveness of CBT is superior to other <i>bona fide</i> forms of psychotherapy (psychodynamic, supportive, interpersonal therapies), published up to September 2007.                      | Small number of studies for some sub-analyses; findings not robust.                                                                                      | Cognitive behavioural therapy was superior to psychodynamic therapy but not to interpersonal or supportive therapies at post-treatment (d = 0.28, 95% CI - 0.12 to 0.44, P < 0.05) and at 6-month follow-up (d = 0.50, 95% CI = 0.29 to 0.71) and at 12-month follow-up (d = 0.55, 95% CI = 0.30 to 0.81) in terms of scores on measures of primary symptoms. At follow-up there was only one study to compare CBT to IPT or supportive therapy. For anxiety and depressive disorder specifically, the findings were similar. Effect sizes were not significantly associated with the number of sessions or group vs. individual therapies. |

| Study                   | Participants                                                                                         | Methods                                                                                                                                                                                                                                     | Limitations                                                                                                                     | Conclusions                                                                                                                                                                                                                                                                                                                                                                                                                                                                              |
|-------------------------|------------------------------------------------------------------------------------------------------|---------------------------------------------------------------------------------------------------------------------------------------------------------------------------------------------------------------------------------------------|---------------------------------------------------------------------------------------------------------------------------------|------------------------------------------------------------------------------------------------------------------------------------------------------------------------------------------------------------------------------------------------------------------------------------------------------------------------------------------------------------------------------------------------------------------------------------------------------------------------------------------|
| Cuijpers 2010           | n = 810 adults with anxiety or depressive disorders; follow-up to 12 months.                         | Meta-analysis of 21 RCTs (6 for depression) to compare the effectiveness of guided self-help compared to face-to-face psychotherapies, published up to January 2009.                                                                        | Need to investigate applicability to clinical practice; small sample size in some studies; low quality of many studies.         | At post-treatment and at 1-3 months, 4-6 months, and 12-months follow-up, there was no difference in effectiveness between guided self-help and face-to-face psychotherapy.                                                                                                                                                                                                                                                                                                              |
| Cuijpers 2008           | n = 2,757 adults with mild to moderate depression; follow-up to maximum of 24 months.                | Meta-analysis of 53 RCTs comparing the effectiveness of 7 major types of psychological treatment (CBT, BA, IPT, nondirective supportive, problem-solving, psychodynamic, interpersonal, social skills therapies), published up to May 2007. | Inadequate number of studies for all analyses; suboptimal study quality; may not be generalizable to non-Caucasian populations. | There was no strong indication that any of the treatments were more or less efficacious than the others, with the exception of IPT which was somewhat more efficacious (d = 0.20, 95% CI = 0.02, 0.38, P < 0.05) and supportive treatment which was somewhat less efficacious than the other treatments (d = -0.12, 95% CI = -0.30 to -0.01, P < 0.05). There was no evidence that the differences between treatments increased or decreased over time for follow-up of up to 24 months. |
| Nieuwenhuijsen 2008     | n = 247 adult workers (employees or self-employed) with depressive disorders; follow-up to one year. | Planned meta-analysis which included only 1 RCT comparing the effectiveness of worker-directed psychological interventions (problem-solving therapy vs. generic community mental health care), published up to August 2006.                 | Few studies; low quality evidence.                                                                                              | No difference in effectiveness was found for days of sickness absence or depressive symptoms between the two treatments.                                                                                                                                                                                                                                                                                                                                                                 |
| <b>Postpartum women</b> |                                                                                                      |                                                                                                                                                                                                                                             |                                                                                                                                 |                                                                                                                                                                                                                                                                                                                                                                                                                                                                                          |
| Dennis 2007             | n = 788 postpartum women with depressive symptomatology; no follow-up analyses.                      | Meta-analysis of 2 RCTs to compare the effectiveness of psychosocial and psychological interventions, as well as intervention modes, published up to August 2007.                                                                           | Poor methodological quality of studies.                                                                                         | There was no difference in the beneficial effect of reducing depressive symptoms between psychological and psychosocial interventions. There was inadequate evidence to ascertain if group vs. individual approaches were equally efficacious.                                                                                                                                                                                                                                           |
| <b>Older adults</b>     |                                                                                                      |                                                                                                                                                                                                                                             |                                                                                                                                 |                                                                                                                                                                                                                                                                                                                                                                                                                                                                                          |
| Samad 2011              | n = 154 older adults (≥55 years) with depression; follow-up to 3 months.                             | Meta-analysis of 5 RCTs to compare the effectiveness of various psychological therapies (CBT, IPT, psychodynamic and supportive therapies), published up to July 2009.                                                                      | Studies were underpowered to detect differences; short follow-up.                                                               | There was no difference in the self-rated effectiveness of behavioural therapy and cognitive therapy at treatment completion or at 1-3 months follow-up (data combined). The type of health professional did not appear to impact this comparison. Behavioural therapy seemed slightly more effective than brief psychodynamic therapy but this was not significant.                                                                                                                     |



| Study                    | Participants                                                                                                              | Methods                                                                                                                                                                                                                                                               | Limitations                                                                                                                              | Conclusions                                                                                                                                                                                                                                                                                                                                                                                                                                                                                                                                                                                                                                                                                                                                                              |
|--------------------------|---------------------------------------------------------------------------------------------------------------------------|-----------------------------------------------------------------------------------------------------------------------------------------------------------------------------------------------------------------------------------------------------------------------|------------------------------------------------------------------------------------------------------------------------------------------|--------------------------------------------------------------------------------------------------------------------------------------------------------------------------------------------------------------------------------------------------------------------------------------------------------------------------------------------------------------------------------------------------------------------------------------------------------------------------------------------------------------------------------------------------------------------------------------------------------------------------------------------------------------------------------------------------------------------------------------------------------------------------|
| Wilson 2008              | n = 197 older adults (≥55 years) with depression; follow-up from 12 to 16 weeks.                                          | Meta-analysis of 3 RCTs comparing the effectiveness of various psychological therapies (CBT, cognitive, behavioural, psychodynamic therapies), published up to September 2006.                                                                                        | Few trials and small sample sizes; high dropout rates; cannot be generalized to clinical populations (all trials were in the community). | There was no difference in treatment effect between CBT and psychodynamic therapy in terms of reduction in symptoms or clinical response. There was no difference in treatment effect between cognitive and behavioural therapies in terms of reduction in symptoms.                                                                                                                                                                                                                                                                                                                                                                                                                                                                                                     |
| <b>Mixed populations</b> |                                                                                                                           |                                                                                                                                                                                                                                                                       |                                                                                                                                          |                                                                                                                                                                                                                                                                                                                                                                                                                                                                                                                                                                                                                                                                                                                                                                          |
| Burlingame 2016          | n = 6,293 children and adults with a mental disorder amenable to psychological treatment; maximum follow-up of 30 months. | Meta-analysis of 70 studies testing the equivalence of individual and group formats of any <i>bona fide</i> psychological treatments (CBT, behavioural, cognitive, psychodynamic, interpersonal, supportive, mixed, integrative and dialectal behavioural therapies). | Unexplained heterogeneity in some analyses; low power; uncorrected intragroup dependency.                                                | The average effect sizes for primary outcomes for the 46 studies comparing identical treatments and the 21 studies comparing non-identical treatments were non-significant, indicating equivalence. Effects for short, moderate, and long-term follow-up, post-treatment remission and improvement also supported equivalence. Heterogeneity in some analyses not explained by diagnosis.                                                                                                                                                                                                                                                                                                                                                                                |
| Montgomery 2010          | n = 289 adults and older adults with anxiety or depressive disorders; follow-up NR.                                       | Narrative review of 4 studies to compare the effectiveness of cognitive and/or behavioural therapies delivered via paraprofessional compared to a professionally trained therapist, published up to September 2005.                                                   | Small number of included studies; lack of recent studies.                                                                                | It appears that paraprofessional therapists can be effective in delivering CBT. Data from two studies show slight outcome advantages for professionals, but overall paraprofessionals seem to be able to achieve similar outcomes. When CBT was applied more rigorously, patients showed greater improvements in outcome measures.                                                                                                                                                                                                                                                                                                                                                                                                                                       |
| Jorm 2008                | n = 286 children and adults with depression or with a high level of depressive symptoms; follow-up from 1 to 6 months.    | Meta-analysis of 9 RCTs to compare the effectiveness of relaxation compared to other psychological therapies                                                                                                                                                          | Unexplained heterogeneity; lack of functional outcomes; risk of bias in older trials.                                                    | Relaxation produced less effect than psychological (mainly CBT) treatments on self-reported depression at post-treatment (SMD = 0.38, 95% CI = 0.14 to 0.62) and at short-term follow-up (SMD = 0.36, 95% CI = 0.07 to 0.65); there was no difference at long-term follow-up. Three trials showed no difference between relaxation and other psychological treatments on clinician-rated depression at post-intervention or at follow-up. Risk of non-response was higher for relaxation at post-treatment based on self-report (RR = 1.71, 95% CI = 1.25 to 2.34) and clinician measures (RR = 1.96, 95% CI = 1.20 to 3.22), as well as at follow up based on self-report (RR = 1.88, 95% CI = 1.05 to 3.34) and clinician measures (RR = 1.42, 95% CI = 0.91 to 2.21). |
| Henken 2007              | n = 519 individuals (children and                                                                                         | Narrative synthesis of 6 RCTs comparing the effectiveness of                                                                                                                                                                                                          | Limited available evidence.                                                                                                              | There is limited evidence that family therapy is less effective than individual CBT for depressive symptoms, limited evidence that cognitive behavioural family therapy is equally                                                                                                                                                                                                                                                                                                                                                                                                                                                                                                                                                                                       |

1  
2  
3  
4  
5  
6  
7  
8  
9  
10  
11  
12  
13  
14  
15  
16  
17  
18  
19  
20  
21  
22  
23  
24  
25  
26  
27  
28  
29  
30  
31  
32  
33  
34  
35  
36  
37  
38  
39  
40  
41  
42  
43  
44  
45  
46  
47

| Study | Participants             | Methods                                                | Limitations | Conclusions                                                    |
|-------|--------------------------|--------------------------------------------------------|-------------|----------------------------------------------------------------|
|       | adults) with depression. | family therapy compared to CBT or behavioural therapy. |             | effective as behaviour family therapy for depressive symptoms. |

ACT: acceptance and commitment therapy; BA: behavioural activation therapy; CBASP: cognitive behavioural analysis system of psychotherapy; CBT: cognitive behavioural therapy; CI: confidence interval; CrI: credible interval; GRADE: Grading of Recommendations, Assessment, Development and Evaluation; I-CBT: Internet cognitive behavioural therapy; IPT: Interpersonal psychotherapy; NR: not reported; OR: odds ratio; PTSD: post-traumatic stress disorder; RCT: randomised controlled trial; RR: risk ratio; SMD: standardised mean difference; TBI: traumatic brain injury

For peer review only



**Q4. What are the prevention strategies/tactics for reducing self-harm and suicide in children, youth and adults with depression?**

| Study and design                              | Participants                                                                                                                                | Methods                                                                                                                                                                                               | Limitations                                                                                                                                                                                                                                                              | Conclusions                                                                                                                                                                                                                                                                                                        |
|-----------------------------------------------|---------------------------------------------------------------------------------------------------------------------------------------------|-------------------------------------------------------------------------------------------------------------------------------------------------------------------------------------------------------|--------------------------------------------------------------------------------------------------------------------------------------------------------------------------------------------------------------------------------------------------------------------------|--------------------------------------------------------------------------------------------------------------------------------------------------------------------------------------------------------------------------------------------------------------------------------------------------------------------|
| <b>Children, Adolescents and Young Adults</b> |                                                                                                                                             |                                                                                                                                                                                                       |                                                                                                                                                                                                                                                                          |                                                                                                                                                                                                                                                                                                                    |
| Pu 2017<br>Systematic review                  | n = 538 young depressive patients from 7 trials.                                                                                            | Multiple databases were searched until May 2016 for publications examining IPT compared to a control condition in children and adolescents with depression, with meta-analysis performed.             | Small number of included studies, leading to small sample size and low statistical power. Did not find studies in children, and there is potential publication bias. Modified IPT was not examined.                                                                      | No evidence that IPT reduces the risk of suicide, based on this data. IPT appears to be superior to control in treating adolescent depression.                                                                                                                                                                     |
| Das 2016<br>Overview of reviews               | n = NR adolescents and youth (11-24y) from 38 publications, with a variety of mental health concerns.                                       | Multiple databases were searched until December 2015 for systematic reviews looking at mental health interventions in an adolescent population. Quality assessment was performed on included studies. | Findings from school-based studies are limited due to low quality.                                                                                                                                                                                                       | School-based suicide prevention programs indicate that didactic and experiential programs can increase short-term suicide and suicide prevention knowledge, but do not appear to impact suicide-related attitudes or behaviours.                                                                                   |
| Devenish 2016<br>Systematic review            | n = NR adolescents (11-19y) from 35 publications, where adolescents received a psychological intervention to reduce symptoms of depression. | Systematic review of multiple databases up to April 2015 to identify publications examining psychological interventions to prevent or treat depression, where suicidality outcomes were reported.     | High risk of bias in included studies, and limited research to date. High rates of attrition in some types of intervention studies created small sample sizes for analysis, and lack of reporting on comparisons all require the results to be interpreted with caution. | The studies examined in this review suggest that psychological interventions are at least as efficacious as other treatments for depressive symptoms, and shows promise for the treatment suicidality. However, further research is needed.                                                                        |
| Perry 2016<br>Systematic review               | n = 22 adolescents (14-18y) from one trial, reporting previous suicidal ideation.                                                           | Systematic review of multiple databases for online and mobile psychosocial interventions for suicide prevention in young people, with results up to May 2015.                                         | Lack of relevant literature on this topic.                                                                                                                                                                                                                               | The single included study shows promising results, however, more evidence is needed to determine the effectiveness of online and mobile interventions on suicide prevention in youth.                                                                                                                              |
| Bennett 2015<br>Overview of reviews           | n = NR youth (0-24y) from 28 included reviews, focusing on both school-based and non-school-based interventions.                            | Systematic review methodology was applied to locate existing systematic reviews, up to May 2012, of youth suicide prevention intervention, both in and outside of schools.                            | Few RCTs of prevention programs for suicidal youth, with little data on the impact of these programs. Little to no evidence is available for gender differences and other subgroups such as Indigenous youth.                                                            | School-based prevention reviews did not report reduced suicide death, but did report less suicide attempts, ideation, and other measures of suicide risk. Interventions aiming to reduce repeat suicide attempts show promise, but more research is needed to determine the successful elements of these programs. |

| Study and design                   | Participants                                                                                         | Methods                                                                                                                                                               | Limitations                                                                                                                                                                                                             | Conclusions                                                                                                                                                                                                                                    |
|------------------------------------|------------------------------------------------------------------------------------------------------|-----------------------------------------------------------------------------------------------------------------------------------------------------------------------|-------------------------------------------------------------------------------------------------------------------------------------------------------------------------------------------------------------------------|------------------------------------------------------------------------------------------------------------------------------------------------------------------------------------------------------------------------------------------------|
| Hawton 2015<br>Systematic review   | n = 1126 participants from 11 trials (up to 18y) with recent ( $\leq 6$ mo) self-harm episode.       | Systematic review of multiple databases to 30 January 2015, examining psychosocial and pharmacological interventions for self-harm in children and adolescents.       | Conclusions are limited to small range of potential interventions and outcomes. Included trials were of high risk of bias.                                                                                              | There is minimal support for group-based psychotherapy for adolescents who have self-harmed, and therapeutic assessment, mentalization, and dialectical behaviour therapy require further evaluation. More large-scale trials are required.    |
| Katz 2013<br>Systematic review     | n = NR participants from 16 studies (0-18y) enrolled in school-based suicide prevention programs.    | Systematic review of literature up to 2012 examining school-based suicide prevention programs for youth.                                                              | Few programs evaluated reduction of suicide attempts, and few RCTs exist on this topic.                                                                                                                                 | Few evidence-based, school-based suicide prevention programs were identified. A combination of programs may be effective.                                                                                                                      |
| Townsend 2010<br>Systematic review | n = NR participants from 10 studies (mean age 19y).                                                  | Systematic review of multiple databases up to August 2007 to identify interventions for young offenders with mood disorders, anxiety, or self-harm.                   | Included trials are methodologically weak, with short follow-up periods and a wide variety of comparison interventions.                                                                                                 | Group-based CBT may be helpful among young offenders for treatment of depressive symptoms.                                                                                                                                                     |
| <b>Adults</b>                      |                                                                                                      |                                                                                                                                                                       |                                                                                                                                                                                                                         |                                                                                                                                                                                                                                                |
| Hawton 2016a<br>Systematic review  | n = 8480 participants (adults) from 29 studies, where participants had a prior episode of self-harm. | Systematic review of multiple databases until 29 April 2015, examining effectiveness of aftercare interventions for self-harm in adults at reducing future self-harm. | Few trials exist for interventions other than CBT, limiting the ability to draw conclusions.                                                                                                                            | CBT appears to be effective in patients with a history of self-harm. Dialectical therapy reduced frequency of self-harm but not proportion of patients repeating self-harm.                                                                    |
| Hawton 2016b<br>Systematic review  | N = 17,699 participants (adults) from 55 included trials of self-harm interventions.                 | Systematic review of multiple databases until 29 April 2015 of psychosocial treatments for adults who have a history of self-harm.                                    | Data on adverse effects were not reported, and information on subgroups, such as male vs female, was limited.                                                                                                           | CBT reduces the number of patients repeating self-harm, however quality of evidence is low. Dialectical behaviour therapy may reduce the frequency of self-harm in people with multiple episodes. Data on other interventions is inconclusive. |
| Cuijpers 2013<br>Systematic review | n = 616 patients (adults) from 13 studies.                                                           | Systematic review, until January 2012, of psychotherapy for depression that included studies reporting suicidality outcomes.                                          | There are few included studies, resulting in insufficient statistical power to make strong conclusions. Quality of included studies was low, heterogeneity was high, and the studies do not provide long-term outcomes. | Evidence available is insufficient to determine if psychotherapy can reduce the risk of suicidality in depressed patients.                                                                                                                     |

| Study and design                     | Participants                                                                                                         | Methods                                                                                                                                                                                                                                         | Limitations                                                                                                                                                                                                                             | Conclusions                                                                                                                                                                                                                                                                                |
|--------------------------------------|----------------------------------------------------------------------------------------------------------------------|-------------------------------------------------------------------------------------------------------------------------------------------------------------------------------------------------------------------------------------------------|-----------------------------------------------------------------------------------------------------------------------------------------------------------------------------------------------------------------------------------------|--------------------------------------------------------------------------------------------------------------------------------------------------------------------------------------------------------------------------------------------------------------------------------------------|
| Jakobsen 2011<br>Systematic review   | n = 669 participants with major depressive disorder from 12 studies (>17y).                                          | Systematic review with meta-analysis, up to February 2010, of depressive patients receiving either cognitive therapy or no intervention.                                                                                                        | All included studies had high risk of bias. Patient characteristics, including depression severity, differed by trial.                                                                                                                  | Cognitive therapy appears to be effective for depression, but the effect on suicidality is unclear.                                                                                                                                                                                        |
| <b>Elderly</b>                       |                                                                                                                      |                                                                                                                                                                                                                                                 |                                                                                                                                                                                                                                         |                                                                                                                                                                                                                                                                                            |
| Okolie 2017<br>Systematic review     | n = NR elderly participants (≥60y) in 21 included studies.                                                           | A systematic review including publications up to 1 April 2016. Interventions to prevent suicide and suicide ideation in the elderly were examined.                                                                                              | Results are limited to only English publications. Some included studies had overlapping populations.                                                                                                                                    | Primary care and population-based multifaceted interventions, as well as those focused on at-risk elderly individuals in the community may be effective at preventing suicidal behaviour and suicidal ideation in older adults.                                                            |
| Lapierre 2011<br>Systematic review   | n = NR elderly participants (≥60y) in 19 included studies which described 11 unique interventions.                   | Systematic review of interventions of elderly suicidal people, to 2009.                                                                                                                                                                         | NR                                                                                                                                                                                                                                      | Interventions for suicidal elderly people should improve resilience, promote positive aging, engage family and community, and use telecommunication to reach them. Studies evaluating means restriction and physician education are needed. Interventions seemed more successful in women. |
| <b>All ages or age not indicated</b> |                                                                                                                      |                                                                                                                                                                                                                                                 |                                                                                                                                                                                                                                         |                                                                                                                                                                                                                                                                                            |
| Berrouguet 2016<br>Systematic review | n = NR participants from 36 studies, receiving text messaging interventions for a variety of mental health concerns. | Systematic review of applications of text messaging in mental health care, up to May 2015.                                                                                                                                                      | Baseline use of technology varied greatly between groups, which might impact the success of a program.                                                                                                                                  | A positive attitude to text messaging interventions was found across conditions. Text messaging was found to be effective in studies looking at suicidal behaviour.                                                                                                                        |
| Meerwijk 2016<br>Systematic review   | n = 13,369 participants from 53 articles reporting on 44 unique trials.                                              | Systematic review of literature to 25 December 2015, for publications comparing interventions that directly target suicidal thoughts and behaviour with those that approach suicide in an indirect way (ex. Hopelessness, depression, anxiety). | Suicide outcomes may not have captured benefits to other areas of mental health. Diagnostic groups were varied, with different medication regimes (which could influence suicide risk). There was heterogeneity between control groups. | Psychosocial and behavioural interventions that directly address suicide are effective in both long and short term, while indirect interventions are only effective in the long term.                                                                                                      |
| Zalsman 2016<br>Systematic review    | n = NR participants from 164 studies.                                                                                | Systematic review of suicide prevention studies, between 1 January 2005 and 31 December 2014.                                                                                                                                                   | Study heterogeneity did not allow meta-analysis.                                                                                                                                                                                        | No strategy appeared to be more effective than others. Combined evidence-based strategies for                                                                                                                                                                                              |

| Study and design                                   | Participants                                            | Methods                                                                                                                                  | Limitations                                                                                                                                                                                                             | Conclusions                                                                                                                                                                                                                                                         |
|----------------------------------------------------|---------------------------------------------------------|------------------------------------------------------------------------------------------------------------------------------------------|-------------------------------------------------------------------------------------------------------------------------------------------------------------------------------------------------------------------------|---------------------------------------------------------------------------------------------------------------------------------------------------------------------------------------------------------------------------------------------------------------------|
| O'Connor 2013<br>Systematic review                 | n = NR participants of all ages in 56 included studies. | Systematic review of literature until 17 July 2012 on screening instruments and treatments for suicide risk in primary care populations. | Populations were high-risk rather than screening-confirmed. Evidence for groups other than adults, and for racial/ethnic minorities was limited.                                                                        | suicide prevention should be tested to determine the best individual and population level options.<br>Psychotherapy may reduce the risk of suicide attempts in high-risk adults, but no effective therapy for high-risk adolescents was identified.                 |
| Van Der Feltz-Cornelis 2011<br>Overview of reviews | n = NR participants from 6 included systematic reviews. | This overview searched for systematic reviews examining intervention to prevent suicidal behaviour.                                      | Unable to generate effect sizes due to provided data. Due to inclusion of systematic reviews only, newer research may have been missed. Most studies were conducted in Europe, which may limit global generalizability. | Evidence-based best practice activities for suicide prevention were identified, however more research is needed to identify synergistic multi-level interventions.                                                                                                  |
| Fountoulakis 2009<br>Systematic review             | n = NR participants from 17 included studies.           | Systematic review of a single database up to January 2008 of suicide prevention in patients with bipolar disorder.                       | NR                                                                                                                                                                                                                      | Three psychosocial strategies appeared successful in this review of the literature: Applying interventions to elicit emergency care at times of distress; Training in problem-solving strategies; and combining comprehensive interventions for suicide prevention. |

CBT: Cognitive behaviour therapy; ex.: example; IPT: interpersonal psychotherapy; mo: months; NR: not reported; RCT: randomized controlled trial; y: years.

Q7. Can diet or exercise affect the development of depression?

| Study and design                                  | Participants                                                                                 | Methods                                                                                                                                                                                                                                                                                                      | Limitations                                                                                                                                                                                                                                                                       | Conclusions                                                                                                                                                                                                                                                                                    |
|---------------------------------------------------|----------------------------------------------------------------------------------------------|--------------------------------------------------------------------------------------------------------------------------------------------------------------------------------------------------------------------------------------------------------------------------------------------------------------|-----------------------------------------------------------------------------------------------------------------------------------------------------------------------------------------------------------------------------------------------------------------------------------|------------------------------------------------------------------------------------------------------------------------------------------------------------------------------------------------------------------------------------------------------------------------------------------------|
| <b>Reviews: Diet and depression</b>               |                                                                                              |                                                                                                                                                                                                                                                                                                              |                                                                                                                                                                                                                                                                                   |                                                                                                                                                                                                                                                                                                |
| Lang 2015 Review                                  | NR                                                                                           | NR – narrative review, methods of identifying studies is not specified.                                                                                                                                                                                                                                      | Most studies are retrospective, meaning mechanisms of dietary interaction or causation cannot be fully explained.                                                                                                                                                                 | Unhealthy Western diet is associated with higher prevalence of depression, while the Japanese and Mediterranean diets are associated with a lower risk of depression. Specific nutrients have been studied, and have been found to have a relationship with depression prevalence.             |
| Williamson 2009 Review                            | NR                                                                                           | NR – narrative review, methods of identifying studies is not specified.                                                                                                                                                                                                                                      | NR                                                                                                                                                                                                                                                                                | The importance of healthy lifestyle habits and good nutrition is emphasized in the literature, especially for older people where poor nutrition status may be common. Health professionals should prioritize supporting the elderly in making healthy lifestyle and dietary choices.           |
| <b>Observational studies: Diet and depression</b> |                                                                                              |                                                                                                                                                                                                                                                                                                              |                                                                                                                                                                                                                                                                                   |                                                                                                                                                                                                                                                                                                |
| Chang 2016 Prospective cohort study               | n = 82,643 women from the Nurses' Health Study, without depression at study entry.           | Dietary intake of flavonoids (and subclasses) was assessed from a FFQ. Incident cases of depression (n = 10,752) at 10 year follow-up were assessed for flavonoid intake, compared to those who did not develop depression, to assess any associations between dietary flavonoid intake and depression.      | FFQ may miss certain foods, or foods could be misclassified due to variations in flavonoid content. There is also the potential for misclassification of depression, likely under ascertainment. Residual confounding, above that controlled for in the analysis, may be present. | Higher intake of flavonoids may be associated with a lower risk of depression, especially among older women. Further research is needed to confirm this association.                                                                                                                           |
| Goinpath 2016 Prospective cohort study            | n = 2,334 participants ≥55 y and 1,952 participants ≥60y, from the Blue Mountains Eye Study. | Participants provided dietary data through a FFQ, and an assessment of depressive symptoms. Information on potential covariates, such as a medical history and lifestyle and health risk behaviours was also collected. Dietary behaviour was assessed for carbohydrate consumption, including GI, GL, total | Potential misclassification due to self-reported dietary intake. Tools for assessing depression are screening tools and not diagnostic. There may be additional confounding factors beyond those controlled for in the analysis.                                                  | There is a modest association between dietary fibre intake and depressive symptoms. Due to the prevalence of depression, it is important to study the relationship between carbohydrate intake and depression further, with RCTs, to determine potential preventative effects in older adults. |

| Study and design                                  | Participants                                                                                                                                                                                                                    | Methods                                                                                                                                                                                                                                                                                                                                                                                                                                         | Limitations                                                                                                                                                                                                                                                         | Conclusions                                                                                                                                                                                                                                                                                                                                                                                                                                                                 |
|---------------------------------------------------|---------------------------------------------------------------------------------------------------------------------------------------------------------------------------------------------------------------------------------|-------------------------------------------------------------------------------------------------------------------------------------------------------------------------------------------------------------------------------------------------------------------------------------------------------------------------------------------------------------------------------------------------------------------------------------------------|---------------------------------------------------------------------------------------------------------------------------------------------------------------------------------------------------------------------------------------------------------------------|-----------------------------------------------------------------------------------------------------------------------------------------------------------------------------------------------------------------------------------------------------------------------------------------------------------------------------------------------------------------------------------------------------------------------------------------------------------------------------|
|                                                   |                                                                                                                                                                                                                                 | carbohydrate consumption, and total sugar intake.                                                                                                                                                                                                                                                                                                                                                                                               |                                                                                                                                                                                                                                                                     |                                                                                                                                                                                                                                                                                                                                                                                                                                                                             |
| Perez-Cornago 2016<br>Prospective cohort study    | n = 14,051 university graduates and professionals. Participants with energy intakes outside of pre-set limits, with chronic disease, or with pre-existing depression were excluded from this analysis. Part of the SUN Project. | Participants were administered a semi-quantitative FFQ at baseline and follow-up (at 4, 6 and 8 years). Dietary intake was assessed for compliance with the DASH diet, and assessed for major depressive disorder. Participants were divided into quintiles based on their diet's comparison to the different aspects of the DASH diet, and rates of depression were assessed for each quintile.                                                | Self-reported clinical diagnosis of depression was accepted, and subtypes/levels of depression were not considered. The compliance with DASH diet indices were self-reported based on the FFQ, and changes to dietary intake in follow-up periods were not updated. | Moderate adherence to some indices for the DASH diet may be associated with a lower risk for depression. Associations are non-linear, requiring further prospective studies to confirm findings before clinical recommendations and generalization can be applied.                                                                                                                                                                                                          |
| Gougeon 2015<br>Prospective cohort study          | n = 1,358 community-dwelling older adults, 67-84y. From a larger cohort. Participants with depression at baseline were excluded.                                                                                                | Dietary assessment was performed at baseline through three 24h dietary recalls, and dietary patterns were analyzed. The Geriatric Depression Scale or new use of antidepressant medication at any year up to the three years of follow-up measured depression incidence. Multiple logistic regression was applied, with adjustments for covariates.                                                                                             | There may have been insufficient variation in diet within this population to observe any differences in depression incidence.                                                                                                                                       | Dietary patterns did not appear related to depression in older adults, however overall intake, possibly reflecting general health decline, is associated with a higher risk of becoming depressed.                                                                                                                                                                                                                                                                          |
| Sanchez-Villegas 2015<br>Prospective cohort study | n = 15,093 university graduates and professionals. Participants with energy intakes outside of pre-set limits, with chronic disease, or with pre-existing depression were excluded from this analysis. Part of the SUN Project. | Participants were administered a semi-quantitative FFQ at baseline and at 10 y follow-up. Dietary patterns were scored for adherence to three diet types: Mediterranean diet, Pro-Vegetarian dietary pattern, and Alternative Health Eating index. Incident cases of depression were the main outcome, and the dietary behaviours of people presenting with depression were compared to those who did not, adjusted for demographic covariates. | Self-reported dietary intake and depression diagnosis. Participants were not representative of the general Spanish population.                                                                                                                                      | Higher adherence scores for all three diet types was associated with a lower risk of depression among Spanish adults. If the potential influence of the Mediterranean diet is removed, the Alternative Health Eating diet demonstrates a much weaker inverse association. There does not appear to be a dose-response relationship, rather a threshold pattern was observed, with the biggest risk reduction occurring between the low and moderate adherence score groups. |
| Chocano-Bedoya 2013                               | n = 50,605 participants from the Nurses'                                                                                                                                                                                        | Participants completed a condensed FFQ at baseline, followed by an expanded FFQ every four years                                                                                                                                                                                                                                                                                                                                                | The development of the dietary patterns involves some arbitrary decisions. Self-report of both                                                                                                                                                                      | This study does not demonstrate a clear association between risk of depression and dietary patterns.                                                                                                                                                                                                                                                                                                                                                                        |



| Study and design                    | Participants                                                                                                                                            | Methods                                                                                                                                                                                                                                                                                                                                          | Limitations                                                                                                                                                                                                                                                                                                              | Conclusions                                                                                                                                                                                                                |
|-------------------------------------|---------------------------------------------------------------------------------------------------------------------------------------------------------|--------------------------------------------------------------------------------------------------------------------------------------------------------------------------------------------------------------------------------------------------------------------------------------------------------------------------------------------------|--------------------------------------------------------------------------------------------------------------------------------------------------------------------------------------------------------------------------------------------------------------------------------------------------------------------------|----------------------------------------------------------------------------------------------------------------------------------------------------------------------------------------------------------------------------|
| Prospective cohort study            | Health Study, without depression at baseline.                                                                                                           | thereafter, between 1980 and 2000. Dietary patterns were evaluated to assess adherence to a prudent or Western dietary pattern. In 2000, participants were asked about antidepressant use and physician-diagnosed depression. Dietary patterns were then assessed for association with depression, with relevant covariates considered.          | diet and depression status may allow for some misclassification.                                                                                                                                                                                                                                                         |                                                                                                                                                                                                                            |
| Lehto 2013 Prospective cohort study | n = 2,317 Finnish men, aged 42-61y, from the Kuopio Ischemic Heart Disease Risk Factor study. Individuals did not have depressive symptoms at baseline. | Participants completed a four-day food record to assess zinc intake. Over 20 years of follow-up, participants who were hospitalized and received a discharge diagnosis of depression were noted, and zinc intake was compared for those who did and did not require a hospitalization.                                                           | The results may not be generalizable to women or patients with depression that does not warrant hospitalization.                                                                                                                                                                                                         | Zinc intake was not found to be associated with depression risk in middle-aged men. Low dietary zinc may not be a precursor to depression in this population.                                                              |
| Li 2011 Prospective cohort study    | n = 2,039 men and 3,029 women followed over 10.6 years. Participants were from the National Health and Nutrition Examination Survey.                    | Participants completed a FFQ based on the previous three months, and completed an assessment for severely depressed mood at baseline and at follow-up. Fish consumption was taken from the FFQ. First consumption was compared for those who did and did not develop severely depressed mood, with analysis accounting for potential covariates. | Limitations include potential bias related to loss-to-follow-up and participants who were excluded due to incomplete records. Assessing fish intake by a single FFQ may introduce errors in dietary assessment, and eating patterns may have changed during the follow-up period prior to the development of depression. | Fish consumption was inversely associated with severely depressed mood in men, but not in women. Further studies are needed to explore this connection, and differences between men and women.                             |
| Lucas 2011 Prospective cohort study | n = 54,632 women, 50-77y old with no depressive symptoms at baseline. Participants were from the Nurses' Health Study.                                  | Participants provided a FFQ for dietary information at four periods during the study. Over 10y of follow-up, incident cases of depression were reported. Diets were examined for consumption of n-3 and n-6 PUFA, linoleic acid and $\alpha$ -linoleic acid.                                                                                     | Due to similar food sources, there may be misclassification of linoleic and $\alpha$ -linoleic consumption. There could also be reverse causation occurring (depression altering diet) and other confounding factors, as well as misclassification of depression diagnosis.                                              | Data collected does not support a link between n-3 PUFA and depression. Higher $\alpha$ -linoleic acid and lower linoleic acid consumption may be associated with a lower depression risk, but further research is needed. |
| Oddy 2011                           | n = 1,407 participants from the Western                                                                                                                 | Adolescents completed a FFQ and the BDI for youth (BDI-Y) at 14y and                                                                                                                                                                                                                                                                             | FFQ data was self-reported, which may limit accuracy of food                                                                                                                                                                                                                                                             | Intake of saturated fat and n-3 PUFA was inversely related to depression                                                                                                                                                   |



| Study and design                                  | Participants                                                                                                                                      | Methods                                                                                                                                                                                                                                                                                           | Limitations                                                                                                                                                                                                                                                                                                                                                                                                                      | Conclusions                                                                                                                                                                                                                                                                                      |
|---------------------------------------------------|---------------------------------------------------------------------------------------------------------------------------------------------------|---------------------------------------------------------------------------------------------------------------------------------------------------------------------------------------------------------------------------------------------------------------------------------------------------|----------------------------------------------------------------------------------------------------------------------------------------------------------------------------------------------------------------------------------------------------------------------------------------------------------------------------------------------------------------------------------------------------------------------------------|--------------------------------------------------------------------------------------------------------------------------------------------------------------------------------------------------------------------------------------------------------------------------------------------------|
| Prospective cohort study                          | Australian Pregnancy Cohort, participants were adolescents aged 14y at first measurement and 17y at final measurement.                            | again at 17 years. Intake of saturated fat, n-3 PUFA, and other dietary and lifestyle factors, were compared to depression scores.                                                                                                                                                                | intake data. Taking depression data only from patient self-report, without parental report, may have underestimated rates of depression in the sample. Participants in study are more likely to be socioeconomically advantaged than the general population, limiting generalizability of results.                                                                                                                               | symptoms. However, these relationships did not remain when total energy intake and other lifestyle factors were accounted for. Previous associations between depression and n-3 PUFA could be due to confounding factors among other dietary and lifestyle factors.                              |
| Sanchez-Villegas 2011<br>Prospective cohort study | n = 12,059 participants free of depression at baseline. Part of the SUN Project.                                                                  | At baseline, participants completed a FFQ to assess dietary SFA, TFA, MUFA, PUFA and culinary fats. Incident cases of depression were reported at follow-up, and participants were assessed based on quintiles of fat intake.                                                                     | Single assessment of dietary intake limits the level of analysis possible. Depression cases were self-reported.                                                                                                                                                                                                                                                                                                                  | Higher TFA intake was associated with increased depression risk, and an inverse association was found between MUFA, PUFA, and olive oil intake and depression risk. Authors suggest that depression and cardiovascular disease may share nutritional determinants with relation to fat subtypes. |
| Colangelo 2009<br>Prospective cohort study        | n = 3,317 men and women in the Coronary Artery Risk Development in Young Adults study. Participants with bipolar disorder at entry were excluded. | Data on diet were collected at baseline, at 7y and 20y by FFQ. Depressive symptoms were assessed at 10y, 15y, and 20y. Other covariates were collected at 10y and 20y. Dietary data were assessed to determine consumption of fish, EPA, and DHA in comparison to depressive symptom development. | Dietary data was collected at 7y but not 10y, when depressive data was collected. This may weaken associations between diet and depressive symptoms. The tool used to assess depression may be weaker than clinical interviews, and participants who were excluded from the analysis had less favourable characteristics at baseline, such as smoking, alcohol consumption, and education, which may influence depression rates. | Intake of fish and sources of n-3 fatty acids may be associated inversely with development of chronic depressive symptoms in women. The same relationship was not demonstrated for men in this cohort.                                                                                           |
| Sanchez-Villagas 2009<br>Prospective cohort study | n = 10,094 participants without depressive symptoms at baseline. Part of the SUN Study.                                                           | Participants answered a FFQ to assess adherence to a Mediterranean diet pattern. At follow-up, incident depression was measured, and compared to Mediterranean diet adherence.                                                                                                                    | Lack of control for potential confounding factors may limit the interpretation of these results. The possibility for reverse causality exists, and the method used to determine                                                                                                                                                                                                                                                  | The Mediterranean dietary pattern may have a protective effect against depressive symptoms. Additional longitudinal studies are required to confirm these findings.                                                                                                                              |

1  
2  
3  
4  
5  
6  
7  
8  
9  
10  
11  
12  
13  
14  
15  
16  
17  
18  
19  
20  
21  
22  
23  
24  
25  
26  
27  
28  
29  
30  
31  
32  
33  
34  
35  
36  
37  
38  
39  
40  
41  
42  
43  
44  
45  
46  
47

| Study and design                                            | Participants                                                                                                                | Methods                                                                                                                                                                                                                                                                                  | Limitations                                                                                                                                                                                                                                       | Conclusions                                                                                                                                                                                                                                                                                                                                       |
|-------------------------------------------------------------|-----------------------------------------------------------------------------------------------------------------------------|------------------------------------------------------------------------------------------------------------------------------------------------------------------------------------------------------------------------------------------------------------------------------------------|---------------------------------------------------------------------------------------------------------------------------------------------------------------------------------------------------------------------------------------------------|---------------------------------------------------------------------------------------------------------------------------------------------------------------------------------------------------------------------------------------------------------------------------------------------------------------------------------------------------|
| clinical depression may have resulted in misclassification. |                                                                                                                             |                                                                                                                                                                                                                                                                                          |                                                                                                                                                                                                                                                   |                                                                                                                                                                                                                                                                                                                                                   |
| <b>Reviews: Exercise and depression</b>                     |                                                                                                                             |                                                                                                                                                                                                                                                                                          |                                                                                                                                                                                                                                                   |                                                                                                                                                                                                                                                                                                                                                   |
| Netz 2017<br>Systematic review                              | n = NR participants from NR studies, adults with depression.                                                                | PubMed was searched up to 2016 for RCTs and meta-analyses and systematic reviews. Studies examined exercise as a treatment for depression, compared to or alongside conventional pharmacological treatments.                                                                             | NR                                                                                                                                                                                                                                                | Majority of studies examining exercise for depression support exercise as a treatment for depression, at least as an adjunct to other forms of treatment. Additional longitudinal studies are required to examine exercise in real life settings, and more research is needed on dose-response for exercise and depression.                       |
| Radovic 2017<br>Systematic review                           | n = 297 participants from 8 included studies, mean ages 12-18y, diagnosed with depressive disorders or depressive symptoms. | Meta-analysis using random effects model. Multiple databases were searched up to 30 January 2015, with duplicate quality assessment. Participants had to receive an intervention of any type of exercise, compared to a control, and depressive symptoms were measured before and after. | High level of between-study heterogeneity, meaning summary effect should be considered with caution. Included studies were generally of low quality, and with a range of control and comparison groups, and the total number of studies is small. | Exercise appears to be effective at improving depressive symptoms among adolescents with clinical depression. Exercise is a low risk treatment, which may have other positive health effects. Exercise will most likely contribute to existing treatments, such as psychotherapy or pharmacotherapy.                                              |
| Carter 2016<br>Systematic review                            | n = 1,449 participants from 11 included studies. Participants were adolescents (13-17y) with depression.                    | Multiple databases and reference lists were searched up to April 2014. RCTs and Non-RCTs were included, and meta-analysis was performed on eight of the included studies. Included studies enrolled participants in a physical activity intervention.                                    | Cannot present a firm recommendation on type and intensity of exercise as a treatment for adolescents due to a limited number of trials.                                                                                                          | Exercise appears to improve symptoms of depression in adolescents. Suggestion for clinical guidance includes supervised light-to-moderate exercise three times per week for 6-12 weeks. Larger trials with sufficient sample size to reduce bias are needed to examine the dose-response relationship for exercise as a treatment for depression. |
| Gartlehner 2016<br>Systematic review                        | n = NR participants from 45 trials. Participants were adult outpatients with major depressive disorder.                     | Multiple databases were searched up to September 2015 for trials examining multiple types of complementary and alternative medicine techniques, as well as exercise, as first and second line intervention for major depressive                                                          | Confidence in the evidence is limited by high drop out rates in the included studies, inequalities in dosing, small sample sizes, and poor adverse event reporting.                                                                               | Studies comparing exercise to antidepressants found no difference in remission rates. Studies examining exercise as an add-on treatment with antidepressants presented mixed results, with one finding no difference and the second showing significant                                                                                           |

| Study and design                  | Participants                                                                                 | Methods                                                                                                                                                                                                                                                                                                                                                                                        | Limitations                                                                                                                                                                                                                                                                                                                                                                                          | Conclusions                                                                                                                                                                                                                                                                                                                             |
|-----------------------------------|----------------------------------------------------------------------------------------------|------------------------------------------------------------------------------------------------------------------------------------------------------------------------------------------------------------------------------------------------------------------------------------------------------------------------------------------------------------------------------------------------|------------------------------------------------------------------------------------------------------------------------------------------------------------------------------------------------------------------------------------------------------------------------------------------------------------------------------------------------------------------------------------------------------|-----------------------------------------------------------------------------------------------------------------------------------------------------------------------------------------------------------------------------------------------------------------------------------------------------------------------------------------|
| Kvam 2016<br>Systematic review    | n = 977 participants from 23 RCTs, adults ≥18y with a depression diagnosis.                  | disorder, compared to antidepressants.<br>Meta-analysis, with random effects model, of RCTs. Articles were found through multiple database search and bibliography searches up to November 2014, and quality assessment was performed. Participants in included studies received an anaerobic intervention, alone or in combination with another depression treatment, or a control condition. | Effect estimate of exercise may have been over-estimated due to use of the largest clinical effect arm in the meta-analysis rather than largest dose. Included studies often had poor quality assessment, and there was high heterogeneity.                                                                                                                                                          | improvement in patients with both exercise and antidepressants.<br>Exercise was an effective treatment for depression when compared to no intervention. Effects were small and insignificant when compared to psychological or pharmacological treatments. It can be considered a viable treatment or adjunct treatment for depression. |
| Qaseem 2016<br>Systematic review  | n = NR patients in NR studies, patients were ≥18y with major depressive disorder.            | This paper presents a guideline, supported by a systematic review. Multiple databases were searched up to September 2015, identifying studies that compared pharmacologic treatment to non-pharmacologic treatment for adults with major depressive disorder.                                                                                                                                  | Limited data on population subgroups for treatments for depression, and insufficient evidence for many of the other treatments identified.                                                                                                                                                                                                                                                           | Overall recommendations of this guideline were to select cognitive behavioural therapy or antidepressants for treatment of major depressive disorder. For exercise specifically, low quality evidence found no difference in response to exercise compared to second generation antipsychotics, and no difference in remission.         |
| Rhyner 2016<br>Systematic review  | n = NR patients from 45 included studies. Patients were older adults (≥60y) with depression. | Meta-analysis of included studies, multiple databases searched up to January 2014, with manual search of identified article reference lists. Quality of primary studies was assessed. Included studies examined an exercise intervention compared to a non-exercise control treatment.                                                                                                         | Immediate outcome data was used, without longer term follow-up data presented. Grouping variables were dichotomized, which results in a loss of information (ex. Age as continuous but presented as older or younger). Some data was not possible to capture, around exercise program details, due to lack of reported information in the primary studies. Data was only coded by a single reviewer. | Exercise was associated with a significantly reduced depression score, with no difference between participant age, control group type, or exercise intervention type. This systematic review suggests that older people with depression symptoms can be effectively treated with exercise.                                              |
| Schuch 2016a<br>Systematic review | n = 267 participants from 8 RCTs, older people (≥60y) with depression.                       | Random-effects meta analysis of studies comparing exercise with control for older people with depression. Included studies found                                                                                                                                                                                                                                                               | With only eight included studies, some subgroups were very small. All included studies had a small number of participants,                                                                                                                                                                                                                                                                           | Exercise was associated with a large and significant antidepressant effect in the study population. Moderate intensity exercise, mixed aerobic and                                                                                                                                                                                      |

1  
2  
3  
4  
5  
6  
7  
8  
9  
10  
11  
12  
13  
14  
15  
16  
17  
18  
19  
20  
21  
22  
23  
24  
25  
26  
27  
28  
29  
30  
31  
32  
33  
34  
35  
36  
37  
38  
39  
40  
41  
42  
43  
44  
45  
46  
47

| Study and design                      | Participants                                                                                                       | Methods                                                                                                                                                                                                                                                                                                                                                   | Limitations                                                                                                                          | Conclusions                                                                                                                                                                                                                                                                                                                           |
|---------------------------------------|--------------------------------------------------------------------------------------------------------------------|-----------------------------------------------------------------------------------------------------------------------------------------------------------------------------------------------------------------------------------------------------------------------------------------------------------------------------------------------------------|--------------------------------------------------------------------------------------------------------------------------------------|---------------------------------------------------------------------------------------------------------------------------------------------------------------------------------------------------------------------------------------------------------------------------------------------------------------------------------------|
|                                       |                                                                                                                    | via a Cochrane review published in 2013 and a multiple database search from 2013 to 1 August 2015. Results were adjusted for publication bias. Participants received an exercise intervention or a control condition.                                                                                                                                     | meaning that the subgroup analysis should only be considered a direction for future research and should be considered with caution.  | strength programs, in participants without major comorbidities showed the greatest improvement in depressive symptoms.                                                                                                                                                                                                                |
| Schuch 2016b Systematic review        | n = 1,487 participants from 30 RCTs, participants were adults with primary diagnosis of major depressive disorder. | Included studies were found via a Cochrane review published in 2013 and a multiple database search to capture studies published after that review, up to 1 August 2015. Meta-analysis was performed, with adjustment for publication bias. Participants received an exercise intervention, or control, and had depressive symptoms measured pre and post. | NR                                                                                                                                   | The antidepressant effect of exercise is large and significant, even in those people with major depressive disorder. Reviews showing a lesser effect may have underestimated the benefits due to publication bias, which this review has accounted for. Data strongly support exercise as an evidence-based treatment for depression. |
| de Souza Moura 2015 Systematic review | n = 1,570 patients from 13 included studies, containing adults aged 18-60y with depression.                        | Authors searched multiple databases up to 20 June 2014, examining aerobic exercise compared to other types of exercise and other depression treatments. Risk of bias was assessed for each included study.                                                                                                                                                | Methodological and program heterogeneity limit the ability to make practical recommendations about aerobic exercise program details. | Aerobic exercise contributed to an improvement in depression symptoms in over half of the included studies (69.3%), with the remaining 30.7% showing physiological improvements without change to depressive symptoms.                                                                                                                |
| Meekums 2015 Systematic review        | n = 147 participants from 3 included studies, made up of adults and adolescents with depression.                   | Multiple databases were searched to 2 October 2014 for RCTs studying dance movement therapy for depression. Meta-analysis and risk of bias (Cochrane) assessment were completed.                                                                                                                                                                          | Low quality evidence limits the ability to draw conclusions.                                                                         | Three small trials with low quality evidence did not allow for firm conclusions about dance movement therapy as a treatment for depression. Larger, high quality studies are required.                                                                                                                                                |
| Ranjbar 2015 Systematic review        | n = NR participants from NR studies, with depression.                                                              | Multiple databases were searched to October 2014, looking at the effects of exercise on depression.                                                                                                                                                                                                                                                       | Methodological weakness and inconsistencies in included studies require caution when interpreting conclusions.                       | Evidence shows that exercise may benefit patients, specifically those ≤20y or ≥40y, with higher educational and physical status, females, untrained patients, and those with mild to moderate depression.                                                                                                                             |
| Josefsson 2014 Systematic review      | n = 720 participants included in meta-analysis (from 13/15 included studies).                                      | Multiple databases were searched for publications examining exercise interventions compared to no treatment, placebo, or usual care, up                                                                                                                                                                                                                   | NR                                                                                                                                   | While it is difficult to determine how effective exercise is in depressive symptom reduction, this study recommends exercise for people with                                                                                                                                                                                          |

| Study and design                     | Participants                                                                                     | Methods                                                                                                                                                                                                                                                 | Limitations                                                                                                                                                                                | Conclusions                                                                                                                                                                                                                                                                                                                                                                                    |
|--------------------------------------|--------------------------------------------------------------------------------------------------|---------------------------------------------------------------------------------------------------------------------------------------------------------------------------------------------------------------------------------------------------------|--------------------------------------------------------------------------------------------------------------------------------------------------------------------------------------------|------------------------------------------------------------------------------------------------------------------------------------------------------------------------------------------------------------------------------------------------------------------------------------------------------------------------------------------------------------------------------------------------|
|                                      | Participants had both clinical and nonclinical depression.                                       | to April 2012, with additional hand searching of specific journals. Meta analysis was performed and methodological quality of included studies was assessed.                                                                                            |                                                                                                                                                                                            | mild to moderate depression who are physically healthy and sufficiently willing and motivated to participate in an exercise program.                                                                                                                                                                                                                                                           |
| Mura 2014<br>Systematic review       | n = 1,101 participants from 13 included studies, diagnosed with depression.                      | Multiple databases were searched until April 2013 for studies examining exercise as an adjunct treatment to antidepressant medications, compared to standard treatment, no treatment, or placebo. Quality assessment of included studies was performed. | Included studies have a variety of methodological weaknesses which could devalue the results.                                                                                              | Exercise appears to be an effective strategy to improve the effect of antidepressant medications in major depressive disorder, and appears to be appropriately and safely used in a real-life context.                                                                                                                                                                                         |
| Park 2014<br>Systematic review       | n = NR patients with depression.                                                                 | Multiple databases searched for data on multiple complementary therapies for depression, for development of guideline evidence. Exercise compared to placebo or antidepressants was one question explored.                                              | Lack of evidence from studies conducted within Korea (for Korean guideline).                                                                                                               | Exercise can be recommended for adults with mild to moderate depression (strong evidence). Exercise therapy that is structured may be used as a non-pharmacological treatment for mild or moderate depression (extrapolated evidence).                                                                                                                                                         |
| Cooney 2013<br>Systematic review     | n = 2,326 participants from 39 included trials. Participants were adults with depression.        | Multiple databases were searched up to 13 July 2012 for RCTs comparing exercise to standard, no, or placebo treatment. Meta-analysis and risk of bias (Cochrane) assessment were completed.                                                             | Quality of some included studies is low, which limits confidence in the findings.                                                                                                          | Exercise was moderately more effective than control at reducing depressive symptoms when assessing all studies, with a smaller effect in methodologically rigorous studies. Exercise compared to psychological or pharmacological therapies is no more effective based on the small sample available.                                                                                          |
| Danielsson 2013<br>Systematic review | n = 1,139 participants from 14 included studies. Participants were adults with major depression. | Multiple databases were searched until August 2012 for studies containing depressive patients and an exercise intervention. Quality of the included evidence was assessed.                                                                              | Small number of included studies limits the interpretation of the results, as well as the heterogeneity in program length and follow-up measurements demonstrated in the included studies. | Exercise seems beneficial for depression, when combined with medication, with aerobic exercise showing no greater benefit than other types of physical activity. Previous studies have not addressed the potential risks of exercise, such as injuries or cardiac events, and further research is needed to determine the successful components of a physical activity regimen for depression. |

| Study and design                                                   | Participants                                                                                                                    | Methods                                                                                                                                                                                                                                                                                                      | Limitations                                                                                                                                                                    | Conclusions                                                                                                                                                                                                                                                                                                                  |
|--------------------------------------------------------------------|---------------------------------------------------------------------------------------------------------------------------------|--------------------------------------------------------------------------------------------------------------------------------------------------------------------------------------------------------------------------------------------------------------------------------------------------------------|--------------------------------------------------------------------------------------------------------------------------------------------------------------------------------|------------------------------------------------------------------------------------------------------------------------------------------------------------------------------------------------------------------------------------------------------------------------------------------------------------------------------|
| Mura 2013<br>Systematic review                                     | n = 1,318 participants from 10 studies. Participants were >60y with depression.                                                 | A single database was searched until January 2013 for RCTs on exercise as an adjunctive treatment for depressive symptoms in older adults. Quality assessment was carried out on the included studies.                                                                                                       | There is heterogeneity among intervention and control groups for exercise interventions, and general poor quality of studies in this group among older adults.                 | Due to a lack of high quality research, there have been few advances in the study of efficacy of exercise as a treatment for depression in older adults, over the past 20 years. The most promising results are found when exercise is combined with antidepressants in those with treatment-resistant late life depression. |
| Ravindran 2013<br>Systematic review                                | n = NR; participants with depression, anxiety, and bipolar disorder were examined.                                              | A single database was searched for publications examining multiple complementary and alternative therapies, up to December 2012, including exercise and yoga, as an add on for depression treatment.                                                                                                         | Heterogeneity between studies in form of exercise limit the interpretation of these results. Methodological weakness limits generalizability of yoga studies.                  | There is Level 3 evidence (prospective uncontrolled studies/case series/high quality retrospective studies) supporting exercise and/or yoga as an adjunct treatment for depression, along with pharmacotherapy.                                                                                                              |
| Herring 2012<br>Systematic review                                  | n = 10,534 patients from 90 included studies. Patients were sedentary adults with chronic disease.                              | Meta-regression of RCTs, multiple databases searched up to June 1, 2011, with manual search of reference lists. Quality of primary studies assessed. Participants in included studies had depression outcomes measured before and after an exercise program.                                                 | Analysis did not permit testing of the minimal/optimal effective dose for exercise program.                                                                                    | Exercise was found to reduce depressive symptoms in patients with chronic disease. The largest antidepressant effects were found in those with mild-to-moderate depression.                                                                                                                                                  |
| Shivakumar 2011<br>Systematic review                               | n = NR patients from NR studies, examining pregnant women with depression.                                                      | Systematic review of multiple publication types examining exercise during pregnancy and the impact on pregnant women with depressive symptoms, including publications up to January 2010.                                                                                                                    | NR                                                                                                                                                                             | There are no randomized trials of exercise for treatment of depression in pregnant women. Observational studies reported a reduction in anxiety and depression with regular exercise during pregnancy.                                                                                                                       |
| <b>Randomized controlled trials: Diet, exercise and depression</b> |                                                                                                                                 |                                                                                                                                                                                                                                                                                                              |                                                                                                                                                                                |                                                                                                                                                                                                                                                                                                                              |
| Serrano Ripoll 2015<br>RCT*                                        | n = 273 primary care patients ≥ 18 y, with depressive symptoms, received intervention or control, with follow up at 6 and 12 m. | Participants randomized to six months of following an active group intervention, advising on sleep patterns, 1h of walking per day, 2h sunlight exposure per day, and a healthy, balanced diet (specific recommendations included), or a control condition where the same four topics were mentioned without | Unable to monitor whether patients carried out recommendations. Interventions may be too difficult for depressed patients to carry out independent of support and supervision. | Participants in both groups had improved depression scores, with no significant difference between the two. Providing written lifestyle recommendations to depressive patients without support and supervision is not sufficient to provide benefit to the patients.                                                         |



| Study and design      | Participants                                       | Methods                                                                                                                                                                                                                                                                                                                                                                                                                                                                                                                              | Limitations                                                              | Conclusions                                                                                                             |
|-----------------------|----------------------------------------------------|--------------------------------------------------------------------------------------------------------------------------------------------------------------------------------------------------------------------------------------------------------------------------------------------------------------------------------------------------------------------------------------------------------------------------------------------------------------------------------------------------------------------------------------|--------------------------------------------------------------------------|-------------------------------------------------------------------------------------------------------------------------|
| Garcia-Toro 2012 RCT* | n = 80 nonseasonal depressive outpatients, ≥ 18 y. | specific recommendations (ex. participants instructed to do what they think would make them feel better).<br>Participants randomized to six months of following an active group intervention, advising on sleep patterns, 1h of walking per day, 2h sunlight exposure per day, and a healthy, balanced diet (specific recommendations included), or a control condition where the same four topics were mentioned without specific recommendations (i.e. participants instructed to do what they think would make them feel better). | Small sample size, poor homogeneity participants' of affective disorders | Lifestyle recommendations (sleep, exercise, sunlight exposure, diet) can effectively complement antidepressant therapy. |

BDI: Beck Depression Inventory; DASH diet: Dietary Approaches to Stop Hypertension diet; DHA: docosahexaenoic acid; EPA: eicosapentaenoic acid; ex.: example; FFQ: food frequency questionnaire; GI: Glycemic index; GL: glycemic load; h: hour; m: months; MUFA: monounsaturated fatty acids; n-3: omega-3; n-6: omega-6; NR: not reported; PUFA: omega-3/omega-6 polyunsaturated fatty acids; RCT: randomized controlled trial; SFA: saturated fatty acids; TFA: trans unsaturated fatty acids; y: years

\*Garcia-Toro 2012 is a pilot study of the same program being tested in Serrano Ripoll 2015

^Four narrative reviews are not included in the Appendix due to the quantity of SRs that provided a more in-depth analysis of the evidence on this topic.



**Q8. What are the functional, social, intellectual, physical and psychological problems experienced by children and teens living with an immediate family member who has depression?**

| Study / Included                                  | Participants                                                                                 | Methods                                                                                                                                                                                             | Limitations                                                                                                                                                                                                                                                                                            | Conclusions                                                                                                                                                                                                                                                                                                                                                                                                                                                                                                                                                                                                                                                                                                                                          |
|---------------------------------------------------|----------------------------------------------------------------------------------------------|-----------------------------------------------------------------------------------------------------------------------------------------------------------------------------------------------------|--------------------------------------------------------------------------------------------------------------------------------------------------------------------------------------------------------------------------------------------------------------------------------------------------------|------------------------------------------------------------------------------------------------------------------------------------------------------------------------------------------------------------------------------------------------------------------------------------------------------------------------------------------------------------------------------------------------------------------------------------------------------------------------------------------------------------------------------------------------------------------------------------------------------------------------------------------------------------------------------------------------------------------------------------------------------|
| <b>Systematic Review with Meta-analysis</b>       |                                                                                              |                                                                                                                                                                                                     |                                                                                                                                                                                                                                                                                                        |                                                                                                                                                                                                                                                                                                                                                                                                                                                                                                                                                                                                                                                                                                                                                      |
| Sui 2016                                          | n = 974 mothers with PND and n = 5596 mothers without PND from 9 prospective cohort studies. | Meta-analysis of prospective cohort studies reporting IQ among children of PND mothers and non-PND mothers for all years up to December 2013.                                                       | Among the included studies only one had a relatively large sample size and numbers in each of the subgroups was small; although the majority of the primary studies were high quality most did not adequately control for confounding factors; the method of diagnosing PND varied in primary studies. | Children of PND mothers had significantly lower full IQ scores than those of non-PND mothers (WMD = -4.384; 95%CI, -6.715 to -2.053; p = .001); heterogeneity across studies was marginally significant (I <sup>2</sup> = 51.9%, p = .052); for verbal IQ the SMD between children of PND mothers and those of non-PND mothers was -0.361 (95% CI, -0.564 to -0.158; p < .001); no significant results were found for subgroup analysis of socioeconomic status, child's age at evaluation, study quality, or diagnostic method of postnatal depression.                                                                                                                                                                                             |
| Goodman 2011                                      | n = 80,851 mother-child dyads from 193 prospective studies.                                  | Meta-analysis of studies presenting quantitative data on the association between maternal depression and the child outcomes of interest published between 1982 and 2009.                            | Minimal information about included studies; most studies sampled largely homogeneous, middle- and upper-middle income, predominantly Caucasian families; this meta-analysis does not address any causal associations.                                                                                  | Maternal depression was more strongly associated with children internalizing problems than with negative emotion/behaviour (g = .21, p < .001) or positive emotion/behaviour (g = .30, p < .001). Maternal depression was more strongly associated with their children's general psychopathology than with their externalizing problems (g = -.05, p < .01) and than their negative (g = .22, p < .001) and positive emotion/behaviour (g = .30, p < .001). Maternal depression was more strongly associated with externalizing problems than with negative (g = .17, p < .001) or positive affect/behaviour (g = .25, p < .001) and more strongly associated with negative affect/behaviour than with positive affect/behaviour (g = .08, p < .05). |
| <b>Systematic Review with Narrative Synthesis</b> |                                                                                              |                                                                                                                                                                                                     |                                                                                                                                                                                                                                                                                                        |                                                                                                                                                                                                                                                                                                                                                                                                                                                                                                                                                                                                                                                                                                                                                      |
| Sanger 2015                                       | n = 13,199 families across 8 cohorts (16 studies) with a mean follow-up of 14 years.         | Narrative synthesis examining if maternal PND is associated with offspring psychological (cognitive, externalising, internalising, psychosocial, and psychiatric) outcomes up until September 2013. | Many of the primary studies reported relatively high drop-out rates at follow-up.                                                                                                                                                                                                                      | <i>Cognitive</i> (n=4 studies): overall studies found significant association between PND and cognitive outcomes (i.e., IQ scores, secondary school completion); <i>internalizing problems</i> (n=10), <i>externalizing problems</i> (n=7): studies found either weak or no significant results between PND and offspring internalizing and externalising problems; <i>psychopathology</i>                                                                                                                                                                                                                                                                                                                                                           |

|                |                                                                                            |                                                                                                                                                                                                                                                       |                                                                                                                                                                                                                                                                                                                                                                                                                                                                   |                                                                                                                                                                                                                                                                                                                                                                                                                                                                                                                                                                                                                                                             |
|----------------|--------------------------------------------------------------------------------------------|-------------------------------------------------------------------------------------------------------------------------------------------------------------------------------------------------------------------------------------------------------|-------------------------------------------------------------------------------------------------------------------------------------------------------------------------------------------------------------------------------------------------------------------------------------------------------------------------------------------------------------------------------------------------------------------------------------------------------------------|-------------------------------------------------------------------------------------------------------------------------------------------------------------------------------------------------------------------------------------------------------------------------------------------------------------------------------------------------------------------------------------------------------------------------------------------------------------------------------------------------------------------------------------------------------------------------------------------------------------------------------------------------------------|
|                |                                                                                            |                                                                                                                                                                                                                                                       |                                                                                                                                                                                                                                                                                                                                                                                                                                                                   | (n=2): no significant associations were found between exposure to maternal PND and offspring DSM-IV psychiatric diagnoses (depression, anxiety, ODD, CD, ADHD, bipolar disorder, eating disorders, and psychosis) at follow-up (OR=1.25, 95 % CI=0.51–3.10); offspring of mothers with PND were four times more likely to meet a psychiatric diagnosis than offspring in the control group (OR=4.0, p<.01); <i>psychosocial development</i> (n=2): PND was associated with lower offspring Social Competence scores at 16 years; female offspring who were exposed to PND experienced elevated levels of emotional sensitivity at age 13 (F=10.73, p=0.01). |
| Waters 2014    | n = 40,843 mothers from 26 prospective studies.                                            | Narrative synthesis of primary studies assessing the impact of antenatal depression on children's cognitive, behavioural, emotional, psychiatric, neuroendocrine, nervous system, and brain-related outcomes; searched all years up to December 2013. | Common methodological problem of the included studies is the reliance on mothers' reports of variables, potentially giving rise to biased maternal reports of child outcomes; inconsistent findings in studies likely reflect methodological differences between studies as well as other limitations including sampling problems, measurement inconsistencies, and variability across studies regarding the presence of unmeasured residual confounding factors. | A consistent finding that antenatal depression effected children's conduct problems and antisocial behaviour, with adverse offspring outcomes demonstrated in infancy, childhood and adolescence; for cognitive outcomes the results are contradictory, reporting either no effect or small effects that attenuate following adjustment for other antenatal or postnatal risk factors; women who are depressed during pregnancy and their children are typically exposed to multiple risk factors.                                                                                                                                                          |
| Lampard 2014   | n = 59,658 children across 7 cohorts (9 studies) with a follow-up range from 1 – 12 years. | Narrative synthesis examining prospective studies on the association between maternal episodic and chronic depression and child weight outcomes, for all years up to January 2013.                                                                    | Heterogeneity in the results for BMI and indicators of adiposity; across included studies, the ascertainment of exposure to maternal depression was weak.                                                                                                                                                                                                                                                                                                         | Episodic maternal depression and risk for child overweight or obesity failed to observe an effect; results suggest that chronic depression may play an important role in a child being overweight.                                                                                                                                                                                                                                                                                                                                                                                                                                                          |
| Hendricks 2012 | n = 8,455 parent/child dyads from 13 cohort and cross-sectional studies with a mean        | Narrative synthesis and qualitative thematic analysis, included articles with relevance to maternal depression and early childhood aggression (age 0-6)                                                                                               | Difficult to control for many confounders in primary studies; many of the studies included diverse populations.                                                                                                                                                                                                                                                                                                                                                   | Found that when maternal depression exists, early childhood aggression is more likely to occur; mothers with depression exhibited forms of negative parenting behaviours including emotional withdrawal, maternal                                                                                                                                                                                                                                                                                                                                                                                                                                           |

1  
2  
3  
4  
5  
6  
7  
8  
9  
10  
11  
12  
13  
14  
15  
16  
17  
18  
19  
20  
21  
22  
23  
24  
25  
26  
27  
28  
29  
30  
31  
32  
33  
34  
35  
36  
37  
38  
39  
40  
41  
42  
43  
44  
45  
46  
47

|              |                                                                                                                                              |                                                                                           |                                                                                                                                       |                                                                                                                                                                                                                                                                                                                               |
|--------------|----------------------------------------------------------------------------------------------------------------------------------------------|-------------------------------------------------------------------------------------------|---------------------------------------------------------------------------------------------------------------------------------------|-------------------------------------------------------------------------------------------------------------------------------------------------------------------------------------------------------------------------------------------------------------------------------------------------------------------------------|
|              | follow-up of 23 months to 5 years.                                                                                                           | and empirical studies with a sample size greater than 50; searched between 2000 and 2010. |                                                                                                                                       | intolerance and irritability; all of the articles agree that internal and external influencing factors mediate the relationship between child-bearing depression and early childhood aggression.                                                                                                                              |
| Corriea 2007 | NR; 19 studies (cross-sectional and prospective longitudinal) primarily focused on maternal anxiety with 4 reporting on maternal depression. | Narrative synthesis, included all study designs between 1998 and 2003.                    | Full text reviewed only for articles that could be found in Brazil libraries; few details on included study characteristics provided. | In children at four years of age parental pre- and postnatal depression was responsible for increasing the mean rate of behavioural and emotional problems; findings from one study indicate that maternal anxiety/depression appear as risk factors for the development of psychopathologies during the child's adolescence. |

CI: confidence interval; IQ: intelligence quotient; NR: not reported; ns: not statistically significant; OR: odds ratio; PND: post-natal depression; RCT: randomised controlled trial; RR: risk ratio; SMD: standard mean difference; UK: United Kingdom; US: United States; WMD: weighted mean difference; y: years

For peer review only

### Q9. What interventions are effective in preventing and treating workplace depression and reducing stigma associated with depression in the workplace?

| Study and design                        | Participants                                                                                                           | Methods                                                                                                                                    | Limitations                                                                                                                                                                                      | Conclusions                                                                                                                                                                                                                                                                                                                                                                                                                                                                                                                                                                                                                                                                                            |
|-----------------------------------------|------------------------------------------------------------------------------------------------------------------------|--------------------------------------------------------------------------------------------------------------------------------------------|--------------------------------------------------------------------------------------------------------------------------------------------------------------------------------------------------|--------------------------------------------------------------------------------------------------------------------------------------------------------------------------------------------------------------------------------------------------------------------------------------------------------------------------------------------------------------------------------------------------------------------------------------------------------------------------------------------------------------------------------------------------------------------------------------------------------------------------------------------------------------------------------------------------------|
| <b>Main outcome measure: Depression</b> |                                                                                                                        |                                                                                                                                            |                                                                                                                                                                                                  |                                                                                                                                                                                                                                                                                                                                                                                                                                                                                                                                                                                                                                                                                                        |
| Joyce 2016<br>Meta-review               | N=NR, 20 reviews (481 primary studies).                                                                                | Synthesis of SRs of effectiveness of workplace mental health interventions for anxiety and depression.                                     | Exclusion of occupation specific reviews, studies had small sizes in the treatment groups and there was a lack of randomization.                                                                 | Primary prevention strategies of increased employee control and promotion of physical activity appear to enhance well-being and reduce symptoms of depression and anxiety (moderate evidence). Impact of primary prevention strategies on work-related outcomes is unknown.<br>CBT-stress management as a secondary intervention reduces the impact of work stress (strong evidence) while there is strong evidence <i>against</i> psychological debriefing. There is moderate evidence supporting tertiary interventions with a specific focus on the workplace, such as CBT and exposure therapy for improving individual outcomes, but mixed results for work-related outcomes such as absenteeism. |
| Tan 2014<br>Systematic review           | N=2501 patients from 9 RCTs.                                                                                           | Pooled meta-analysis of RCTs of work place interventions aimed at preventing the development of depression.                                | There were not enough studies to make direct comparisons on which type of intervention is most effective. No studies had a non-depressed sample at baseline and are not true prevention studies. | There is good quality evidence that universally delivered workplace interventions targeting mental health can reduce depression symptoms among workers. There is more evidence for the effectiveness of CBT-based programs than other interventions.                                                                                                                                                                                                                                                                                                                                                                                                                                                   |
| Chu 2014<br>Systematic review           | N=2025 patients from 17 studies (13 RCTs, 2 comparison trials, 2 controlled trials); 2 RCTs were on depression (N=71). | Narrative synthesis of studies examining the effectiveness of workplace physical activity interventions on depression, stress and anxiety. | Outcome measurements for depression were inconsistent across studies.                                                                                                                            | Workplace physical activity programs in combination with a behavior modification program can significantly reduce depression scores, while exercise training alone improves depression scores but not significantly.                                                                                                                                                                                                                                                                                                                                                                                                                                                                                   |
| Dietrich 2012<br>Systematic review      | N=9743 employees in 1 quasi-experimental study, n=667 had depression.                                                  | Narrative summary of existing evidence-based prevention strategies for depression in the workplace.                                        | No randomization, intervention was for staff on sick leave, only one study.                                                                                                                      | Providing psychoeducation along with the diagnosis of depression significantly decreases symptom severity and improves remission rates. Men over the age of 40 appear to benefit more from this intervention than persons under 40, especially women.                                                                                                                                                                                                                                                                                                                                                                                                                                                  |

1  
2  
3  
4  
5  
6  
7  
8  
9  
10  
11  
12  
13  
14  
15  
16  
17  
18  
19  
20  
21  
22  
23  
24  
25  
26  
27  
28  
29  
30  
31  
32  
33  
34  
35  
36  
37  
38  
39  
40  
41  
42  
43  
44  
45  
46  
47

|                                          |                                                                              |                                                                                                                                                                                                                                                      |                                                                                                        |                                                                                                                                                                                                                             |
|------------------------------------------|------------------------------------------------------------------------------|------------------------------------------------------------------------------------------------------------------------------------------------------------------------------------------------------------------------------------------------------|--------------------------------------------------------------------------------------------------------|-----------------------------------------------------------------------------------------------------------------------------------------------------------------------------------------------------------------------------|
| Martin 2009<br>Systematic review         | N=2640 adults in 17 studies (14 RCTs and 3 quasi-experimental studies).      | Meta-analysis on the impact of workplace health promotion interventions on depressive symptoms.                                                                                                                                                      | High heterogeneity between populations and interventions.                                              | A variety of direct and indirect workplace health promotion interventions appear to have a small effect on decreasing depression symptoms.                                                                                  |
| <b>Main outcome measure: absenteeism</b> |                                                                              |                                                                                                                                                                                                                                                      |                                                                                                        |                                                                                                                                                                                                                             |
| Nieuwenhuijsen 2014<br>Systematic review | N=5996 patients from 23 studies, 5 were work-directed interventions (N=544). | Pooled analysis of RCTs and cluster RCTs of interventions aimed at reducing work disability in employees with depression. Work-directed interventions included modified work duties or hours and/or supporting the worker in coping with depression. | Two of the five work-directed studies were rated as a high risk of bias.                               | Adding a work-directed intervention to a clinical depression intervention has a positive effect on sickness absences (moderate evidence) in the medium term. Similar effects on depressive symptoms could not be confirmed. |
| Furlan 2012<br>Systematic review         | N=NR, adults in 14 articles from 10 RCTs and 2 NRS.                          | Narrative summary of existing workplace interventions to manage depression determined by work-related outcomes such as absenteeism.                                                                                                                  | All included studies had a high risk of bias and GRADED as very low quality evidence for all outcomes. | Insufficient evidence to determine effectiveness of workplace interventions to manage depression.                                                                                                                           |

CBT: cognitive behavioural therapy, NR: not reported, NRS: non-randomized study, RCT: randomized control trial, SR: systematic review

**Q10. Are there structural or functional changes in brains due to antidepressant therapy during brain development (in children)?**

| Study and design                  | Participants        | Methods                                                                                                                                                           | Limitations                                                                                                                                                                                                 | Conclusions                                                                                                                                                                                            |
|-----------------------------------|---------------------|-------------------------------------------------------------------------------------------------------------------------------------------------------------------|-------------------------------------------------------------------------------------------------------------------------------------------------------------------------------------------------------------|--------------------------------------------------------------------------------------------------------------------------------------------------------------------------------------------------------|
| Cousins 2015 Review               | NA                  | Narrative review of selected publications relating to neurodevelopment during adolescence and the effects of antidepressants on the adolescent brain.             | Selected review, only addresses the serotonin reuptake inhibitor (SSRI) fluoxetine and not escitalopram due to licensing differences in this population between the UK (country of authorship) and the USA. | Studies on the effects of antidepressants on the brain of adolescents have been mainly based on animal models and suggest an age-dependent response. Only referenced one human study (Tao 2012 below). |
| Tao 2012 Prospective cohort study | n = 15 adolescents. | Measured brain activation in response to changing negative facial expressions in depressed adolescents being treated with fluoxetine compared to normal controls. | Patients with comorbid psychiatric disorders such as anxiety were included which may confound results. Responses to positive emotions were not evaluated.                                                   | Brain activity normalized in the depressed adolescents after 8 weeks of treatment with fluoxetine.                                                                                                     |

NA: not applicable, UK: United Kingdom, USA: United States of America

**Q11. What is the role of the family in the treatment and trajectory of depression?**

| Study and design                            | Participants                                                                                           | Methods                                                                                                                                                                     | Limitations                                                                                                                                                                                           | Conclusions                                                                                                                                                                                                                          |
|---------------------------------------------|--------------------------------------------------------------------------------------------------------|-----------------------------------------------------------------------------------------------------------------------------------------------------------------------------|-------------------------------------------------------------------------------------------------------------------------------------------------------------------------------------------------------|--------------------------------------------------------------------------------------------------------------------------------------------------------------------------------------------------------------------------------------|
| <b>Main diagnosis: Depression</b>           |                                                                                                        |                                                                                                                                                                             |                                                                                                                                                                                                       |                                                                                                                                                                                                                                      |
| Brady 2017 Systematic review                | N= 928 patients with MDD ages 14-85 yrs from 9 studies (10 articles-7 RCTs, 3 within-subject studies). | Narrative synthesis of RCTs and within-subject studies of the evidence for family psychoeducation (FPE) for MDD.                                                            | Population restricted to 14 years and older and only articles and abstracts published in peer-reviewed journals.                                                                                      | Current evidence suggests that FPE interventions lead to improved outcomes for patients and improved well-being for their families (carers). Multi-family FPE is at least as effective and single family FPE for improving outcomes. |
| Stahl 2016 Systematic review                | N= 1870 adults >60 yrs from 10 studies.                                                                | Narrative synthesis of RCTs of interventions that target both a patient with depression and their support person (dyadic interventions).                                    | Majority of studies compared dyadic intervention with usual care rather than single vs. dyadic interventions. Not all patients met the CES-D criteria for clinically significant depressive symptoms. | Dyadic interventions can decrease symptoms with medium effect sizes in patients with MDD and small effect sizes in patients with depressive symptoms.                                                                                |
| Meis 2013 Systematic review                 | Adults from 39 studies (51 RCTs), only 1 (n=35) was on depression.                                     | Narrative synthesis of RCTs of family interventions for adult mental health conditions.                                                                                     | Only 1 RCT (n=35) addressed patients with depression.                                                                                                                                                 | The single RCT on depression found brief couple therapy significantly improved depression symptoms compared to patients on a waitlist with a low strength of evidence.                                                               |
| Henken 2007 Systematic review               | N= 519 patients of all ages from 6 studies.                                                            | Narrative synthesis of RCTs of different types of family therapy and their association with depression symptom levels.                                                      | Available evidence was too heterogeneous and scarce to determine the effectiveness of family therapy on depressive symptoms.                                                                          | Family therapy appears to be more effective than no treatment however the certainty of its effectiveness is unclear.                                                                                                                 |
| <b>Main diagnosis: Cancer</b>               |                                                                                                        |                                                                                                                                                                             |                                                                                                                                                                                                       |                                                                                                                                                                                                                                      |
| Wang 2017 Systematic Review                 | N= 697 adults diagnosed with cancer in 6 studies (6 additional studies did not address depression).    | Meta-analysis of RCTs of the impact of couples therapy on Quality of Life scores of cancer patients and their spouses.                                                      | Small number of studies with significant heterogeneity between studies, results should be considered preliminary.                                                                                     | Couple-based intervention revealed significant improvements in depression scores with psychoeducational interventions yielding larger effects than skill training.                                                                   |
| <b>Main diagnosis: Stroke</b>               |                                                                                                        |                                                                                                                                                                             |                                                                                                                                                                                                       |                                                                                                                                                                                                                                      |
| Vallury 2015 <sup>4</sup> Systematic Review | N=3739 adult stroke survivors in 25 studies.                                                           | Narrative synthesis of RCTs and quasi-experimental designs of the available evidence regarding family-oriented interventions to prevent and manage depression after stroke. | All relevant studies were included regardless of bias or quality, over half had some risk of bias.                                                                                                    | Family-oriented interventions aimed at reducing post-stroke depression can be effective for both patients and caregivers.                                                                                                            |

CES-D: Center for Epidemiologic Studies Depression Scale FPE: Family psychoeducation MDD: Major Depressive Disorder RCT: randomized control trial



# BMJ Open

## EVIDENCE AVAILABLE FOR PATIENT-IDENTIFIED PRIORITIES IN DEPRESSION RESEARCH: RESULTS OF 11 RAPID RESPONSES

|                                 |                                                                                                                                                                                                                                                                                                                                                                                                                                                                                                                                                                                                                                                                                                                                                            |
|---------------------------------|------------------------------------------------------------------------------------------------------------------------------------------------------------------------------------------------------------------------------------------------------------------------------------------------------------------------------------------------------------------------------------------------------------------------------------------------------------------------------------------------------------------------------------------------------------------------------------------------------------------------------------------------------------------------------------------------------------------------------------------------------------|
| Journal:                        | <i>BMJ Open</i>                                                                                                                                                                                                                                                                                                                                                                                                                                                                                                                                                                                                                                                                                                                                            |
| Manuscript ID                   | bmjopen-2018-026847.R1                                                                                                                                                                                                                                                                                                                                                                                                                                                                                                                                                                                                                                                                                                                                     |
| Article Type:                   | Research                                                                                                                                                                                                                                                                                                                                                                                                                                                                                                                                                                                                                                                                                                                                                   |
| Date Submitted by the Author:   | 07-Mar-2019                                                                                                                                                                                                                                                                                                                                                                                                                                                                                                                                                                                                                                                                                                                                                |
| Complete List of Authors:       | Sebastianski, Meghan; University of Alberta Faculty of Medicine and Dentistry Department of Pediatrics , Gates, Michelle; University of Alberta, Pediatrics<br>Gates, Allison; University of Alberta, Department of Pediatrics<br>Nuspl, Megan; University of Alberta Faculty of Medicine and Dentistry Department of Pediatrics<br>Bialy, Liza ; University of Alberta, Department of Pediatrics; University of Alberta, Alberta Research Centre for Health Evidence<br>Featherstone, Robin; University of Alberta, Pediatrics; University of Alberta, Alberta Research Centre for Health Evidence<br>Breault, Lorraine; University of Alberta, Psychiatry<br>Mason-Lai, Ping; University of Alberta<br>Hartling, Lisa; University of Alberta, Pediatrics |
| <b>Primary Subject Heading</b>: | Mental health                                                                                                                                                                                                                                                                                                                                                                                                                                                                                                                                                                                                                                                                                                                                              |
| Secondary Subject Heading:      | Patient-centred medicine, Research methods                                                                                                                                                                                                                                                                                                                                                                                                                                                                                                                                                                                                                                                                                                                 |
| Keywords:                       | Depression & mood disorders < PSYCHIATRY, Rapid Review, Patient-Identified Priorities, Patient Priority Setting Project                                                                                                                                                                                                                                                                                                                                                                                                                                                                                                                                                                                                                                    |
|                                 |                                                                                                                                                                                                                                                                                                                                                                                                                                                                                                                                                                                                                                                                                                                                                            |

SCHOLARONE™  
Manuscripts

1  
2  
3 **1 EVIDENCE AVAILABLE FOR PATIENT-IDENTIFIED PRIORITIES IN DEPRESSION**  
4 **2 RESEARCH: RESULTS OF 11 RAPID RESPONSES**

5  
6  
7 3 Meghan Sebastianski,<sup>1</sup> Michelle Gates,<sup>2</sup> Allison Gates,<sup>2</sup> Megan Nuspl,<sup>1</sup> Liza M. Bialy,<sup>1</sup>

8  
9 4 Robin Featherstone,<sup>1,2</sup> Lorraine Breault,<sup>3</sup> Ping Mason-Lai,<sup>4</sup> Lisa Hartling<sup>1,2</sup>

10  
11  
12 **6 AFFILIATIONS:**

13 7 <sup>1</sup>Alberta SPOR SUPPORT Unit Knowledge Translation Platform, University of Alberta,  
14 8 Edmonton, Alberta, Canada

15 9 <sup>2</sup>Alberta Research Centre for Health Evidence (ARCHE), Department of Pediatrics, University  
16 10 of Alberta, Edmonton, Alberta, Canada

17 11 <sup>3</sup>Department of Psychiatry, Faculty of Medicine & Dentistry, University of Alberta, Edmonton,  
18 12 Alberta, Canada

19 13 <sup>4</sup>Alberta SPOR SUPPORT Unit Patient Engagement Platform, University of Alberta, Edmonton,  
20 14 Alberta, Canada

21  
22  
23  
24  
25 **16 CORRESPONDING AUTHOR:**

26  
27 17 Dr. Lisa Hartling

28 18 4-472 Edmonton Clinical Health Academy

29 19 Department of Pediatrics, Faculty of Medicine and Dentistry, University of Alberta

30 20 11405-87 Avenue, Edmonton AB T6G 1C9

31 21 P: 780-492-6124; E: hartling@ualberta.ca

32  
33  
34 **23 WORD COUNT: 4000**  
35  
36  
37  
38  
39  
40  
41  
42  
43  
44  
45  
46  
47  
48  
49  
50  
51  
52  
53  
54  
55  
56

1  
2  
3 26 **ABSTRACT**  
4

5 27 **OBJECTIVES:** Patient priority setting projects (PPSPs) can reduce research agenda bias. A key  
6  
7 28 element of PPSPs is a review of available literature to determine if the proposed research  
8  
9 29 priorities have been addressed, identify research gaps, recognize opportunities for knowledge  
10  
11 30 translation, and avoid duplication of research efforts. We conducted rapid responses for 11  
12  
13 31 patient-identified priorities in depression to provide a map of the existing evidence.  
14  
15

16 32 **DESIGN:** Eleven rapid responses.  
17

18 33 **DATA SOURCES:** Single electronic database (PubMed).  
19  
20

21 34 **ELIGIBILITY CRITERIA:** Each rapid response had unique eligibility criteria. For study  
22  
23 35 designs we used a step-wise inclusion process that started with systematic reviews (SRs) if  
24  
25 36 available, then randomized controlled trials and observational studies as necessary.  
26  
27

28 37 **DATA EXTRACTION AND SYNTHESIS:**  
29

30 38 Key study characteristics, general findings, and conclusions were extracted by a single reviewer,  
31  
32 39 synthesized narratively and in tabular format.  
33  
34

35 40 **RESULTS:** For all but one of the rapid responses we identified existing SRs (median 7 SRs per  
36  
37 41 rapid response, range 0-179). There were questions where extensive evidence exists (i.e.,  
38  
39 42 hundreds of primary studies), yet uncertainties remain. For example, there is evidence supporting  
40  
41 43 the effectiveness of many non-pharmacological interventions (including psychological  
42  
43 44 interventions and exercise) to reduce depressive symptoms. However, targeted research is  
44  
45 45 needed that addresses comparative effectiveness of promising interventions, specific populations  
46  
47 46 of interest (e.g., children, minority groups), and adverse effects.  
48  
49  
50

51 47 **CONCLUSIONS:** We identified an extensive body of evidence addressing patient priorities in  
52  
53 48 depression, and mapped the results and limitations of existing evidence, areas of uncertainty, and  
54  
55

1  
2  
3 49 general directions for future research. This work can serve as a solid foundation to guide future  
4  
5 50 research in depression and knowledge translation activities. Integrated knowledge syntheses  
6  
7  
8 51 bring value to the PPSP process; however, the role of knowledge synthesis in PPSPs and  
9  
10 52 methodological approaches are not well defined at present.  
11  
12  
13 53

## 14 54 **STRENGTHS AND LIMITATIONS OF THIS STUDY**

- 17 55 • We provide a summary of the existing evidence for 11 patient-identified priority topics in  
18  
19 56 depression research based on rigorous and transparent review methods.  
20  
21  
22 57 • Our application of rapid review methods is a novel approach to verify uncertainties  
23  
24 58 arising from a PPSP.  
25  
26 59 • This work provides a solid foundation to specify future depression research needs and  
27  
28 60 knowledge translation activities.  
29  
30  
31 61 • Our lessons learned from conducting knowledge syntheses for a patient priority setting  
32  
33 62 project will help inform this aspect of the James Lind Alliance methods.  
34  
35  
36 63 • Further work on whether and how to involve patients in the literature review aspect of a  
37  
38 64 PPSP would be beneficial to ensure their perspectives are integrated throughout the  
39  
40 65 process.  
41  
42  
43 66

## 67 INTRODUCTION

68 Worldwide, an estimated 300 million people suffer from depression, a mental health disorder  
69 that is the primary contributor to global disability.<sup>(1)</sup> Although more prevalent in older female  
70 adults, depression can affect all ages, sexes, and ethnicities.<sup>(1, 2)</sup> For the individual, depression  
71 negatively affects physical health and well-being, leading to a reduced quality of life while  
72 exerting a considerable financial burden on society due to lost productivity, workplace  
73 absenteeism and healthcare costs.<sup>(2-6)</sup>

74 Historically, the research agenda has not aligned with patient priorities; research agendas are  
75 often biased toward commercial interests of funders and personal interests of researchers.<sup>(7)</sup> For  
76 example, registered trials comparing drug efficacies are much more common than those  
77 comparing drugs to non-drug therapies (86.3% vs. 2.6%), such as anti-depressants versus  
78 psychotherapy, which may be of more interest to patients.<sup>(7)</sup> Recently, numerous initiatives have  
79 been launched to incorporate the patient voice in health research.<sup>(8-10)</sup>

80 Involving patients with lived experience in research priority setting aids in ensuring research  
81 agendas reflect the interests of both patients and researchers, increasing the use and value of  
82 subsequent knowledge generation and translation.<sup>(7, 11, 12)</sup> With this in mind, the Alberta Strategy  
83 for Patient-Oriented Research (SPOR) SUPPORT Unit Patient Engagement Platform, in  
84 partnership with the Alberta Health Services Addictions and Mental Health Strategic Clinical  
85 Network and the Canadian Depression Research and Intervention Network, undertook the  
86 Alberta Depression Priority Setting Project (ADPSP). The aim of the project was to identify  
87 Albertans' top research priorities in the area of depression. The ADPSP adapted the James Lind  
88 Alliance (JLA) Priority Setting Partnership method to guide the process; detailed methods and

1  
2  
3 89 results are described elsewhere.<sup>(13, 14)</sup> In summary, the ADPSP undertook five steps:  
4  
5 90 identification of a topic and assembly of participants, gathering of research priorities from a  
6  
7 91 public survey, consolidation of proposed priorities, ranking through a second public survey, and  
8  
9  
10 92 a final prioritization process to produce a list of top 11 priorities in depression research (Figure  
11  
12 93 1).

13  
14  
15 94 A key element of any patient priority setting process is a literature review to determine if the  
16  
17 95 proposed research priorities have been previously answered.<sup>(15)</sup> The Knowledge Translation (KT)  
18  
19 96 Platform of the Alberta SPOR SUPPORT Unit undertook a series of rapid responses to examine  
20  
21  
22 97 the extent and nature of existing evidence relating to the ADPSP's top 11 priorities. The goal  
23  
24 98 was to identify research gaps, recognize opportunities for knowledge translation, and prevent  
25  
26 99 duplication of research efforts. The purpose of this paper is to detail the available evidence for  
27  
28  
29 100 the patient-identified priorities in depression, and to discuss our approach to knowledge synthesis  
30  
31 101 in the context of a patient priority setting project (PPSP).

## 32 33 34 102 **METHODS**

35  
36  
37 103 We utilized rapid review methodology adapted from available guidelines <sup>(16)</sup> as it is best suited  
38  
39 104 for reviewing a large body of evidence in a short amount of time. As a first step, we worked with  
40  
41 105 the ADPSP co-lead who was directly involved in the PPSP to identify the PICO components  
42  
43 106 (population, intervention, comparison, outcome) of the priorities and generate researchable  
44  
45 107 questions to guide our syntheses, which is consistent with guidance for conducting PSPPs.<sup>(15)</sup> We  
46  
47 108 undertook 11 rapid responses of nine priorities suitable for knowledge synthesis. One of the  
48  
49 109 priorities (#3, Figure 1) was multi-faceted and divided into three sub-questions, and two health  
50  
51  
52  
53  
54  
55  
56

1  
2  
3 110 services questions (#5 and #6, Figure 1) were better answered by internal health systems data.  
4

5 111 Table 1 details each rapid response question, inclusion and exclusion criteria.  
6  
7

## 8 112 **Search** 9

10  
11 113 Search methods vary for the breadth of available rapid reviews approaches.<sup>(17)</sup> While the JLA  
12  
13 114 recommends the Cochrane Database of Systematic Reviews and a number of guideline Centers,  
14  
15 115 it does not require particular database sources. In consultation with an information specialist, we  
16  
17 116 determined to search PubMed (MEDLINE) as our primary source of evidence as the database  
18  
19 117 indexes reviews (including Cochrane systematic reviews (SRs)), guidelines and trials, and  
20  
21 118 provides broad coverage of depression research with over 25 million references to journal  
22  
23 119 articles in life sciences, with a concentration on biomedicine.<sup>(18)</sup> For each question we searched  
24  
25 120 PubMed via NCBI Entrez (1946-current) for key concepts (Table 1). To moderate the resources  
26  
27 121 required to review a large body of evidence we determined a priori to filter the available  
28  
29 122 evidence based on hierarchies of evidence and relevance of the study design to the research  
30  
31 123 question. The JLA recommends verifying uncertainties with SRs and adding additional sources  
32  
33 124 with robust methodologies as needed.<sup>(15)</sup> We started with SRs, then randomized controlled trials  
34  
35 125 (RCTs), and observational (non-randomized) studies. JLA also suggests using up-to-date  
36  
37 126 evidence which has been published in the last three years, while the rapid review guidelines we  
38  
39 127 adapted suggest a five-year date range.<sup>(16)</sup> We extended it to 10 years to be overly inclusive.  
40  
41 128 Search results were limited to English-language publications from 2007, and were executed for  
42  
43 129 each question between July and October 2017. The search strategies are available in Appendix 1.  
44  
45 130 Records were managed in EndNote X7 (Clarivate Analytics, Philadelphia, Pennsylvania) and  
46  
47 131 screened in Microsoft Office Excel 2016 (Microsoft, Redmond, Washington).  
48  
49  
50  
51  
52  
53  
54  
55  
56



**TABLE 1. KEY QUESTIONS AND INCLUSION/EXCLUSION CRITERIA**

| Question                                                                                                                                                                           | Population                                                                                                                   | Intervention/exposure                                                                                      | Comparison                                                                | Outcomes                                                              | Exclusions                                                                                    |
|------------------------------------------------------------------------------------------------------------------------------------------------------------------------------------|------------------------------------------------------------------------------------------------------------------------------|------------------------------------------------------------------------------------------------------------|---------------------------------------------------------------------------|-----------------------------------------------------------------------|-----------------------------------------------------------------------------------------------|
| 1. Which treatment therapy or method for depression is more successful for long-term remission or recovery?                                                                        | Participants of any age diagnosed with depression                                                                            | ADM, psychotherapy alone or in combination                                                                 | Any other depression treatment                                            | Remission, relapse                                                    | Comparisons of individual ADMs or CAMs                                                        |
| 2. What are the long-term physical implications of pharmacotherapy for treating depression?                                                                                        | Participants of any age diagnosed with depression                                                                            | Current or past treatment with any ADM                                                                     | No ADM treatment or treatment with a different ADM                        | Long term (>1 year) physical harms of ADMs                            | Outcome: Short term harms                                                                     |
| 3a. For various non-pharmacological treatment options, what are the advantages in terms of cost?                                                                                   | Participants of any age with depression                                                                                      | Psychological treatment (psychotherapy, individual or group therapies, psychosocial support)               | Any other psychological treatment                                         | Cost effectiveness of psychological therapies                         | Comparator: pharmacological treatment, treatment as usual or no treatment.                    |
| 3b. For various non-pharmacological treatment options, what are the advantages in terms of safety?                                                                                 | Participants of any age with depression                                                                                      | Psychological treatment (psychotherapy, individual or group therapies, psychosocial support)               | Any other psychotherapeutic treatment                                     | Safety, adverse events, harms                                         | Comparators of pharmacological treatment, treatment as usual, no treatment or CAMs            |
| 3c. For various non-pharmacological treatment options, what are the advantages in terms of effectiveness and relapse prevention?                                                   | Participants of any age with depression                                                                                      | Psychological treatment (psychotherapy, individual or group therapies, psychosocial support)               | Any other psychological treatment                                         | Progression or severity of depression, relapse                        | Intervention: depression prevention;<br>Comparator: ADMs, treatment as usual or no treatment. |
| 4. What are the prevention strategies/tactics for reducing self-harm and suicide in children, youth and adults with depression?                                                    | Participants of any age diagnosed with depression                                                                            | Suicide or self-harm prevention programs                                                                   | None                                                                      | Suicide attempts and self-harm                                        | Pharmacological interventions                                                                 |
| 7. Can diet or exercise affect the development of depression?                                                                                                                      | Participants of any age diagnosed with depression                                                                            | Intervention related to current or modified dietary intake or exercise                                     | Antidepressant pharmacotherapy or a different dietary or exercise program | Development, progression and/or severity of depressive symptoms       | None                                                                                          |
| 8. What are the functional, social, intellectual, physical and psychological problems experienced by children and teens living with an immediate family member who has depression? | Children and/or adolescent participants 18 years of age or younger living with an immediate family member (parent or sibling | No intervention. Exposure is living with an immediate family member who had been diagnosed with depression | None                                                                      | Functional, social, intellectual, physical and psychological problems | None                                                                                          |

1  
2  
3  
4  
5  
6  
7  
8  
9  
10  
11  
12  
13  
14  
15  
16  
17  
18  
19  
20  
21  
22  
23  
24  
25  
26  
27  
28  
29  
30  
31  
32  
33  
34  
35  
36  
37  
38  
39  
40  
41  
42  
43  
44  
45  
46  
47

| Question                                                                                                                                             | Population                                                                                   | Intervention/exposure                                                   | Comparison | Outcomes                                                                                      | Exclusions                                                                                                                      |
|------------------------------------------------------------------------------------------------------------------------------------------------------|----------------------------------------------------------------------------------------------|-------------------------------------------------------------------------|------------|-----------------------------------------------------------------------------------------------|---------------------------------------------------------------------------------------------------------------------------------|
|                                                                                                                                                      | living in the same residence) who had been diagnosed with depression                         |                                                                         |            |                                                                                               |                                                                                                                                 |
| 9. What interventions are effective in preventing and treating workplace depression and reducing stigma associated with depression in the workplace? | Participants of any age with depression                                                      | Workplace interventions                                                 | None       | Change in symptom progression or severity; reduction in stigma                                | Studies with general outcomes of mental health and psychological wellbeing that did not specifically report depression outcomes |
| 10. Are there structural or functional changes in brains due to antidepressant therapy during brain development (in children)?                       | Children and/or adolescent participants 18 years of age or younger diagnosed with depression | Treatment with ADMs                                                     | None       | Structural or functional development of the brain                                             | None                                                                                                                            |
| 11. What is the role of the family in the treatment and trajectory of depression?                                                                    | Participants of any age                                                                      | Involvement of family members in the patient's management of depression | None       | Symptom progression or severity; family's influence on treatment decisions or remission rates | None                                                                                                                            |

133 ADM: antidepressant medication; CAM: complementary or alternative medicine  
134

For peer review only

## 135 **Study Selection**

136 For eight rapid responses we undertook staged screening by study design (SRs first, then RCTs,  
137 then observational studies) dependent on the quantity and level of evidence identified at each  
138 stage (Figure 2). For three rapid responses we screened all study designs. Primary screening (title  
139 and abstract) followed by secondary full text screening was done by a single reviewer based on  
140 a-priori eligibility criteria (i.e. patient characteristics, intervention/exposure, comparisons, and  
141 outcome measures) (Table 1).

## 142 **Data Extraction and Quality Assessment**

143 Key study characteristics, general findings, and conclusions were extracted by a single reviewer.  
144 Included studies were not assessed for quality as the goal was to map all the evidence available  
145 rather than answer a specific question based on the best available evidence;<sup>(19)</sup> however, author-  
146 reported study limitations were extracted and included in the summary tables.

## 147 **Data Synthesis**

148 We synthesized the findings narratively and in tabular format, and presented conclusions in  
149 terms of the quantity and level of the existing evidence and future research needs/priorities.

## 150 **Patient Involvement**

151 Persons with lived experience were members of the ADPSP steering committee and 445  
152 members of the public responded to the ADPSP survey. While the depression research priorities  
153 identified by the ADPSP were the foundation of the rapid responses, patients were not involved  
154 in the knowledge synthesis process which is consistent with PSP guidance.<sup>(15)</sup>

1  
2  
3 **155 RESULTS**  
4  
5

6 **156** Across the 11 rapid responses, we included 158 studies and identified existing SRs for all but  
7  
8 **157** one of the questions (median 7 SRs per rapid response, range 0 to 179) (Figure 2). A narrative  
9  
10 **158** summary of the findings of each rapid response is presented below. The conclusions and  
11  
12 **159** limitations of the existing evidence and future research needs/priorities are outlined in Table 2;  
13  
14 **160** details of each included study are available in Appendix 2.  
15  
16  
17  
18  
19  
20  
21  
22  
23  
24  
25  
26  
27  
28  
29  
30  
31  
32  
33  
34  
35  
36  
37  
38  
39  
40  
41  
42  
43  
44  
45  
46  
47  
48  
49  
50  
51  
52  
53  
54  
55  
56

161

1  
2  
3  
4  
5  
6  
7  
8  
9  
10  
11  
12  
13  
14  
15  
16  
17  
18  
19  
20  
21  
22  
23  
24  
25  
26  
27  
28  
29  
30  
31  
32  
33  
34  
35  
36  
37  
38  
39  
40  
41  
42  
43  
44  
45  
46  
47

**TABLE 2. CONCLUSIONS, LIMITATIONS AND RESEARCH NEEDS IDENTIFIED FROM AVAILABLE EVIDENCE FOR PATIENT-IDENTIFIED PRIORITY QUESTIONS**

| Question                                                                                                    | Number and type of included studies; publication years; total number of studies or participants (median; range)                                            | Conclusions                                                                                                                                                                                                                                                                                                                                                                       | Limitations                                                                                                                                                                                                                                                                                                                                            | Research Needs                                                                                                                                                                                                                                                                                                                                                                                                       |
|-------------------------------------------------------------------------------------------------------------|------------------------------------------------------------------------------------------------------------------------------------------------------------|-----------------------------------------------------------------------------------------------------------------------------------------------------------------------------------------------------------------------------------------------------------------------------------------------------------------------------------------------------------------------------------|--------------------------------------------------------------------------------------------------------------------------------------------------------------------------------------------------------------------------------------------------------------------------------------------------------------------------------------------------------|----------------------------------------------------------------------------------------------------------------------------------------------------------------------------------------------------------------------------------------------------------------------------------------------------------------------------------------------------------------------------------------------------------------------|
| 1. Which treatment therapy or method for depression is more successful for long-term remission or recovery? | 11 SRs<br>2007-2016<br>N=143 studies (2; 1-69 per SR)                                                                                                      | Most reviews reported no difference in the risk of remission for patients treated with ADM, psychotherapies, or combination therapies. Evidence for the comparative effectiveness of various therapies for preventing relapse is mixed.                                                                                                                                           | Despite the availability of multiple evidence syntheses, many of the review-level comparisons were limited to few RCTs with small sample sizes, often at high risk of bias. Between-study heterogeneity in populations, treatments, length of follow up, and definitions of remission and relapse also hindered the development of strong conclusions. | It appears that there is a need for more robustly conducted, transparently reported trials among children, adolescents, and adults comparing various treatments to determine with confidence which therapy is most effective. Subgroup analyses by depression severity and chronicity are needed to inform tailored management strategies.                                                                           |
| 2. What are the long-term physical implications of pharmacotherapy for treating depression?                 | 6 SRs, 1 review<br>2010-2015<br>N=92 studies (14; 12-23 per SR)^<br><br>3 Obs<br>2013-2016<br>n=639,833 participants<br>(109,736; 5,145-523,952 per study) | There appears to be extensive evidence from SRs of observational studies supporting a relationship between ADM use and risk of fracture, but a lack of RCTs has limited the ability to infer causality.<br><br>There appears to be limited evidence from SRs and observational studies for a possible relationship between ADM use and incident diabetes and cardiovascular risk. | Lack of controlling for confounders, heterogeneity in outcome measures, limited number of RCTs (especially those with long-term follow-up)                                                                                                                                                                                                             | It remains unclear whether other physical harms of ADMs may exist, as these have not been reported. Randomized trials with long-term follow-up would strengthen the evidence but the feasibility of these is questionable; at a minimum RCTs should include and systematically gather information on adverse effects. For newer ADMs, continued research is needed for evidence related to long-term physical harms. |
| 3a. For various non-pharmacological treatment options, what are the advantages in terms of cost?            | 4 SRs<br>2010-2016<br>N=7 studies (2; 1-3 per SR)<br><br>10 RCTs<br>2007-2017<br>N= 4796 participants                                                      | We identified comparisons of cost effectiveness between a vast array of psychological therapies, though few were supported by more than one study. Comparative cost effectiveness trials are few considering the multitude of available therapies.                                                                                                                                | Small number of included studies for SRs; methodological limitations (i.e., probable confounding, a lack of control groups, high attrition rates, and limited generalizability outside of the region in which each therapy was studied).                                                                                                               | There is a need for methodologically robust comparative effectiveness trials with cost analyses for the various available therapies (especially those that show promise).                                                                                                                                                                                                                                            |

1  
2  
3  
4  
5  
6  
7  
8  
9  
10  
11  
12  
13  
14  
15  
16  
17  
18  
19  
20  
21  
22  
23  
24  
25  
26  
27  
28  
29  
30  
31  
32  
33  
34  
35  
36  
37  
38  
39  
40  
41  
42  
43  
44  
45  
46  
47

| Question                                                                                                                         | Number and type of included studies; publication years; total number of studies or participants (median; range)                     | Conclusions                                                                                                                                                                                                                                                                                                                                   | Limitations                                                                                                                                                                          | Research Needs                                                                                                                                                                                                                                                                                                                                              |
|----------------------------------------------------------------------------------------------------------------------------------|-------------------------------------------------------------------------------------------------------------------------------------|-----------------------------------------------------------------------------------------------------------------------------------------------------------------------------------------------------------------------------------------------------------------------------------------------------------------------------------------------|--------------------------------------------------------------------------------------------------------------------------------------------------------------------------------------|-------------------------------------------------------------------------------------------------------------------------------------------------------------------------------------------------------------------------------------------------------------------------------------------------------------------------------------------------------------|
| 3b. For various non-pharmacological treatment options, what are the advantages in terms of safety?                               | 2 SRs<br>2013-2015<br>N=26 studies (13; 1-25 per SR)<br><br>6 RCTs<br>2012-2017<br>N=2,124 participants<br>(327; 34 -780 per study) | It appears that most studies comparing psychotherapies for depression do not collect adverse events data. Of those that do, adverse events related to the psychotherapies are infrequently reported. It is possible that data on harms from non-comparative studies exist, but this fell outside the scope of the review.                     | Neither review identified any studies that reported on adverse events. RCTs were heterogeneous with respect to population and the psychotherapies investigated.                      | Considering the paucity of data on the comparative harms of psychotherapies for depression, there is a need for more primary research before definitive conclusions about their safety can be drawn. As above. RCTs should regularly include outcomes related to adverse events, and employ mechanisms to systematically and rigorously collect these data. |
| 3c. For various non-pharmacological treatment options, what are the advantages in terms of effectiveness and relapse prevention? | 27 SRs<br>2007-2017<br>N=881 studies (15; 1-198 per SR)                                                                             | The quantity and breadth of SR evidence indicates a great interest in the comparative effectiveness of various psychological treatments for depression among all age groups.<br><br>Much of the available evidence suggests no significant difference between the various treatments; when differences were detected they tended to be minor. | Shortage of head-to-head trials directly comparing various psychotherapies; therefore, in most cases the quality of the evidence was low or insufficient to draw strong conclusions. | The certainty of the evidence is low or lacking for several therapies. It is unclear where further high quality, adequately powered head-to-head trials would change the conclusions.                                                                                                                                                                       |
| 4. What are the prevention                                                                                                       | 3 Overviews of SRs<br>2011-2016                                                                                                     | Systematic reviews of non-pharmacological strategies for reducing self-harm and                                                                                                                                                                                                                                                               | Shortage of studies addressing different age groups and ethnic or racial populations;                                                                                                | The reviews for children and young people provide some conflicting results,                                                                                                                                                                                                                                                                                 |

| Question                                                                                                                               | Number and type of included studies; publication years; total number of studies or participants (median; range)                                                                                                  | Conclusions                                                                                                                                                                                                                                                                                                                                                                                                                             | Limitations                                                                    | Research Needs                                                                                                                                                                                                                                                                                                                                                                                                                                                                                      |
|----------------------------------------------------------------------------------------------------------------------------------------|------------------------------------------------------------------------------------------------------------------------------------------------------------------------------------------------------------------|-----------------------------------------------------------------------------------------------------------------------------------------------------------------------------------------------------------------------------------------------------------------------------------------------------------------------------------------------------------------------------------------------------------------------------------------|--------------------------------------------------------------------------------|-----------------------------------------------------------------------------------------------------------------------------------------------------------------------------------------------------------------------------------------------------------------------------------------------------------------------------------------------------------------------------------------------------------------------------------------------------------------------------------------------------|
| strategies/tactics for reducing self-harm and suicide in children, youth and adults with depression?                                   | N=72 SRs (28;6-38 per overview)<br>17 SRs<br>2009-2017<br>N=546 studies (19; 1-164 per SR)                                                                                                                       | suicide exist for all ages, with the majority indicating a potential benefit of psychological interventions on depressive symptoms but limited evidence of benefit for suicidality.                                                                                                                                                                                                                                                     | high heterogeneity with respect to populations and interventions investigated. | suggesting that additional work may be needed to identify the most efficacious strategies. Many studies concluded that additional research is needed to examine multifaceted approaches for older adult populations.                                                                                                                                                                                                                                                                                |
| 7. Can diet or exercise affect the development of depression?                                                                          | 27 SRs<br>2009-2017<br>N=352 studies (14;3-90 per SR)<br><br>2 RCTs<br>2012,2015<br>N=353 participants (177; 80-273 per study)<br><br>13 Obs<br>2009-2016<br>N=256,930 patients (10,094; 1,358-82,643 per study) | There is high-level evidence for the use of exercise as a single or adjunct treatment for depression, with study heterogeneity making it difficult to make firm recommendations for specific populations, amount, and type of exercise to produce the greatest patient benefit. A lack of synthesis among dietary studies limit the ability to draw conclusions about diet type or specific diet elements and their role in depression. | High heterogeneity of study quality and types of exercise program components.  | More research on the specific parameters of exercise in each population for effective treatment of depression is needed. While multiple large, observational studies exploring the connection between diet and depression exist, there is a paucity of higher levels of evidence that synthesize the findings. In the existing literature, exercise is approached from the standpoint of treatment for existing depression, and publications examining diet mostly explore its role in development. |
| 8. What are the functional, social, intellectual, physical and psychological problems experienced by children and teens living with an | 7 SRs<br>2007-2016<br>N=285 studies (16;9-193 per SR)                                                                                                                                                            | There was limited evidence and discussion of child outcomes as the majority of the reviews focused on treatment options and interventions for the mothers who have depression. This population of children and mothers are often exposed to multiple risk factors such as partner/parental conflict                                                                                                                                     | Lack of controlling for confounders.                                           | Studies addressing the impact on children who live with a family member with depression are lacking.                                                                                                                                                                                                                                                                                                                                                                                                |



1  
2  
3  
4  
5  
6  
7  
8  
9  
10  
11  
12  
13  
14  
15  
16  
17  
18  
19  
20  
21  
22  
23  
24  
25  
26  
27  
28  
29  
30  
31  
32  
33  
34  
35  
36  
37  
38  
39  
40  
41  
42  
43  
44  
45  
46  
47

| Question                                                                                                                                             | Number and type of included studies; publication years; total number of studies or participants (median; range) | Conclusions                                                                                                                                                                                                                                                                                                                                                                        | Limitations                                                                                                                                                                                     | Research Needs                                                                                                                                                                                                                           |
|------------------------------------------------------------------------------------------------------------------------------------------------------|-----------------------------------------------------------------------------------------------------------------|------------------------------------------------------------------------------------------------------------------------------------------------------------------------------------------------------------------------------------------------------------------------------------------------------------------------------------------------------------------------------------|-------------------------------------------------------------------------------------------------------------------------------------------------------------------------------------------------|------------------------------------------------------------------------------------------------------------------------------------------------------------------------------------------------------------------------------------------|
| immediate family member who has depression?                                                                                                          |                                                                                                                 | and low socioeconomic status making it difficult to draw any causal associations.                                                                                                                                                                                                                                                                                                  |                                                                                                                                                                                                 |                                                                                                                                                                                                                                          |
| 9. What interventions are effective in preventing and treating workplace depression and reducing stigma associated with depression in the workplace? | 7 SRs<br>2009-2016<br>N=560 studies (17;1-481 per SR)                                                           | Workplace interventions appear to have a positive effect on depressive symptoms. There was no single intervention that was identified by the reviews as being the most effective for improving symptoms of depression; however, cognitive behavioural therapy had the most evidence supporting its effectiveness.                                                                  | Small number of participants in the studies; inconsistencies in outcome measurements for depression. When absenteeism was used as proxy measure for depression studies had a high risk of bias. | There is evidence supporting a number of effective workplace interventions that would benefit people with depression. Increased awareness and subsequent implementation of these interventions is likely to improve depressive symptoms. |
| 10. Are there structural or functional changes in brains due to antidepressant therapy during brain development (in children)?                       | 1 review<br>2015<br>Number of studies not reported<br><br>1 Obs<br>2012<br>N=15 patients                        | There is a paucity of human studies addressing the effects of antidepressants on adolescent brain development.                                                                                                                                                                                                                                                                     | Studies included had a number of confounding factors.                                                                                                                                           | There is a need for primary human research studies in this area before any conclusions can be drawn.                                                                                                                                     |
| 11. What is the role of the family in the treatment and trajectory of depression?                                                                    | 6 SRs<br>2007-2017<br>N=95 studies (10; 6-39 per SR)                                                            | Involvement of family members in a therapy or psychoeducation intervention with a patient with depression can positively impact the patient's depressive symptoms. The most effective type of intervention has yet to be determined. There were also reported benefits for families, with an improved quality of life for caregivers including a reduction in depressive symptoms. | Small numbers of included studies with significant heterogeneity between studies and varying quality.                                                                                           | It is unclear which types of family intervention have the greatest impact on a patient's depressive symptoms. Research opportunities on the benefits to families should also be considered.                                              |

1  
2  
3  
4  
5  
6  
7  
8  
9  
10  
11  
12  
13  
14  
15  
16  
17  
18  
19  
20  
21  
22  
23  
24  
25  
26  
27  
28  
29  
30  
31  
32  
33  
34  
35  
36  
37  
38  
39  
40  
41  
42  
43  
44  
45  
46  
47

163 **ADM:** antidepressant medication; **CBT:** cognitive behavioural therapy; **Obs:** Observational studies; **RCT:** randomized controlled trial; **SR:** systematic review  
164 ^The non-systematic review did not report the number of studies included.

For peer review only

1  
2  
3 165 **Q1. Which treatment therapy or method for depression is more successful for long-term**  
4  
5 166 **remission or recovery?**  
6  
7

8 167 **Remission:** The evidence did not support a difference in remission rates among patients treated  
9  
10 168 with antidepressant medication (ADM) compared to cognitive behavioural therapy (CBT),<sup>(20-22)</sup>  
11  
12 169 interpersonal psychotherapy,<sup>(20, 21)</sup> psychodynamic therapy,<sup>(21)</sup> or combination therapies (ADM  
13  
14 170 and CBT).<sup>(21)</sup> One review reported there was insufficient evidence to draw conclusions about  
15  
16 171 ADM effectiveness compared to third-wave CBT.<sup>(21)</sup> Two reviews found no difference in  
17  
18 172 remission rates between patients with treatment-resistant depression who: were treated with  
19  
20 173 ADM or psychotherapy;<sup>(23)</sup> switched from ADM to a new ADM or to cognitive therapy (CT);<sup>(21)</sup>  
21  
22 174 or augmented ADM with a new ADM or with CT.<sup>(21)</sup> For children and adolescents there was  
23  
24 175 insufficient evidence to determine the most effective treatment to induce remission.<sup>(24)</sup>  
25  
26  
27  
28  
29

30 176 **Relapse prevention:** Reduction in relapse risk was found among patients treated with ADM  
31  
32 177 compared to psychotherapy;<sup>(25)</sup> with psychotherapy (alone or in combination with ADM) after  
33  
34 178 response to ADM;<sup>(26)</sup> and with augmentation of treatment as usual (with or without ADM) with  
35  
36 179 mindfulness-based cognitive therapy (MBCT).<sup>(27)</sup> One review found no difference between  
37  
38 180 maintenance ADM and MBCT.<sup>(28)</sup> For children and adolescents, increased relapse risk was  
39  
40 181 reported among patients treated with ADM alone compared to ADM with CBT.<sup>(29)</sup>  
41  
42  
43

44 182 **Q2. What are the long-term physical implications of pharmacotherapy for treating**  
45  
46 183 **depression?**  
47  
48

49 184 The observational SR<sup>(30-34)</sup> findings support a relationship between ADM use and risk of incident  
50  
51 185 fracture that appears to be independent of bone mineral density. Persistence of risk over time is  
52  
53 186 unclear.<sup>(30, 34)</sup> One SR<sup>(35)</sup> supported an association between ADM use and incident diabetes, and  
54  
55  
56

1  
2  
3 187 another<sup>(36)</sup> associated certain ADMs with weight gain, cardiovascular events and fractures. Two  
4  
5 188 cohort studies<sup>(37, 38)</sup> support an association between ADM use and incident cardiovascular risk  
6  
7  
8 189 factors, while one cohort study<sup>(39)</sup> did not support any association between ADM use and incident  
9  
10 190 hepatocellular carcinoma in adults with hepatitis C.

11  
12  
13 191 **Q3a. For various non-pharmacological treatment options what are the advantages in terms**  
14  
15 192 **of cost?**

16  
17  
18 193 Considerable heterogeneity in the types of therapies researched precluded meaningful synthesis.  
19  
20 194 The included studies examined 16 different therapies: behavioural activation,<sup>(40, 41)</sup> CBT,<sup>(41-54)</sup>  
21  
22 195 general counselling,<sup>(43)</sup> person-centred therapy,<sup>(50)</sup> problem-solving therapy,<sup>(54)</sup>  
23  
24 196 psychoanalysis,<sup>(45, 55)</sup> psychoanalytic psychotherapy,<sup>(55)</sup> psychoeducation,<sup>(48, 56)</sup> CBT-enhanced  
25  
26 197 psychoeducation,<sup>(48)</sup> psychologist-enhanced psychoeducation,<sup>(48)</sup> short-<sup>(48, 57)</sup>and long-term<sup>(57)</sup>  
27  
28 198 psychodynamic therapy, psychosocial therapy,<sup>(45)</sup> relaxation therapy,<sup>(42)</sup> self-management  
29  
30 199 therapy,<sup>(56)</sup> and solution-focused therapy.<sup>(48, 57)</sup> The SRs<sup>(42, 43, 48, 51)</sup> each included zero to three  
31  
32 200 studies with relevant comparisons that presented economic data.

33  
34  
35  
36  
37 201 Across all 18 included studies there were 22 different cost effectiveness comparisons; two SRs  
38  
39 202 each included three<sup>(45)</sup> and four<sup>(48)</sup> relevant comparisons, and only two primary studies  
40  
41 203 investigated the same comparison (telephone vs. in-person CBT).<sup>(46, 47)</sup> There were two SRs,<sup>(42, 51)</sup>  
42  
43 204 three RCTs,<sup>(44, 46, 47, 49, 52, 53)</sup> and three observational studies<sup>(44, 46, 53)</sup> that focused specifically on  
44  
45 205 various approaches to the delivery of CBT. Overall, the RCTs and observational studies were  
46  
47 206 hindered by numerous methodological limitations, and given the disparate nature of the  
48  
49 207 comparisons it is not possible to draw conclusions about the comparative cost effectiveness of  
50  
51 208 various treatment options.

1  
2  
3 209 **Q3b. For various psychotherapeutic treatment options what are the advantages in terms of**  
4  
5 210 **safety?**

6  
7  
8 211 One SR investigated CBT compared to supportive psychotherapy for adults with depression  
9  
10 212 following traumatic brain injury.<sup>(58)</sup> Another SR investigated behavioural therapy compared to  
11  
12 213 other psychotherapies for adults with depression.<sup>(59)</sup> Neither SR identified studies that reported  
13  
14 214 adverse events.

15  
16  
17  
18 215 The RCTs were heterogeneous with respect to population and psychotherapies investigated.  
19  
20 216 Populations included adolescent and adult inpatients and outpatients with depression, with and  
21  
22 217 without co-morbid conditions. Psychotherapeutic treatments included behavioural activation,<sup>(41,</sup>  
23  
24 218 <sup>60)</sup> counseling,<sup>(61)</sup> various forms of CBT,<sup>(41, 61-64)</sup> psychoanalytical therapy,<sup>(63)</sup> and psychosocial  
25  
26 219 interventions.<sup>(63)</sup> Two RCTs investigated psychotherapies delivered via different means.<sup>(60, 64)</sup>  
27  
28 220 One RCT reported no difference in adverse events between a brief psychosocial intervention,  
29  
30 221 CBT, and short-term psychoanalytical therapy groups.<sup>(63)</sup> Another RCT reported adverse events  
31  
32 222 that were possibly or probably related to the psychotherapies.<sup>(61)</sup> Mild adverse events were  
33  
34 223 reported in the computerized CBT group (n=1) and the face-to-face CBT group (n=2); eight  
35  
36 224 moderate adverse events (e.g., increased suicidal thinking) were reported in each group. Serious  
37  
38 225 adverse events (suicide attempts) were reported in the computerized CBT group (n=2) and the  
39  
40 226 face-to-face CBT group (n=1). No other adverse events were reported.

41  
42  
43  
44 227 **Q3c. For various non-pharmacological treatment options what are the advantages in terms**  
45  
46 228 **of effectiveness and relapse prevention?**

229 Included SRs<sup>(58, 59, 65-89)</sup> mainly compared psychotherapy or CBT versus other psychotherapies  
230 across several populations (e.g., children, adolescents, adults, postpartum, older adults). There  
231 were also comparisons for varied treatment modalities (e.g., online vs. face-to-face), formats  
232 (e.g., individual vs. group), and level of therapist training. With some exceptions, the available  
233 evidence suggests no significant difference between the treatments under study for post-  
234 treatment effectiveness (i.e., symptom reduction), remission, and continued effectiveness at  
235 varying lengths of follow-up (i.e., relapse prevention). When differences were noted, the effect  
236 estimates were usually small and imprecise.

237 Despite the large number of SRs, they were limited by a shortage of trials directly comparing  
238 various psychotherapies; some therapies were left out entirely. There was less evidence for long-  
239 term treatment effects, and questions remain about which patients would be best suited to the  
240 various treatments.

#### 241 **Q4. What are the prevention strategies/tactics for reducing self-harm and suicide in** 242 **children, youth, and adults with depression?**

243 **Children, adolescents, and young adults:** Eight reviews<sup>(90-97)</sup> examined interventions grouping  
244 children, adolescents, and young adults ( $\leq 24$  years). One SR<sup>(96)</sup> found that interpersonal  
245 psychotherapy reduced depressive symptoms in adolescents, but did not impact suicide. Three  
246 reviews<sup>(90, 91, 94)</sup> examined school-based interventions for suicide reduction; two overviews<sup>(90, 91)</sup>  
247 found some benefit to school-based strategies, while one SR<sup>(94)</sup> found few studies examining this  
248 type of intervention and was unable to draw conclusions. Three SRs<sup>(92, 93, 97)</sup> examined  
249 psychological interventions. One<sup>(92)</sup> concluded that psychological strategies hold promise as a  
250 suicide prevention strategy in this population; one<sup>(93)</sup> found minimal support for group-based

1  
2  
3 251 therapy, while the other<sup>(97)</sup> argued that group-based therapy might be effective in suicide  
4  
5 252 prevention. One SR<sup>(95)</sup> examined online and mobile application interventions and could not draw  
6  
7  
8 253 strong conclusions from the single included study.  
9

10  
11 254 **Adults:** Four SRs<sup>(98-101)</sup> investigated interventions aimed at preventing self-harm and suicide in  
12  
13 255 adults. Two<sup>(99, 100)</sup> found that CBT and dialectical behaviour therapy may be effective at  
14  
15 256 preventing and reducing self-harm in those with previous episodes. One<sup>(98)</sup> was unable to draw  
16  
17 257 conclusions on the effectiveness of psychotherapy for suicidality, and one<sup>(101)</sup> found CBT to be  
18  
19 258 an effective treatment for depressive symptoms, but did not have a clear effect on suicidality.  
20  
21

22  
23 259 **Older adults:** Two SRs<sup>(102, 103)</sup> addressed suicidality in older populations ( $\geq 60$  years). Both  
24  
25 260 found that multifaceted primary care interventions were effective in reducing suicidal behaviour,  
26  
27 261 with one<sup>(102)</sup> reporting a greater effect in women.  
28  
29

30  
31 262 **All ages; age not indicated:** Six reviews<sup>(104-109)</sup> targeted multiple age groups, or did not specify  
32  
33 263 the age group. One SR<sup>(104)</sup> found text messaging interventions were effective in patients  
34  
35 264 contemplating suicide. Three SRs<sup>(105-107)</sup> found psychotherapy-based interventions to be an  
36  
37 265 effective treatment of patients with depression or contemplating suicide, though one<sup>(107)</sup> noted  
38  
39 266 that the effect did not carry over to adolescents. Two reviews<sup>(108, 109)</sup> concluded that more  
40  
41 267 research is needed on combined therapies to determine the potential synergistic benefits of a  
42  
43 268 multi-faceted approach.  
44  
45  
46

## 47 269 **Q7. Can diet or exercise affect the development of depression?**

48  
49

50 270 **Diet:** We identified evidence for the role of diet in the treatment or prevention of depression  
51  
52 271 from two narrative reviews<sup>(110, 111)</sup> and 13 observational studies<sup>(112-124)</sup>. One review<sup>(110, 111)</sup> found  
53  
54  
55



1  
2  
3 272 that the importance of good nutrition for mental health is supported in the literature, especially  
4  
5 273 for older populations, and the second<sup>(110)</sup> found that Western diets might be associated with a  
6  
7  
8 274 higher risk of depression. Of the observational studies, two studies<sup>(113, 116)</sup> reported that dietary  
9  
10 275 patterns were not associated with depression risk or development, but one<sup>(116)</sup> noted that overall  
11  
12 276 caloric intake was inversely related to depression in older people. Three studies<sup>(121-123)</sup> found that  
13  
14 277 moderate adherence to a certain diet type was associated with lower rates of depression. The  
15  
16 278 remaining studies investigated specific nutrients. Five studies<sup>(114, 118-120, 124)</sup> examined fish or the  
17  
18 279 consumption of specific fatty acids. One<sup>(120)</sup> reported no association between fat intake and  
19  
20 280 depression; another<sup>(119)</sup> found no relationship between omega-3 polyunsaturated fatty acids  
21  
22 281 (PUFA) and depression, but reported an inverse relationship between  $\alpha$ -linoleic acid and  
23  
24 282 depressive symptoms. Two studies<sup>(114, 118)</sup> reported an inverse relationship between depression  
25  
26 283 risk and fish consumption. One study<sup>(123)</sup> found that higher trans fatty acid consumption was  
27  
28 284 associated with a higher risk of depression, as well as an inverse association between  
29  
30 285 monounsaturated fatty acids (MUFA), PUFA, or olive oil consumption and depression. Of the  
31  
32 286 remaining studies, one<sup>(117)</sup> found no association between zinc intake and depression risk, one<sup>(115)</sup>  
33  
34 287 found a moderate positive relationship between dietary fibre intake and depression rates, and  
35  
36 288 one<sup>(112)</sup> reported that higher flavonoid intake may decrease the risk of developing depression.  
37  
38  
39  
40  
41  
42

43 289 **Exercise and depression:** Twenty-five SRs<sup>(125-151)</sup> provided evidence regarding the role of  
44  
45 290 exercise in the treatment or prevention of depression. Two SRs focusing on adolescents with  
46  
47 291 depression<sup>(125, 142)</sup> found exercise to be effective in reducing depression symptoms. Three SRs  
48  
49 292 found exercise effective for depressive symptoms in elderly patients, with one concluding that  
50  
51 293 exercise had a large antidepressant effect<sup>(149)</sup>, one finding no difference between exercise and  
52  
53 294 antidepressant drugs<sup>(147)</sup>, and the third finding exercise in conjunction with antidepressants to be  
54  
55

1  
2  
3 295 effective in elderly patients with treatment resistant depression<sup>(137)</sup>. Two reviews looked at  
4  
5 296 exercise for depression in special populations, with one finding reduced symptoms in pregnant  
6  
7 297 women<sup>(151)</sup>, and the other finding the same result in patients with chronic disease<sup>(132)</sup>. Three  
8  
9  
10 298 reviews found exercise to be effective as an adjunct to other therapy, including pharmacological  
11  
12 299 or psychosocial<sup>(127, 138, 144)</sup>. Two reviews<sup>(133, 136)</sup> did not find sufficient evidence to suggest a  
13  
14 300 benefit of exercise. The remaining reviews found exercise a favourable intervention in terms of  
15  
16 301 symptom reduction or relapse prevention, with exercise providing additional benefit over no  
17  
18 302 treatment, or demonstrating no difference from pharmacological or psychological treatments<sup>(126,</sup>  
19  
20  
21 303 128, 130, 135, 139-141, 143, 148).

22  
23  
24 304 **Diet, exercise and depression:** Two RCTs<sup>(129, 150)</sup> examined interventions with both dietary and  
25  
26 305 exercise components. The first<sup>(129)</sup> was a pilot of the later study<sup>(150)</sup>. While the pilot study found  
27  
28 306 that specific lifestyle recommendations were an effective complement to antidepressant  
29  
30 307 therapy<sup>(129)</sup>, the larger study did not find the same association<sup>(150)</sup>.

31  
32  
33  
34 308 **Q8. What are the functional, social, intellectual, physical and psychological problems**  
35  
36 309 **experienced by children and teens living with an immediate family member who has**  
37  
38 310 **depression?**

39  
40  
41  
42 311 Two SRs<sup>(152, 153)</sup> and a meta-analysis<sup>(154)</sup> found children had significantly higher intelligence  
43  
44 312 quotient scores if their mothers were not diagnosed with post-natal depression. For children with  
45  
46 313 a depressed family member, one SR<sup>(153)</sup> reported either weak or no evidence for all outcomes  
47  
48 314 while another SR<sup>(152)</sup> reported that maternal depression was more strongly associated with  
49  
50 315 internalizing problems than with negative or positive emotion/behaviour, and with children's

316 general psychopathology than with externalizing problems and negative or positive

317 emotion/behaviour.

318 Four SRs reported on a variety of outcomes. One<sup>(155)</sup> suggested that chronic maternal depression

319 may play an important role in a child being overweight while another<sup>(156)</sup> reported that when

320 maternal depression exists, early childhood aggression is more likely to occur. Parental pre- and

321 postnatal depression was found to be responsible for increasing the mean rate of behavioural and

322 emotional problems<sup>(157)</sup> and antenatal depression was found to affect children's conduct

323 problems and antisocial behaviours<sup>(158)</sup>.

324 **Q9. What interventions are effective in preventing and treating workplace depression and**

325 **reducing stigma associated with depression in the workplace?**

326 Five SRs<sup>(159-163)</sup> measuring depression directly reported that workplace interventions showed

327 positive effects on depression severity, with one meta-analysis<sup>(163)</sup> indicating a small effect size.

328 No single intervention was identified as being the most effective for improving symptoms of

329 depression; however, CBT had the most evidence supporting its effectiveness.<sup>(159, 160)</sup>

330 Workplace absenteeism was used as a proxy depression measure in two reviews<sup>(164, 165)</sup>. One

331 review<sup>(164)</sup> of workers with major depressive disorder or high levels of depressive symptoms

332 reported that combining a work-directed intervention with a clinical intervention decreased

333 sickness absences. In contrast, an earlier review<sup>(165)</sup> found insufficient evidence to determine

334 effectiveness of workplace interventions on absenteeism in depressed employees due to high risk

335 of bias and very low quality evidence. We did not find any reviews addressing stigma.

1  
2  
3 336 **Q10. Are there structural or functional changes in brains due to antidepressant therapy**  
4  
5 337 **during brain development (in children)?**  
6  
7

8 338 One narrative review<sup>(166)</sup> reported that research of the effects of antidepressant medication on  
9  
10 339 adolescent brain development was limited to animal models and treatment decisions were often  
11  
12  
13 340 based on adult-specific studies. A prospective cohort study (n=15)<sup>(167)</sup> supported the use of  
14  
15 341 fluoxetine to achieve normal brain activity in adolescents with depression.  
16  
17

18 342 **Q11. What is the role of the family in the treatment and trajectory of depression?**  
19  
20

21 343 Four reviews<sup>(76, 168-170)</sup> addressed populations where the main diagnosis was depression.  
22  
23 344 Three<sup>(168-170)</sup> of these reviews reported that interventions including one or more family members  
24  
25 345 led to improved depressive symptoms in the patient. The remaining review<sup>(76)</sup> found that while  
26  
27 346 family therapy appears to be more effective than no treatment, the certainty of its effectiveness is  
28  
29  
30 347 unclear. Two<sup>(171, 172)</sup> additional reviews addressed changes in depressive symptoms through  
31  
32 348 family involvement where depression was an outcome of the primary disease diagnosis. For  
33  
34 349 cancer patients, couple-based interventions, particularly psychoeducation interventions, led to  
35  
36 350 significant improvements in patients' depression scores<sup>(172)</sup>, while family-orientated intervention  
37  
38 351 was effective at reducing depression in patients post-stroke<sup>(171)</sup>. Three reviews<sup>(168, 171, 172)</sup> also  
39  
40 352 reported the interventions benefited patients' families, with an improved quality of life for  
41  
42 353 caregivers including reduced depressive symptoms.  
43  
44  
45  
46

47 354 **DISCUSSION**  
48  
49

50 355 An extensive volume of research relating to depression addresses, either in whole or in part, the  
51  
52 356 11 research questions that arose from the ADPSP. The extent of available research underscores  
53  
54  
55  
56

1  
2  
3 357 the importance of this mental health disorder and its far-reaching impact. This mapping of the  
4  
5 358 evidence provides a strong and critical foundation to guide future research and knowledge  
6  
7  
8 359 translation opportunities.  
9

10  
11 360 Among the patient-identified priorities, there are questions where extensive evidence exists (i.e.,  
12  
13 361 hundreds of primary studies), yet uncertainties remain. It might be tempting to conclude that  
14  
15 362 ‘more research is needed’; however, a close examination of what is known and what remains  
16  
17 363 uncertain is critical to guide implementation of proven strategies and judicious investment in  
18  
19 364 future research efforts. For example, there is evidence supporting the effectiveness of many non-  
20  
21 365 pharmacological interventions (including psychological interventions and exercise) to reduce  
22  
23  
24 366 depressive symptoms. However, targeted research is needed that addresses comparative  
25  
26  
27 367 effectiveness of promising interventions, specific populations of interest (e.g., children, minority  
28  
29 368 groups), and adverse effects. Further, attention is needed to ensure appropriate and rigorous  
30  
31 369 methods, and explore innovative methodologies (e.g., real world evidence, pragmatic trials, big  
32  
33  
34 370 data analytics, network meta-analysis) to make the most efficient use of funds, existing research,  
35  
36 371 and available data.  
37

38  
39 372 A lack of knowledge translation was also recognized in the PPSP process. For some priorities,  
40  
41 373 there is research available to answer patient-identified research priorities yet they are still being  
42  
43 374 identified as knowledge gaps. For example, cognitive behavioral therapy has evidence  
44  
45 375 supporting its effectiveness in preventing and treating workplace depression. Investment in  
46  
47  
48 376 knowledge translation strategies to increase awareness and subsequent implementation of these  
49  
50 377 interventions is critical, and should be a priority for funding agencies and other stakeholders.  
51

## 52 53 378 **Strengths**

1  
2  
3 379 From a service provision standpoint application of rapid response methods enabled our team to  
4  
5 380 provide the requestor with targeted evidence relating to their priorities. From a methods  
6  
7 381 perspective, our approach allowed for the expedited provision of results within a tight timeframe  
8  
9 382 while using transparent and reproducible methods. Lastly, the collaboration between our  
10  
11 383 knowledge synthesis team and the PSPP furthers the likelihood that future depression research  
12  
13 384 agendas represent the interests of both researchers and patients.  
14  
15

### 16 17 385 **Challenges**

18  
19  
20 386 We attempted to categorize the results of each rapid response as to whether further primary  
21  
22 387 research, evidence syntheses or knowledge translation was needed based on the JLA definition of  
23  
24 388 a treatment uncertainty. Verification of treatment uncertainties through JLA is based on the  
25  
26 389 reported confidence interval of a recent systematic review or confirmation that a statistically  
27  
28 390 significant result is also clinically important<sup>(15)</sup>. The priorities identified by the ADPSP were not  
29  
30 391 all focused on treatment efficacy however, and we were unable to find guidance for other  
31  
32 392 research questions. The complexity of the questions also made it difficult to apply definitions of  
33  
34 393 uncertainty. The identified SRs also had multiple effect estimates within and across different  
35  
36 394 outcomes, comparisons, and populations. For example, 25 SRs relating to the exercise  
37  
38 395 component of question seven (diet, exercise and depression development) identified four specific  
39  
40 396 populations (teenagers, older adults, pregnant women, persons with chronic disease) and for  
41  
42 397 question three part a (cost advantages for non-pharmacological treatment options) there were 22  
43  
44 398 different cost comparisons across 18 studies examining 16 different therapies. In order to answer  
45  
46 399 whether treatment uncertainties exist, the question needed to be very specific with details on  
47  
48 400 population, intervention, comparison, and outcome. In addition, many of the questions had  
49  
50  
51  
52  
53  
54

1  
2  
3 401 multiple components; therefore, at times there was evidence for some but not all components.  
4  
5 402 For question seven, there was high quality evidence supporting exercise for preventing further  
6  
7 403 development of depression symptoms; however, there was very little evidence regarding diet.  
8  
9  
10 404 The extensive volume of evidence also posed challenges. For example, question three, part c  
11  
12 405 (effectiveness of non-pharmacological interventions) identified 179 SRs; given our short timeline  
13  
14 406 it was necessary to include only the 27 SRs which mostly directly answered the research  
15  
16 407 question. An a-priori process for ranking or further categorizing large volumes of evidence is  
17  
18 408 recommended.

### 409 **Lessons learned**

25 410 The role of knowledge synthesis in PPSPs is currently not well defined. Detailed guidelines that  
26  
27 411 outline how to balance efficiency and methodological rigour while determining the existing  
28  
29 412 evidence base for a PPSP are needed. We recommend that knowledge synthesis experts be  
30  
31 413 involved early in the PPSP process. Input into the survey may allow for more details of the  
32  
33 414 populations, interventions, comparisons, and outcomes of interest by both the public and the  
34  
35 415 steering committee leading to more specific and answerable research questions. Development of  
36  
37 416 very focused questions will decrease the time needed for literature screening and aid in defining  
38  
39 417 criteria to determine certainty of evidence or knowledge translation needs a priori. Focused  
40  
41 418 questions are also more likely to be incorporated into a research agenda, a core PPSP goal.

### 419 **Limitations**

420 With limited rapid review methods guidance available in 2017, we adapted methods used by the  
421 Canadian Agency for Drugs and Technologies in Health (CADTH)<sup>(16)</sup> and scoping review  
422 methodology.<sup>(19)</sup> While the need for evidence in a short time frame directed our methods, our



1  
2  
3 423 results should be interpreted in light of some limitations such as searching one database  
4  
5 424 (PubMed), not including grey literature, and using a single experienced screener. According to  
6  
7 425 scoping review methodology<sup>(19)</sup>, we did not conduct formal quality assessment, rather we  
8  
9 426 reported author-identified limitations of the included studies. Due to the large body of evidence  
10  
11 427 we filtered the citations using recognized approaches to hierarchies of evidence. We did not  
12  
13 428 involve patients in reframing the questions or in identification and synthesis of relevant  
14  
15 429 literature; this is consistent with existing guidance for PSPs.<sup>(15)</sup> However, further work on  
16  
17 430 whether and how to involve patients in this aspect of a PSP would be beneficial to ensure their  
18  
19 431 perspectives are integrated throughout the process. Finally, the results of this PSPP may not be  
20  
21 432 generalizable to other jurisdictions. For example, a PSPP was undertaken in the United Kingdom  
22  
23 433 in 2014/2015 on the same topic of depression and a comparison with the resulting ten priorities  
24  
25 434 revealed only two similar questions relating to the most successful treatment for depression and  
26  
27 435 the impact on children of having a parent with depression. There were three different questions  
28  
29 436 that addressed similar concepts: access to services, workplace stigma and the role of friends and  
30  
31 437 family.<sup>(173)</sup>

## 32 33 438 **CONCLUSIONS**

34  
35  
36  
37  
38  
39 439 Through 11 rapid responses, we identified an extensive body of evidence addressing patient  
40  
41 440 identified priorities in depression research, and identified the strengths and limitations of existing  
42  
43 441 evidence, areas of uncertainty, and general directions for future research. This work can serve as  
44  
45 442 a strong foundation to guide future research and knowledge translation activities. Integrated  
46  
47 443 knowledge syntheses bring value to the PPSP process and help avoid duplication of research  
48  
49 444 effort. The role of knowledge synthesis in PPSPs is not well defined at present, in particular how  
50  
51  
52  
53  
54  
55  
56

1  
2  
3 445 to involve patients in this process. Categorizing available evidence without focused questions or  
4  
5 446 a priori criteria is challenging and may not support all PPSPs particularly where the scope of  
6  
7  
8 447 priorities is broad.  
9

10 448

11 449 **FIGURE LEGENDS**12 450 **FIGURE 1. Alberta's Top 11 Patient-Identified Depression Research Priorities<sup>14</sup>**

13 451

14 452 **FIGURE 2. Flow diagram of screening decisions**

15 453

16  
17  
18 454 **ACKNOWLEDGEMENTS:** We would like to thank Samantha Guitard for assistance with  
19 455 formatting.  
2021  
22 456 **FUNDING STATEMENT:** This work was supported by the Alberta Strategy for Patient-  
23 457 Oriented Research SUPPORT Unit Knowledge Translation Program, which is funded by Alberta  
24 458 Innovates and the Canadian Institutes of Health Research, and the Alberta Research Centre for  
25 459 Health Evidence.  
2627 460 **COMPETING INTERESTS:** None  
2829 461 **AUTHOR'S CONTRIBUTION:** MS authored three of the rapid responses and was the main  
30 462 contributor to the manuscript. MG authored three of the rapid responses and had input into the  
31 463 manuscript. AG, MN and LMB each authored two of the rapid responses and had input into the  
32 464 manuscript. RF developed and ran all the search strategies for the rapid responses and  
33 465 contributed the searching sections of the manuscript. LB and PML led the ADPSP and PML  
34 466 collaborated in adaptation of the identified priorities into research questions. LH initiated this  
35 467 collaborative manuscript and contributed to the writing. All authors read, revised and approved  
36 468 the final version of the paper.  
37  
3839  
40 469 **DATA AVAILABILITY:** All relevant data for this study are included in the article or available  
41 470 as supplementary information.  
42

43 471

44  
45 472  
46  
47  
48  
49  
50  
51  
52  
53  
54  
55  
56

## 473 REFERENCES

- 474 1. World Health Organization. Depression and other common mental disorders: global health  
475 estimates. Geneva: World Health Organization 2017;1-24.
- 476 2. Kessler RC, Bromet EJ. The epidemiology of depression across cultures. *Annu Rev Public*  
477 *Health* 2013;34:119-38.
- 478 3. Evans-Lacko S, Knapp M. Global patterns of workplace productivity for people with  
479 depression: absenteeism and presenteeism costs across eight diverse countries.  
480 *Soc Psychiatry Psychiatr Epidemiol* 2016;51(11):1525-37.
- 481 4. Bouwmans CAM, Vemer P, van Straten A, Tan SS, Hakkaart-van Roijen L. Health-related  
482 quality of life and productivity losses in patients with depression and anxiety disorders. *J*  
483 *Occup Environ Med* 2014;56(4):420-4.
- 484 5. Sivertsen H, Bjorklof GH, Engedal K, Selbaek G, Helvik AS. Depression and quality of life in  
485 older persons: a review. *Dement Geriatr Cogn Disord* 2015;40(5-6):311-39.
- 486 6. Lepine JP, Gastpar M, Mendlewicz J, Tylee A. Depression in the community: the first pan-  
487 European study DEPRES (Depression Research in European Society). *Int Clin*  
488 *Psychopharmacol* 1997;12(1):19-29.
- 489 7. Crowe S, Fenton M, Hall M, Cowan K, Chalmers I. Patients', clinicians' and the research  
490 communities' priorities for treatment research: there is an important mismatch. *Res Involv*  
491 *Engagem* 2015;1:2.
- 492 8. Canadian Institutes of Health Research. [Internet] Strategy for patient-oriented research.  
493 Government of Canada. [cited: April 26, 2018]. Available from: [http://www.cihr-](http://www.cihr-irsc.gc.ca/e/41204.html)  
494 [irsc.gc.ca/e/41204.html](http://www.cihr-irsc.gc.ca/e/41204.html)
- 495 9. Patient-Centered Outcomes Research Institute. [Internet]. [cited: April 26, 2018]. Available  
496 from: [www.pcori.org](http://www.pcori.org)
- 497 10. James Lind Alliance. [Internet]. National Health Service. [cited: April 26, 2018]. Available  
498 from: [www.jla.nihr.ac.uk](http://www.jla.nihr.ac.uk)
- 499 11. Tallon D, Chard J, Dieppe P. Relation between agendas of the research community and the  
500 research consumer. *Lancet* 2000;355(9220):2037-40.
- 501 12. Alberta Innovates. [Internet] Alberta's top 11 priorities for depression research. Alberta  
502 Depression Research Priority Setting Project. [cited: April 26, 2018]. Available  
503 from: [https://albertainnovates.ca/our-health-innovation-focus/the-alberta-spor-support-](https://albertainnovates.ca/our-health-innovation-focus/the-alberta-spor-support-unit/patient-engagement-platform/alberta-depression-research-priority-setting-project/)  
504 [unit/patient-engagement-platform/alberta-depression-research-priority-setting-project/](https://albertainnovates.ca/our-health-innovation-focus/the-alberta-spor-support-unit/patient-engagement-platform/alberta-depression-research-priority-setting-project/)
- 505 13. Breault L, Rittenbach K, Hartle K, et al. People with lived experience (PWLE) of depression:  
506 describing and reflecting on an explicit patient engagement process within depression  
507 research priority setting in Alberta, Canada. *Res Involv Engagem* 2018;16:5.
- 508 14. Breault L, Rittenbach K, Hartle K, et al. A survey of priority setting for depression: eleven  
509 research questions asked by people with lived depression experience in Alberta. *CMAJ Open*  
510 2018;6(3):E398-E405.
- 511 15. Cowan K, Oliver S. [Internet]. James Lind Alliance guidebook. Southampton, UK: The  
512 James Lind Alliance; 2016. Available from: [www.jla.nihr.ac.uk/jla-guidebook/](http://www.jla.nihr.ac.uk/jla-guidebook/)
- 513 16. Canadian Agency for Drugs and Technologies in Health. [Internet]. Rapid response summary  
514 with critical appraisal: process 2015; 1. [cited: April 26, 2018]. Available  
515 from: [https://www.cadth.ca/sites/default/files/external\\_rr\\_l2\\_l2\\_5\\_process.pdf](https://www.cadth.ca/sites/default/files/external_rr_l2_l2_5_process.pdf)

- 1  
2  
3 516 17. Harker J, Kleijnen J. What is a rapid review? A methodological exploration of rapid reviews  
4 517 in Health Technology Assessments. *Int J Evid Based Healthc* 2012;10(4):397-410.  
5 518 18. National Library of Medicine. [Internet]. MEDLINE: Description of the database. [cited  
6 519 March 5, 2019]. Available from: [www.nlm.nih.gov/bsd/medline.html](http://www.nlm.nih.gov/bsd/medline.html).  
7  
8 520 19. The Joanna Briggs Institute. The Joanna Briggs Institute reviewers' manual: 2015 edition /  
9 521 supplement. Australia: The Joanna Briggs Institute. 2015. Available from:  
10 522 [www.joannabriggs.org](http://www.joannabriggs.org).  
11 523 20. Farah WH, Alsawas M, Mainou M, Alahdab F, Farah MH, Ahmed AT, et al. Non-  
12 524 pharmacological treatment of depression: a systematic review and evidence map. *Evid Based*  
13 525 *Med* 2016;21(6):214-21.  
14 526 21. Gartlehner G, Gaynes BN, Amick HR, et al. AHRQ comparative effectiveness reviews.  
15 527 Nonpharmacological versus pharmacological treatments for adult patients with major  
16 528 depressive disorder. Rockville (MD): Agency for Healthcare Research and Quality (US)  
17 529 2015.  
18 530 22. Weitz ES, Hollon SD, Twisk J, et al. Baseline depression severity as moderator of depression  
19 531 outcomes between cognitive behavioral therapy vs pharmacotherapy: an individual patient  
20 532 data meta-analysis. *JAMA Psychiatry* 2015;72(11):1102-9.  
21 533 23. Trivedi RB, Nieuwsma JA, Williams JW, Jr., Baker D. VA Evidence-based synthesis  
22 534 program reports. Evidence synthesis for determining the efficacy of psychotherapy for  
23 535 treatment resistant depression. Washington (DC): Department of Veterans Affairs (US) 2009.  
24 536 24. Cox GR, Callahan P, Churchill R, et al. Psychological therapies versus antidepressant  
25 537 medication, alone and in combination for depression in children and adolescents. *Cochrane*  
26 538 *Database Syst Rev* 2014;(11):Cd008324.  
27 539 25. Biesheuvel-Leliefeld KE, Kok GD, Bockting CL, et al. Effectiveness of psychological  
28 540 interventions in preventing recurrence of depressive disorder: meta-analysis and meta-  
29 541 regression. *J Affect Disord* 2015;174:400-10.  
30 542 26. Guidi J, Fava GA, Fava M, Papakostas GI. Efficacy of the sequential integration of  
31 543 psychotherapy and pharmacotherapy in major depressive disorder: a preliminary meta-  
32 544 analysis. *Psychol Med* 2011;41(2):321-31.  
33 545 27. Chiesa A, Serretti A. Mindfulness based cognitive therapy for psychiatric disorders: a  
34 546 systematic review and meta analysis. *Psychiatry Res* 2011;187(3):441-53.  
35 547 28. Piet J, Hougaard E. The effect of mindfulness-based cognitive therapy for prevention of  
36 548 relapse in recurrent major depressive disorder: a systematic review and meta-analysis. *Clin*  
37 549 *Psychol Rev* 2011;31(6):1032-40.  
38 550 29. Cox GR, Fisher CA, De Silva S, et al. Interventions for preventing relapse and recurrence of  
39 551 a depressive disorder in children and adolescents. *Cochrane Database Syst Rev*  
40 552 2012;11:Cd007504.  
41 553 30. Wu Q, Qu W, Crowell MD, Hentz JG, Frey KA. Tricyclic antidepressant use and risk of  
42 554 fractures: a meta-analysis of cohort and case-control studies. *J Bone Miner Res*  
43 555 2013;28(4):753-63.  
44 556 31. Wu Q, Liu J, Gallegos-Orozco JF, Hentz JG. Depression, fracture risk, and bone loss: a  
45 557 meta-analysis of cohort studies. *Osteoporos Int* 2010;21(10):1627-35.  
46 558 32. Wu Q, Bencaz AF, Hentz JG, Crowell MD. Selective serotonin reuptake inhibitor treatment  
47 559 and risk of fractures: a meta-analysis of cohort and case-control studies. *Osteoporos Int*  
48 560 2012;23(1):365-75.

- 1  
2  
3 561 33. Gebara MA, Shea ML, Lipsey KL, et al. Depression, antidepressants, and bone health in  
4 562 older adults: a systematic review. *J Am Geriatr Soc* 2014;62(8):1434-41.
- 5 563 34. Eom CS, Lee HK, Ye S, Park SM, Cho KH. Use of selective serotonin reuptake inhibitors  
6 564 and risk of fracture: a systematic review and meta-analysis. *J Bone Miner Res*  
7 565 2012;27(5):1186-95.
- 8 566 35. Rotella F, Mannucci E. Depression as a risk factor for diabetes: a meta-analysis of  
9 567 longitudinal studies. *J Clin Psychiatry* 2013;74(1):31-7.
- 10 568 36. Correll CU, Detraux J, De Lepeleire J, De Hert M. Effects of antipsychotics, antidepressants  
11 569 and mood stabilizers on risk for physical diseases in people with schizophrenia, depression  
12 570 and bipolar disorder. *World Psychiatry* 2015;14(2):119-36.
- 13 571 37. Perez-Pinar M, Mathur R, Foguet Q, Ayis S, Robson J, Ayerbe L. Cardiovascular risk factors  
14 572 among patients with schizophrenia, bipolar, depressive, anxiety, and personality disorders.  
15 573 *Eur Psychiatry* 2016;35:8-15.
- 16 574 38. Rubin RR, Peyrot M, Gaussoin SA, et al. Four-year analysis of cardiovascular disease risk  
17 575 factors, depression symptoms, and antidepressant medicine use in the Look AHEAD (Action  
18 576 for Health in Diabetes) clinical trial of weight loss in diabetes. *Diabetes Care*  
19 577 2013;36(5):1088-94.
- 20 578 39. Pocha C, Knott A, Rector TS, Dieperink E. Are selective serotonin reuptake inhibitors  
21 579 associated with hepatocellular carcinoma in patients with hepatitis C? *J Clinical Psychiatry*  
22 580 2014;75(10):e1122-6.
- 23 581 40. Egede LE, Gebregziabher M, Walker RJ, Payne EH, Acierno R, Frueh BC. Trajectory of cost  
24 582 overtime after psychotherapy for depression in older veterans via telemedicine. *J Affect*  
25 583 *Disord* 2017;207:157-62.
- 26 584 41. Richards DA, Ekers D, McMillan D, et al. Cost and outcome of behavioural activation versus  
27 585 cognitive behavioural therapy for depression (COBRA): a randomised, controlled, non-  
28 586 inferiority trial. *Lancet* 2016;388(10047):871-80.
- 29 587 42. Andersen P, Toner P, Bland M, McMillan D. Effectiveness of transdiagnostic cognitive  
30 588 behaviour therapy for anxiety and depression in adults: a systematic review and meta-  
31 589 analysis. *Behav Cogn Psychother* 2016;44(6):673-90.
- 32 590 43. Bower P, Knowles S, Coventry PA, Rowland N. Counselling for mental health and  
33 591 psychosocial problems in primary care. *Cochrane Database Syst Rev* 2011(9):Cd001025.
- 34 592 44. Brown JS, Sellwood K, Beecham JK, et al. Outcome, costs and patient engagement for group  
35 593 and individual CBT for depression: a naturalistic clinical study. *Behav Cogn Psychother*  
36 594 2011;39(3):355-8.
- 37 595 45. Goodyer IM, Reynolds S, Barrett B, et al. Cognitive-behavioural therapy and short-term  
38 596 psychoanalytic psychotherapy versus brief psychosocial intervention in adolescents with  
39 597 unipolar major depression (IMPACT): a multicentre, pragmatic, observer-blind, randomised  
40 598 controlled trial. *Health Technol Assess (England)* 2017;21(12):1-94.
- 41 599 46. Hammond GC, Croudace TJ, Radhakrishnan M, Lafortune L, Watson A, McMillan-Shields  
42 600 F, et al. Comparative effectiveness of cognitive therapies delivered face-to-face or over the  
43 601 telephone: an observational study using propensity methods. *PLoS ONE* 2012;7(9):e42916.
- 44 602 47. Kafali N, Cook B, Canino G, Alegria M. Cost-effectiveness of a randomized trial to treat  
45 603 depression among Latinos. *J Ment Health Policy Econ* 2014;17(2):41-50.
- 46 604 48. Karyotaki E, Tordrup D, Buntrock C, Bertollini R, Cuijpers P. Economic evidence for the  
47 605 clinical management of major depressive disorder: a systematic review and quality appraisal



- of economic evaluations alongside randomised controlled trials. *Epidemiol Psychiatr Sci* 2016;1-16.
49. Meuldijk D, Carlier IV, van Vliet IM, van Hemert AM, Zitman FG, van den Akker-van Marle ME. Economic evaluation of concise cognitive behavioural therapy and/or pharmacotherapy for depressive and anxiety disorders. *J Ment Health Policy Econ* 2015;18(4):175-83.
50. Morrell CJ, Warner R, Slade P, et al. Psychological interventions for postnatal depression: cluster randomised trial and economic evaluation. The PoNDER trial. *Health Technol Assess (England)* 2009;13(30):iii-iv,xi-xiii,1-153.
51. Boudreau R, Moulton K, Cunningham J. Self-directed cognitive behavioural therapy for adults with diagnosis of depression: systematic review of clinical effectiveness, cost-effectiveness, and guidelines. *CADTH Technol Overv* 2010;1(4):e0125.
52. Romero-Sanchiz P, Nogueira-Arjona R, Garcia-Ruiz A, et al. Economic evaluation of a guided and unguided internet-based CBT intervention for major depression: results from a multi-center, three-armed randomized controlled trial conducted in primary care. *PLoS ONE* 2017;12(2):e0172741.
53. Solomon D, Proudfoot J, Clarke J, Christensen H. e-CBT (myCompass), antidepressant medication, and face-to-face psychological treatment for depression in Australia: a cost-effectiveness comparison. *J Med Internet Res* 2015;17(11):e255.
54. Warmerdam L, Smit F, van Straten A, Riper H, Cuijpers P. Cost-utility and cost-effectiveness of internet-based treatment for adults with depressive symptoms: randomized trial. *J Med Internet Res* 2010;12(5):e53.
55. Berghout CC, Zevalkink J, Hakkaart-van Roijen L. A cost-utility analysis of psychoanalysis versus psychoanalytic psychotherapy. *Int J Technol Assess Health Care* 2010;26(1):3-10.
56. Dunn NJ, Rehm LP, Schillaci J, et al. A randomized trial of self-management and psychoeducational group therapies for comorbid chronic posttraumatic stress disorder and depressive disorder. *J Trauma Stress* 2007;20(3):221-37.
57. Maljanen T, Knekt P, Lindfors O, Virtala E, Tillman P, Harkanen T. The cost-effectiveness of short-term and long-term psychotherapy in the treatment of depressive and anxiety disorders during a 5-year follow-up. *J Affect Disord* 2016;190:254-63.
58. Gertler P, Tate RL, Cameron ID. Non-pharmacological interventions for depression in adults and children with traumatic brain injury. *Cochrane Database Syst Rev* 2015(12):Cd009871.
59. Shinohara K, Honyashiki M, Imai H, et al. Behavioural therapies versus other psychological therapies for depression. *Cochrane Database Syst Rev* 2013(10):Cd008696.
60. Egede LE, Acierno R, Knapp RG, et al. Psychotherapy for depression in older veterans via telemedicine: a randomised, open-label, non-inferiority trial. *Lancet Psychiatry* 2015;2(8):693-701.
61. Merry SN, Stasiak K, Shepherd M, Frampton C, Fleming T, Lucassen MF. The effectiveness of SPARX, a computerised self help intervention for adolescents seeking help for depression: randomised controlled non-inferiority trial. *BMJ* 2012;344:e2598.
62. Berking M, Ebert D, Cuijpers P, Hofmann SG. Emotion regulation skills training enhances the efficacy of inpatient cognitive behavioral therapy for major depressive disorder: a randomized controlled trial. *Psychother Psychosom* 2013;82(4):234-45.
63. Goodyer IM, Reynolds S, Barrett B, et al. Cognitive behavioural therapy and short-term psychoanalytical psychotherapy versus a brief psychosocial intervention in adolescents with

- 1  
2  
3 651 unipolar major depressive disorder (IMPACT): a multicentre, pragmatic, observer-blind,  
4 652 randomised controlled superiority trial. *Lancet Psychiatry* 2017;4(2):109-19.
- 5 653 64. Himelhoch S, Medoff D, Maxfield J, et al. Telephone based cognitive behavioral therapy  
6 654 targeting major depression among urban dwelling, low income people living with  
7 655 HIV/AIDS: results of a randomized controlled trial. *AIDS Behav* 2013;17(8):2756-64.
- 8 656 65. Andersson G, Cuijpers P, Carlbring P, Riper H, Hedman E. Guided internet-based vs. face-  
9 657 to-face cognitive behavior therapy for psychiatric and somatic disorders: a systematic review  
10 658 and meta-analysis. *World Psychiatry* 2014;13(3):288-95.
- 11 659 66. Barth J, Munder T, Gerger H, et al. Comparative efficacy of seven psychotherapeutic  
12 660 interventions for patients with depression: a network meta-analysis. *PLoS Med*  
13 661 2013;10(5):e1001454.
- 14 662 67. Braun SR, Gregor B, Tran US. Comparing bona fide psychotherapies of depression in adults  
15 663 with two meta-analytical approaches. *PloS ONE* 2013;8(6):e68135.
- 16 664 68. Burlingame GM, Seebeck JD, Janis RA, et al. Outcome differences between individual and  
17 665 group formats when identical and nonidentical treatments, patients, and doses are compared:  
18 666 a 25-year meta-analytic perspective. *Psychotherapy (Chic)* 2016;53(4):446-61.
- 19 667 69. Cape J, Whittington C, Buszewicz M, Wallace P, Underwood L. Brief psychological  
20 668 therapies for anxiety and depression in primary care: meta-analysis and meta-regression.  
21 669 *BMC Med* 2010;8:38.
- 22 670 70. Cuijpers P, Andersson G, Donker T, van Straten A. Psychological treatment of depression:  
23 671 results of a series of meta-analyses. *Nord J Psychiatry* 2011;65(6):354-64.
- 24 672 71. Cuijpers P, Donker T, van Straten A, Li J, Andersson G. Is guided self-help as effective as  
25 673 face-to-face psychotherapy for depression and anxiety disorders? A systematic review and  
26 674 meta-analysis of comparative outcome studies. *Psychol Med* 2010;40(12):1943-57.
- 27 675 72. Cuijpers P, van Straten A, Andersson G, van Oppen P. Psychotherapy for depression in  
28 676 adults: a meta-analysis of comparative outcome studies. *J Consult Clin Psychol*  
29 677 2008;76(6):909-22.
- 30 678 73. Dedert E, McDuffie JR, Swinkels C, et al. VA evidence-based synthesis program reports.  
31 679 Computerized cognitive behavioral therapy for adults with depressive or anxiety disorders.  
32 680 Washington (DC): Department of Veterans Affairs (US); 2013.
- 33 681 74. Dennis CL, Hodnett E. Psychosocial and psychological interventions for treating postpartum  
34 682 depression. *Cochrane Database Syst Rev* 2007(4):Cd006116.
- 35 683 75. Hazell P. Depression in children and adolescents. *BMJ Clin Evid* 2011;1008.
- 36 684 76. Henken HT, Huibers MJ, Churchill R, Restifo K, Roelofs J. Family therapy for depression.  
37 685 *Cochrane Database Syst Rev* 2007(3):Cd006728.
- 38 686 77. Hunot V, Moore TH, Caldwell DM, et al. 'Third wave' cognitive and behavioural therapies  
39 687 versus other psychological therapies for depression. *Cochrane Database Syst Rev*  
40 688 2013(10):Cd008704.
- 41 689 78. Jakobsen JC, Hansen JL, Simonsen S, Simonsen E, Gluud C. Effects of cognitive therapy  
42 690 versus interpersonal psychotherapy in patients with major depressive disorder: a systematic  
43 691 review of randomized clinical trials with meta-analyses and trial sequential analyses. *Psychol*  
44 692 *Med* 2012;42(7):1343-57.
- 45 693 79. Jorm AF, Morgan AJ, Hetrick SE. Relaxation for depression. *Cochrane Database Syst Rev*  
46 694 2008(4):Cd007142.



- 1  
2  
3 695 80. Kriston L, von Wolff A, Westphal A, Holzel LP, Harter M. Efficacy and acceptability of  
4 696 acute treatments for persistent depressive disorder: a network meta-analysis. *Depress Anxiety*  
5 697 2014;31(8):621-30.  
6  
7 698 81. Linde K, Rucker G, Sigterman K, et al. Comparative effectiveness of psychological  
8 699 treatments for depressive disorders in primary care: network meta-analysis. *BMC Fam Pract*  
9 700 2015;16:103.  
10 701 82. Montgomery EC, Kunik ME, Wilson N, Stanley MA, Weiss B. Can paraprofessionals deliver  
11 702 cognitive-behavioral therapy to treat anxiety and depressive symptoms? *Bull Menninger Clin*  
12 703 2010;74(1):45-62.  
13 704 83. Nieuwenhuijsen K, Bultmann U, Neumeyer-Gromen A, Verhoeven AC, Verbeek JH, van der  
14 705 Feltz-Cornelis CM. Interventions to improve occupational health in depressed people.  
15 706 *Cochrane Database Syst Rev* 2008(2):Cd006237.  
16 707 84. Samad Z, Brealey S, Gilbody S. The effectiveness of behavioural therapy for the treatment of  
17 708 depression in older adults: a meta-analysis. *Int J Geriatr Psychiatry* 2011;26(12):1211-20.  
18 709 85. Spielmans GI, Pasek LF, McFall JP. What are the active ingredients in cognitive and  
19 710 behavioral psychotherapy for anxious and depressed children? A meta-analytic review. *Clin*  
20 711 *Psychol Rev* 2007;27(5):642-54.  
21 712 86. Steinert C, Munder T, Rabung S, Hoyer J, Leichsenring F. Psychodynamic therapy: as  
22 713 efficacious as other empirically supported treatments? A meta-analysis testing equivalence of  
23 714 outcomes. *Am J Psychiatry* 2017;174(10):943-53.  
24 715 87. Tolin DF. Is cognitive-behavioral therapy more effective than other therapies? A meta-  
25 716 analytic review. *Clin Psychol Rev* 2010;30(6):710-20.  
26 717 88. Wilson KC, Mottram PG, Vassilas CA. Psychotherapeutic treatments for older depressed  
27 718 people. *Cochrane Database Syst Rev* 2008(1):Cd004853.  
28 719 89. Zhou X, Hetrick SE, Cuijpers P, et al. Comparative efficacy and acceptability of  
29 720 psychotherapies for depression in children and adolescents: A systematic review and network  
30 721 meta-analysis. *World Psychiatry* 2015;14(2):207-22.  
31 722 90. Bennett K, Rhodes AE, Duda S, et al. A youth suicide prevention plan for Canada: A  
32 723 systematic review of reviews. *Can J Psychiatry* 2015;60(6):245-57.  
33 724 91. Das JK, Salam RA, Lassi ZS, et al. Interventions for adolescent mental health: an overview  
34 725 of systematic reviews. *J Adolesc Health* 2016;59(4s):S49-S60.  
35 726 92. Devenish B, Berk L, Lewis AJ. The treatment of suicidality in adolescents by psychosocial  
36 727 interventions for depression: a systematic literature review. *Aust N Z Psychiatry*  
37 728 2016;50(8):726-40.  
38 729 93. Hawton K, Witt KG, Taylor Salisbury TL, et al. Interventions for self-harm in children and  
39 730 adolescents. *Cochrane Database Syst Rev* 2015(12):Cd012013.  
40 731 94. Katz C, Bolton SL, Katz LY, Isaak C, Tilston-Jones T, Sareen J. A systematic review of  
41 732 school-based suicide prevention programs. *Depress Anxiety* 2013;30(10):1030-45.  
42 733 95. Perry Y, Werner-Seidler A, Calear AL, Christensen H. Web-based and mobile suicide  
43 734 prevention interventions for young people: a systematic review. *J Can Acad Child Adolesc*  
44 735 *Psychiatry* 2016;25(2):73-9.  
45 736 96. Pu J, Zhou X, Liu L, et al. Efficacy and acceptability of interpersonal psychotherapy for  
46 737 depression in adolescents: a meta-analysis of randomized controlled trials. *Psychiatry Res*  
47 738 2017;253:226-32.

- 1  
2  
3 739 97. Townsend E, Walker DM, Sargeant S, et al. Systematic review and meta-analysis of  
4 740 interventions relevant for young offenders with mood disorders, anxiety disorders, or self-  
5 741 harm. *J Adolesc* 2010;33(1):9-20.
- 6 742 98. Cuijpers P, de Beurs DP, van Spijker BA, Berking M, Andersson G, Kerkhof AJ. The effects  
7 743 of psychotherapy for adult depression on suicidality and hopelessness: a systematic review  
8 744 and meta-analysis. *J Affect Disord* 2013;144(3):183-90.
- 9 745 99. Hawton K, Witt KG, Taylor Salisbury TL, et al. Psychosocial interventions following self-  
10 746 harm in adults: a systematic review and meta-analysis. *Lancet Psychiatry* 2016;3(8):740-50.
- 11 747 100. Hawton K, Witt KG, Taylor Salisbury TL, et al. Psychosocial interventions for self-harm in  
12 748 adults. *Cochrane Database Syst Rev* 2016(5):Cd012189.
- 13 749 101. Jakobsen JC, Hansen JL, Storebo OJ, Simonsen E, Gluud C. The effects of cognitive  
14 750 therapy versus 'no intervention' for major depressive disorder. *PloS ONE* 2011;6(12):e28299.
- 15 751 102. Lapiere S, Erlangsen A, Waern M, et al. A systematic review of elderly suicide prevention  
16 752 programs. *Crisis* 2011;32(2):88-98.
- 17 753 103. Okolie C, Dennis M, Simon Thomas E, John A. A systematic review of interventions to  
18 754 prevent suicidal behaviors and reduce suicidal ideation in older people. *Int Psychogeriatric*  
19 755 *2017;29(11):1801-24.*
- 20 756 104. Berrouiguet S, Baca-Garcia E, Brandt S, Walter M, Courtet P. Fundamentals for future  
21 757 mobile-health (mHealth): a systematic review of mobile phone and web-based text  
22 758 messaging in mental health. *J Med Internet Res* 2016;18(6):e135.
- 23 759 105. Fountoulakis KN, Gonda X, Siamouli M, Rihmer Z. Psychotherapeutic intervention and  
24 760 suicide risk reduction in bipolar disorder: a review of the evidence. *J Affect Disord*  
25 761 *2009;113(1-2):21-9.*
- 26 762 106. Meerwijk EL, Parekh A, Oquendo MA, Allen IE, Franck LS, Lee KA. Direct versus  
27 763 indirect psychosocial and behavioural interventions to prevent suicide and suicide attempts: a  
28 764 systematic review and meta-analysis. *Lancet Psychiatry* 2016;3(6):544-54.
- 29 765 107. O'Connor E, Gaynes BN, Burda BU, Soh C, Whitlock EP. Screening for and treatment of  
30 766 suicide risk relevant to primary care: a systematic review for the U.S. Preventive Services  
31 767 Task Force. *Ann Intern Med* 2013;158(10):741-54.
- 32 768 108. van der Feltz-Cornelis CM, Sarchiapone M, Postuvan V, et al. Best practice elements of  
33 769 multilevel suicide prevention strategies: a review of systematic reviews. *Crisis*  
34 770 *2011;32(6):319-33.*
- 35 771 109. Zalsman G, Hawton K, Wasserman D, et al. Suicide prevention strategies revisited: 10-year  
36 772 systematic review. *Lancet Psychiatry* 2016;3(7):646-59.
- 37 773 110. Lang UE, Beglinger C, Schweinfurth N, Walter M, Borgwardt S. Nutritional aspects of  
38 774 depression. *Cell Physiol Biochem* 2015;37(3):1029-43.
- 39 775 111. Williamson C. Dietary factors and depression in older people. *Br J Community Nurs*  
40 776 *2009;14(10):422,4-6.*
- 41 777 112. Chang SC, Cassidy A, Willett WC, Rimm EB, O'Reilly EJ, Okereke OI. Dietary flavonoid  
42 778 intake and risk of incident depression in midlife and older women. *Am J Clin Nutr*  
43 779 *2016;104(3):704-14.*
- 44 780 113. Chocano-Bedoya PO, O'Reilly EJ, Lucas M, et al. Prospective study on long-term dietary  
45 781 patterns and incident depression in middle-aged and older women. *Am J Clin Nutr*  
46 782 *2013;98(3):813-20.*

- 1  
2  
3 783 114. Colangelo LA, He K, Whooley MA, Daviglius ML, Liu K. Higher dietary intake of long-  
4 784 chain omega-3 polyunsaturated fatty acids is inversely associated with depressive symptoms  
5 785 in women. *Nutrition (California)* 2009;25(10):1011-9.  
6 786 115. Gopinath B, Flood VM, Burlutksy G, Louie JC, Mitchell P. Association between  
7 787 carbohydrate nutrition and prevalence of depressive symptoms in older adults. *Br J Nutr*  
8 788 2016;116(12):2109-14.  
9 789 116. Gougeon L, Payette H, Morais J, Gaudreau P, Shatenstein B, Gray-Donald K. Dietary  
10 790 patterns and incidence of depression in a cohort of community-dwelling older Canadians. *J*  
11 791 *Nutr Health Aging* 2015;19(4):431-6.  
12 792 117. Lehto SM, Ruusunen A, Tolmunen T, Voutilainen S, Tuomainen TP, Kauhanen J. Dietary  
13 793 zinc intake and the risk of depression in middle-aged men: a 20-year prospective follow-up  
14 794 study. *J Affect Disord* 2013;150(2):682-5.  
15 795 118. Li Y, Dai Q, Ekperi LI, Dehal A, Zhang J. Fish consumption and severely depressed mood,  
16 796 findings from the first national nutrition follow-up study. *Psychiatry Res* 2011;190(1):103-9.  
17 797 119. Lucas M, Mirzaei F, O'Reilly EJ, et al. Dietary intake of n-3 and n-6 fatty acids and the risk  
18 798 of clinical depression in women: a 10-y prospective follow-up study. *Am J Clin Nutr*  
19 799 2011;93(6):1337-43.  
20 800 120. Oddy WH, Hickling S, Smith MA, et al. Dietary intake of omega-3 fatty acids and risk of  
21 801 depressive symptoms in adolescents. *Depress Anxiety* 2011;28(7):582-8.  
22 802 121. Perez-Cornago A, Sanchez-Villegas A, Bes-Rastrollo M, et al. Relationship between  
23 803 adherence to Dietary Approaches to Stop Hypertension (DASH) diet indices and incidence of  
24 804 depression during up to 8 years of follow-up. *Public Health Nutr* 2016;20(13):1-10.  
25 805 122. Sanchez-Villegas A, Delgado-Rodriguez M, Alonso A, et al. Association of the  
26 806 Mediterranean dietary pattern with the incidence of depression: the Seguimiento Universidad  
27 807 de Navarra/University of Navarra follow-up (SUN) cohort. *Arch Gen Psychiatry*  
28 808 2009;66(10):1090-8.  
29 809 123. Sanchez-Villegas A, Henriquez-Sanchez P, Ruiz-Canela M, et al. A longitudinal analysis of  
30 810 diet quality scores and the risk of incident depression in the SUN Project. *BMC Med*  
31 811 2015;13:197.  
32 812 124. Sanchez-Villegas A, Verberne L, De Irala J, et al. Dietary fat intake and the risk of  
33 813 depression: the SUN Project. *PLoS ONE* 2011;6(1):e16268.  
34 814 125. Carter T, Morres ID, Meade O, Callaghan P. The Effect of exercise on depressive  
35 815 symptoms in adolescents: a systematic review and meta-analysis. *J Am Acad Child Adolesc*  
36 816 *Psychiatry* 2016;55(7):580-90.  
37 817 126. Cooney GM, Dwan K, Greig CA, et al. Exercise for depression. *Cochrane Database Syst*  
38 818 *Rev* 2013;(9):Cd004366.  
39 819 127. Danielsson L, Noras AM, Waern M, Carlsson J. Exercise in the treatment of major  
40 820 depression: a systematic review grading the quality of evidence. *Physiother Theory Pract*  
41 821 2013;29(8):573-85.  
42 822 128. de Souza Moura AM, Lamego MK, Paes F, et al. Comparison among aerobic exercise and  
43 823 other types of interventions to treat depression: a systematic review. *CNS Neurol Disord*  
44 824 *Drug Targets* 2015;14(9):1171-83.  
45 825 129. Garcia-Toro M, Ibarra O, Gili M, et al. Four hygienic-dietary recommendations as add-on  
46 826 treatment in depression: a randomized-controlled trial. *J Affect Disord* 2012;140(2):200-3.

- 1  
2  
3 827 130. Gartlehner G, Gaynes BN, Amick HR, et al. Comparative benefits and harms of  
4 828 antidepressant, psychological, complementary, and exercise treatments for major depression:  
5 829 an evidence report for a clinical practice guideline from the American College of Physicians.  
6 830 *Ann Intern Med* 2016;164(5):331-41.
- 8 831 131. Hearing CM, Chang WC, Szuhany KL, Deckersbach T, Nierenberg AA, Sylvia LG.  
9 832 Physical exercise for treatment of mood disorders: a critical review. *Curr Behav Neurosci*  
10 833 *Rep* 2016;3(4):350-9.
- 11 834 132. Herring MP, Puetz TW, O'Connor PJ, Dishman RK. Effect of exercise training on  
12 835 depressive symptoms among patients with a chronic illness: a systematic review and meta-  
13 836 analysis of randomized controlled trials. *Arch Intern Med* 2012;172(2):101-11.
- 15 837 133. Josefsson T, Lindwall M, Archer T. Physical exercise intervention in depressive disorders:  
16 838 meta-analysis and systematic review. *Scand J Med Sci Sports* 2014;24(2):259-72.
- 17 839 134. Knapen J, Vancampfort D, Morien Y, Marchal Y. Exercise therapy improves both mental  
18 840 and physical health in patients with major depression. *Disabil Rehabil* 2015;37(16):1490-5.
- 19 841 135. Kvam S, Kleppe CL, Nordhus IH, Hovland A. Exercise as a treatment for depression: a  
20 842 meta-analysis. *J Affect Disord* 2016;202:67-86.
- 22 843 136. Meekums B, Karkou V, Nelson EA. Dance movement therapy for depression. *Cochrane*  
23 844 *Database Syst Rev* 2015;(2):Cd009895.
- 24 845 137. Mura G, Carta MG. Physical activity in depressed elderly. A systematic review. *Clin Pract*  
25 846 *Epidemiol Ment Health* 2013;9:125-35.
- 26 847 138. Mura G, Moro MF, Patten SB, Carta MG. Exercise as an add-on strategy for the treatment  
27 848 of major depressive disorder: a systematic review. *CNS Spectr* 2014;19(6):496-508.
- 28 849 139. Netz Y. Is the comparison between exercise and pharmacologic treatment of depression in  
29 850 the clinical practice guideline of the American College of Physicians evidence-based? *Front*  
30 851 *Pharmacol* 2017;8:257.
- 32 852 140. Park SC, Oh HS, Oh DH, et al. Evidence-based, non-pharmacological treatment guideline  
33 853 for depression in Korea. *J Korean Med Sci* 2014;29(1):12-22.
- 34 854 141. Qaseem A, Barry MJ, Kansagara D. Nonpharmacologic versus pharmacologic treatment of  
35 855 adult patients with major depressive disorder: a clinical practice guideline from the American  
36 856 College of Physicians. *Ann Intern Med* 2016;164(5):350-9.
- 38 857 142. Radovic S, Gordon MS, Melvin GA. Should we recommend exercise to adolescents with  
39 858 depressive symptoms? A meta-analysis. *J Paediatr Child Health* 2017;53(3):214-20.
- 40 859 143. Ranjbar E, Memari AH, Hafizi S, Shayestehfar M, Mirfazeli FS, Eshghi MA. Depression  
41 860 and exercise: a clinical review and management guideline. *Asian J Sports Med*  
42 861 2015;6(2):e24055.
- 43 862 144. Ravindran AV, da Silva TL. Complementary and alternative therapies as add-on to  
44 863 pharmacotherapy for mood and anxiety disorders: a systematic review. *J Affect Disord*  
45 864 2013;150(3):707-19.
- 47 865 145. Ravindran AV, Lam RW, Filteau MJ, et al. Canadian Network for Mood and Anxiety  
48 866 Treatments (CANMAT) clinical guidelines for the management of major depressive disorder  
49 867 in adults. V. Complementary and alternative medicine treatments. *J Affect Disord*  
50 868 2009;117,1:S54-S64.
- 51 869 146. Rethorst CD, Trivedi MH. Evidence-based recommendations for the prescription of  
52 870 exercise for major depressive disorder. *J Psychiatr Pract* 2013;19(3):204-12.



- 1  
2  
3 871 147. Rhyner KT, Watts A. Exercise and depressive symptoms in older adults: a systematic meta-  
4 872 analytic review. *J Aging Phys Act* 2016;24(2):234-46.
- 5 873 148. Schuch FB, Vancampfort D, Richards J, Rosenbaum S, Ward PB, Stubbs B. Exercise as a  
6 874 treatment for depression: a meta-analysis adjusting for publication bias. *J Psychiatr Res*  
7 875 2016b;77:42-51.
- 8 876 149. Schuch FB, Vancampfort D, Rosenbaum S, et al. Exercise for depression in older adults: a  
9 877 meta-analysis of randomized controlled trials adjusting for publication bias. *Rev Bras*  
10 878 *Psiquiatr* 2016a;38(3):247-54.
- 11 879 150. Serrano Ripoll MJ, Olivan-Blazquez B, Vicens-Pons E, et al. Lifestyle change  
12 880 recommendations in major depression: do they work? *J Affect Disord* 2015;183:221-8.
- 13 881 151. Shivakumar G, Brandon AR, Snell PG, et al. Antenatal depression: a rationale for studying  
14 882 exercise. *Depress Anxiety* 2011;28(3):234-42.
- 15 883 152. Goodman SH, Rouse MH, Connell AM, Broth MR, Hall CM, Heyward D. Maternal  
16 884 depression and child psychopathology: a meta-analytic review. *Clin Child Fam Psychol Rev*  
17 885 2011;14(1):1-27.
- 18 886 153. Sanger C, Iles JE, Andrew CS, Ramchandani PG. Associations between postnatal maternal  
19 887 depression and psychological outcomes in adolescent offspring: a systematic review. *Arch*  
20 888 *Womens Ment Health* 2015;18(2):147-62.
- 21 889 154. Sui G, Pan B, Liu G, Liu G, Wang L. The long-term effects of maternal postnatal  
22 890 depression on a child's intelligence quotient: a meta-analysis of prospective cohort studies  
23 891 based on 974 cases. *J Clin Psychiatry* 2016;77(11):e1474-e82.
- 24 892 155. Lampard AM, Franckle RL, Davison KK. Maternal depression and childhood obesity: a  
25 893 systematic review. *Prev Med* 2014;59:60-7.
- 26 894 156. Hendricks K, Liu J. Maternal depression and childhood aggression: literature review. *MCN*  
27 895 *Am J Matern Child Nurs* 2012;37(4):253-61.
- 28 896 157. Correia LL, Linhares MB. Maternal anxiety in the pre- and postnatal period: a literature  
29 897 review. *Rev Lat Am Enfermagem* 2007;15(4):677-83.
- 30 898 158. Waters CS, Hay DF, Simmonds JR, van Goozen SH. Antenatal depression and children's  
31 899 developmental outcomes: potential mechanisms and treatment options. *Eur Child Adolesc*  
32 900 *Psychiatry* 2014;23(10):957-71.
- 33 901 159. Joyce S, Modini M, Christensen H, et al. Workplace interventions for common mental  
34 902 disorders: a systematic meta-review. *Psychol Med* 2016;46(4):683-97.
- 35 903 160. Tan L, Wang MJ, Modini M, et al. Preventing the development of depression at work: a  
36 904 systematic review and meta-analysis of universal interventions in the workplace. *BMC Med*  
37 905 2014;12:74.
- 38 906 161. Chu AH, Koh D, Moy FM, Muller-Riemenschneider F. Do workplace physical activity  
39 907 interventions improve mental health outcomes? *Occup Med (Lond)* 2014;64(4):235-45.
- 40 908 162. Dietrich S, Deckert S, Ceynowa M, Hegerl U, Stengler K. Depression in the workplace: a  
41 909 systematic review of evidence-based prevention strategies. *Int Arch Occup Environ Health*  
42 910 2012;85(1):1-11.
- 43 911 163. Martin A, Sanderson K, Cocker F. Meta-analysis of the effects of health promotion  
44 912 intervention in the workplace on depression and anxiety symptoms. *Scand J Work Environ*  
45 913 *Health* 2009;35(1):7-18.
- 46 914 164. Nieuwenhuijsen K, Faber B, Verbeek JH, et al. Interventions to improve return to work in  
47 915 depressed people. *Cochrane Database Syst Rev* 2014;Dec 3(12):CD006237.

- 1  
2  
3 916 165. Furlan AD, Gnam WH, Carnide N, et al. Systematic review of intervention practices for  
4 917 depression in the workplace. *J Occup Rehabil* 2012;22(3):312-21.  
5 918 166. Cousins L, Goodyer IM. Antidepressants and the adolescent brain. *J Psychopharmacol*  
6 919 *(England)* 2015;29(5):545-55.  
7 920 167. Tao R. Brain activity in adolescent major depressive disorder before and after fluoxetine  
8 921 treatment. *Am J Psychiatry* 2012;169:381-8.  
9 922 168. Brady P, Kangas M, McGill K. "Family matters": a systematic review of the evidence for  
10 923 family psychoeducation for major depressive disorder. *J Marital Fam Ther* 2017;43(2):245-  
11 924 63.  
12 925 169. Meis LA, Griffin JM, Greer N, et al. Couple and family involvement in adult mental health  
13 926 treatment: a systematic review. *Clin Psychol Rev* 2013;33(2):275-86.  
14 927 170. Stahl ST, Rodakowski J, Saghafi EM, Park M, Reynolds CF, Dew MA. Systematic review  
15 928 of dyadic and family-oriented interventions for late-life depression. *Int J Geriatr Psychiatry*  
16 929 2016;31(9):963-73.  
17 930 171. Vallury KD, Jones M, Gray R. Do family-oriented interventions reduce poststroke  
18 931 depression? A systematic review and recommendations for practice. *Top Stroke Rehabil*  
19 932 2015;22(6):453-9.  
20 933 172. Wang F, Luo D, Fu L, et al. The efficacy of couple-based interventions on health-related  
21 934 quality of life in cancer patients and their spouses: a meta-analysis of 12 randomized  
22 935 controlled trials. *Cancer Nurs* 2017;40(1):39-47.  
23 936 173. MQ: Transforming mental health. [Internet]. Depression: asking the right questions. January  
24 937 2016. Project report. Identifying priorities for depression research. [cited February 22, 2019].  
25 938 Available from [http://www.jla.nihr.ac.uk/priority-setting-](http://www.jla.nihr.ac.uk/priority-setting-partnerships/depression/downloads/Depression-PSP-final-report.pdf)  
26 939 [partnerships/depression/downloads/Depression-PSP-final-report.pdf](http://www.jla.nihr.ac.uk/priority-setting-partnerships/depression/downloads/Depression-PSP-final-report.pdf)

940

|                                                                                                                                                                                                              |                                                                                                                                                                                    |
|--------------------------------------------------------------------------------------------------------------------------------------------------------------------------------------------------------------|------------------------------------------------------------------------------------------------------------------------------------------------------------------------------------|
| 1. Which treatment therapy or method is more successful for long term remission or recovery?                                                                                                                 | 7. Can diet or exercise affect the development of depression?                                                                                                                      |
| 2. What are the long term physical implications of pharmacotherapy for treating depression?                                                                                                                  | 8. What are the functional, social, intellectual, physical and psychological problems experienced by children and teens living with an immediate family member who has depression? |
| 3. For various treatment options (e.g. psychotherapy, individual vs. group psychotherapy and psychosocial support), what are the advantages in terms of cost, effectiveness, relapse, prevention and safety? | 9. What interventions are effective in preventing and treating workplace depression and reducing stigma associated with depression in the workplace?                               |
| 4. What are the prevention strategies/tactics for reducing self-harm and suicide in children, youth and adults with depression?                                                                              | 10. Are there structural or functional changes in the brain due to antidepressant therapy during brain development?                                                                |
| 5. What changes to the health care system will increase access to psychological services?                                                                                                                    | 11. What is the role of family in the treatment and trajectory of depression?                                                                                                      |
| 6. What changes in the health care system will result in shortened wait times for depression services?                                                                                                       |                                                                                                                                                                                    |

FIGURE 1. Alberta's Top 11 Patient-Identified Depression Research Priorities<sup>14</sup>

144x66mm (300 x 300 DPI)



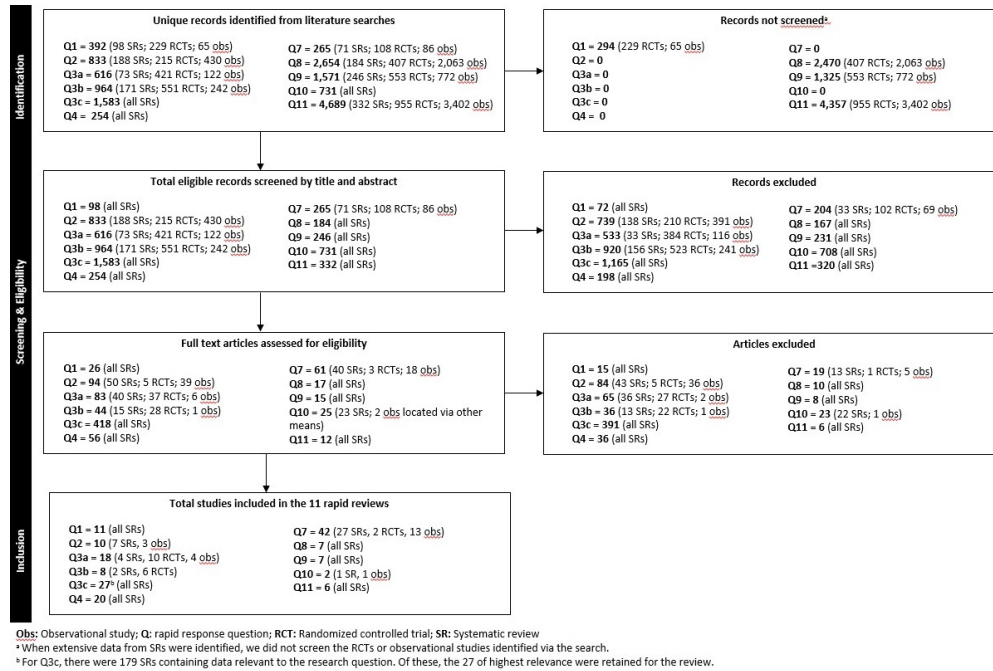

FIGURE 2. Flow diagram of screening decisions

101x68mm (300 x 300 DPI)

## APPENDIX 1: SEARCH STRATEGIES

### Depression Research Priority #: 1

**Priority:** Which treatment therapy or method is more successful for long term remission or recovery?

**Suggested review question (reviewer generated):** For patients with diagnosed depression, do pharmacotherapies (e.g., SSRIs) result in long term recovery/remission (e.g., cessation of drug therapy) compared with psychotherapy (e.g., CBT)?

**Date conducted:** 27 July 2017

**Database:** PubMed via NCBI Entrez (1946- )

**Records Retrieved:** 390

#### Strategy:

#1 Search ("Bipolar and Related Disorders"[Mesh] OR "Depression"[Mesh] OR "Depressive Disorder"[Mesh] OR "Mood Disorders"[Mesh:NoExp] OR affective disorder[tiab] OR affective disorders[tiab] OR bipolar[tiab] OR depression[tiab] OR depressive[tiab] OR depressives[tiab] OR manic disorder[tiab] OR manic disorders[tiab] OR mood disorder[tiab] OR mood disorders[tiab])

#2 Search ("Adrenergic Uptake Inhibitors"[Mesh] OR "Antidepressive Agents"[Mesh] OR "Bipolar and Related Disorders/drug therapy"[Mesh] OR "Depression/drug therapy"[Mesh] OR "Depressive Disorder/drug therapy"[Mesh] OR Fluvoxamine[Mesh] OR "Monoamine Oxidase Inhibitors"[Mesh] OR "Mood Disorders/drug therapy"[Mesh:NoExp] OR "Serotonin and Noradrenaline Reuptake Inhibitors"[Mesh] OR "Serotonin Uptake Inhibitors"[Mesh] OR anti-depressant[tiab] OR anti-depressants[tiab] OR anti-depressive agent[tiab] OR anti-depressive agents[tiab] OR antidepressant[tiab] OR antidepressants[tiab] OR antidepressive agent[tiab] OR antidepressive agents[tiab] OR fluvoxamine[tiab] OR MAOIs[tiab] OR monoamine oxidase inhibitors[tiab] OR serotonin reuptake inhibitor[tiab] OR serotonin reuptake inhibitors[tiab] OR SNRI[tiab] OR SNRIs[tiab] OR SSRI[tiab] OR SSRIs[tiab])

#3 Search ("Psychotherapy"[Mesh] OR behavioral therapy[tiab] OR behavioral therapies[tiab] OR behavioural therapy[tiab] OR behavioural therapies[tiab] OR CBT[tiab] OR cognitive therapy[tiab] OR cognitive therapies[tiab] OR group therapy[tiab] OR interpersonal therapy[tiab] OR interpersonal therapies[tiab] OR mindfulness[tiab] OR psycho-therapy[tiab] OR psycho-therapies[tiab] OR psychodynamic therapy[tiab] OR psychodynamic therapies[tiab] OR psychological therapy[tiab] OR psychological therapies[tiab] OR psychotherapy[tiab] OR psychotherapies[tiab] OR talk therapy[tiab])

#4 Search ("Convalescence"[Mesh] OR "Disease-Free Survival"[Mesh] OR "Recovery of Function"[Mesh] OR "Remission Induction"[Mesh:NoExp] recover[tiab] OR recovers[tiab] OR recovered[tiab] OR recovery[tiab] OR remission[tiab] OR (successful[tiab] AND (treatment[tiab] OR treatments[tiab] OR therapy[tiab] OR therapies[tiab])))

#5 Search #1 AND #2 AND #3 AND #4

#6 Search editorial[pt] OR comment[pt] OR letter[pt] OR newspaper article[pt]

#7 Search #5 NOT #6

1  
2  
3 #8 Search #7 AND *Systematic review filter*<sup>1</sup>: Publication date from 2007/01/01 to 2017/12/31;  
4 English

5  
6 #9 Search #7 AND *Randomized controlled trial filter*<sup>1</sup>: Publication date from 2007/01/01 to  
7 2017/12/31; English

8  
9 #10 Search #7 AND *Observational studies filter*<sup>1</sup>: Publication date from 2007/01/01 to  
10 2017/12/31; English  
11  
12  
13  
14  
15  
16  
17  
18  
19  
20  
21  
22  
23  
24  
25  
26  
27  
28  
29  
30  
31  
32  
33  
34  
35  
36  
37  
38  
39  
40  
41  
42  
43  
44  
45  
46  
47  
48  
49  
50  
51  
52

53  
54 <sup>1</sup> Strings attached: CADTH database search filters [Internet]. Ottawa: CADTH; 2016. [cited 2018 Jan 26]. Available  
55 from: <https://www.cadth.ca/resources/finding-evidence/>

**Depression Research Priority #: 2**

**Priority:** What are the long term physical implications of pharmacotherapy for treating depression?

**Suggested research question (reviewer generated):** Does pharmacotherapy (antidepressants) for patients with diagnosed depression adversely impact long term physiological development?

**Date conducted:** 22 August 2017

**Database:** PubMed via NCBI Entrez (1946- )

**Records Retrieved:** 835

**Strategy:**

#1 Search ("Bipolar and Related Disorders"[Mesh] OR "Depression"[Mesh] OR "Depressive Disorder"[Mesh] OR "Mood Disorders"[Mesh:NoExp] OR affective disorder[tiab] OR affective disorders[tiab] OR bipolar[tiab] OR depression[tiab] OR depressive[tiab] OR depressives[tiab] OR manic disorder[tiab] OR manic disorders[tiab] OR mood disorder[tiab] OR mood disorders[tiab])

#2 Search "Antidepressive Agents/adverse effects"[Mesh] OR "Antidepressive Agents/contraindications"[Mesh] OR "Antidepressive Agents/poisoning"[Mesh] OR "Antidepressive Agents/toxicity"[Mesh] OR "Serotonin Syndrome"[Mesh] OR "Serotonin Uptake Inhibitors/adverse effects"[Mesh] OR "Serotonin Uptake Inhibitors/contraindications"[Mesh] OR "Serotonin Uptake Inhibitors/poisoning"[Mesh] OR "Serotonin Uptake Inhibitors/toxicity"[Mesh] OR ("Antidepressive Agents"[Mesh] OR "Serotonin Uptake Inhibitors"[Mesh] OR anti-depressant[tiab] OR anti-depressants[tiab] OR anti-depressive agent[tiab] OR anti-depressive agents[tiab] OR antidepressant[tiab] OR antidepressants[tiab] OR antidepressive agent[tiab] OR antidepressive agents[tiab] OR serotonin reuptake inhibitor[tiab] OR serotonin reuptake inhibitors[tiab] OR SSRI[tiab] OR SSRIs[tiab]) AND ("Abnormalities, Drug-Induced"[Mesh] OR "Drug Recalls"[Mesh] OR "Drug-Related Side Effects and Adverse Reactions"[Mesh:NoExp] OR "Product Surveillance, Postmarketing"[Mesh] OR "Safety-Based Drug Withdrawals"[Mesh] OR adverse[ti] OR ((adverse[tiab] OR harm[tiab] OR harmed[tiab] OR harmful[tiab] OR harms[tiab] OR injurious[tiab] OR serious[tiab] OR toxic[tiab] OR undesirable[tiab]) AND (effect[tiab] OR effects[tiab] OR event[tiab] OR events[tiab] OR outcome[tiab] OR outcomes[tiab] OR incident[tiab] OR incidents[tiab] OR reaction[tiab] OR reactions[tiab])) OR adversely[ti] OR chemically induced[tiab] OR complication[tiab] OR complications[tiab] OR drug induced[tiab] OR harm[ti] OR harmed[ti] OR harmful[ti] OR harms[ti] OR injurious[ti] OR poison[tiab] OR poisonous[tiab] OR reaction[ti] OR reactions[ti] OR recalled[tiab] OR recall[tiab] OR recalls[tiab] OR risk[tiab] OR risks[tiab] OR safe[tiab] OR safety[tiab] OR side effect[tiab] OR side effects[tiab] OR toxic[tiab] OR toxicities[tiab] OR toxicity[tiab] OR toxicologic[tiab] OR toxicological[tiab] OR toxicologically[tiab] OR toxicology[tiab] OR undesirable[tiab] OR unsafe[tiab] OR warning[tiab] OR warnings[ti] OR withdrawal[tiab] OR withdrawals[tiab] OR withdrawn[tiab]))

#3 Search "Connective Tissue Cells"[Mesh] OR "Growth and Development"[Mesh:NoExp] OR "Growth"[Mesh] OR "Human Development"[Mesh] OR "Musculoskeletal Physiological Phenomena"[Mesh:NoExp] OR "Musculoskeletal Development"[Mesh] OR "Musculoskeletal System"[Mesh] OR bone[tiab] OR bones[tiab] OR cartilage[tiab] OR cell[tiab] OR cells[tiab] OR cellular[tiab] OR ((delay[tiab] OR delays[tiab] OR develop[tiab] OR developed[tiab] OR developing[tiab] OR development[tiab] OR developmental[tiab] OR impair[tiab] OR impaired[tiab] OR impairment[tiab] OR impairments[tiab] OR impairs[tiab]) AND (function[tiab] OR functional[tiab] OR functioning[tiab] OR functions[tiab] OR physical[tiab] OR

3

Appendix 1 - Evidence for Patient-Identified Priorities in Depression Research

1  
2  
3 physically[tiab] OR physiological[tiab])) OR grow[tiab] OR growth[tiab] OR fiber[tiab] OR  
4 fibers[tiab] OR fibre[tiab] OR fibres[tiab] OR ligament[tiab] OR ligaments[tiab] OR muscle[tiab]  
5 OR muscles[tiab] OR muscular[tiab] OR musculoskeletal[tiab] OR myogenesis[tiab] OR  
6 skeletal[tiab] OR tendon[tiab] OR tendons[tiab] OR tissue[tiab] OR tissues[tiab]  
7

8 #4 Search #1 AND #2 AND #3  
9

10 #5 Search editorial[pt] OR comment[pt] OR letter[pt] OR newspaper article[pt]  
11

12 #6 Search #4 NOT #5  
13

14 #7 Search #6 AND *Systematic review filter*. Publication date from 2007/01/01 to 2017/12/31;  
15 English  
16

17 #8 Search #6 AND *Randomized controlled trial filter*. Publication date from 2007/01/01 to  
18 2017/12/31; English  
19

20 #9 Search #6 AND *Observational studies filter*. Publication date from 2007/01/01 to  
21 2017/12/31; English  
22  
23  
24  
25  
26  
27  
28  
29  
30  
31  
32  
33  
34  
35  
36  
37  
38  
39  
40  
41  
42  
43  
44  
45  
46  
47  
48  
49  
50  
51  
52  
53  
54  
55  
56

**Depression Research Priority #: 3a**

**Priority:** For various treatment options (eg. psychotherapy, individual vs. group psychotherapy and psychosocial support), what are the advantages in terms of cost?

**Suggested question (reviewer generated):** How cost-effective are psychological therapies for depression?

**Date conducted:** 25 August 2017

**Database:** PubMed via NCBI Entrez (1946- )

**Records Retrieved:** 615

**Strategy:**

#1 Search ("Bipolar and Related Disorders"[Mesh] OR "Depression"[Mesh] OR "Depressive Disorder"[Mesh] OR "Mood Disorders"[Mesh:NoExp] OR affective disorder[tiab] OR affective disorders[tiab] OR bipolar[tiab] OR depression[tiab] OR depressive[tiab] OR depressives[tiab] OR manic disorder[tiab] OR manic disorders[tiab] OR mood disorder[tiab] OR mood disorders[tiab])

#2 Search ("Psychotherapy"[Mesh] OR behavioral therapy[tiab] OR behavioral therapies[tiab] OR behavioural therapy[tiab] OR behavioural therapies[tiab] OR CBT[tiab] OR cognitive therapy[tiab] OR cognitive therapies[tiab] OR group therapy[tiab] OR interpersonal therapy[tiab] OR interpersonal therapies[tiab] OR mindfulness[tiab] OR psycho-therapy[tiab] OR psycho-therapies[tiab] OR psychodynamic therapy[tiab] OR psychodynamic therapies[tiab] OR psychological therapy[tiab] OR psychological therapies[tiab] OR psychotherapy[tiab] OR psychotherapies[tiab] OR talk therapy[tiab])

#3 Search #1 AND #2

#4 Search #3 AND *Economics filter*

#5 Search editorial[pt] OR comment[pt] OR letter[pt] OR newspaper article[pt]

#6 Search #4 NOT #5

#7 Search #6 AND *Systematic review filter*. Publication date from 2007/01/01 to 2017/12/31; English

#8 Search #6 AND *Randomized controlled trial filter*. Publication date from 2007/01/01 to 2017/12/31; English

#9 Search #6 AND *Observational studies filter*. Publication date from 2007/01/01 to 2017/12/31; English

**Depression Research Priority #: 3b**

**Priority:** For various treatment options (eg. psychotherapy, individual vs. group psychotherapy and psychosocial support), what are the advantages in terms of safety?

**Suggested question (reviewer generated):** What are the harms associated with psychological therapies for depression?

**Date conducted:** 29 August 2017

**Database:** PubMed via NCBI Entrez (1946- )

**Records Retrieved:** 964

**Strategy:**

#1 Search "Bipolar and Related Disorders"[Mesh] OR "Depression"[Mesh] OR "Depressive Disorder"[Mesh] OR "Mood Disorders"[Mesh:NoExp] OR affective disorder[tiab] OR affective disorders[tiab] OR bipolar[tiab] OR depression[tiab] OR depressive[tiab] OR depressives[tiab] OR manic disorder[tiab] OR manic disorders[tiab] OR mood disorder[tiab] OR mood disorders[tiab]

#2 Search "Psychotherapy/adverse effects"[Mesh] OR (("Psychotherapy"[Majr] OR behavioral therapy[ti] OR behavioral therapies[ti] OR behavioural therapy[ti] OR behavioural therapies[ti] OR CBT[ti] OR cognitive therapy[ti] OR cognitive therapies[ti] OR group therapy[ti] OR interpersonal therapy[ti] OR interpersonal therapies[ti] OR mindfulness[ti] OR psychotherapy[ti] OR psycho-therapies[ti] OR psychodynamic therapy[ti] OR psychodynamic therapies[ti] OR psychological therapy[ti] OR psychological therapies[ti] OR psychotherapy[ti] OR psychotherapies[ti] OR talk therapy[ti]) AND ("Patient Harm"[Mesh] OR adverse[ti] OR ((adverse[tiab] OR harm[tiab] OR harmed[tiab] OR harmful[tiab] OR harms[tiab] OR injurious[tiab] OR negative[tiab] OR serious[tiab] OR undesirable[tiab]) AND (effect[tiab] OR effects[tiab] OR event[tiab] OR events[tiab] OR outcome[tiab] OR outcomes[tiab] OR incident[tiab] OR incidents[tiab] OR response[tiab] OR responses[tiab]))) OR adversely[ti] OR drop out[ti] OR drop outs[ti] OR dropout[ti] OR dropouts[ti] OR harm[ti] OR harmed[ti] OR harmful[ti] OR harms[ti] OR injurious[ti] OR risk[ti] OR risks[ti] OR safe[ti] OR safety[ti] OR undesirable[ti] OR unsafe[ti] OR warning[ti] OR warnings[ti]))

#3 Search #1 AND #2

#4 Search editorial[pt] OR comment[pt] OR letter[pt] OR newspaper article[pt]

#5 Search #3 NOT #4

#6 Search #5 AND *Systematic review filter*: Publication date from 2007/01/01 to 2017/12/31; English

#7 Search #5 AND *Randomized controlled trial filter*: Publication date from 2007/01/01 to 2017/12/31; English

#8 Search #5 AND *Observational studies filter*: Publication date from 2007/01/01 to 2017/12/31; English



**Depression Research Priority #: 3c**

**Priority:** For various treatment options (eg. Psychotherapy, individual vs. group psychotherapy and psychosocial support), what are the advantages in terms of effectiveness and relapse prevention?

**Suggested question (reviewer generated):** How effective are psychological therapies for depression?

**Date conducted:** 7 September 2017

**Database:** PubMed via NCBI Entrez (1946- )

**Records Retrieved:** 1589

**Strategy:**

#1 Search "Bipolar and Related Disorders"[Mesh] OR "Depression"[Mesh] OR "Depressive Disorder"[Mesh] OR "Mood Disorders"[Mesh:NoExp] OR affective disorder[tiab] OR affective disorders[tiab] OR bipolar[tiab] OR depression[tiab] OR depressive[tiab] OR depressives[tiab] OR manic disorder[tiab] OR manic disorders[tiab] OR mood disorder[tiab] OR mood disorders[tiab]

#2 Search ("Psychotherapy"[Mesh] OR behavioral therapy[tiab] OR behavioral therapies[tiab] OR behavioural therapy[tiab] OR behavioural therapies[tiab] OR CBT[tiab] OR cognitive therapy[tiab] OR cognitive therapies[tiab] OR group therapy[tiab] OR interpersonal therapy[tiab] OR interpersonal therapies[tiab] OR mindfulness[tiab] OR psycho-therapy[tiab] OR psycho-therapies[tiab] OR psychodynamic therapy[tiab] OR psychodynamic therapies[tiab] OR psychological therapy[tiab] OR psychological therapies[tiab] OR psychotherapy[tiab] OR psychotherapies[tiab] OR talk therapy[tiab])

#3 Search #1 AND #2

#4 Search editorial[pt] OR comment[pt] OR letter[pt] OR newspaper article[pt]

#5 Search #3 NOT #4

#6 Search #5 AND *Systematic review filter*. Publication date from 2007/01/01 to 2017/12/31; English

**Depression Research Priority #: 4**

**Priority:** What are the prevention strategies/tactics for reducing self-harm and suicide in children, youth and adults with depression?

**Suggested question (reviewer generated):** What are effective suicide and self-harm prevention interventions for patients with diagnosed depression?

**Date conducted:** 26 September 2017

**Database:** PubMed via NCBI Entrez (1946- )

**Records Retrieved:** 254

**Strategy:**

#1 Search "Bipolar and Related Disorders"[Mesh] OR "Depression"[Mesh] OR "Depressive Disorder"[Mesh] OR "Mood Disorders"[Mesh:NoExp] OR affective disorder[tiab] OR affective disorders[tiab] OR bipolar[tiab] OR depression[tiab] OR depressive[tiab] OR depressives[tiab] OR manic disorder[tiab] OR manic disorders[tiab] OR mood disorder[tiab] OR mood disorders[tiab]

#2 Search "Self-Injurious Behavior/prevention and control"[Mesh:NoExp] OR "Self Mutilation/prevention and control"[Mesh] OR "Suicide/prevention and control"[Mesh:NoExp] OR "Suicide, Attempted/prevention and control"[Mesh] OR ((self harm[tiab] OR self injurious[tiab] OR self injury[tiab] OR suicidal[tiab] OR suicide[tiab] OR suicides[tiab]) AND (deter[tiab] OR detered[tiab] OR deterrence[tiab] OR prevent[tiab] OR prevented[tiab] OR prevention[tiab] OR prevents[tiab] OR reduce[tiab] OR reduced[tiab] OR reduces[tiab] OR reduction[tiab] OR reductions[tiab]))

#3 Search #1 AND #2

#4 Search editorial[pt] OR comment[pt] OR letter[pt] OR newspaper article[pt]

#5 Search #3 NOT #4

#6 Search #5 AND *Systematic review filter*. Publication date from 2007/01/01 to 2017/12/31; English

**Depression Research Priority #: 7****Priority:** Can diet or exercise affect the development of depression?**Suggested question (reviewer generated):** For patients with diagnosed depression, are diet or exercise comparatively effective as pharmacotherapy (antidepressants) for managing symptoms and improving patient quality of life?**Date conducted:** 1 August 2017**Database:** PubMed via NCBI Entrez (1946- )**Records Retrieved:** 265**Strategy:**

#1 Search "Bipolar and Related Disorders"[Mesh] OR "Depression"[Mesh] OR "Depressive Disorder"[Mesh] OR "Mood Disorders"[Mesh:NoExp] OR affective disorder[tiab] OR affective disorders[tiab] OR bipolar[tiab] OR depression[tiab] OR depressive[tiab] OR depressives[tiab] OR manic disorder[tiab] OR manic disorders[tiab] OR mood disorder[tiab] OR mood disorders[tiab]

#2 Search "Bipolar and Related Disorders/diet therapy"[Majr] OR "Depression/diet therapy"[Majr] OR "Depressive Disorder/diet therapy"[Majr] OR "Diet Therapy"[Mesh] OR "Exercise"[Mesh] OR "Exercise Movement Techniques"[Mesh] OR "Exercise Therapy"[Mesh] OR "Mood Disorders/diet therapy"[Majr:NoExp] OR "Physical Fitness"[Mesh] OR diet[ti] OR dietary[ti] OR exercise[ti] OR physical activity[ti] OR physical therapy[ti]

#3 Search "Adrenergic Uptake Inhibitors"[Mesh] OR "Antidepressive Agents"[Mesh] OR "Bipolar and Related Disorders/drug therapy"[Mesh] OR "Depression/drug therapy"[Mesh] OR "Depressive Disorder/drug therapy"[Mesh] OR Fluvoxamine[Mesh] OR "Monoamine Oxidase Inhibitors"[Mesh] OR "Mood Disorders/drug therapy"[Mesh:NoExp] OR "Serotonin and Noradrenaline Reuptake Inhibitors"[Mesh] OR "Serotonin Uptake Inhibitors"[Mesh] OR anti-depressant[tiab] OR anti-depressants[tiab] OR anti-depressive agent[tiab] OR anti-depressive agents[tiab] OR antidepressant[tiab] OR antidepressants[tiab] OR antidepressive agent[tiab] OR antidepressive agents[tiab] OR fluvoxamine[tiab] OR MAOIs[tiab] OR monoamine oxidase inhibitors[tiab] OR serotonin reuptake inhibitor[tiab] OR serotonin reuptake inhibitors[tiab] OR SNRI[tiab] OR SNRIs[tiab] OR SSRI[tiab] OR SSRIs[tiab]

#4 Search #1 AND #2 AND #3

#5 Search editorial[pt] OR comment[pt] OR letter[pt] OR newspaper article[pt]

#6 Search #4 NOT #5

#7 Search #6 AND *Systematic review filter*: Publication date from 2007/01/01 to 2017/12/31; English

#8 Search #6 AND *Randomized controlled trial filter*: Publication date from 2007/01/01 to 2017/12/31; English

#9 Search #6 AND *Observational studies filter*: Publication date from 2007/01/01 to 2017/12/31; English

**Depression Research Priority #: 8**

**Priority:** What are the functional, social, intellectual, physical and psychological problems experience by children and teens living with an immediate family member who has depression?

**Suggested question (reviewer generated):** For children and adolescents, what are the harms associated with living with a family member with diagnosed depression?

**Date conducted:** 5 August 2017

**Database:** PubMed via NCBI Entrez (1946- )

**Records Retrieved:** 2654

**Strategy:**

#1 Search "Bipolar and Related Disorders"[Mesh] OR "Depression"[Mesh] OR "Depressive Disorder"[Mesh] OR "Mood Disorders"[Mesh:NoExp] OR affective disorder[tiab] OR affective disorders[tiab] OR bipolar[tiab] OR depression[tiab] OR depressive[tiab] OR depressives[tiab] OR manic disorder[tiab] OR manic disorders[tiab] OR mood disorder[tiab] OR mood disorders[tiab]

#2 Search "Adolescent"[Mesh] OR "Child"[Mesh] OR "Minors"[Mesh] OR adolescence[tiab] OR adolescent[tiab] OR adolescents[tiab] OR child[tiab] OR childhood[tiab] OR children[tiab] OR childrens[tiab] OR childs[tiab] OR preschooler[tiab] OR preschoolers[tiab] OR teen[tiab] OR teenaged[tiab] OR teenager[tiab] OR teenagers[tiab] OR teens[tiab] OR toddler[tiab] OR toddlers[tiab] OR youth[tiab] OR youths[tiab]

#3 Search "Family Relations"[Majr] OR family member[ti] OR family members[ti] OR father[ti] OR fathers[ti] OR grandparent[ti] OR grandparents[ti] OR mother[ti] OR mothers[tiab] OR parent[ti] OR parents[ti] OR relative[ti] OR relatives[ti] OR sibling[ti] OR siblings[ti]

#4 Search abuse[tiab] OR abused[tiab] OR abuses[tiab] OR abusing[tiab] OR challenge[tiab] OR challenges[tiab] OR challenging[tiab] OR damage[tiab] OR damaged[tiab] OR damages[tiab] OR damaging[tiab] OR experience[tiab] OR experienced[tiab] OR experiences[tiab] OR experiencing[tiab] OR expose[tiab] OR exposed[tiab] OR exposes[tiab] OR exposing[tiab] OR exposure[tiab] OR issue[tiab] OR issues[tiab] OR harm[tiab] OR harmed[tiab] OR harmful[tiab] OR harming[tiab] OR harms[tiab] OR hurt[tiab] OR hurting[tiab] OR hurts[tiab] OR impact[tiab] OR impacted[tiab] OR impacting[tiab] OR impacts[tiab] OR maltreatment[tiab] OR mistreat[tiab] OR mistreated[tiab] OR mistreating[tiab] OR mistreatment[tiab] OR mistreats[tiab] OR neglect[tiab] OR neglected[tiab] OR neglecting[tiab] OR neglects[tiab] OR problem[tiab] OR problems[tiab] OR risk[tiab] OR risked[tiab] OR risking[tiab] OR risks[tiab] OR risktaking[tiab]

#5 Search #1 AND #2 AND #3 AND #4

#6 Search editorial[pt] OR comment[pt] OR letter[pt] OR newspaper article[pt]

#7 Search #5 NOT #6

#8 Search #7 AND *Systematic review filter*: Publication date from 2007/01/01 to 2017/12/31; English

#9 Search #7 AND *Randomized controlled trial filter*: Publication date from 2007/01/01 to 2017/12/31; English

1  
2  
3  
4  
5  
6  
7  
8  
9  
10  
11  
12  
13  
14  
15  
16  
17  
18  
19  
20  
21  
22  
23  
24  
25  
26  
27  
28  
29  
30  
31  
32  
33  
34  
35  
36  
37  
38  
39  
40  
41  
42  
43  
44  
45  
46  
47  
48  
49  
50  
51  
52  
53  
54  
55  
56  
57  
58  
59  
60

#10 Search #7 AND *Observational studies filter*. Publication date from 2007/01/01 to 2017/12/31; English

For peer review only

**Depression Research Priority #: 9**

**Priority:** What interventions are effective in supporting employees with depression and reducing stigma associated with depression in the workplace?

**Suggested question (reviewer generated):** What interventions are effective in supporting employees with depression and reducing stigma associated with depression in the workplace?

**Date conducted:** 12 October 2017

**Database:** PubMed via NCBI Entrez (1946- )

**Records Retrieved:** 1571

**Strategy:**

#1 Search "Bipolar and Related Disorders"[Mesh] OR "Depression"[Mesh] OR "Depressive Disorder"[Mesh] OR "Mood Disorders"[Mesh:NoExp] OR affective disorder[tiab] OR affective disorders[tiab] OR bipolar[tiab] OR depression[tiab] OR depressive[tiab] OR depressives[tiab] OR manic disorder[tiab] OR manic disorders[tiab] OR mood disorder[tiab] OR mood disorders[tiab]

#2 Search ("Occupational Health"[Majr] OR "Workplace"[Mesh] OR employee[tiab] OR employees[tiab] OR employer[tiab] OR employers[tiab] OR job site[tiab] OR job sites[tiab] OR occupational health[ti] OR staff[tiab] OR worker[tiab] OR workers[tiab] OR work place[tiab] OR work places[tiab] OR workplace[tiab] OR workplaces[tiab]) AND ("Health Education"[Mesh:NoExp] OR "Health Policy"[Mesh] OR "Health Promotion"[Mesh] OR "Occupational Health Services"[Mesh] OR "Program Evaluation"[Mesh] OR "Sensitivity Training Groups"[Mesh] OR "Social Stigma"[Mesh] OR "Staff Development"[Mesh] OR course[tiab] OR courses[tiab] OR education[tiab] OR educational[tiab] OR intervention[tiab] OR interventions[tiab] OR policies[tiab] OR policy[tiab] OR program[tiab] OR programme[tiab] OR programmes[tiab] OR programming[tiab] OR programs[tiab] OR stigma[tiab] OR stigmatized[tiab] OR training[tiab])

#3 Search #1 AND #2

#4 Search editorial[pt] OR comment[pt] OR letter[pt] OR newspaper article[pt]

#5 Search #3 NOT #4

#6 Search #5 AND *Systematic review filter*: Publication date from 2007/01/01 to 2017/12/31; English

#7 Search #5 AND *Randomized controlled trial filter*: Publication date from 2007/01/01 to 2017/12/31; English

#8 Search #5 AND *Observational studies filter*: Publication date from 2007/01/01 to 2017/12/31; English

**Depression Research Priority #: 10**

**Priority:** Are there structural or functional changes in brains due to antidepressant therapy during brain development?

**Suggested question (reviewer generated):** Does antidepressant therapy result in neurodevelopmental delays or neurological harms in children and adolescents?

**Date conducted:** 4 July 2017

**Database:** PubMed via NCBI Entrez (1946- )

**Records Retrieved:** 731

**Strategy:**

#1 Search ("Antidepressive Agents/adverse effects"[Mesh] OR "Antidepressive Agents/contraindications"[Mesh] OR "Antidepressive Agents/poisoning"[Mesh] OR "Antidepressive Agents/toxicity"[Mesh] OR "Serotonin Syndrome"[Mesh] OR "Serotonin Uptake Inhibitors/adverse effects"[Mesh] OR "Serotonin Uptake Inhibitors/contraindications"[Mesh] OR "Serotonin Uptake Inhibitors/poisoning"[Mesh] OR "Serotonin Uptake Inhibitors/toxicity"[Mesh]) OR (("Antidepressive Agents"[Mesh] OR "Serotonin Uptake Inhibitors"[Mesh] OR anti-depressant\*[tiab] OR antidepressant\*[tiab] antidepressant agent\*[tiab] OR serotonin reuptake inhibitor\*[tiab] OR SSRI\*[tiab]) AND ("Abnormalities, Drug-Induced"[MeSH] OR "Drug Recalls"[MeSH] OR "Drug-Related Side Effects and Adverse Reactions"[MeSH:noexp] OR "Product Surveillance, Postmarketing"[MeSH] OR "Psychoses, Substance-Induced"[MeSH:noexp] OR "Safety-Based Drug Withdrawals"[MeSH] OR adverse[ti] OR ((adverse[tiab] OR harm[tiab] OR harmed[tiab] OR harmful[tiab] OR harms[tiab] OR injurious[tiab] OR serious[tiab] OR toxic[tiab] OR undesirable[tiab]) AND (effect\*[tiab] OR event\*[tiab] OR outcome\*[tiab] OR incident\*[tiab] OR reaction\*[tiab])) OR adversely[ti] OR chemically induced[tiab] OR complication\*[ti] OR drug induced[tiab] OR harm[ti] OR harms[ti] OR injurious[ti] OR poison\*[ti] OR reaction\*[ti] OR recall\*[ti] OR risk[ti] OR risks[ti] OR safe[ti] OR safety[tiab] OR side effect\*[tiab] OR toxic[tiab] OR toxicit\*[tiab] OR toxicologic\*[tiab] OR undesirable[ti] OR unsafe[tiab] OR warning\*[ti] OR withdrawal\*[ti] OR withdrawn\*[ti]))

#2 Search ("Adolescent Development"[Mesh] OR "Child Development"[Mesh] OR "Neurodevelopmental Disorders"[Mesh] OR "Neurodevelopmental Disorders "[Mesh] OR autism[tiab] OR autistic[tiab] OR ASD[tiab] OR brain[tiab] OR cognitive[tiab] OR delay[tiab] OR delays[tiab] OR develop[tiab] OR developed[tiab] OR developing[tiab] OR development[tiab] OR developmental[tiab] OR disabilities[tiab] OR disability[tiab] OR disorder[tiab] OR disorders[tiab] OR grow[tiab] OR growth[tiab] OR impair[tiab] OR impaired[tiab] OR impede[tiab] OR impeded[tiab] OR impedes[tiab] OR intellectual[tiab] OR intellectually[tiab] OR learn[tiab] OR learns[tiab] OR learning[tiab] OR mental[tiab] OR mentally[tiab] OR neurodevelopmental[tiab] OR neurological[tiab])

#3 Search "Adolescent"[Mesh] OR "Child"[Mesh] OR "Minors"[Mesh] OR adolescence[tiab] OR adolescent[tiab] OR adolescents[tiab] OR child[tiab] OR childhood[tiab] OR children[tiab] OR childrens[tiab] OR childs[tiab] OR preschooler[tiab] OR preschoolers[tiab] OR teen[tiab] OR teenaged[tiab] OR teenager[tiab] OR teenagers[tiab] OR teens[tiab] OR toddler[tiab] OR toddlers[tiab] OR youth[tiab] OR youths[tiab]

#4 Search #1 AND #2 AND #3

#5 Search ("Maternal Exposure"[Mesh] OR Pregnancy[Majr] OR "Prenatal Injuries"[Mesh] OR antenatal[ti] OR embryo[ti] OR embryos[ti] OR embryonic[ti] OR fetal[ti] OR fetus[ti] OR



1  
2  
3 fetuses[ti] OR gestational[ti] OR maternal[ti] OR pregnancies[ti] OR pregnancy[ti] OR  
4 pregnant[ti] OR prenatal[ti] OR prenataally[ti] OR utero[ti])  
5

6 #6 Search #4 NOT #5: Publication date from 2007/01/01 to 2017/12/31; English  
7  
8  
9  
10  
11  
12  
13  
14  
15  
16  
17  
18  
19  
20  
21  
22  
23  
24  
25  
26  
27  
28  
29  
30  
31  
32  
33  
34  
35  
36  
37  
38  
39  
40  
41  
42  
43  
44  
45  
46  
47  
48  
49  
50  
51  
52  
53  
54  
55  
56

For peer review only

**Depression Research Priority #: 11****Priority:** What is the role of the family in the treatment and trajectory of depression?**Suggested question (reviewer generated):** For patients with diagnosed depression, does family involvement in patients' lives decrease the progression or severity of depression symptoms, influence treatment decisions, or impact remission rates?**Date conducted:** 2 October 2017**Database:** PubMed via NCBI Entrez (1946- )**Records Retrieved:** 4689**Strategy:**

#1 Search "Bipolar and Related Disorders"[Mesh] OR "Depression"[Mesh] OR "Depressive Disorder"[Mesh] OR "Mood Disorders"[Mesh:NoExp] OR affective disorder[tiab] OR affective disorders[tiab] OR bipolar[tiab] OR depression[tiab] OR depressive[tiab] OR depressives[tiab] OR manic disorder[tiab] OR manic disorders[tiab] OR mood disorder[tiab] OR mood disorders[tiab]

#2 Search ("Family"[Majr] OR (children[ti] AND (families[tiab] OR family[tiab] OR father[tiab] OR fathers[tiab] OR mother[tiab] OR mothers[tiab] OR parent[tiab] OR parents[tiab])) OR familial[ti] OR families[ti] OR family[ti] OR fathers[ti] OR grandparent[ti] OR grandparents[ti] OR kin[ti] OR kinship[ti] OR maternal[ti] OR mothers[ti] OR offspring[ti] OR parent[ti] OR parental[ti] OR parents[ti] OR paternal[ti] OR sibling[ti] OR siblings[ti] OR spousal[ti] OR spouse[ti] OR spouses[ti])

#3 Search ("Convalescence"[Mesh] OR "Decision Making"[Mesh] OR "Disease Progression"[Mesh] OR "Disease-Free Survival"[Mesh] OR "Health Status Indicators"[Mesh] OR "Patient Participation"[Mesh] OR "Recovery of Function"[Mesh] OR "Remission Induction"[Mesh:NoExp] OR "Treatment Outcome"[Mesh] OR decide[tiab] OR decided[tiab] OR decides[tiab] OR decision[tiab] OR decisions[tiab] OR engage[tiab] OR engaged[tiab] OR engagement[tiab] OR engaging[tiab] OR involve[tiab] OR involved[tiab] OR involvement[tiab] OR involves[tiab] OR involving[tiab] OR ((outcome[tiab] OR outcomes[tiab]) AND (patient[tiab] OR patients[tiab] OR therapeutic[tiab] OR therapy[tiab] OR therapies[tiab] OR treatment[tiab])) OR participate[tiab] OR participates[tiab] OR participation[tiab] OR progress[tiab] OR progression[tiab] OR recover[tiab] OR recovers[tiab] OR recovered[tiab] OR recovery[tiab] OR remission[tiab] OR severe[tiab] OR severity[tiab] OR (successful[tiab] AND (therapy[tiab] OR therapies[tiab] OR treatment[tiab] OR treatments[tiab])) OR symptom[tiab] OR symptoms[tiab])

#4 Search #1 AND #2 AND #3

#5 Search editorial[pt] OR comment[pt] OR letter[pt] OR newspaper article[pt]

#6 Search #4 NOT #5

#7 Search #6 AND *Systematic review filter*. Publication date from 2007/01/01 to 2017/12/31; English

#8 Search #6 AND *Randomized controlled trial filter*. Publication date from 2007/01/01 to 2017/12/31; English

#9 Search #8 AND *Observational studies filter*. Publication date from 2007/01/01 to 2017/12/31; English

15

1  
2  
3  
4  
5  
6  
7  
8  
9  
10  
11  
12  
13  
14  
15  
16  
17  
18  
19  
20  
21  
22  
23  
24  
25  
26  
27  
28  
29  
30  
31  
32  
33  
34  
35  
36  
37  
38  
39  
40  
41  
42  
43  
44  
45  
46  
47  
48  
49  
50  
51  
52  
53  
54  
55  
56  
57  
58  
59  
60

For peer review only

## APPENDIX 2. DESIGN, METHODS AND CONCLUSIONS OF THE INCLUDED REVIEWS<sup>a,b</sup>

<sup>a</sup>Presented in reverse chronological order, sorted by outcome or study design

<sup>b</sup>Limitations and conclusions as reported by the authors of each review

### Q1. Which treatment therapy or method for depression is more successful for long-term remission or recovery?

| Study and design                                                                          | Participants                                                                                           | Methods                                                                                                                                           | Limitations                                                                                                                                                                                  | Conclusions                                                                                                                                                                                                                |
|-------------------------------------------------------------------------------------------|--------------------------------------------------------------------------------------------------------|---------------------------------------------------------------------------------------------------------------------------------------------------|----------------------------------------------------------------------------------------------------------------------------------------------------------------------------------------------|----------------------------------------------------------------------------------------------------------------------------------------------------------------------------------------------------------------------------|
| <b>Inducing remission in patients with depression</b>                                     |                                                                                                        |                                                                                                                                                   |                                                                                                                                                                                              |                                                                                                                                                                                                                            |
| <b>Agency for Healthcare Research and Quality (AHRQ) comparative effectiveness review</b> |                                                                                                        |                                                                                                                                                   |                                                                                                                                                                                              |                                                                                                                                                                                                                            |
| Gartlehner 2015 SR and meta-analysis                                                      | n = 606 adults with depression undergoing first-step therapy, from 5 RCTs (follow up: 4 to 52 weeks).  | Meta-analysis of RCTs comparing the effects of SGAs and CBT or combination therapy (SGAs and CBT); included studies published up to January 2015. | Potential for publication bias and selective outcome reporting; few RCTs and small sample sizes; available evidence is mainly at high risk of bias; low strength of evidence.                | No significant difference in rates of remission between patients treated with SGAs or CBT (RR 0.98, 95% CI 0.73 to 1.32); adding CBT to SGA did not show any beneficial effect (RR 1.06, 95% CI 0.82 to 1.38).             |
| Gartlehner 2015 SR and meta-analysis                                                      | n = 174 adults with depression undergoing first-step therapy, from 2 RCTs (follow up: 8 to 24 weeks).  | Meta-analysis of RCTs comparing the effects of SGAs and IPT or combination therapy (SGAs and IPT); included studies published up to January 2015. | Potential for publication bias and selective outcome reporting; few RCTs and small sample sizes; available evidence is mainly at high risk of bias; low strength of evidence.                | No significant difference in rates of remission between patients treated with SGAs or IPT (RR 0.92, 95% CI 0.78 to 1.08). The combination of SGAs and IPT had 25% higher remission rates than SGAs alone (no pooled data). |
| Gartlehner 2015 SR and meta-analysis                                                      | n = 51 adults with depression undergoing first-step therapy, from 1 RCT (follow up: 8 weeks).          | Meta-analysis of RCTs comparing the effects of SGAs and PSYD; included studies published up to January 2015.                                      | Potential for publication bias and selective outcome reporting; only one available RCT; low strength of evidence.                                                                            | No significant difference in rates of remission between patients treated with SGAs or short-term (2 to 4 months) PSYD (RR 1.04, 95% CI 0.58 to 1.86).                                                                      |
| Gartlehner 2015 SR and meta-analysis                                                      | n = 243 adults with depression undergoing first-step therapy, from 2 RCTs (follow up: 16 to 49 weeks). | Meta-analysis of RCTs comparing the effects of SGAs and third-wave CBT; included studies published up to January 2015.                            | Potential for publication bias and selective outcome reporting; few RCTs and small sample sizes; available evidence is mainly at high risk of bias; inadequate evidence to draw conclusions. | There was insufficient evidence to draw conclusions about rates of remission for patients treated with SGAs compared to third-wave CBT (RR 0.57, 95% CI 0.44 to 0.74).                                                     |
| Gartlehner 2015 SR                                                                        | n = 122 adults with depression undergoing second-step therapy, from 1 RCT (follow up: 14 weeks).       | Systematic review of RCTs comparing the effects of switching from a SGA to a new SGA or to CT; included studies published up to January 2015.     | Potential for publication bias and selective outcome reporting; only one available RCT; low strength of evidence.                                                                            | No significant difference in rates of remission between patients who switched to a new SGA compared to CT (27.9 vs. 25.0%, P = 0.69).                                                                                      |

| Study and design                  | Participants                                                                                                               | Methods                                                                                                                                               | Limitations                                                                                                       | Conclusions                                                                                                                                                         |
|-----------------------------------|----------------------------------------------------------------------------------------------------------------------------|-------------------------------------------------------------------------------------------------------------------------------------------------------|-------------------------------------------------------------------------------------------------------------------|---------------------------------------------------------------------------------------------------------------------------------------------------------------------|
| Gartlehner 2015 SR                | n = 182 adults with depression undergoing second-step therapy, from 1 RCT (follow up: 14 weeks).                           | Systematic review of RCTs comparing the effects of augmenting SGA therapy with another SGA or with CT; included studies published up to January 2015. | Potential for publication bias and selective outcome reporting; only one available RCT; low strength of evidence. | No significant difference in rates of remission between patients whose SGA treatment was augmented with another SGA compared to with CT (33.3 vs. 23.1%, P = 0.20). |
| <b>Cochrane systematic review</b> |                                                                                                                            |                                                                                                                                                       |                                                                                                                   |                                                                                                                                                                     |
| Cox 2014 SR and meta-analysis     | n = 48 adolescents (12 to 18 years) with depression without co-morbid conditions, from 1 RCT (follow up: 6 months).        | Meta-analysis of RCTs comparing the effects of CBT and SSRIs; included RCTs published up to June 2014.                                                | Only one included RCT with a small sample size; included study was at high risk of bias.                          | It was not possible to draw robust conclusions, nor to establish whether SSRIs or CBT was most effective (OR 0.83, 95% CI 0.27 to 2.60).                            |
| Cox 2014 SR and meta-analysis     | n = 203 adolescents (12 to 18 years) with depression without co-morbid conditions, from 2 RCTs (follow up: 6 to 9 months). | Meta-analysis of RCTs comparing the effects of SSRIs and combination therapy (CBT and SSRIs); included RCTs published up to June 2014.                | Only two included RCTs with small sample sizes; included studies were at high risk of bias.                       | It was not possible to draw robust conclusions, nor to establish whether SSRIs or combination therapy was most effective (OR 1.93, 95% CI 0.93 to 4.00).            |
| Cox 2014 SR and meta-analysis     | n = 152 adolescents (12 to 18 years) with depression without co-morbid conditions, from 1 RCT (follow up: 12 months).      | Meta-analysis of RCTs comparing the effects of SSRIs and combination therapy (CBT and SSRIs); included RCTs published up to June 2014.                | Only one included RCT with a small sample size; included study was at high risk of bias.                          | It was not possible to draw robust conclusions, nor to establish whether SSRIs or combination therapy was most effective (OR 0.49, 95% CI 0.14 to 1.69).            |
| Cox 2014 SR and meta-analysis     | n = 47 adolescents (12 to 18 years) with depression without co-morbid conditions, from 1 RCT (follow up: 6 months).        | Meta-analysis of RCTs comparing the effects of CBT and combination therapy (CBT and SSRIs); included RCTs published up to June 2014.                  | Only one included RCT with a small sample size; included study was at high risk of bias.                          | It was not possible to draw robust conclusions, nor to establish whether CBT or combination therapy was most effective (OR 2.55, 95% CI 0.78 to 8.36).              |
| Cox 2014 SR and meta-analysis     | n = 56 adolescents (13 to 19 years) with depression without co-morbid conditions, from 1 RCT (follow up: 12 months).       | Meta-analysis of RCTs comparing the effects of combination therapy (CBT and SSRIs) and CBT plus placebo; included RCTs published up to June 2014.     | Only one included RCT with a small sample size; included study was at high risk of bias.                          | It was not possible to draw robust conclusions, nor to establish whether combination therapy or CBT plus placebo was most effective (OR 1.20, 95% CI 0.29 to 5.02). |
| <b>Other reviews</b>              |                                                                                                                            |                                                                                                                                                       |                                                                                                                   |                                                                                                                                                                     |

| Study and design                                                    | Participants                                                                                                    | Methods                                                                                                                                                            | Limitations                                                                                                                                                                                                                                                              | Conclusions                                                                                                                                                                                                                                        |
|---------------------------------------------------------------------|-----------------------------------------------------------------------------------------------------------------|--------------------------------------------------------------------------------------------------------------------------------------------------------------------|--------------------------------------------------------------------------------------------------------------------------------------------------------------------------------------------------------------------------------------------------------------------------|----------------------------------------------------------------------------------------------------------------------------------------------------------------------------------------------------------------------------------------------------|
| Farah 2016<br>Umbrella SR                                           | n = 7,455 adults with depression, from 69 RCTs located in 7 SRs (follow up: not reported).                      | Umbrella review of RCTs comparing the effects of ADM and alternative therapies; included RCTs were identified from SRs published up to February 2016.              | Results are restricted to the reporting quality and rigour of existing SRs; risk of bias in included studies; between-study heterogeneity in interventions, patients, measurement scales, and follow up length; publication bias.                                        | No significant difference in remission rate between CBT and ADM (RR 0.94, 95% CI 0.81 to 1.09), interpersonal therapy (RR 1.03, 95% CI 0.78 to 1.37), or psychotherapy (RR 0.99 95% CI 0.30 to 10.12).                                             |
| Weitz 2015<br>Independent patient data meta-analysis                | n = 1,700 adults with depression (all outpatients), from 16 RCTs (follow up: 8 to 20 weeks).                    | Independent patient data meta-analysis comparing the effects of ADM and CBT; patient data were retrieved from RCTs published up to January 2014.                   | Outcome measurement scales are prone to bias and have psychometric flaws; included studies may not be representative; quality of some included studies was sub-optimal; inpatients were excluded.                                                                        | No significant difference in remission between patients treated with ADM or CBT (OR 1.18, P = 0.22); no significant difference in remission between treatments as a function of depression severity (OR 1.00, P = 0.93).                           |
| Trivedi 2009<br>SR                                                  | n = 467 adults with treatment-resistant depression, from 12 publications of 5 RCTs (follow up: 8 to 104 weeks). | Systematic review of RCTs comparing the effects of psychotherapy (DBT or CT) and ADM continuation, augmentation, or switch; included studies published up to 2009. | Most studies were underpowered to detect moderately large treatment effects; between-study heterogeneity in study designs and patient populations; limited number of good trials.                                                                                        | Evidence examining the effect of psychotherapy as augmentation or substitute therapy in resistant depression is sparse and reveals mixed results. Psychotherapy appears to be an equally effective treatment compared to ADM.                      |
| de Maat 2007<br>SR and meta-analysis                                | n = 903 adults with depression (all outpatients), from 7 RCTs (follow up: 8 to 20 weeks).                       | Meta-analysis of RCTs comparing the effects of psychotherapy and combination therapy (psychotherapy and ADM); included studies published up to 2005.               | Analysis included few studies of mixed methodological quality; some studies had small sample sizes, limiting statistical power; evidence for chronic depression is limited to 1 RCT; between-study heterogeneity in treatments; study-level biases in patient selection. | Remissions rates were significantly higher for patients treated with combined therapy compared to psychotherapy alone (OR 1.59, 95% CI 1.22 to 2.09). The superiority of combined therapy was not demonstrated for non-chronic or mild depression. |
| <b>Preventing relapse for patients in remission from depression</b> |                                                                                                                 |                                                                                                                                                                    |                                                                                                                                                                                                                                                                          |                                                                                                                                                                                                                                                    |
| <b>Cochrane systematic review</b>                                   |                                                                                                                 |                                                                                                                                                                    |                                                                                                                                                                                                                                                                          |                                                                                                                                                                                                                                                    |
| Cox 2012<br>SR and meta-analysis                                    | n = 46 children or adolescents (11 to 18 years) in remission from depression, from 1 RCT (follow up: 24 weeks). | Meta-analysis of RCTs comparing the effects of SSRIs and combination therapy (SSRIs and CBT); included RCTs published up to June 2011.                             | Only one included RCT with a small sample size; included study was at high risk of bias.                                                                                                                                                                                 | There was a greater rate of relapse in patients who received ADM alone compared to combination therapy, but the difference was not statistically significant (OR 0.26, 95% CI 0.05 to 1.15).                                                       |
| <b>Other reviews</b>                                                |                                                                                                                 |                                                                                                                                                                    |                                                                                                                                                                                                                                                                          |                                                                                                                                                                                                                                                    |

| Study and design                               | Participants                                                                                                 | Methods                                                                                                                                                                | Limitations                                                                                                                                                                                                                         | Conclusions                                                                                                                                                                                                                                                                                                                               |
|------------------------------------------------|--------------------------------------------------------------------------------------------------------------|------------------------------------------------------------------------------------------------------------------------------------------------------------------------|-------------------------------------------------------------------------------------------------------------------------------------------------------------------------------------------------------------------------------------|-------------------------------------------------------------------------------------------------------------------------------------------------------------------------------------------------------------------------------------------------------------------------------------------------------------------------------------------|
| Biesheuvel-Leliefeld 2015 SR and meta-analysis | n = 914 adults aged 18 to 64 years in remission from depression, from 13 RCTs (average follow up: 90 weeks). | Meta-analysis of RCTs comparing the effects of ADM and psychological interventions (CBT, MBCT, or IPT); included RCTs published up to May 2014.                        | Low quality of evidence from the included studies; between-study heterogeneity in definitions (relapse, recovery, remission, and recurrence), type and duration of interventions.                                                   | The risk for relapse was significantly less for patients treated with ADM compared to those treated with psychological interventions (RR 0.83, 95% CI 0.70 to 0.97).                                                                                                                                                                      |
| Guidi 2011 SR and meta-analysis                | n = 875 adult patients in remission from depression, from 8 RCTs (follow up: 28 weeks to 6 years).           | Meta-analysis of RCTs comparing the effects of psychotherapy and continuation of ADM following remission from depression; included RCTs published up to December 2008. | Sample sizes and number of studies were too small for definitive conclusions to be drawn; between-study heterogeneity in length of follow up and duration of treatments, and in control conditions.                                 | The sequential administration of psychotherapy after response to acute-phase pharmacotherapy, either alone or in combination with ADM, may play a role in reducing relapse and recurrence (sequential psychotherapy with or without ADM, RR 0.80, 95% CI 0.66 to 0.96; psychotherapy + ADM discontinuation, RR 0.65, 95% CI 0.46 to 0.91) |
| Piet 2011 SR and meta-analysis                 | n = 177 adults in remission from recurrent depression, from 2 RCTs (follow up: 15 to 18 months).             | Meta-analysis of RCTs comparing the effects of MBCT and ADM; included RCTs published up to November 2010.                                                              | Only two included RCTs with small sample sizes.                                                                                                                                                                                     | Although more studies are needed for firm conclusions, results from two studies suggest that MBCT is at least comparable to maintenance ADM for effective relapse prevention of recurrent depression (RR 0.80, 95% CI 0.60 to 1.08).                                                                                                      |
| Chiesa 2010 SR and meta-analysis               | n = 326 adults with depression, from 4 RCTs (follow up: up to 1 year).                                       | Meta-analysis of RCTs comparing the effects of MBCT, TAU (including ADM), and combination therapy (MBCT and TAU); included RCTs published up to July 2010.             | Low quality of some of the included studies; risk of bias in the included studies due to inability to blind the participants to treatment allocation and inadequate randomisation details; small samples sizes of included studies. | Augmentation of MBCT to TAU could result in significantly lower relapse or recurrence rates compared to TAU alone (including ADM) (OR 0.30, 95% CI 0.17 to 0.56); MBCT with gradual discontinuation of ADM was not significantly different from continuation ADM (OR 0.61, 95% CI 0.30 to 1.25; 1 RCT).                                   |

The reviews by Gartlehner (2015) and Cox (2014) reported on multiple comparisons, and we presented these in separate rows.

ADM: antidepressant medication; CBT: cognitive behavioural therapy; CT: cognitive therapy; DBT: dialectical behaviour therapy; IPT: interpersonal psychotherapy; MBCT: mindfulness-based cognitive therapy; PSYD: psychodynamic therapy; RCT: randomised controlled trial; SGA: second-generation antidepressant; SR: systematic review; SSRI: selective serotonin reuptake inhibitor; TAU: treatment as usual



**Q2. What are the long-term physical implications of pharmacotherapy for treating depression?**

| Study and design                                  | Participants                                                                             | Methods                                                                                                                                                                | Limitations                                                                                                                                                         | Conclusions                                                                                                                                                                                                                                                                                                                   |
|---------------------------------------------------|------------------------------------------------------------------------------------------|------------------------------------------------------------------------------------------------------------------------------------------------------------------------|---------------------------------------------------------------------------------------------------------------------------------------------------------------------|-------------------------------------------------------------------------------------------------------------------------------------------------------------------------------------------------------------------------------------------------------------------------------------------------------------------------------|
| <b>Reviews: bone mineral density and fracture</b> |                                                                                          |                                                                                                                                                                        |                                                                                                                                                                     |                                                                                                                                                                                                                                                                                                                               |
| Gebara 2014<br>Systematic review                  | n = 92,056 older adults (>60 y) from 18 studies (19 articles), follow-up NR.             | Narrative synthesis of primary studies of older adults with a sample size $\geq 100$ that assessed the association between SSRI or SNRI use and bone mineral density.  | Inconsistency in the available data from primary studies; lack of controlling for confounders; no experimental studies found.                                       | There is little evidence to support causation between SSRI or SNRI use and a decrease in bone mineral density.                                                                                                                                                                                                                |
| Wu 2013<br>Systematic review                      | n = 313,748 adults from 13 studies with mean follow-up of 4.1 to 8.4 y (cohort studies). | Meta-analysis of case-control and cohort studies that assessed the association between SSRI use and bone mineral density and fracture risk published up to March 2011. | Some sources of heterogeneity could not be assessed; lack of controlling for confounders.                                                                           | Current use of SSRIs is associated with an increased risk of fractures which may be independent of depression and bone mineral density (RR: 1.45, 95% CI: 1.31-1.60). Subgroup analysis showed increased risk for current but not former users.                                                                               |
| Eom 2012<br>Systematic review                     | n = >906,446 adults from 12 studies with a follow-up of 1 to 13 y.                       | Meta-analysis of case-control and cohort studies that assessed the association between SSRI use and incident bone fractures published up to October 2010.              | Lack of information regarding potential confounding variables in the primary studies; all studies were from Western countries.                                      | Use of SSRIs to treat depression in the elderly may increase the odds of incident fracture (OR: 1.69, 95% CI: 1.51, 1.90). Subgroup analysis showed decreased strength of association with a longer window of administration before the index date.                                                                           |
| Wu 2012<br>Systematic review                      | n = 269,381 adults from 12 studies with mean follow-up of 4.1 to 10 y (cohort studies).  | Meta-analysis of case-control and cohort studies that assessed the association between TCA use and bone mineral density and fracture risk published up to August 2010. | Lack of information on falls; lack of controlling for confounders in the primary studies.                                                                           | The use of TCAs is associated with a moderate increased risk of incident fractures, which may be independent of depression and bone mineral density (RR: 1.72, 95% CI: 1.51-1.95).                                                                                                                                            |
| Wu 2010<br>Systematic review                      | n = 148,776 adults from 14 studies with mean follow-up of 1 to 22 y.                     | Meta-analysis of prospective cohort studies that assessed the effects of depression on risk of fracture or bone loss published up to July 2009.                        | Small number of studies with heterogeneity in outcomes and tools to measure depression; poor reporting; lack of controlling for confounders in the primary studies. | Depression is associated with an increased risk of incident fracture and bone loss, which may be mediated by antidepressant use; the HR for fracture was higher in studies that did not adjust for antidepressant use (HR: 1.30, 95% CI: 1.11-1.52, n = 14,777) vs. those that did (HR: 1.05; 95% CI: 0.86-1.29, n = 93,380). |
| <b>Reviews: diabetes</b>                          |                                                                                          |                                                                                                                                                                        |                                                                                                                                                                     |                                                                                                                                                                                                                                                                                                                               |
| Rotella 2013<br>Systematic review                 | n = 424,557 adults from 23 studies with a mean follow-up of 2.8 to 34 y.                 | Meta-analysis of case-control and cohort studies that assessed the difference in risk of incident diabetes between those with and without symptoms of depression.      | Heterogeneity in methods to diagnose depression and diabetes; heterogeneity in confounders included across primary studies.                                         | Both depression (OR: 1.56, 95% CI: 1.37-1.77) and use of ADMs (OR: 1.68, 95% CI: 1.17-2.40) among those with depression are associated with an increased odds of incident diabetes.                                                                                                                                           |
| <b>Reviews: physical diseases (general)</b>       |                                                                                          |                                                                                                                                                                        |                                                                                                                                                                     |                                                                                                                                                                                                                                                                                                                               |

|                                                           |                                                                                                          |                                                                                                                                                                                                                                   |                                                                                                                                                                                          |                                                                                                                                                                                                                                                                                                                                |
|-----------------------------------------------------------|----------------------------------------------------------------------------------------------------------|-----------------------------------------------------------------------------------------------------------------------------------------------------------------------------------------------------------------------------------|------------------------------------------------------------------------------------------------------------------------------------------------------------------------------------------|--------------------------------------------------------------------------------------------------------------------------------------------------------------------------------------------------------------------------------------------------------------------------------------------------------------------------------|
| Correll 2015<br>Review (non-systematic)                   | NR                                                                                                       | Narrative synthesis of studies that assessed the relationship between the use of antipsychotics, mood stabilizers, or ADMS and physical illness (both short- and long-term).                                                      | Review allows for little differentiation between studies of both short- and long-term adverse events; few details on included study characteristics provided.                            | There is some evidence to associate certain AMDs with mild to modest weight gain, incident diabetes, hypothyroidism (lithium), cardiovascular adverse events, sudden cardiac death, hepatotoxicity, nephrotoxicity, seizure disorders and fractures. There was no evidence of association with breast cancer.                  |
| <b>Observational studies: cardiovascular risk factors</b> |                                                                                                          |                                                                                                                                                                                                                                   |                                                                                                                                                                                          |                                                                                                                                                                                                                                                                                                                                |
| Perez-Pinar 2016<br>Retrospective cohort                  | n = 524,952 adults aged ≥30 years from 140 primary care practices in east London, UK.                    | Medical and prescription records were reviewed for a 10 year period (2005-2015) and Cox regression models were used to estimate associations between use ADMs before 2005 and cardiovascular risk factors over the next 10 years. | Results might be affected by confounding variables; lack of information on ADM compliance or dosage; dichotomisation of continuous outcomes led to loss of data.                         | An independent association was observed between ADM prescriptions and risk of incident type 2 diabetes (HRs from 1.28, 95% CI: 1.23-1.33 to 1.35, 95% CI: 1.04-1.15), hypertension (HRs from 1.09, 95% CI: 1.05-1.12 to 1.11, 95% CI: 1.07-1.14), and hyperlipidemia (HRs 1.05, 95% CI: 1.03-1.07 to 1.12, 95% CI: 1.10-1.14). |
| Rubin 2013<br>Prospective cohort embedded within a RCT    | n = 5,145 adults in the Look AHEAD weight loss RCT followed at 16 clinical centres in the US.            | Patients in the Look AHEAD trial assessed yearly over 4 y for ADM exposure and cardiovascular risk factors; the relationship between ADM use in the past year and cardiovascular risk factors was assessed.                       | Observational design (cannot draw causal inferences); did not study a comprehensive array of cardiovascular risk factors; no information on dose or duration of treatment.               | Both depression symptoms and use of ADMs during the prior year were associated with current elevated cardiovascular risk factors including adverse blood cholesterol changes, serum triglycerides, diastolic blood pressure, and obesity (variable by treatment arm, but reasons were not assessed).                           |
| <b>Observational studies: hepatocellular carcinoma</b>    |                                                                                                          |                                                                                                                                                                                                                                   |                                                                                                                                                                                          |                                                                                                                                                                                                                                                                                                                                |
| Pocha 2014<br>Retrospective cohort                        | n = 109,736 adults with HCV who entered the US Veterans Affairs HCV Clinical Case Registry in 2000-2009. | Medical and prescription records were extracted from the US Veterans Affairs HCV Case Registry and Cox regression models were used to estimate associations between ADM use and incident hepatocellular carcinoma.                | All participants were veterans and most were male; cannot exclude association at larger doses; data on development of cirrhosis during the study period was not available (confounding). | The data from this large cohort of HCV patients does not support the hypothesis that SSRI exposure increases the risk of developing hepatocellular carcinoma for the highest observed average daily dose and for exposures between 6 and >30 months.                                                                           |

HCV: hepatitis C virus; HR: hazard ratio; NR: not reported; ns: not statistically significant; OR: odds ratio; RCT: randomised controlled trial; RR: risk ratio; SNRI: serotonin norepinephrine reuptake inhibitor; SSRI: selective serotonin reuptake inhibitor; TCA: tricyclic antidepressant; UK: United Kingdom; US: United States; y: years

**Q3a. For various non-pharmacological treatment options, what are the advantages in terms of cost?**

| Study and design                             | Participants                                                                                                        | Intervention (I) & comparator (C)                                                 | Methods                                                                                                                                                                                                      | Limitations                                                                                                                                                                                                                              | Conclusions                                                                                                                                                                                                                                                                                      |
|----------------------------------------------|---------------------------------------------------------------------------------------------------------------------|-----------------------------------------------------------------------------------|--------------------------------------------------------------------------------------------------------------------------------------------------------------------------------------------------------------|------------------------------------------------------------------------------------------------------------------------------------------------------------------------------------------------------------------------------------------|--------------------------------------------------------------------------------------------------------------------------------------------------------------------------------------------------------------------------------------------------------------------------------------------------|
| <b>Any psychotherapy</b>                     |                                                                                                                     |                                                                                   |                                                                                                                                                                                                              |                                                                                                                                                                                                                                          |                                                                                                                                                                                                                                                                                                  |
| <b>Systematic Reviews</b>                    |                                                                                                                     |                                                                                   |                                                                                                                                                                                                              |                                                                                                                                                                                                                                          |                                                                                                                                                                                                                                                                                                  |
| Karyotaki 2016 Systematic review             | n=477 individuals (age NR) from 3 RCTs with moderate or severe major depressive disorder.                           | I: any treatment<br>C: any other treatment or control                             | Review of RCTs on cost-effectiveness of any treatment vs. any other type of treatment (e.g., psychological, pharmacological, treatment as usual) for common mental disorders published up to December 2014 . | Heterogeneity across studies limited the development of robust conclusions; individual study results may not be generalizable to other countries.                                                                                        | There was no difference in QALY gains for CBT- or psychologist enhanced-PEP vs. PEP alone over 36 months; at a willingness-to-pay >USD 405/depression-free day, CBT-enhanced PEP was the most cost-effective. There was no difference in costs for SPD vs. SSFT over 12 months.                  |
| Bower 2011 Cochrane systematic review        | n=197 adults from one RCT diagnosed with depression or mixed depression and anxiety in the UK.                      | I: counselling<br>C: CBT                                                          | Review of RCTs of counselling vs. other psychological or pharmacological therapies for mental health in primary care, published up to May 2011.                                                              | Study was at high risk of bias due to lack of blinding of participants, personnel and outcome assessors.                                                                                                                                 | Cost effectiveness and minimization evaluation showed that at 4 and 12 months there was no difference in total costs across treatments.                                                                                                                                                          |
| <b>RCTs</b>                                  |                                                                                                                     |                                                                                   |                                                                                                                                                                                                              |                                                                                                                                                                                                                                          |                                                                                                                                                                                                                                                                                                  |
| Goodyer 2017 Multicentre superiority RCT     | n=465 adolescents with major depressive disorder from 15 CAMHS clinics in England.                                  | I <sub>1</sub> : CBT<br>I <sub>2</sub> : SPA<br>C: brief psychosocial therapy     | Comparison of cost-effectiveness based on the Child and Adolescent Service Use Schedule and EuroQol 5D questionnaire, with follow-up to 86 weeks (21 months).                                                | Reasons for type of pharmacotherapy, compliance and prescribing were not controlled; improvements could be a function of time; lack of no treatment control limits ability to infer that treatment was causally effective; missing data. | Intervention costs were lowest for CBT (mean (SD) £904.57 (607.25)) and highest for SPA (£1396.72 (1133.41)). The cost of health, social care and education services differed little between groups. There was no evidence for any difference in cost-effectiveness nor QALYs across treatments. |
| Egede 2017 Non-inferiority RCT               | n=241 elderly (>58 years) veterans with major depressive disorder from clinics in South Carolina and Virginia, USA. | Behavioural activation<br>I: BA via telemedicine<br>C: traditional BA (same-room) | Comparison of overall, in- and outpatient, and pharmacy cost data collected from VA Health Economics Center datasets for the 1998-2014 fiscal years (6 years).                                               | Limited generalisability to women and younger patients, or to other countries.                                                                                                                                                           | Overall, outpatient and pharmacy costs showed an increasing trend over time with minimal difference between groups. Telemedicine BA had a higher inpatient cost than same-room BA (~USD 2,750 vs. 1,500).                                                                                        |
| Richards 2016 Open-label non-inferiority RCT | n=221 adults with major depressive disorder from primary care services in Devon,                                    | I: BA via junior health worker<br>C: CBT via psychologists                        | Economic analysis using the Adult Service Use Schedule, the Health and Work Performance Questionnaire, and EuroQol-5D-3L, taking UK                                                                          | Attrition rates may have affected the results; 35% of participants did not attend even a minimal number of sessions; did not control for                                                                                                 | Intervention costs were higher for CBT than BA ((mean (SD) £1235.23 (610.03) vs. £974.81 (475.02), p<0.0001), but there were no differences in other or                                                                                                                                          |

| Study and design                      | Participants                                                                                                                                                                 | Intervention (I) & comparator (C)                                                          | Methods                                                                                                                                                                                                                                                          | Limitations                                                                                                                                                                                                                                                           | Conclusions                                                                                                                                                                                                                                                                                                                                                                         |
|---------------------------------------|------------------------------------------------------------------------------------------------------------------------------------------------------------------------------|--------------------------------------------------------------------------------------------|------------------------------------------------------------------------------------------------------------------------------------------------------------------------------------------------------------------------------------------------------------------|-----------------------------------------------------------------------------------------------------------------------------------------------------------------------------------------------------------------------------------------------------------------------|-------------------------------------------------------------------------------------------------------------------------------------------------------------------------------------------------------------------------------------------------------------------------------------------------------------------------------------------------------------------------------------|
|                                       | Durham, and Leeds, UK.                                                                                                                                                       |                                                                                            | National Health Services and personal social services perspectives with follow-up to 18 months.                                                                                                                                                                  | use of medications; trial was not blinded.                                                                                                                                                                                                                            | total costs. Mean health state utility scores and QALYs did not differ between groups. The incremental cost-effectiveness ratio was -£6865 for BA vs. CBT; BA was less costly and more effective.                                                                                                                                                                                   |
| Maljanen 2016 Non-inferiority RCT     | n=326 adult patients with a mood or anxiety disorder who were part of the Helsinki Psychotherapy Study from 1994-2000.                                                       | I <sub>1</sub> : Solution-focused therapy<br>I <sub>2</sub> : SPD<br>C: LPD                | Comparison of direct and indirect costs due to treatment of mental disorders and non-mental (somatic) disorders across treatment conditions using data from patient level registers or self-report questionnaires, with follow-up to 5 years.                    | Patient preferences and suitability for treatment were not considered; results might be confounded by the fact that patients in the short-term therapy groups spent more time in auxiliary therapies; may not be generalizable to older populations, other countries. | Mean direct costs were about three times higher for the LPD (€22,132) compared to the SPD (€7,387) and solution-focused groups (€8,434), mainly due to the higher cost of the sessions. Indirect costs due to mental health problems were also higher in the LPD vs. other groups. LPD was somewhat more effective than the shorter therapies.                                      |
| Warmerdam 2010 Three-armed RCT        | n=236 adults with depressive symptoms.                                                                                                                                       | I <sub>1</sub> : Internet CBT<br>I <sub>2</sub> : Internet PST<br>C: usual care            | Comparison of costs from a societal perspective for direct medical costs and indirect or direct nonmedical costs using data from the Trimbos/iMTA as well as self-report, with follow-up to 12 weeks.                                                            | High attrition; short follow-up; underpowered to detect significant differences between CBT and PST.                                                                                                                                                                  | Total costs between CBT and PST were not different. There was an incremental cost-effectiveness ratio of -36 for PST vs. CBT. There was no difference in cost-utility between groups. Sensitivity analyses showed a 72% probability that PST results in modestly better QALY gains at lower cost than CBT.                                                                          |
| Morrell 2009 RCT (cluster randomised) | n= 2,659 women (418 at-risk women) with postnatal depression who were part of registered general practitioners' practices in the former Trent Regional Health Authority, UK. | I <sub>1</sub> : CBT<br>I <sub>2</sub> : person-centered therapy approach<br>C: usual care | Economic evaluation following NICE guidelines, taking a social service perspective and using resource use data from the literature and general practitioner records, and prescription cost data from the British National Formulary, with follow-up to 6 months. | High attrition; potential cluster effects; statistical tests used may be prone to bias.                                                                                                                                                                               | For at-risk women the mean costs appeared lower for CBT than the person-centred approach. The number of QALYs gained did not differ. CBT had a higher probability of being cost-effective (>70%) than the person-centered approach in the range of QALY values between £20,000 and £30,000. For the full sample, there was very little difference in terms of cost or QALYs gained. |

| Study and design                     | Participants                                                                                                             | Intervention (I) & comparator (C)                                                                | Methods                                                                                                                                                                                                      | Limitations                                                                                                                                                | Conclusions                                                                                                                                                                                                                                                                                                                                                                          |
|--------------------------------------|--------------------------------------------------------------------------------------------------------------------------|--------------------------------------------------------------------------------------------------|--------------------------------------------------------------------------------------------------------------------------------------------------------------------------------------------------------------|------------------------------------------------------------------------------------------------------------------------------------------------------------|--------------------------------------------------------------------------------------------------------------------------------------------------------------------------------------------------------------------------------------------------------------------------------------------------------------------------------------------------------------------------------------|
| Dunn 2007                            | n=101 male veterans with chronic combat-related PTSD and depressive disorder from two outreach centres in Virginia, USA. | I: self-management therapy<br>C: PEP                                                             | Comparison of outpatient, hospitalisation, pharmacy, and other costs using data from the Virginia Health Economics Resource Centre and Pharmacy Benefits Management System, with follow up to 12 months.     | Not generalizable to other groups (all male veterans); many eligible individuals refused to participate (potentially biased sample).                       | Self-management therapy was only marginally more effective than PEP during treatment (effect disappeared during follow-up). Self-management participants had lower outpatient psychiatric (mean (SD) USD 3,534 (2,956) vs. 5,246 (4,094)) and medical/surgical costs (USD 3,597 (3,235) vs. 5,453 (4,611)) than the PEP group. The groups did not differ in health care utilization. |
| <b>Observational studies</b>         |                                                                                                                          |                                                                                                  |                                                                                                                                                                                                              |                                                                                                                                                            |                                                                                                                                                                                                                                                                                                                                                                                      |
| Berghout 2010<br>Quasi-experimental  | n=182 adult patients from four mental healthcare organisations in the Netherlands.                                       | I: psychoanalysis via mental health workers<br>C: psychoanalytic psychotherapy (lower intensity) | Cost-utility analysis including costs of resource use obtained from administrative records, and societal costs measured with the Trimbos/iMTA and Health and Labor questionnaire over the course of therapy. | Large amounts of missed data imputed; unassessed covariates (confounding); patients may not have been equivalent at baseline.                              | Psychoanalysis was more costly than psychoanalytic psychotherapy (€103,507 vs. 22,576) but also more effective from a health-related quality of life perspective. The incremental cost-effectiveness ratio for psychoanalysis was €52,384 per QALY gained as compared to psychoanalytic psychotherapy.                                                                               |
| <b>Cognitive behavioural therapy</b> |                                                                                                                          |                                                                                                  |                                                                                                                                                                                                              |                                                                                                                                                            |                                                                                                                                                                                                                                                                                                                                                                                      |
| <b>Reviews</b>                       |                                                                                                                          |                                                                                                  |                                                                                                                                                                                                              |                                                                                                                                                            |                                                                                                                                                                                                                                                                                                                                                                                      |
| Andersen 2016<br>Systematic review   | n=133 adults from 2 RCTs with an anxiety or depressive disorder.                                                         | I: transdiagnostic CBT<br>C: diagnosis-specific CBT or relaxation                                | Review of RCTs comparing CBT to any comparison condition in transdiagnostic studies published up to June 2013.                                                                                               | Lack of any available evidence to draw conclusions.                                                                                                        | The review intended to compare costs however no cost-effectiveness data was reported by any of the included studies.                                                                                                                                                                                                                                                                 |
| Boudreau 2010<br>CADTH rapid review  | NR; one study of individuals with depression in Australia.                                                               | I: self-directed CBT (bibliotherapy)<br>C: traditional CBT                                       | Review of RCTs and economic studies comparing self-directed CBT to traditional CBT for treatment of depression published up to January 2010.                                                                 | Generalisability limited to Australia or populations with similar funding structure; unclear how the economic model was constructed or patients recruited. | Bibliotherapy was the cheapest option for CBT, being cost-effective at A\$10,000 per DALY. Group and individual CBT provided by a psychologist on public salary were also considered cost-effective.                                                                                                                                                                                 |
| <b>RCTs</b>                          |                                                                                                                          |                                                                                                  |                                                                                                                                                                                                              |                                                                                                                                                            |                                                                                                                                                                                                                                                                                                                                                                                      |
| Romero-Sanchiz 2017                  | n=194 adults with depression from                                                                                        | Internet-based CBT<br>I: psychotherapist support                                                 | Economic analysis from a societal and healthcare perspective with follow-up at                                                                                                                               | Patient attrition may have limited the results; insufficient sample size for                                                                               | Internet-based CBT was more cost-effective than supported CBT (mean (SD) €1402.81 (429.64) vs.                                                                                                                                                                                                                                                                                       |

| Study and design                          | Participants                                                                                                                | Intervention (I) & comparator (C)                                                                 | Methods                                                                                                                                                                                                                                                                                                                 | Limitations                                                                                                                                                                                  | Conclusions                                                                                                                                                                                                                                                                                                                                                        |
|-------------------------------------------|-----------------------------------------------------------------------------------------------------------------------------|---------------------------------------------------------------------------------------------------|-------------------------------------------------------------------------------------------------------------------------------------------------------------------------------------------------------------------------------------------------------------------------------------------------------------------------|----------------------------------------------------------------------------------------------------------------------------------------------------------------------------------------------|--------------------------------------------------------------------------------------------------------------------------------------------------------------------------------------------------------------------------------------------------------------------------------------------------------------------------------------------------------------------|
| Multi-centre three-armed parallel RCT     | primary care centres in Spain.                                                                                              | I <sub>2</sub> : no psychotherapist support<br>C: usual care                                      | 12 months (based on publicly financed health care with universal coverage).                                                                                                                                                                                                                                             | subgroup analyses (e.g., by age or sex).                                                                                                                                                     | €1717.15 (509.49)). Supported CBT showed more efficacy and utility, but clinical results for unsupported CBT were almost as good while saving costs.                                                                                                                                                                                                               |
| Meuldijk 2015 RCT                         | n=182 adult patients with mild to moderate anxiety or depressive disorder at 5 Dutch outpatient Mental Healthcare Centres . | I: concise CBT (7 sessions/7 weeks)<br>C: standard CBT (unlimited sessions/1 year)                | Economic evaluation undertaken from a societal perspective using case records and the Trimbos/IMTA questionnaire for costs associated with psychiatric illness, with follow-up to 3, 6, and 12 months.                                                                                                                  | Small sample size and high attrition; study underpowered to detect cost differences; protocol deviations.                                                                                    | There was no difference in total direct healthcare and non-healthcare costs for concise vs. standard treatment. There was also no significant difference in QALYs by treatment type. The probability that concise care is more cost-effective than standard care remains below the turning point threshold of 0.5 for all acceptable values of willingness to pay. |
| Kafali 2014 Three-armed RCT               | n=171 adult Latino patients with depression from multiple clinics in Boston, Massachusetts and San Juan, Puerto Rico, USA.  | I <sub>1</sub> : telephone CBT<br>I <sub>2</sub> : face-to-face CBT<br>C: usual care              | Comparison of the cost-effectiveness in terms of mental health care costs (intervention and non-intervention) using prices from the 2010 Medical Expenditure Panel Survey, with follow up to 4 months.                                                                                                                  | Short follow-up period; insufficient information to compute QALYs; service use due to comorbidities not quantified.                                                                          | Telephone CBT was less costly in terms of mental health care costs by USD 501 compared to face-to-face CBT. For a one score reduction on the Patient Health Questionnaire, the cost of telephone CBT was USD 634 less than face-to-face CBT.                                                                                                                       |
| <b>Observational studies</b>              |                                                                                                                             |                                                                                                   |                                                                                                                                                                                                                                                                                                                         |                                                                                                                                                                                              |                                                                                                                                                                                                                                                                                                                                                                    |
| Solomon 2015 Mathematical modelling study | Used data from a RCT of n=720 community-based volunteers with mild-to-moderate depression in Australia.                     | I: Internet-based CBT<br>C <sub>1</sub> : face-to-face CBT<br>C <sub>2</sub> : treatment as usual | Examination of a stepped-care treatment model including Internet CBT as a first step, with cost analysis based on time spent in each health state (depression, remission, maintenance) and resource utilization from literature and administrative data, with a time horizon of 28 weeks and a public insurance scheme. | Model has several assumptions (e.g., delivery costs, discontinuation rate); several cost sources not included in the model (indirect costs, cost of adverse effects); short-term time frame. | Internet CBT had a higher net monetary benefit than face-to-face CBT (mean (SD) A\$12,474 (6,522-16,600) vs. A\$11,952 (5,159-16,255)). The incremental cost relative to Internet CBT was A\$1,995 per individual for face-to-face CBT. At a willingness to pay threshold of A\$50,000, there is a 75.5% probability that Internet CBT is cost effective.          |
| Hammond 2012 Quasi-experimental           | n=39,227 adults referred to psychological therapies in NE Herts,                                                            | Low-intensity CBT<br>I: over telephone<br>C: face-to-face                                         | Comparison of cost-per-session for each type of therapy for the financial year 2009/2010 using a cost-                                                                                                                                                                                                                  | Potential that findings are the result of natural resolution of symptoms; unassessed covariates (confounding);                                                                               | The per-session cost of telephone CBT was 36.2% lower than face-to-face CBT (mean (95% CI) £79.19 (55.0-103.3) vs. 118.76                                                                                                                                                                                                                                          |



1  
2  
3  
4  
5  
6  
7  
8  
9  
10  
11  
12  
13  
14  
15  
16  
17  
18  
19  
20  
21  
22  
23  
24  
25  
26  
27  
28  
29  
30  
31  
32  
33  
34  
35  
36  
37  
38  
39  
40  
41  
42  
43  
44  
45  
46  
47

| Study and design              | Participants                                                                                                                                      | Intervention (I) & comparator (C)  | Methods                                                                                                                                                                                | Limitations                                                                                                         | Conclusions                                                                                                                                                                                              |
|-------------------------------|---------------------------------------------------------------------------------------------------------------------------------------------------|------------------------------------|----------------------------------------------------------------------------------------------------------------------------------------------------------------------------------------|---------------------------------------------------------------------------------------------------------------------|----------------------------------------------------------------------------------------------------------------------------------------------------------------------------------------------------------|
|                               | NE Essex, Suffolk, W Herts, Mid Essex, Bedfordshire, and Cambridgeshire, UK.                                                                      |                                    | minimization approach based on treatment equivalence for each therapy.                                                                                                                 | some patients excluded since they received a mix of treatments.                                                     | (82.5-155.0)). The telephone treatment also appeared to be more effective in reducing depression scores.                                                                                                 |
| Brown 2011 Quasi-experimental | n=85 adults with a primary diagnosis of depression from five psychology services provided by a large mental health Trust in southeast London, UK. | I: group CBT<br>C: individual CBT. | Comparison of costs of providing each type of treatment, including staff time, non-staff costs, organisational overheads, and capital at 2006-2007 rates over the course of treatment. | Unassessed covariates (confounding); patients may have differed in terms of other diagnoses or depression severity. | Individual CBT was 1.5 times more costly to provide than group CBT (mean (SD) £375.32 (216) vs. 246.33 (108)), with no difference in effectiveness in terms of reduced depressive and distress symptoms. |

BA: behavioural activation; CADTH: Canadian Agency for Drugs and Technologies in Health; CAMHS: Child and Adolescent Mental Health Service (UK); CBT: cognitive behavioural therapy; DALY: disability-adjusted life-year; iMTA: Institute of Medical Technology Assessment; LPD: long-term psychodynamic therapy; NICE: National Institute for Health and Care Excellence; NR: not reported; PEP: psychoeducation program; PST: problem-solving therapy; PTSD: post-traumatic stress disorder; QALY: quality-adjusted life-years; RCT: randomised controlled trial; REBT: rational emotive behavioural therapy; SPA: short-term psychoanalytic therapy; SPD: short-term psychodynamic therapy; SSFT: short-term solution-focused therapy; SSRI: selective serotonin reuptake inhibitor; UK: United Kingdom; USA: United States of America



**Q3b. For various non-pharmacological treatment options, what are the advantages in terms of safety?**

| Study                               | Participants                                                                                                                                                                              | Methods                                                                                                                                                                                                                     | Limitations <sup>b</sup>                                                                                                                                                                                                    | Conclusions <sup>b</sup>                                                                                                                                                                   |
|-------------------------------------|-------------------------------------------------------------------------------------------------------------------------------------------------------------------------------------------|-----------------------------------------------------------------------------------------------------------------------------------------------------------------------------------------------------------------------------|-----------------------------------------------------------------------------------------------------------------------------------------------------------------------------------------------------------------------------|--------------------------------------------------------------------------------------------------------------------------------------------------------------------------------------------|
| <b>Reviews</b>                      |                                                                                                                                                                                           |                                                                                                                                                                                                                             |                                                                                                                                                                                                                             |                                                                                                                                                                                            |
| Gertler 2015                        | n = 77 adults who had sustained a TBI undergoing psychotherapy for depression, from 1 RCT (follow up: 3 months).                                                                          | Cochrane systematic review of RCTs comparing CBT and supportive psychotherapy for depression post-TBI. Included studies published up to February 2015.                                                                      | Only one included study. Study was at high risk of bias.                                                                                                                                                                    | No adverse events were reported.                                                                                                                                                           |
| Shinohara 2013                      | n = 955 adults undergoing psychotherapy for depression, from 25 RCTs and cross-over trials (follow up: up to 6 months).                                                                   | Cochrane systematic review of RCTs and cross-over trials comparing: BT and all other psychotherapies; BT and CBT; BT and psychodynamic therapies; BT and integrative therapies. Included studies published up to July 2013. | Most studies had a small sample size and were at unclear or high risk of bias.                                                                                                                                              | No study provided reports of adverse effects.                                                                                                                                              |
| <b>Randomised controlled trials</b> |                                                                                                                                                                                           |                                                                                                                                                                                                                             |                                                                                                                                                                                                                             |                                                                                                                                                                                            |
| Goodyer 2017                        | n = 470 adolescents (11 to 17 years) with depression recruited from NHS child and adolescent mental health service clinics, UK (follow up: 86 weeks).                                     | Randomised trial comparing brief psychosocial intervention (12 sessions over 20 weeks), CBT (20 sessions over 30 weeks), and short-term psychoanalytical therapy (28 sessions over 30 weeks).                               | 16% loss to follow up; some patients in all three groups received antidepressant medication (not controlled for); absence of a no-treatment control group.                                                                  | Physical adverse events (self-reported breathing problems, sleep disturbances, drowsiness or tiredness, nausea, sweating, and being restless or overactive) did not differ between groups. |
| Richards 2016                       | n = 221 adults with depression recruited from primary care and psychological therapy services in Devon, Durham, and Leeds, UK (follow up: 6, 12, and 18 months).                          | Randomised trial comparing BA and CBT (maximum of 20 60-minute sessions over 16 weeks, with the option of four additional booster sessions).                                                                                | High level of attrition (35%); did not control for the contribution of antidepressant medications; could not mask participants to treatment allocation.                                                                     | No adverse events related to the treatments were reported.                                                                                                                                 |
| Egede 2015                          | n = 780 veterans (≥58 years) with depression recruited from the Ralph H Johnson Veterans Affairs Medical Centre and four associated outpatient clinics in the USA (follow up: 12 months). | Randomised trial comparing BA provided for 60 minutes, once per week via telemedicine (in-home videoconferencing) and via same-room treatment.                                                                              | Excluded patients with acute safety concerns, substance dependence, and active psychosis or dementia; information technology used is now obsolete; included few women; some patients were taking antidepressant medication. | We did not note any adverse events.                                                                                                                                                        |

| Study           | Participants                                                                                                                                                                                     | Methods                                                                                                                                                                                                        | Limitations <sup>b</sup>                                                                                                           | Conclusions <sup>b</sup>                                                                                                                                                                                                                                                                                                                                                  |
|-----------------|--------------------------------------------------------------------------------------------------------------------------------------------------------------------------------------------------|----------------------------------------------------------------------------------------------------------------------------------------------------------------------------------------------------------------|------------------------------------------------------------------------------------------------------------------------------------|---------------------------------------------------------------------------------------------------------------------------------------------------------------------------------------------------------------------------------------------------------------------------------------------------------------------------------------------------------------------------|
| Berking 2013    | n = 432 adult inpatients with depression from a routine mental health care hospital in Germany (mean follow up: 46 days).                                                                        | Randomised trial comparing CBT (1.5 hours per week, plus four 45-minute sessions of transdiagnostic group therapy) and CBT-ERT (four 1.5-hour and two 45-minute ERT sessions replaced 10 of the CBT sessions). | Follow up only post-treatment; participants also received sports therapy and occupational therapy; no data on treatment integrity. | No adverse events were reported.                                                                                                                                                                                                                                                                                                                                          |
| Himmelhoch 2013 | n = 34 low-income, urban dwelling, HIV infected adults with depression recruited from two HIV clinics in the USA (follow up: 14 weeks).                                                          | Randomised trial comparing telephone-based CBT (11 45-minute sessions over 14 weeks) and face-to-face CBT (11 60-minute sessions over 14 weeks).                                                               | Short length of treatment and follow up; small sample size.                                                                        | None of the participants discontinued treatment due to adverse events.                                                                                                                                                                                                                                                                                                    |
| Merry 2012      | n = 187 adolescents (12 to 19 years) who sought help for depression, recruited from youth clinics, general practices, and school-based counseling services in New Zealand (follow up: 3 months). | Randomised trial comparing computerised CBT via interactive fantasy game (7 modules over 4 to 7 weeks) and face-to-face counseling.                                                                            | Small sample sizes for some subgroup analyses.                                                                                     | One participant in the computerised CBT group and two in the face-to-face group experience mild adverse events, and eight in each group experienced moderately severe adverse events (e.g., worsening of mood, suicidal thinking); two participants in the computerised CBT group and one in the face-to-face group experienced suicide attempts (serious adverse event). |

BA = behavioural activation; CBT = cognitive behavioural therapy; ERT = emotion regulation skills training; HIV: human immunodeficiency virus; NHS = National Health Service; RCT = randomised controlled trial; TBI = traumatic brain injury; UK = United Kingdom; USA = United States of America

**Q3c. For various non-pharmacological treatment options, what are the advantages in terms of effectiveness and relapse prevention?**

| Study                           | Participants                                                                                                                                                                        | Methods                                                                                                                                                                                                                                           | Limitations                                                                                                                    | Conclusions                                                                                                                                                                                                                                                                                                                                                                                                                                                                                                                                                                                                                                                                                                                                                                                                                                                    |
|---------------------------------|-------------------------------------------------------------------------------------------------------------------------------------------------------------------------------------|---------------------------------------------------------------------------------------------------------------------------------------------------------------------------------------------------------------------------------------------------|--------------------------------------------------------------------------------------------------------------------------------|----------------------------------------------------------------------------------------------------------------------------------------------------------------------------------------------------------------------------------------------------------------------------------------------------------------------------------------------------------------------------------------------------------------------------------------------------------------------------------------------------------------------------------------------------------------------------------------------------------------------------------------------------------------------------------------------------------------------------------------------------------------------------------------------------------------------------------------------------------------|
| <b>Children and adolescents</b> |                                                                                                                                                                                     |                                                                                                                                                                                                                                                   |                                                                                                                                |                                                                                                                                                                                                                                                                                                                                                                                                                                                                                                                                                                                                                                                                                                                                                                                                                                                                |
| Zhou 2015                       | n = 2,361 children and adolescents with a diagnosis of major or minor depression, intermittent depression, or dysthymia; short- (1-6 months) and long-term (6-12 months) follow-up. | Network meta-analysis of 52 RCTs including 9 psychotherapy conditions to test their comparative efficacy (CBT, IPT, supportive, cognitive, family, play, behavioural, problem-solving, and psychodynamic therapies), published from 1980 to 2013. | Heterogeneity in treatments included in some nodes of the analysis; exclusion of treatment-resistant and psychotic depression. | For efficacy at post-treatment, IPT (SMD = -0.93, 95% CI = -1.66 to -0.20) and CBT (SMD = -0.80, 95% CI = -1.55 to -0.06) were more beneficial than play therapy. At short-term follow-up, IPT was more effective than problem-solving therapy (SMD = -0.99); CBT was more effective than cognitive therapy and problem-solving therapy (data NR). At long-term follow-up, IPT was more beneficial than CBT and cognitive therapy (data NR). Overall, at follow-up IPT (SMD = -1.10, 95% CI = -1.90 to -0.27) and CBT (SMD = -0.90, 95% CI = -1.56 to -0.3) were more beneficial than problem-solving therapy. Thus, IPT and CBT should be the initial choice of treatment.                                                                                                                                                                                    |
| Hazell 2009                     | n = NR children and adolescents with depression; follow-up variable across comparisons; follow-up to 24 months.                                                                     | 'Clinical evidence review' of SRs, RCTs and observational studies comparative effects of various psychotherapies (CBT, IPT), published up to April 2008.                                                                                          | Low quality evidence.                                                                                                          | One SR found no difference between IPT and CBT in remission rates or depressive symptoms at the end of treatment. Compared with family therapy, individual CBT may be more effective at increasing remission rates but not at improving self-rated depressive symptoms (1 SR). Compared to supportive therapy, CBT may be more effective at increasing remission rates at the end of treatment but not at maintaining remission at 9 or 24 months or at improving self-rated symptoms (1 SR). In 1 RCT there was no difference in effectiveness between group therapeutic support and social skills training. There was no evidence for difference in effectiveness of family therapy vs. supportive therapy or psychodynamic therapy. There was no difference between CBT and non-directive supportive therapy in maintenance of remission at 9 or 24 months. |
| Spielmanns 2007                 | n = NR children and adolescents ( $\leq 18$ years) suffering from symptoms of anxiety or depression; follow-up NR.                                                                  | Meta-analysis of RCTs to compare the effectiveness of CBT to other <i>bona fide</i> and non- <i>bona fide</i> treatments, published up to May 2005.                                                                                               | Lack of data for a number of treatments.                                                                                       | Cognitive behavioural therapy was more efficacious than non- <i>bona fide</i> treatments when assessed with directly relevant measures ( $d = 0.570$ , $P < 0.0001$ ). There was no evidence to suggest any difference in efficacy between CBT and other <i>bona fide</i> treatments. <i>Bone fide</i> treatments overall were significantly superior to non- <i>bone fide</i> treatments ( $d = 0.525$ , $p < 0.0001$ ). Full CBT treatments (e.g., adolescent CBT + parent training) were similarly efficacious as component treatment (e.g., adolescent CBT alone).                                                                                                                                                                                                                                                                                         |
| <b>Adults</b>                   |                                                                                                                                                                                     |                                                                                                                                                                                                                                                   |                                                                                                                                |                                                                                                                                                                                                                                                                                                                                                                                                                                                                                                                                                                                                                                                                                                                                                                                                                                                                |

| Study          | Participants                                                                                                 | Methods                                                                                                                                                                                                       | Limitations                                                                                                            | Conclusions                                                                                                                                                                                                                                                                                                                                                                                                                                                                                                |
|----------------|--------------------------------------------------------------------------------------------------------------|---------------------------------------------------------------------------------------------------------------------------------------------------------------------------------------------------------------|------------------------------------------------------------------------------------------------------------------------|------------------------------------------------------------------------------------------------------------------------------------------------------------------------------------------------------------------------------------------------------------------------------------------------------------------------------------------------------------------------------------------------------------------------------------------------------------------------------------------------------------|
| Steinert 2017  | n = 2,751 adult patients with depressive disorders or other mental disorders; follow-up of 0 to 55.5 months. | Meta-analysis of 23 RCTs testing the equivalence of psychodynamic therapy versus other treatments with established efficacy published up to December 2016.                                                    | No trials comparing psychodynamic therapy to therapies other than CBT were identified.                                 | All comparisons were to CBT. The pooled between-group difference for target symptoms at post-treatment was $g = -0.158$ , 90% CI = $-0.236$ to $-0.080$ , $P = 0.026$ , indicating equivalence. Treatments were equivalent for general psychiatric symptoms post-treatment and at follow-up, and psychosocial functioning post-treatment. Moderator analysis showed that results were valid across disorders.                                                                                              |
| Gertler 2015   | n = 77 adults with post-TBI depression; follow-up NR.                                                        | Planned meta-analysis that included only 1 RCT comparing the effectiveness of CBT and supportive psychotherapy, published up to February 2015.                                                                | Lack of data for children; high dropout rate; very limited evidence.                                                   | No studies in children were identified. There was no difference between treatment groups in terms of reduction in depression symptoms or quality of life at post-treatment. High drop-out rate may suggest these treatments are not practical for those with TBI. No compelling evidence in support of either treatment.                                                                                                                                                                                   |
| Linde 2015     | n = 7,024 adult primary care patients with unipolar depressive disorders; follow-up NR.                      | Network meta-analysis of 37 RCTs including 9 psychotherapy conditions to test their comparative efficacy (CBT, IPT, problem-solving, psychodynamic, other, combination therapies), published up to June 2013. | Possible systematic differences in study groups across nodes; low confidence in outcomes; lack of head-to-head trials. | There was no difference in efficacy in terms of response to treatment across the 9 conditions, except that remote therapist-led CBT was superior to face-to-face IPT (OR = 0.60, 95% CrI = 0.37 to 0.95). There was no difference between remote-therapist led, guided self-help, non/minimal contact, and therapist-led CBT. Findings were similar when remission or post-treatment scores were used as the outcome. Credible intervals were often too large to rule out clinically relevant differences. |
| Andersson 2014 | n = 1,053 adults with psychiatric and somatic conditions; follow-up NR.                                      | Meta-analysis of 13 (2 for depression) studies to compare the effectiveness of guided I-CBT and face-to-face CBT (individual or group format), published up to July 2013.                                     | Few studies for each condition (limited power); no analysis of long-term effects.                                      | Pooled between-group treatment effect size was non-significant, indicating equivalence between the two treatments. Analysis specific to the two studies on depression also showed equivalence.                                                                                                                                                                                                                                                                                                             |
| Kriston 2014   | n = 2,657 adults with persistent depressive disorder; follow-up NR.                                          | Network meta-analysis of 15 RCTs of acute psychotherapeutic (CBASP, IPT) or combined interventions (with medication) to test their comparative effectiveness, published up to January 2013.                   | Possible confounding by diagnosis; lack of RCTs on some treatments (e.g., psychodynamic psychotherapy).                | CBASP was more efficacious in terms of response rate than IPT (OR = 0.45, CrI = 0.18 to 0.93). A moderate recommendation can be given to CBASP as acute monotherapy but IPT without medication cannot be recommended.                                                                                                                                                                                                                                                                                      |
| Barth 2013     | n = 15,118 adults with a depressive disorder or an elevated level of depressive                              | Network meta-analysis of 198 RCTs to compare the efficacy of various psychological treatments (CBT, BA, IPT, problem-solving, supportive, social skills, psychodynamic                                        | Variation in robustness of evidence across therapeutic approaches; lack of generalisability                            | Most relative effects of psychotherapeutic interventions were absent to small, and all but one failed to reach statistical significance. Interpersonal therapy was significantly superior to supportive therapy ( $d = -0.30$ , 95% CI = $-0.54$ to $-0.05$ ), but this was based on only 2 studies. Subgroup analysis showed                                                                                                                                                                              |

| Study          | Participants                                                                                                                | Methods                                                                                                                                                                                                                                                             | Limitations                                                                                                                                | Conclusions                                                                                                                                                                                                                                                                                                                                                                                                                                                                                                                                                                                                                                                                                                                                                                                                                                                |
|----------------|-----------------------------------------------------------------------------------------------------------------------------|---------------------------------------------------------------------------------------------------------------------------------------------------------------------------------------------------------------------------------------------------------------------|--------------------------------------------------------------------------------------------------------------------------------------------|------------------------------------------------------------------------------------------------------------------------------------------------------------------------------------------------------------------------------------------------------------------------------------------------------------------------------------------------------------------------------------------------------------------------------------------------------------------------------------------------------------------------------------------------------------------------------------------------------------------------------------------------------------------------------------------------------------------------------------------------------------------------------------------------------------------------------------------------------------|
|                | symptoms; no follow-up.                                                                                                     | therapy) and modes of delivery, published up to November 2012.                                                                                                                                                                                                      | outside Western countries; no long-term outcome data.                                                                                      | that patient characteristics and intervention format had no influence on treatment effects.                                                                                                                                                                                                                                                                                                                                                                                                                                                                                                                                                                                                                                                                                                                                                                |
| Braun 2013     | n = 3,965 adults with a depressive disorder or an elevated level of depressive symptomology; follow-up from 1 to 24 months. | Meta-analysis of 53 RCTs directly comparing two or more <i>bona fide</i> psychological therapies (CBT, BA, IPT, ACT, psychodynamic, supportive, problem-solving, interpersonal, social skills, mindfulness-based CBT therapies, others), published up to June 2012. | Small sample sizes for some studies; inadequate studies to investigate all treatment pairs; potential confounding by unmeasured variables. | CBT, BA, IPT and psychodynamic therapies were equally efficacious at post-treatment, except for supportive therapy which was less efficacious according to patient (Rogers, $g = 0.26$ , 95% CI = 0.02 to 0.49, $P < 0.05$ ) and clinician (non-Rogers, $g = 0.36$ , 95% CI = 0.15 to 0.58, $P < 0.01$ ) ratings. All treatments were equally efficacious for remission, except for supportive therapies which were less efficacious (OR = 0.61, 95% CI = 0.42 to 0.89, $P = 0.010$ ). No difference between treatments was found at follow-up. Subgroup analyses showed a higher efficacy of BA vs. other treatments with increasing age, and CBT appeared to be more efficacious for females than males. CBT appeared to be more efficacious than other treatments when it lasted >90 minutes, while BA was more efficacious when it lasted <90 minutes. |
| Dedert 2013    | n = 7,270 adults with depressive disorder, PTSD, panic disorder, or generalized anxiety disorder; no follow-up analyses.    | Meta-analysis of 47 RCTs (15 for depression) comparing the effectiveness of I-CBT with face-to-face CBT and varying levels of therapist support, published from 1990 to 2013.                                                                                       | Limited available data; insufficient evidence to draw conclusions.                                                                         | Exploratory analysis using indirect comparisons showed an association between higher levels of support and greater treatment effects. Two small studies compared different levels of therapist support directly and found no differences in treatment effect. There were inadequate data (2 studies, 254 participants) to evaluate the differential effect between I-CBT and face-to-face CBT for depression specifically.                                                                                                                                                                                                                                                                                                                                                                                                                                 |
| Hunot 2013     | n = 144 adults with acute depression; follow-up to 2 months.                                                                | Meta-analysis of 3 RCTs comparing the effectiveness of 3 <sup>rd</sup> wave CBT approaches with any other psychological therapy approach (CBT, psychodynamic, behavioural, humanistic, integrative therapies), published up to 2013.                                | Limited evidence in terms of quantity, quality and breadth; low quality of evidence; lack of statistical power.                            | Post-treatment results showed no difference between 3 <sup>rd</sup> wave CBT (ACT and BA) and other psychological therapies for efficacy of clinical response or remission rate. At 2-month follow-up there was no evidence of any difference between 3 <sup>rd</sup> wave CBT and other psychological therapies for clinical response. Quality of evidence was very low as assessed using GRADE.                                                                                                                                                                                                                                                                                                                                                                                                                                                          |
| Shinohara 2013 | n = 955 adults with acute depression; follow-up from 5 weeks to 6 months.                                                   | Meta-analysis of 25 RCTs comparing the effectiveness of various behavioural therapies with any other psychological therapy approach (CBT, 3 <sup>rd</sup> wave CBT, psychodynamic, humanistic, integrative                                                          | Weak evidence base; small sample sizes and large amounts of imputed data.                                                                  | Compared to all other psychological therapies together, behavioural therapy showed no difference in response rate. In subgroup analyses comparing BT to the five other classes of psychotherapies, low-quality evidence showed no difference in treatment response. There was also no difference in remission rates between BT and CBT or humanistic therapies (no data for other therapies). At up to 6 month follow-up, behavioural therapy was inferior to CBT for response (RR =                                                                                                                                                                                                                                                                                                                                                                       |

| Study         | Participants                                                                                                                                                  | Methods                                                                                                                                                                                                                                   | Limitations                                                                                                                                              | Conclusions                                                                                                                                                                                                                                                                                                                                                                                                                                                                                                                                                                                                                                 |
|---------------|---------------------------------------------------------------------------------------------------------------------------------------------------------------|-------------------------------------------------------------------------------------------------------------------------------------------------------------------------------------------------------------------------------------------|----------------------------------------------------------------------------------------------------------------------------------------------------------|---------------------------------------------------------------------------------------------------------------------------------------------------------------------------------------------------------------------------------------------------------------------------------------------------------------------------------------------------------------------------------------------------------------------------------------------------------------------------------------------------------------------------------------------------------------------------------------------------------------------------------------------|
|               |                                                                                                                                                               | therapies), published up to 2010.                                                                                                                                                                                                         |                                                                                                                                                          | 0.76, 95% CI = 0.59 to 0.99) and remission (RR = 0.77, 95% CI = 0.61 to 0.98).                                                                                                                                                                                                                                                                                                                                                                                                                                                                                                                                                              |
| Jakobsen 2012 | n = 741 adults with major depressive disorder; follow-up to 1 year in 1 study.                                                                                | Meta-analysis of 7 RCTs to compare the effectiveness of CBT and IPT, published up to August 2010.                                                                                                                                         | Few included trials; all trials at risk of bias; limited evidence for long-term effects.                                                                 | At treatment completion, the effect of CBT and IPT on depressive symptoms did not differ. There was no difference in risk of 'no remission' across therapies. Only one trial included follow-up data showing no difference between the effect of CBT and IPT on depressive symptoms at 1-year post-treatment.                                                                                                                                                                                                                                                                                                                               |
| Cuijpers 2011 | n = NR adults with depression, no follow-up.                                                                                                                  | Meta-analysis of 173 RCTs to compare the effectiveness of 7 psychological therapy approaches (CBT, BA, IPT, non-directive supportive, problem-solving, interpersonal, social skills therapies) and formats, published up to January 2010. | Though the number of RCTs was large, the number of studies for specific subgroups was small; potential lack of statistical power; no long-term outcomes. | There was no indication that CBT, BA, psychodynamic therapy, problem-solving therapy, and social skills training differ from each other in terms of effectiveness in reducing symptoms of depression. However, IPT was slightly more efficacious than all other therapies combined (d = 0.21, 95% CI = 0.01 to 0.42), and non-directive supportive therapy was slightly less efficacious than all other therapies combined (d = -0.17, 95% CI = -0.32 to -0.03). Treatments in varying formats (face-to-face vs. guided self-help and individual vs. group) appeared to be equally efficacious.                                             |
| Cape 2010     | n = 3,962 adults with anxiety, depression, unspecified common mental health problems, or 'emotional distress'; follow-up NR.                                  | Meta-analysis of 34 RCTs (14 for depression) comparing the effectiveness of various brief psychological therapies (CBT, IPT, counselling, problem-solving therapy, psychodynamic psychotherapy).                                          | Possible publication bias; high heterogeneity.                                                                                                           | For studies of depression and mixed anxiety and depression, there was no difference in effectiveness between counselling and CBT, problem-solving therapy and CBT, or counselling and problem-solving therapy.                                                                                                                                                                                                                                                                                                                                                                                                                              |
| Tolin 2010    | n = 1,981 adults with mental disorders including depression, anxiety, eating disorders, psychosis, and substance use disorders; follow-up to 6 and 12 months. | Meta-analysis of 26 RCTs to test whether the effectiveness of CBT is superior to other <i>bona fide</i> forms of psychotherapy (psychodynamic, supportive, interpersonal therapies), published up to September 2007.                      | Small number of studies for some sub-analyses; findings not robust.                                                                                      | Cognitive behavioural therapy was superior to psychodynamic therapy but not to interpersonal or supportive therapies at post-treatment (d = 0.28, 95% CI - 0.12 to 0.44, P < 0.05) and at 6-month follow-up (d = 0.50, 95% CI = 0.29 to 0.71) and at 12-month follow-up (d = 0.55, 95% CI = 0.30 to 0.81) in terms of scores on measures of primary symptoms. At follow-up there was only one study to compare CBT to IPT or supportive therapy. For anxiety and depressive disorder specifically, the findings were similar. Effect sizes were not significantly associated with the number of sessions or group vs. individual therapies. |



| Study                   | Participants                                                                                         | Methods                                                                                                                                                                                                                                     | Limitations                                                                                                                     | Conclusions                                                                                                                                                                                                                                                                                                                                                                                                                                                                              |
|-------------------------|------------------------------------------------------------------------------------------------------|---------------------------------------------------------------------------------------------------------------------------------------------------------------------------------------------------------------------------------------------|---------------------------------------------------------------------------------------------------------------------------------|------------------------------------------------------------------------------------------------------------------------------------------------------------------------------------------------------------------------------------------------------------------------------------------------------------------------------------------------------------------------------------------------------------------------------------------------------------------------------------------|
| Cuijpers 2010           | n = 810 adults with anxiety or depressive disorders; follow-up to 12 months.                         | Meta-analysis of 21 RCTs (6 for depression) to compare the effectiveness of guided self-help compared to face-to-face psychotherapies, published up to January 2009.                                                                        | Need to investigate applicability to clinical practice; small sample size in some studies; low quality of many studies.         | At post-treatment and at 1-3 months, 4-6 months, and 12-months follow-up, there was no difference in effectiveness between guided self-help and face-to-face psychotherapy.                                                                                                                                                                                                                                                                                                              |
| Cuijpers 2008           | n = 2,757 adults with mild to moderate depression; follow-up to maximum of 24 months.                | Meta-analysis of 53 RCTs comparing the effectiveness of 7 major types of psychological treatment (CBT, BA, IPT, nondirective supportive, problem-solving, psychodynamic, interpersonal, social skills therapies), published up to May 2007. | Inadequate number of studies for all analyses; suboptimal study quality; may not be generalizable to non-Caucasian populations. | There was no strong indication that any of the treatments were more or less efficacious than the others, with the exception of IPT which was somewhat more efficacious (d = 0.20, 95% CI = 0.02, 0.38, P < 0.05) and supportive treatment which was somewhat less efficacious than the other treatments (d = -0.12, 95% CI = -0.30 to -0.01, P < 0.05). There was no evidence that the differences between treatments increased or decreased over time for follow-up of up to 24 months. |
| Nieuwenhuijsen 2008     | n = 247 adult workers (employees or self-employed) with depressive disorders; follow-up to one year. | Planned meta-analysis which included only 1 RCT comparing the effectiveness of worker-directed psychological interventions (problem-solving therapy vs. generic community mental health care), published up to August 2006.                 | Few studies; low quality evidence.                                                                                              | No difference in effectiveness was found for days of sickness absence or depressive symptoms between the two treatments.                                                                                                                                                                                                                                                                                                                                                                 |
| <b>Postpartum women</b> |                                                                                                      |                                                                                                                                                                                                                                             |                                                                                                                                 |                                                                                                                                                                                                                                                                                                                                                                                                                                                                                          |
| Dennis 2007             | n = 788 postpartum women with depressive symptomatology; no follow-up analyses.                      | Meta-analysis of 2 RCTs to compare the effectiveness of psychosocial and psychological interventions, as well as intervention modes, published up to August 2007.                                                                           | Poor methodological quality of studies.                                                                                         | There was no difference in the beneficial effect of reducing depressive symptoms between psychological and psychosocial interventions. There was inadequate evidence to ascertain if group vs. individual approaches were equally efficacious.                                                                                                                                                                                                                                           |
| <b>Older adults</b>     |                                                                                                      |                                                                                                                                                                                                                                             |                                                                                                                                 |                                                                                                                                                                                                                                                                                                                                                                                                                                                                                          |
| Samad 2011              | n = 154 older adults (≥55 years) with depression; follow-up to 3 months.                             | Meta-analysis of 5 RCTs to compare the effectiveness of various psychological therapies (CBT, IPT, psychodynamic and supportive therapies), published up to July 2009.                                                                      | Studies were underpowered to detect differences; short follow-up.                                                               | There was no difference in the self-rated effectiveness of behavioural therapy and cognitive therapy at treatment completion or at 1-3 months follow-up (data combined). The type of health professional did not appear to impact this comparison. Behavioural therapy seemed slightly more effective than brief psychodynamic therapy but this was not significant.                                                                                                                     |



| Study                    | Participants                                                                                                              | Methods                                                                                                                                                                                                                                                               | Limitations                                                                                                                              | Conclusions                                                                                                                                                                                                                                                                                                                                                                                                                                                                                                                                                                                                                                                                                                                                                              |
|--------------------------|---------------------------------------------------------------------------------------------------------------------------|-----------------------------------------------------------------------------------------------------------------------------------------------------------------------------------------------------------------------------------------------------------------------|------------------------------------------------------------------------------------------------------------------------------------------|--------------------------------------------------------------------------------------------------------------------------------------------------------------------------------------------------------------------------------------------------------------------------------------------------------------------------------------------------------------------------------------------------------------------------------------------------------------------------------------------------------------------------------------------------------------------------------------------------------------------------------------------------------------------------------------------------------------------------------------------------------------------------|
| Wilson 2008              | n = 197 older adults (≥55 years) with depression; follow-up from 12 to 16 weeks.                                          | Meta-analysis of 3 RCTs comparing the effectiveness of various psychological therapies (CBT, cognitive, behavioural, psychodynamic therapies), published up to September 2006.                                                                                        | Few trials and small sample sizes; high dropout rates; cannot be generalized to clinical populations (all trials were in the community). | There was no difference in treatment effect between CBT and psychodynamic therapy in terms of reduction in symptoms or clinical response. There was no difference in treatment effect between cognitive and behavioural therapies in terms of reduction in symptoms.                                                                                                                                                                                                                                                                                                                                                                                                                                                                                                     |
| <b>Mixed populations</b> |                                                                                                                           |                                                                                                                                                                                                                                                                       |                                                                                                                                          |                                                                                                                                                                                                                                                                                                                                                                                                                                                                                                                                                                                                                                                                                                                                                                          |
| Burlingame 2016          | n = 6,293 children and adults with a mental disorder amenable to psychological treatment; maximum follow-up of 30 months. | Meta-analysis of 70 studies testing the equivalence of individual and group formats of any <i>bona fide</i> psychological treatments (CBT, behavioural, cognitive, psychodynamic, interpersonal, supportive, mixed, integrative and dialectal behavioural therapies). | Unexplained heterogeneity in some analyses; low power; uncorrected intragroup dependency.                                                | The average effect sizes for primary outcomes for the 46 studies comparing identical treatments and the 21 studies comparing non-identical treatments were non-significant, indicating equivalence. Effects for short, moderate, and long-term follow-up, post-treatment remission and improvement also supported equivalence. Heterogeneity in some analyses not explained by diagnosis.                                                                                                                                                                                                                                                                                                                                                                                |
| Montgomery 2010          | n = 289 adults and older adults with anxiety or depressive disorders; follow-up NR.                                       | Narrative review of 4 studies to compare the effectiveness of cognitive and/or behavioural therapies delivered via paraprofessional compared to a professionally trained therapist, published up to September 2005.                                                   | Small number of included studies; lack of recent studies.                                                                                | It appears that paraprofessional therapists can be effective in delivering CBT. Data from two studies show slight outcome advantages for professionals, but overall paraprofessionals seem to be able to achieve similar outcomes. When CBT was applied more rigorously, patients showed greater improvements in outcome measures.                                                                                                                                                                                                                                                                                                                                                                                                                                       |
| Jorm 2008                | n = 286 children and adults with depression or with a high level of depressive symptoms; follow-up from 1 to 6 months.    | Meta-analysis of 9 RCTs to compare the effectiveness of relaxation compared to other psychological therapies                                                                                                                                                          | Unexplained heterogeneity; lack of functional outcomes; risk of bias in older trials.                                                    | Relaxation produced less effect than psychological (mainly CBT) treatments on self-reported depression at post-treatment (SMD = 0.38, 95% CI = 0.14 to 0.62) and at short-term follow-up (SMD = 0.36, 95% CI = 0.07 to 0.65); there was no difference at long-term follow-up. Three trials showed no difference between relaxation and other psychological treatments on clinician-rated depression at post-intervention or at follow-up. Risk of non-response was higher for relaxation at post-treatment based on self-report (RR = 1.71, 95% CI = 1.25 to 2.34) and clinician measures (RR = 1.96, 95% CI = 1.20 to 3.22), as well as at follow up based on self-report (RR = 1.88, 95% CI = 1.05 to 3.34) and clinician measures (RR = 1.42, 95% CI = 0.91 to 2.21). |
| Henken 2007              | n = 519 individuals (children and                                                                                         | Narrative synthesis of 6 RCTs comparing the effectiveness of                                                                                                                                                                                                          | Limited available evidence.                                                                                                              | There is limited evidence that family therapy is less effective than individual CBT for depressive symptoms, limited evidence that cognitive behavioural family therapy is equally                                                                                                                                                                                                                                                                                                                                                                                                                                                                                                                                                                                       |

1  
2  
3  
4  
5  
6  
7  
8  
9  
10  
11  
12  
13  
14  
15  
16  
17  
18  
19  
20  
21  
22  
23  
24  
25  
26  
27  
28  
29  
30  
31  
32  
33  
34  
35  
36  
37  
38  
39  
40  
41  
42  
43  
44  
45  
46  
47

| Study | Participants             | Methods                                                | Limitations | Conclusions                                                    |
|-------|--------------------------|--------------------------------------------------------|-------------|----------------------------------------------------------------|
|       | adults) with depression. | family therapy compared to CBT or behavioural therapy. |             | effective as behaviour family therapy for depressive symptoms. |

ACT: acceptance and commitment therapy; BA: behavioural activation therapy; CBASP: cognitive behavioural analysis system of psychotherapy; CBT: cognitive behavioural therapy; CI: confidence interval; CrI: credible interval; GRADE: Grading of Recommendations, Assessment, Development and Evaluation; I-CBT: Internet cognitive behavioural therapy; IPT: Interpersonal psychotherapy; NR: not reported; OR: odds ratio; PTSD: post-traumatic stress disorder; RCT: randomised controlled trial; RR: risk ratio; SMD: standardised mean difference; TBI: traumatic brain injury

For peer review only

**Q4. What are the prevention strategies/tactics for reducing self-harm and suicide in children, youth and adults with depression?**

| Study and design                              | Participants                                                                                                                                | Methods                                                                                                                                                                                               | Limitations                                                                                                                                                                                                                                                              | Conclusions                                                                                                                                                                                                                                                                                                        |
|-----------------------------------------------|---------------------------------------------------------------------------------------------------------------------------------------------|-------------------------------------------------------------------------------------------------------------------------------------------------------------------------------------------------------|--------------------------------------------------------------------------------------------------------------------------------------------------------------------------------------------------------------------------------------------------------------------------|--------------------------------------------------------------------------------------------------------------------------------------------------------------------------------------------------------------------------------------------------------------------------------------------------------------------|
| <b>Children, Adolescents and Young Adults</b> |                                                                                                                                             |                                                                                                                                                                                                       |                                                                                                                                                                                                                                                                          |                                                                                                                                                                                                                                                                                                                    |
| Pu 2017<br>Systematic review                  | n = 538 young depressive patients from 7 trials.                                                                                            | Multiple databases were searched until May 2016 for publications examining IPT compared to a control condition in children and adolescents with depression, with meta-analysis performed.             | Small number of included studies, leading to small sample size and low statistical power. Did not find studies in children, and there is potential publication bias. Modified IPT was not examined.                                                                      | No evidence that IPT reduces the risk of suicide, based on this data. IPT appears to be superior to control in treating adolescent depression.                                                                                                                                                                     |
| Das 2016<br>Overview of reviews               | n = NR adolescents and youth (11-24y) from 38 publications, with a variety of mental health concerns.                                       | Multiple databases were searched until December 2015 for systematic reviews looking at mental health interventions in an adolescent population. Quality assessment was performed on included studies. | Findings from school-based studies are limited due to low quality.                                                                                                                                                                                                       | School-based suicide prevention programs indicate that didactic and experiential programs can increase short-term suicide and suicide prevention knowledge, but do not appear to impact suicide-related attitudes or behaviours.                                                                                   |
| Devenish 2016<br>Systematic review            | n = NR adolescents (11-19y) from 35 publications, where adolescents received a psychological intervention to reduce symptoms of depression. | Systematic review of multiple databases up to April 2015 to identify publications examining psychological interventions to prevent or treat depression, where suicidality outcomes were reported.     | High risk of bias in included studies, and limited research to date. High rates of attrition in some types of intervention studies created small sample sizes for analysis, and lack of reporting on comparisons all require the results to be interpreted with caution. | The studies examined in this review suggest that psychological interventions are at least as efficacious as other treatments for depressive symptoms, and shows promise for the treatment suicidality. However, further research is needed.                                                                        |
| Perry 2016<br>Systematic review               | n = 22 adolescents (14-18y) from one trial, reporting previous suicidal ideation.                                                           | Systematic review of multiple databases for online and mobile psychosocial interventions for suicide prevention in young people, with results up to May 2015.                                         | Lack of relevant literature on this topic.                                                                                                                                                                                                                               | The single included study shows promising results, however, more evidence is needed to determine the effectiveness of online and mobile interventions on suicide prevention in youth.                                                                                                                              |
| Bennett 2015<br>Overview of reviews           | n = NR youth (0-24y) from 28 included reviews, focusing on both school-based and non-school-based interventions.                            | Systematic review methodology was applied to locate existing systematic reviews, up to May 2012, of youth suicide prevention intervention, both in and outside of schools.                            | Few RCTs of prevention programs for suicidal youth, with little data on the impact of these programs. Little to no evidence is available for gender differences and other subgroups such as Indigenous youth.                                                            | School-based prevention reviews did not report reduced suicide death, but did report less suicide attempts, ideation, and other measures of suicide risk. Interventions aiming to reduce repeat suicide attempts show promise, but more research is needed to determine the successful elements of these programs. |

| Study and design                   | Participants                                                                                         | Methods                                                                                                                                                               | Limitations                                                                                                                                                                                                             | Conclusions                                                                                                                                                                                                                                    |
|------------------------------------|------------------------------------------------------------------------------------------------------|-----------------------------------------------------------------------------------------------------------------------------------------------------------------------|-------------------------------------------------------------------------------------------------------------------------------------------------------------------------------------------------------------------------|------------------------------------------------------------------------------------------------------------------------------------------------------------------------------------------------------------------------------------------------|
| Hawton 2015<br>Systematic review   | n = 1126 participants from 11 trials (up to 18y) with recent ( $\leq 6$ mo) self-harm episode.       | Systematic review of multiple databases to 30 January 2015, examining psychosocial and pharmacological interventions for self-harm in children and adolescents.       | Conclusions are limited to small range of potential interventions and outcomes. Included trials were of high risk of bias.                                                                                              | There is minimal support for group-based psychotherapy for adolescents who have self-harmed, and therapeutic assessment, mentalization, and dialectical behaviour therapy require further evaluation. More large-scale trials are required.    |
| Katz 2013<br>Systematic review     | n = NR participants from 16 studies (0-18y) enrolled in school-based suicide prevention programs.    | Systematic review of literature up to 2012 examining school-based suicide prevention programs for youth.                                                              | Few programs evaluated reduction of suicide attempts, and few RCTs exist on this topic.                                                                                                                                 | Few evidence-based, school-based suicide prevention programs were identified. A combination of programs may be effective.                                                                                                                      |
| Townsend 2010<br>Systematic review | n = NR participants from 10 studies (mean age 19y).                                                  | Systematic review of multiple databases up to August 2007 to identify interventions for young offenders with mood disorders, anxiety, or self-harm.                   | Included trials are methodologically weak, with short follow-up periods and a wide variety of comparison interventions.                                                                                                 | Group-based CBT may be helpful among young offenders for treatment of depressive symptoms.                                                                                                                                                     |
| <b>Adults</b>                      |                                                                                                      |                                                                                                                                                                       |                                                                                                                                                                                                                         |                                                                                                                                                                                                                                                |
| Hawton 2016a<br>Systematic review  | n = 8480 participants (adults) from 29 studies, where participants had a prior episode of self-harm. | Systematic review of multiple databases until 29 April 2015, examining effectiveness of aftercare interventions for self-harm in adults at reducing future self-harm. | Few trials exist for interventions other than CBT, limiting the ability to draw conclusions.                                                                                                                            | CBT appears to be effective in patients with a history of self-harm. Dialectical therapy reduced frequency of self-harm but not proportion of patients repeating self-harm.                                                                    |
| Hawton 2016b<br>Systematic review  | N = 17,699 participants (adults) from 55 included trials of self-harm interventions.                 | Systematic review of multiple databases until 29 April 2015 of psychosocial treatments for adults who have a history of self-harm.                                    | Data on adverse effects were not reported, and information on subgroups, such as male vs female, was limited.                                                                                                           | CBT reduces the number of patients repeating self-harm, however quality of evidence is low. Dialectical behaviour therapy may reduce the frequency of self-harm in people with multiple episodes. Data on other interventions is inconclusive. |
| Cuijpers 2013<br>Systematic review | n = 616 patients (adults) from 13 studies.                                                           | Systematic review, until January 2012, of psychotherapy for depression that included studies reporting suicidality outcomes.                                          | There are few included studies, resulting in insufficient statistical power to make strong conclusions. Quality of included studies was low, heterogeneity was high, and the studies do not provide long-term outcomes. | Evidence available is insufficient to determine if psychotherapy can reduce the risk of suicidality in depressed patients.                                                                                                                     |

| Study and design                     | Participants                                                                                                         | Methods                                                                                                                                                                                                                                         | Limitations                                                                                                                                                                                                                             | Conclusions                                                                                                                                                                                                                                                                                |
|--------------------------------------|----------------------------------------------------------------------------------------------------------------------|-------------------------------------------------------------------------------------------------------------------------------------------------------------------------------------------------------------------------------------------------|-----------------------------------------------------------------------------------------------------------------------------------------------------------------------------------------------------------------------------------------|--------------------------------------------------------------------------------------------------------------------------------------------------------------------------------------------------------------------------------------------------------------------------------------------|
| Jakobsen 2011<br>Systematic review   | n = 669 participants with major depressive disorder from 12 studies (>17y).                                          | Systematic review with meta-analysis, up to February 2010, of depressive patients receiving either cognitive therapy or no intervention.                                                                                                        | All included studies had high risk of bias. Patient characteristics, including depression severity, differed by trial.                                                                                                                  | Cognitive therapy appears to be effective for depression, but the effect on suicidality is unclear.                                                                                                                                                                                        |
| <b>Elderly</b>                       |                                                                                                                      |                                                                                                                                                                                                                                                 |                                                                                                                                                                                                                                         |                                                                                                                                                                                                                                                                                            |
| Okolie 2017<br>Systematic review     | n = NR elderly participants (≥60y) in 21 included studies.                                                           | A systematic review including publications up to 1 April 2016. Interventions to prevent suicide and suicide ideation in the elderly were examined.                                                                                              | Results are limited to only English publications. Some included studies had overlapping populations.                                                                                                                                    | Primary care and population-based multifaceted interventions, as well as those focused on at-risk elderly individuals in the community may be effective at preventing suicidal behaviour and suicidal ideation in older adults.                                                            |
| Lapierre 2011<br>Systematic review   | n = NR elderly participants (≥60y) in 19 included studies which described 11 unique interventions.                   | Systematic review of interventions of elderly suicidal people, to 2009.                                                                                                                                                                         | NR                                                                                                                                                                                                                                      | Interventions for suicidal elderly people should improve resilience, promote positive aging, engage family and community, and use telecommunication to reach them. Studies evaluating means restriction and physician education are needed. Interventions seemed more successful in women. |
| <b>All ages or age not indicated</b> |                                                                                                                      |                                                                                                                                                                                                                                                 |                                                                                                                                                                                                                                         |                                                                                                                                                                                                                                                                                            |
| Berrouguet 2016<br>Systematic review | n = NR participants from 36 studies, receiving text messaging interventions for a variety of mental health concerns. | Systematic review of applications of text messaging in mental health care, up to May 2015.                                                                                                                                                      | Baseline use of technology varied greatly between groups, which might impact the success of a program.                                                                                                                                  | A positive attitude to text messaging interventions was found across conditions. Text messaging was found to be effective in studies looking at suicidal behaviour.                                                                                                                        |
| Meerwijk 2016<br>Systematic review   | n = 13,369 participants from 53 articles reporting on 44 unique trials.                                              | Systematic review of literature to 25 December 2015, for publications comparing interventions that directly target suicidal thoughts and behaviour with those that approach suicide in an indirect way (ex. Hopelessness, depression, anxiety). | Suicide outcomes may not have captured benefits to other areas of mental health. Diagnostic groups were varied, with different medication regimes (which could influence suicide risk). There was heterogeneity between control groups. | Psychosocial and behavioural interventions that directly address suicide are effective in both long and short term, while indirect interventions are only effective in the long term.                                                                                                      |
| Zalsman 2016<br>Systematic review    | n = NR participants from 164 studies.                                                                                | Systematic review of suicide prevention studies, between 1 January 2005 and 31 December 2014.                                                                                                                                                   | Study heterogeneity did not allow meta-analysis.                                                                                                                                                                                        | No strategy appeared to be more effective than others. Combined evidence-based strategies for                                                                                                                                                                                              |

| Study and design                                   | Participants                                            | Methods                                                                                                                                  | Limitations                                                                                                                                                                                                             | Conclusions                                                                                                                                                                                                                                                         |
|----------------------------------------------------|---------------------------------------------------------|------------------------------------------------------------------------------------------------------------------------------------------|-------------------------------------------------------------------------------------------------------------------------------------------------------------------------------------------------------------------------|---------------------------------------------------------------------------------------------------------------------------------------------------------------------------------------------------------------------------------------------------------------------|
| O'Connor 2013<br>Systematic review                 | n = NR participants of all ages in 56 included studies. | Systematic review of literature until 17 July 2012 on screening instruments and treatments for suicide risk in primary care populations. | Populations were high-risk rather than screening-confirmed. Evidence for groups other than adults, and for racial/ethnic minorities was limited.                                                                        | suicide prevention should be tested to determine the best individual and population level options.<br>Psychotherapy may reduce the risk of suicide attempts in high-risk adults, but no effective therapy for high-risk adolescents was identified.                 |
| Van Der Feltz-Cornelis 2011<br>Overview of reviews | n = NR participants from 6 included systematic reviews. | This overview searched for systematic reviews examining intervention to prevent suicidal behaviour.                                      | Unable to generate effect sizes due to provided data. Due to inclusion of systematic reviews only, newer research may have been missed. Most studies were conducted in Europe, which may limit global generalizability. | Evidence-based best practice activities for suicide prevention were identified, however more research is needed to identify synergistic multi-level interventions.                                                                                                  |
| Fountoulakis 2009<br>Systematic review             | n = NR participants from 17 included studies.           | Systematic review of a single database up to January 2008 of suicide prevention in patients with bipolar disorder.                       | NR                                                                                                                                                                                                                      | Three psychosocial strategies appeared successful in this review of the literature: Applying interventions to elicit emergency care at times of distress; Training in problem-solving strategies; and combining comprehensive interventions for suicide prevention. |

CBT: Cognitive behaviour therapy; ex.: example; IPT: interpersonal psychotherapy; mo: months; NR: not reported; RCT: randomized controlled trial; y: years.

1  
2  
3  
4  
5  
6  
7  
8  
9  
10  
11  
12  
13  
14  
15  
16  
17  
18  
19  
20  
21  
22  
23  
24  
25  
26  
27  
28  
29  
30  
31  
32  
33  
34  
35  
36  
37  
38  
39  
40  
41  
42  
43  
44  
45  
46  
47

**Q7. Can diet or exercise affect the development of depression?**

| Study and design                                  | Participants                                                                                 | Methods                                                                                                                                                                                                                                                                                                      | Limitations                                                                                                                                                                                                                                                                       | Conclusions                                                                                                                                                                                                                                                                                    |
|---------------------------------------------------|----------------------------------------------------------------------------------------------|--------------------------------------------------------------------------------------------------------------------------------------------------------------------------------------------------------------------------------------------------------------------------------------------------------------|-----------------------------------------------------------------------------------------------------------------------------------------------------------------------------------------------------------------------------------------------------------------------------------|------------------------------------------------------------------------------------------------------------------------------------------------------------------------------------------------------------------------------------------------------------------------------------------------|
| <b>Reviews: Diet and depression</b>               |                                                                                              |                                                                                                                                                                                                                                                                                                              |                                                                                                                                                                                                                                                                                   |                                                                                                                                                                                                                                                                                                |
| Lang 2015 Review                                  | NR                                                                                           | NR – narrative review, methods of identifying studies is not specified.                                                                                                                                                                                                                                      | Most studies are retrospective, meaning mechanisms of dietary interaction or causation cannot be fully explained.                                                                                                                                                                 | Unhealthy Western diet is associated with higher prevalence of depression, while the Japanese and Mediterranean diets are associated with a lower risk of depression. Specific nutrients have been studied, and have been found to have a relationship with depression prevalence.             |
| Williamson 2009 Review                            | NR                                                                                           | NR – narrative review, methods of identifying studies is not specified.                                                                                                                                                                                                                                      | NR                                                                                                                                                                                                                                                                                | The importance of healthy lifestyle habits and good nutrition is emphasized in the literature, especially for older people where poor nutrition status may be common. Health professionals should prioritize supporting the elderly in making healthy lifestyle and dietary choices.           |
| <b>Observational studies: Diet and depression</b> |                                                                                              |                                                                                                                                                                                                                                                                                                              |                                                                                                                                                                                                                                                                                   |                                                                                                                                                                                                                                                                                                |
| Chang 2016 Prospective cohort study               | n = 82,643 women from the Nurses' Health Study, without depression at study entry.           | Dietary intake of flavonoids (and subclasses) was assessed from a FFQ. Incident cases of depression (n = 10,752) at 10 year follow-up were assessed for flavonoid intake, compared to those who did not develop depression, to assess any associations between dietary flavonoid intake and depression.      | FFQ may miss certain foods, or foods could be misclassified due to variations in flavonoid content. There is also the potential for misclassification of depression, likely under ascertainment. Residual confounding, above that controlled for in the analysis, may be present. | Higher intake of flavonoids may be associated with a lower risk of depression, especially among older women. Further research is needed to confirm this association.                                                                                                                           |
| Goinpath 2016 Prospective cohort study            | n = 2,334 participants ≥55 y and 1,952 participants ≥60y, from the Blue Mountains Eye Study. | Participants provided dietary data through a FFQ, and an assessment of depressive symptoms. Information on potential covariates, such as a medical history and lifestyle and health risk behaviours was also collected. Dietary behaviour was assessed for carbohydrate consumption, including GI, GL, total | Potential misclassification due to self-reported dietary intake. Tools for assessing depression are screening tools and not diagnostic. There may be additional confounding factors beyond those controlled for in the analysis.                                                  | There is a modest association between dietary fibre intake and depressive symptoms. Due to the prevalence of depression, it is important to study the relationship between carbohydrate intake and depression further, with RCTs, to determine potential preventative effects in older adults. |



| Study and design                                  | Participants                                                                                                                                                                                                                    | Methods                                                                                                                                                                                                                                                                                                                                                                                                                                            | Limitations                                                                                                                                                                                                                                                         | Conclusions                                                                                                                                                                                                                                                                                                                                                                                                                                                                 |
|---------------------------------------------------|---------------------------------------------------------------------------------------------------------------------------------------------------------------------------------------------------------------------------------|----------------------------------------------------------------------------------------------------------------------------------------------------------------------------------------------------------------------------------------------------------------------------------------------------------------------------------------------------------------------------------------------------------------------------------------------------|---------------------------------------------------------------------------------------------------------------------------------------------------------------------------------------------------------------------------------------------------------------------|-----------------------------------------------------------------------------------------------------------------------------------------------------------------------------------------------------------------------------------------------------------------------------------------------------------------------------------------------------------------------------------------------------------------------------------------------------------------------------|
| Perez-Cornago 2016<br>Prospective cohort study    | n = 14,051 university graduates and professionals. Participants with energy intakes outside of pre-set limits, with chronic disease, or with pre-existing depression were excluded from this analysis. Part of the SUN Project. | carbohydrate consumption, and total sugar intake. Participants were administered a semi-quantitative FFQ at baseline and follow-up (at 4, 6 and 8 years). Dietary intake was assessed for compliance with the DASH diet, and assessed for major depressive disorder. Participants were divided into quintiles based on their diet's comparison to the different aspects of the DASH diet, and rates of depression were assessed for each quintile. | Self-reported clinical diagnosis of depression was accepted, and subtypes/levels of depression were not considered. The compliance with DASH diet indices were self-reported based on the FFQ, and changes to dietary intake in follow-up periods were not updated. | Moderate adherence to some indices for the DASH diet may be associated with a lower risk for depression. Associations are non-linear, requiring further prospective studies to confirm findings before clinical recommendations and generalization can be applied.                                                                                                                                                                                                          |
| Gougeon 2015<br>Prospective cohort study          | n = 1,358 community-dwelling older adults, 67-84y. From a larger cohort. Participants with depression at baseline were excluded.                                                                                                | Dietary assessment was performed at baseline through three 24h dietary recalls, and dietary patterns were analyzed. The Geriatric Depression Scale or new use of antidepressant medication at any year up to the three years of follow-up measured depression incidence. Multiple logistic regression was applied, with adjustments for covariates.                                                                                                | There may have been insufficient variation in diet within this population to observe any differences in depression incidence.                                                                                                                                       | Dietary patterns did not appear related to depression in older adults, however overall intake, possibly reflecting general health decline, is associated with a higher risk of becoming depressed.                                                                                                                                                                                                                                                                          |
| Sanchez-Villegas 2015<br>Prospective cohort study | n = 15,093 university graduates and professionals. Participants with energy intakes outside of pre-set limits, with chronic disease, or with pre-existing depression were excluded from this analysis. Part of the SUN Project. | Participants were administered a semi-quantitative FFQ at baseline and at 10 y follow-up. Dietary patterns were scored for adherence to three diet types: Mediterranean diet, Pro-Vegetarian dietary pattern, and Alternative Health Eating index. Incident cases of depression were the main outcome, and the dietary behaviours of people presenting with depression were compared to those who did not, adjusted for demographic covariates.    | Self-reported dietary intake and depression diagnosis. Participants were not representative of the general Spanish population.                                                                                                                                      | Higher adherence scores for all three diet types was associated with a lower risk of depression among Spanish adults. If the potential influence of the Mediterranean diet is removed, the Alternative Health Eating diet demonstrates a much weaker inverse association. There does not appear to be a dose-response relationship, rather a threshold pattern was observed, with the biggest risk reduction occurring between the low and moderate adherence score groups. |
| Chocano-Bedoya 2013                               | n = 50,605 participants from the Nurses'                                                                                                                                                                                        | Participants completed a condensed FFQ at baseline, followed by an expanded FFQ every four years                                                                                                                                                                                                                                                                                                                                                   | The development of the dietary patterns involves some arbitrary decisions. Self-report of both                                                                                                                                                                      | This study does not demonstrate a clear association between risk of depression and dietary patterns.                                                                                                                                                                                                                                                                                                                                                                        |

1  
2  
3  
4  
5  
6  
7  
8  
9  
10  
11  
12  
13  
14  
15  
16  
17  
18  
19  
20  
21  
22  
23  
24  
25  
26  
27  
28  
29  
30  
31  
32  
33  
34  
35  
36  
37  
38  
39  
40  
41  
42  
43  
44  
45  
46  
47

| Study and design                    | Participants                                                                                                                                            | Methods                                                                                                                                                                                                                                                                                                                                          | Limitations                                                                                                                                                                                                                                                                                                              | Conclusions                                                                                                                                                                                                                |
|-------------------------------------|---------------------------------------------------------------------------------------------------------------------------------------------------------|--------------------------------------------------------------------------------------------------------------------------------------------------------------------------------------------------------------------------------------------------------------------------------------------------------------------------------------------------|--------------------------------------------------------------------------------------------------------------------------------------------------------------------------------------------------------------------------------------------------------------------------------------------------------------------------|----------------------------------------------------------------------------------------------------------------------------------------------------------------------------------------------------------------------------|
| Prospective cohort study            | Health Study, without depression at baseline.                                                                                                           | thereafter, between 1980 and 2000. Dietary patterns were evaluated to assess adherence to a prudent or Western dietary pattern. In 2000, participants were asked about antidepressant use and physician-diagnosed depression. Dietary patterns were then assessed for association with depression, with relevant covariates considered.          | diet and depression status may allow for some misclassification.                                                                                                                                                                                                                                                         |                                                                                                                                                                                                                            |
| Lehto 2013 Prospective cohort study | n = 2,317 Finnish men, aged 42-61y, from the Kuopio Ischemic Heart Disease Risk Factor study. Individuals did not have depressive symptoms at baseline. | Participants completed a four-day food record to assess zinc intake. Over 20 years of follow-up, participants who were hospitalized and received a discharge diagnosis of depression were noted, and zinc intake was compared for those who did and did not require a hospitalization.                                                           | The results may not be generalizable to women or patients with depression that does not warrant hospitalization.                                                                                                                                                                                                         | Zinc intake was not found to be associated with depression risk in middle-aged men. Low dietary zinc may not be a precursor to depression in this population.                                                              |
| Li 2011 Prospective cohort study    | n = 2,039 men and 3,029 women followed over 10.6 years. Participants were from the National Health and Nutrition Examination Survey.                    | Participants completed a FFQ based on the previous three months, and completed an assessment for severely depressed mood at baseline and at follow-up. Fish consumption was taken from the FFQ. First consumption was compared for those who did and did not develop severely depressed mood, with analysis accounting for potential covariates. | Limitations include potential bias related to loss-to-follow-up and participants who were excluded due to incomplete records. Assessing fish intake by a single FFQ may introduce errors in dietary assessment, and eating patterns may have changed during the follow-up period prior to the development of depression. | Fish consumption was inversely associated with severely depressed mood in men, but not in women. Further studies are needed to explore this connection, and differences between men and women.                             |
| Lucas 2011 Prospective cohort study | n = 54,632 women, 50-77y old with no depressive symptoms at baseline. Participants were from the Nurses' Health Study.                                  | Participants provided a FFQ for dietary information at four periods during the study. Over 10y of follow-up, incident cases of depression were reported. Diets were examined for consumption of n-3 and n-6 PUFA, linoleic acid and $\alpha$ -linoleic acid.                                                                                     | Due to similar food sources, there may be misclassification of linoleic and $\alpha$ -linoleic consumption. There could also be reverse causation occurring (depression altering diet) and other confounding factors, as well as misclassification of depression diagnosis.                                              | Data collected does not support a link between n-3 PUFA and depression. Higher $\alpha$ -linoleic acid and lower linoleic acid consumption may be associated with a lower depression risk, but further research is needed. |
| Oddy 2011                           | n = 1,407 participants from the Western                                                                                                                 | Adolescents completed a FFQ and the BDI for youth (BDI-Y) at 14y and                                                                                                                                                                                                                                                                             | FFQ data was self-reported, which may limit accuracy of food                                                                                                                                                                                                                                                             | Intake of saturated fat and n-3 PUFA was inversely related to depression                                                                                                                                                   |

| Study and design                                  | Participants                                                                                                                                      | Methods                                                                                                                                                                                                                                                                                           | Limitations                                                                                                                                                                                                                                                                                                                                                                                                                      | Conclusions                                                                                                                                                                                                                                                                                      |
|---------------------------------------------------|---------------------------------------------------------------------------------------------------------------------------------------------------|---------------------------------------------------------------------------------------------------------------------------------------------------------------------------------------------------------------------------------------------------------------------------------------------------|----------------------------------------------------------------------------------------------------------------------------------------------------------------------------------------------------------------------------------------------------------------------------------------------------------------------------------------------------------------------------------------------------------------------------------|--------------------------------------------------------------------------------------------------------------------------------------------------------------------------------------------------------------------------------------------------------------------------------------------------|
| Prospective cohort study                          | Australian Pregnancy Cohort, participants were adolescents aged 14y at first measurement and 17y at final measurement.                            | again at 17 years. Intake of saturated fat, n-3 PUFA, and other dietary and lifestyle factors, were compared to depression scores.                                                                                                                                                                | intake data. Taking depression data only from patient self-report, without parental report, may have underestimated rates of depression in the sample. Participants in study are more likely to be socioeconomically advantaged than the general population, limiting generalizability of results.                                                                                                                               | symptoms. However, these relationships did not remain when total energy intake and other lifestyle factors were accounted for. Previous associations between depression and n-3 PUFA could be due to confounding factors among other dietary and lifestyle factors.                              |
| Sanchez-Villegas 2011<br>Prospective cohort study | n = 12,059 participants free of depression at baseline. Part of the SUN Project.                                                                  | At baseline, participants completed a FFQ to assess dietary SFA, TFA, MUFA, PUFA and culinary fats. Incident cases of depression were reported at follow-up, and participants were assessed based on quintiles of fat intake.                                                                     | Single assessment of dietary intake limits the level of analysis possible. Depression cases were self-reported.                                                                                                                                                                                                                                                                                                                  | Higher TFA intake was associated with increased depression risk, and an inverse association was found between MUFA, PUFA, and olive oil intake and depression risk. Authors suggest that depression and cardiovascular disease may share nutritional determinants with relation to fat subtypes. |
| Colangelo 2009<br>Prospective cohort study        | n = 3,317 men and women in the Coronary Artery Risk Development in Young Adults study. Participants with bipolar disorder at entry were excluded. | Data on diet were collected at baseline, at 7y and 20y by FFQ. Depressive symptoms were assessed at 10y, 15y, and 20y. Other covariates were collected at 10y and 20y. Dietary data were assessed to determine consumption of fish, EPA, and DHA in comparison to depressive symptom development. | Dietary data was collected at 7y but not 10y, when depressive data was collected. This may weaken associations between diet and depressive symptoms. The tool used to assess depression may be weaker than clinical interviews, and participants who were excluded from the analysis had less favourable characteristics at baseline, such as smoking, alcohol consumption, and education, which may influence depression rates. | Intake of fish and sources of n-3 fatty acids may be associated inversely with development of chronic depressive symptoms in women. The same relationship was not demonstrated for men in this cohort.                                                                                           |
| Sanchez-Villagas 2009<br>Prospective cohort study | n = 10,094 participants without depressive symptoms at baseline. Part of the SUN Study.                                                           | Participants answered a FFQ to assess adherence to a Mediterranean diet pattern. At follow-up, incident depression was measured, and compared to Mediterranean diet adherence.                                                                                                                    | Lack of control for potential confounding factors may limit the interpretation of these results. The possibility for reverse causality exists, and the method used to determine                                                                                                                                                                                                                                                  | The Mediterranean dietary pattern may have a protective effect against depressive symptoms. Additional longitudinal studies are required to confirm these findings.                                                                                                                              |

| Study and design                                            | Participants                                                                                                                | Methods                                                                                                                                                                                                                                                                                  | Limitations                                                                                                                                                                                                                                       | Conclusions                                                                                                                                                                                                                                                                                                                                       |
|-------------------------------------------------------------|-----------------------------------------------------------------------------------------------------------------------------|------------------------------------------------------------------------------------------------------------------------------------------------------------------------------------------------------------------------------------------------------------------------------------------|---------------------------------------------------------------------------------------------------------------------------------------------------------------------------------------------------------------------------------------------------|---------------------------------------------------------------------------------------------------------------------------------------------------------------------------------------------------------------------------------------------------------------------------------------------------------------------------------------------------|
| clinical depression may have resulted in misclassification. |                                                                                                                             |                                                                                                                                                                                                                                                                                          |                                                                                                                                                                                                                                                   |                                                                                                                                                                                                                                                                                                                                                   |
| <b>Reviews: Exercise and depression</b>                     |                                                                                                                             |                                                                                                                                                                                                                                                                                          |                                                                                                                                                                                                                                                   |                                                                                                                                                                                                                                                                                                                                                   |
| Netz 2017<br>Systematic review                              | n = NR participants from NR studies, adults with depression.                                                                | PubMed was searched up to 2016 for RCTs and meta-analyses and systematic reviews. Studies examined exercise as a treatment for depression, compared to or alongside conventional pharmacological treatments.                                                                             | NR                                                                                                                                                                                                                                                | Majority of studies examining exercise for depression support exercise as a treatment for depression, at least as an adjunct to other forms of treatment. Additional longitudinal studies are required to examine exercise in real life settings, and more research is needed on dose-response for exercise and depression.                       |
| Radovic 2017<br>Systematic review                           | n = 297 participants from 8 included studies, mean ages 12-18y, diagnosed with depressive disorders or depressive symptoms. | Meta-analysis using random effects model. Multiple databases were searched up to 30 January 2015, with duplicate quality assessment. Participants had to receive an intervention of any type of exercise, compared to a control, and depressive symptoms were measured before and after. | High level of between-study heterogeneity, meaning summary effect should be considered with caution. Included studies were generally of low quality, and with a range of control and comparison groups, and the total number of studies is small. | Exercise appears to be effective at improving depressive symptoms among adolescents with clinical depression. Exercise is a low risk treatment, which may have other positive health effects. Exercise will most likely contribute to existing treatments, such as psychotherapy or pharmacotherapy.                                              |
| Carter 2016<br>Systematic review                            | n = 1,449 participants from 11 included studies. Participants were adolescents (13-17y) with depression.                    | Multiple databases and reference lists were searched up to April 2014. RCTs and Non-RCTs were included, and meta-analysis was performed on eight of the included studies. Included studies enrolled participants in a physical activity intervention.                                    | Cannot present a firm recommendation on type and intensity of exercise as a treatment for adolescents due to a limited number of trials.                                                                                                          | Exercise appears to improve symptoms of depression in adolescents. Suggestion for clinical guidance includes supervised light-to-moderate exercise three times per week for 6-12 weeks. Larger trials with sufficient sample size to reduce bias are needed to examine the dose-response relationship for exercise as a treatment for depression. |
| Gartlehner 2016<br>Systematic review                        | n = NR participants from 45 trials. Participants were adult outpatients with major depressive disorder.                     | Multiple databases were searched up to September 2015 for trials examining multiple types of complementary and alternative medicine techniques, as well as exercise, as first and second line intervention for major depressive                                                          | Confidence in the evidence is limited by high drop out rates in the included studies, inequalities in dosing, small sample sizes, and poor adverse event reporting.                                                                               | Studies comparing exercise to antidepressants found no difference in remission rates. Studies examining exercise as an add-on treatment with antidepressants presented mixed results, with one finding no difference and the second showing significant                                                                                           |

| Study and design                  | Participants                                                                                 | Methods                                                                                                                                                                                                                                                                                                                                                                                        | Limitations                                                                                                                                                                                                                                                                                                                                                                                          | Conclusions                                                                                                                                                                                                                                                                                                                             |
|-----------------------------------|----------------------------------------------------------------------------------------------|------------------------------------------------------------------------------------------------------------------------------------------------------------------------------------------------------------------------------------------------------------------------------------------------------------------------------------------------------------------------------------------------|------------------------------------------------------------------------------------------------------------------------------------------------------------------------------------------------------------------------------------------------------------------------------------------------------------------------------------------------------------------------------------------------------|-----------------------------------------------------------------------------------------------------------------------------------------------------------------------------------------------------------------------------------------------------------------------------------------------------------------------------------------|
| Kvam 2016<br>Systematic review    | n = 977 participants from 23 RCTs, adults ≥18y with a depression diagnosis.                  | disorder, compared to antidepressants.<br>Meta-analysis, with random effects model, of RCTs. Articles were found through multiple database search and bibliography searches up to November 2014, and quality assessment was performed. Participants in included studies received an anaerobic intervention, alone or in combination with another depression treatment, or a control condition. | Effect estimate of exercise may have been over-estimated due to use of the largest clinical effect arm in the meta-analysis rather than largest dose. Included studies often had poor quality assessment, and there was high heterogeneity.                                                                                                                                                          | improvement in patients with both exercise and antidepressants.<br>Exercise was an effective treatment for depression when compared to no intervention. Effects were small and insignificant when compared to psychological or pharmacological treatments. It can be considered a viable treatment or adjunct treatment for depression. |
| Qaseem 2016<br>Systematic review  | n = NR patients in NR studies, patients were ≥18y with major depressive disorder.            | This paper presents a guideline, supported by a systematic review. Multiple databases were searched up to September 2015, identifying studies that compared pharmacologic treatment to non-pharmacologic treatment for adults with major depressive disorder.                                                                                                                                  | Limited data on population subgroups for treatments for depression, and insufficient evidence for many of the other treatments identified.                                                                                                                                                                                                                                                           | Overall recommendations of this guideline were to select cognitive behavioural therapy or antidepressants for treatment of major depressive disorder. For exercise specifically, low quality evidence found no difference in response to exercise compared to second generation antipsychotics, and no difference in remission.         |
| Rhyner 2016<br>Systematic review  | n = NR patients from 45 included studies. Patients were older adults (≥60y) with depression. | Meta-analysis of included studies, multiple databases searched up to January 2014, with manual search of identified article reference lists. Quality of primary studies was assessed. Included studies examined an exercise intervention compared to a non-exercise control treatment.                                                                                                         | Immediate outcome data was used, without longer term follow-up data presented. Grouping variables were dichotomized, which results in a loss of information (ex. Age as continuous but presented as older or younger). Some data was not possible to capture, around exercise program details, due to lack of reported information in the primary studies. Data was only coded by a single reviewer. | Exercise was associated with a significantly reduced depression score, with no difference between participant age, control group type, or exercise intervention type. This systematic review suggests that older people with depression symptoms can be effectively treated with exercise.                                              |
| Schuch 2016a<br>Systematic review | n = 267 participants from 8 RCTs, older people (≥60y) with depression.                       | Random-effects meta analysis of studies comparing exercise with control for older people with depression. Included studies found                                                                                                                                                                                                                                                               | With only eight included studies, some subgroups were very small. All included studies had a small number of participants,                                                                                                                                                                                                                                                                           | Exercise was associated with a large and significant antidepressant effect in the study population. Moderate intensity exercise, mixed aerobic and                                                                                                                                                                                      |

1  
2  
3  
4  
5  
6  
7  
8  
9  
10  
11  
12  
13  
14  
15  
16  
17  
18  
19  
20  
21  
22  
23  
24  
25  
26  
27  
28  
29  
30  
31  
32  
33  
34  
35  
36  
37  
38  
39  
40  
41  
42  
43  
44  
45  
46  
47

| Study and design                         | Participants                                                                                                       | Methods                                                                                                                                                                                                                                                                                                                                                   | Limitations                                                                                                                          | Conclusions                                                                                                                                                                                                                                                                                                                           |
|------------------------------------------|--------------------------------------------------------------------------------------------------------------------|-----------------------------------------------------------------------------------------------------------------------------------------------------------------------------------------------------------------------------------------------------------------------------------------------------------------------------------------------------------|--------------------------------------------------------------------------------------------------------------------------------------|---------------------------------------------------------------------------------------------------------------------------------------------------------------------------------------------------------------------------------------------------------------------------------------------------------------------------------------|
|                                          |                                                                                                                    | via a Cochrane review published in 2013 and a multiple database search from 2013 to 1 August 2015. Results were adjusted for publication bias. Participants received an exercise intervention or a control condition.                                                                                                                                     | meaning that the subgroup analysis should only be considered a direction for future research and should be considered with caution.  | strength programs, in participants without major comorbidities showed the greatest improvement in depressive symptoms.                                                                                                                                                                                                                |
| Schuch 2016b<br>Systematic review        | n = 1,487 participants from 30 RCTs, participants were adults with primary diagnosis of major depressive disorder. | Included studies were found via a Cochrane review published in 2013 and a multiple database search to capture studies published after that review, up to 1 August 2015. Meta-analysis was performed, with adjustment for publication bias. Participants received an exercise intervention, or control, and had depressive symptoms measured pre and post. | NR                                                                                                                                   | The antidepressant effect of exercise is large and significant, even in those people with major depressive disorder. Reviews showing a lesser effect may have underestimated the benefits due to publication bias, which this review has accounted for. Data strongly support exercise as an evidence-based treatment for depression. |
| de Souza Moura 2015<br>Systematic review | n = 1,570 patients from 13 included studies, containing adults aged 18-60y with depression.                        | Authors searched multiple databases up to 20 June 2014, examining aerobic exercise compared to other types of exercise and other depression treatments. Risk of bias was assessed for each included study.                                                                                                                                                | Methodological and program heterogeneity limit the ability to make practical recommendations about aerobic exercise program details. | Aerobic exercise contributed to an improvement in depression symptoms in over half of the included studies (69.3%), with the remaining 30.7% showing physiological improvements without change to depressive symptoms.                                                                                                                |
| Meekums 2015<br>Systematic review        | n = 147 participants from 3 included studies, made up of adults and adolescents with depression.                   | Multiple databases were searched to 2 October 2014 for RCTs studying dance movement therapy for depression. Meta-analysis and risk of bias (Cochrane) assessment were completed.                                                                                                                                                                          | Low quality evidence limits the ability to draw conclusions.                                                                         | Three small trials with low quality evidence did not allow for firm conclusions about dance movement therapy as a treatment for depression. Larger, high quality studies are required.                                                                                                                                                |
| Ranjbar 2015<br>Systematic review        | n = NR participants from NR studies, with depression.                                                              | Multiple databases were searched to October 2014, looking at the effects of exercise on depression.                                                                                                                                                                                                                                                       | Methodological weakness and inconsistencies in included studies require caution when interpreting conclusions.                       | Evidence shows that exercise may benefit patients, specifically those ≤20y or ≥40y, with higher educational and physical status, females, untrained patients, and those with mild to moderate depression.                                                                                                                             |
| Josefsson 2014<br>Systematic review      | n = 720 participants included in meta-analysis (from 13/15 included studies).                                      | Multiple databases were searched for publications examining exercise interventions compared to no treatment, placebo, or usual care, up                                                                                                                                                                                                                   | NR                                                                                                                                   | While it is difficult to determine how effective exercise is in depressive symptom reduction, this study recommends exercise for people with                                                                                                                                                                                          |



| Study and design                     | Participants                                                                                     | Methods                                                                                                                                                                                                                                                 | Limitations                                                                                                                                                                                | Conclusions                                                                                                                                                                                                                                                                                                                                                                                    |
|--------------------------------------|--------------------------------------------------------------------------------------------------|---------------------------------------------------------------------------------------------------------------------------------------------------------------------------------------------------------------------------------------------------------|--------------------------------------------------------------------------------------------------------------------------------------------------------------------------------------------|------------------------------------------------------------------------------------------------------------------------------------------------------------------------------------------------------------------------------------------------------------------------------------------------------------------------------------------------------------------------------------------------|
|                                      | Participants had both clinical and nonclinical depression.                                       | to April 2012, with additional hand searching of specific journals. Meta analysis was performed and methodological quality of included studies was assessed.                                                                                            |                                                                                                                                                                                            | mild to moderate depression who are physically healthy and sufficiently willing and motivated to participate in an exercise program.                                                                                                                                                                                                                                                           |
| Mura 2014<br>Systematic review       | n = 1,101 participants from 13 included studies, diagnosed with depression.                      | Multiple databases were searched until April 2013 for studies examining exercise as an adjunct treatment to antidepressant medications, compared to standard treatment, no treatment, or placebo. Quality assessment of included studies was performed. | Included studies have a variety of methodological weaknesses which could devalue the results.                                                                                              | Exercise appears to be an effective strategy to improve the effect of antidepressant medications in major depressive disorder, and appears to be appropriately and safely used in a real-life context.                                                                                                                                                                                         |
| Park 2014<br>Systematic review       | n = NR patients with depression.                                                                 | Multiple databases searched for data on multiple complementary therapies for depression, for development of guideline evidence. Exercise compared to placebo or antidepressants was one question explored.                                              | Lack of evidence from studies conducted within Korea (for Korean guideline).                                                                                                               | Exercise can be recommended for adults with mild to moderate depression (strong evidence). Exercise therapy that is structured may be used as a non-pharmacological treatment for mild or moderate depression (extrapolated evidence).                                                                                                                                                         |
| Cooney 2013<br>Systematic review     | n = 2,326 participants from 39 included trials. Participants were adults with depression.        | Multiple databases were searched up to 13 July 2012 for RCTs comparing exercise to standard, no, or placebo treatment. Meta-analysis and risk of bias (Cochrane) assessment were completed.                                                             | Quality of some included studies is low, which limits confidence in the findings.                                                                                                          | Exercise was moderately more effective than control at reducing depressive symptoms when assessing all studies, with a smaller effect in methodologically rigorous studies. Exercise compared to psychological or pharmacological therapies is no more effective based on the small sample available.                                                                                          |
| Danielsson 2013<br>Systematic review | n = 1,139 participants from 14 included studies. Participants were adults with major depression. | Multiple databases were searched until August 2012 for studies containing depressive patients and an exercise intervention. Quality of the included evidence was assessed.                                                                              | Small number of included studies limits the interpretation of the results, as well as the heterogeneity in program length and follow-up measurements demonstrated in the included studies. | Exercise seems beneficial for depression, when combined with medication, with aerobic exercise showing no greater benefit than other types of physical activity. Previous studies have not addressed the potential risks of exercise, such as injuries or cardiac events, and further research is needed to determine the successful components of a physical activity regimen for depression. |



| Study and design                                                   | Participants                                                                                                                    | Methods                                                                                                                                                                                                                                                                                                      | Limitations                                                                                                                                                                    | Conclusions                                                                                                                                                                                                                                                                                                                  |
|--------------------------------------------------------------------|---------------------------------------------------------------------------------------------------------------------------------|--------------------------------------------------------------------------------------------------------------------------------------------------------------------------------------------------------------------------------------------------------------------------------------------------------------|--------------------------------------------------------------------------------------------------------------------------------------------------------------------------------|------------------------------------------------------------------------------------------------------------------------------------------------------------------------------------------------------------------------------------------------------------------------------------------------------------------------------|
| Mura 2013<br>Systematic review                                     | n = 1,318 participants from 10 studies. Participants were >60y with depression.                                                 | A single database was searched until January 2013 for RCTs on exercise as an adjunctive treatment for depressive symptoms in older adults. Quality assessment was carried out on the included studies.                                                                                                       | There is heterogeneity among intervention and control groups for exercise interventions, and general poor quality of studies in this group among older adults.                 | Due to a lack of high quality research, there have been few advances in the study of efficacy of exercise as a treatment for depression in older adults, over the past 20 years. The most promising results are found when exercise is combined with antidepressants in those with treatment-resistant late life depression. |
| Ravindran 2013<br>Systematic review                                | n = NR; participants with depression, anxiety, and bipolar disorder were examined.                                              | A single database was searched for publications examining multiple complementary and alternative therapies, up to December 2012, including exercise and yoga, as an add on for depression treatment.                                                                                                         | Heterogeneity between studies in form of exercise limit the interpretation of these results. Methodological weakness limits generalizability of yoga studies.                  | There is Level 3 evidence (prospective uncontrolled studies/case series/high quality retrospective studies) supporting exercise and/or yoga as an adjunct treatment for depression, along with pharmacotherapy.                                                                                                              |
| Herring 2012<br>Systematic review                                  | n = 10,534 patients from 90 included studies. Patients were sedentary adults with chronic disease.                              | Meta-regression of RCTs, multiple databases searched up to June 1, 2011, with manual search of reference lists. Quality of primary studies assessed. Participants in included studies had depression outcomes measured before and after an exercise program.                                                 | Analysis did not permit testing of the minimal/optimal effective dose for exercise program.                                                                                    | Exercise was found to reduce depressive symptoms in patients with chronic disease. The largest antidepressant effects were found in those with mild-to-moderate depression.                                                                                                                                                  |
| Shivakumar 2011<br>Systematic review                               | n = NR patients from NR studies, examining pregnant women with depression.                                                      | Systematic review of multiple publication types examining exercise during pregnancy and the impact on pregnant women with depressive symptoms, including publications up to January 2010.                                                                                                                    | NR                                                                                                                                                                             | There are no randomized trials of exercise for treatment of depression in pregnant women. Observational studies reported a reduction in anxiety and depression with regular exercise during pregnancy.                                                                                                                       |
| <b>Randomized controlled trials: Diet, exercise and depression</b> |                                                                                                                                 |                                                                                                                                                                                                                                                                                                              |                                                                                                                                                                                |                                                                                                                                                                                                                                                                                                                              |
| Serrano Ripoll 2015<br>RCT*                                        | n = 273 primary care patients ≥ 18 y, with depressive symptoms, received intervention or control, with follow up at 6 and 12 m. | Participants randomized to six months of following an active group intervention, advising on sleep patterns, 1h of walking per day, 2h sunlight exposure per day, and a healthy, balanced diet (specific recommendations included), or a control condition where the same four topics were mentioned without | Unable to monitor whether patients carried out recommendations. Interventions may be too difficult for depressed patients to carry out independent of support and supervision. | Participants in both groups had improved depression scores, with no significant difference between the two. Providing written lifestyle recommendations to depressive patients without support and supervision is not sufficient to provide benefit to the patients.                                                         |

| Study and design      | Participants                                       | Methods                                                                                                                                                                                                                                                                                                                                                                                                                                                                                                                              | Limitations                                                              | Conclusions                                                                                                             |
|-----------------------|----------------------------------------------------|--------------------------------------------------------------------------------------------------------------------------------------------------------------------------------------------------------------------------------------------------------------------------------------------------------------------------------------------------------------------------------------------------------------------------------------------------------------------------------------------------------------------------------------|--------------------------------------------------------------------------|-------------------------------------------------------------------------------------------------------------------------|
| Garcia-Toro 2012 RCT* | n = 80 nonseasonal depressive outpatients, ≥ 18 y. | specific recommendations (ex. participants instructed to do what they think would make them feel better).<br>Participants randomized to six months of following an active group intervention, advising on sleep patterns, 1h of walking per day, 2h sunlight exposure per day, and a healthy, balanced diet (specific recommendations included), or a control condition where the same four topics were mentioned without specific recommendations (i.e. participants instructed to do what they think would make them feel better). | Small sample size, poor homogeneity participants' of affective disorders | Lifestyle recommendations (sleep, exercise, sunlight exposure, diet) can effectively complement antidepressant therapy. |

BDI: Beck Depression Inventory; DASH diet: Dietary Approaches to Stop Hypertension diet; DHA: docosahexaenoic acid; EPA: eicosapentaenoic acid; ex.: example; FFQ: food frequency questionnaire; GI: Glycemic index; GL: glycemic load; h: hour; m: months; MUFA: monounsaturated fatty acids; n-3: omega-3; n-6: omega-6; NR: not reported; PUFA: omega-3/omega-6 polyunsaturated fatty acids; RCT: randomized controlled trial; SFA: saturated fatty acids; TFA: trans unsaturated fatty acids; y: years

\*Garcia-Toro 2012 is a pilot study of the same program being tested in Serrano Ripoll 2015

^Four narrative reviews are not included in the Appendix due to the quantity of SRs that provided a more in-depth analysis of the evidence on this topic.

**Q8. What are the functional, social, intellectual, physical and psychological problems experienced by children and teens living with an immediate family member who has depression?**

| Study / Included                                  | Participants                                                                                 | Methods                                                                                                                                                                                             | Limitations                                                                                                                                                                                                                                                                                            | Conclusions                                                                                                                                                                                                                                                                                                                                                                                                                                                                                                                                                                                                                                                                                                                                  |
|---------------------------------------------------|----------------------------------------------------------------------------------------------|-----------------------------------------------------------------------------------------------------------------------------------------------------------------------------------------------------|--------------------------------------------------------------------------------------------------------------------------------------------------------------------------------------------------------------------------------------------------------------------------------------------------------|----------------------------------------------------------------------------------------------------------------------------------------------------------------------------------------------------------------------------------------------------------------------------------------------------------------------------------------------------------------------------------------------------------------------------------------------------------------------------------------------------------------------------------------------------------------------------------------------------------------------------------------------------------------------------------------------------------------------------------------------|
| <b>Systematic Review with Meta-analysis</b>       |                                                                                              |                                                                                                                                                                                                     |                                                                                                                                                                                                                                                                                                        |                                                                                                                                                                                                                                                                                                                                                                                                                                                                                                                                                                                                                                                                                                                                              |
| Sui 2016                                          | n = 974 mothers with PND and n = 5596 mothers without PND from 9 prospective cohort studies. | Meta-analysis of prospective cohort studies reporting IQ among children of PND mothers and non-PND mothers for all years up to December 2013.                                                       | Among the included studies only one had a relatively large sample size and numbers in each of the subgroups was small; although the majority of the primary studies were high quality most did not adequately control for confounding factors; the method of diagnosing PND varied in primary studies. | Children of PND mothers had significantly lower full IQ scores than those of non-PND mothers (WMD = -4.384; 95%CI, -6.715 to -2.053; p = .001); heterogeneity across studies was marginally significant (I2 = 51.9%, p = .052); for verbal IQ the SMD between children of PND mothers and those of non-PND mothers was -0.361 (95% CI, -0.564 to -0.158; p< .001); no significant results were found for subgroup analysis of socioeconomic status, child's age at evaluation, study quality, or diagnostic method of postnatal depression.                                                                                                                                                                                                  |
| Goodman 2011                                      | n = 80,851 mother-child dyads from 193 prospective studies.                                  | Meta-analysis of studies presenting quantitative data on the association between maternal depression and the child outcomes of interest published between 1982 and 2009.                            | Minimal information about included studies; most studies sampled largely homogeneous, middle- and upper-middle income, predominantly Caucasian families; this meta-analysis does not address any causal associations.                                                                                  | Maternal depression was more strongly associated with children internalizing problems than with negative emotion/behaviour (g = .21, p< .001) or positive emotion/behaviour (g = .30, p< .001). Maternal depression was more strongly associated with their children's general psychopathology than with their externalizing problems (g = -.05, p< .01) and than their negative (g = .22, p< .001) and positive emotion/behaviour (g = .30, p< .001). Maternal depression was more strongly associated with externalizing problems than with negative (g = .17, p< .001) or positive affect/behaviour (g = .25, p< .001) and more strongly associated with negative affect/behaviour than with positive affect/behaviour (g = .08, p< .05). |
| <b>Systematic Review with Narrative Synthesis</b> |                                                                                              |                                                                                                                                                                                                     |                                                                                                                                                                                                                                                                                                        |                                                                                                                                                                                                                                                                                                                                                                                                                                                                                                                                                                                                                                                                                                                                              |
| Sanger 2015                                       | n = 13,199 families across 8 cohorts (16 studies) with a mean follow-up of 14 years.         | Narrative synthesis examining if maternal PND is associated with offspring psychological (cognitive, externalising, internalising, psychosocial, and psychiatric) outcomes up until September 2013. | Many of the primary studies reported relatively high drop-out rates at follow-up.                                                                                                                                                                                                                      | <i>Cognitive</i> (n=4 studies): overall studies found significant association between PND and cognitive outcomes (i.e., IQ scores, secondary school completion); <i>internalizing problems</i> (n=10), <i>externalizing problems</i> (n=7): studies found either weak or no significant results between PND and offspring internalizing and externalising problems; <i>psychopathology</i>                                                                                                                                                                                                                                                                                                                                                   |

|                |                                                                                            |                                                                                                                                                                                                                                                       |                                                                                                                                                                                                                                                                                                                                                                                                                                                                   |                                                                                                                                                                                                                                                                                                                                                                                                                                                                                                                                                                                                                                                             |
|----------------|--------------------------------------------------------------------------------------------|-------------------------------------------------------------------------------------------------------------------------------------------------------------------------------------------------------------------------------------------------------|-------------------------------------------------------------------------------------------------------------------------------------------------------------------------------------------------------------------------------------------------------------------------------------------------------------------------------------------------------------------------------------------------------------------------------------------------------------------|-------------------------------------------------------------------------------------------------------------------------------------------------------------------------------------------------------------------------------------------------------------------------------------------------------------------------------------------------------------------------------------------------------------------------------------------------------------------------------------------------------------------------------------------------------------------------------------------------------------------------------------------------------------|
|                |                                                                                            |                                                                                                                                                                                                                                                       |                                                                                                                                                                                                                                                                                                                                                                                                                                                                   | (n=2): no significant associations were found between exposure to maternal PND and offspring DSM-IV psychiatric diagnoses (depression, anxiety, ODD, CD, ADHD, bipolar disorder, eating disorders, and psychosis) at follow-up (OR=1.25, 95 % CI=0.51–3.10); offspring of mothers with PND were four times more likely to meet a psychiatric diagnosis than offspring in the control group (OR=4.0, p<.01); <i>psychosocial development</i> (n=2): PND was associated with lower offspring Social Competence scores at 16 years; female offspring who were exposed to PND experienced elevated levels of emotional sensitivity at age 13 (F=10.73, p=0.01). |
| Waters 2014    | n = 40,843 mothers from 26 prospective studies.                                            | Narrative synthesis of primary studies assessing the impact of antenatal depression on children's cognitive, behavioural, emotional, psychiatric, neuroendocrine, nervous system, and brain-related outcomes; searched all years up to December 2013. | Common methodological problem of the included studies is the reliance on mothers' reports of variables, potentially giving rise to biased maternal reports of child outcomes; inconsistent findings in studies likely reflect methodological differences between studies as well as other limitations including sampling problems, measurement inconsistencies, and variability across studies regarding the presence of unmeasured residual confounding factors. | A consistent finding that antenatal depression effected children's conduct problems and antisocial behaviour, with adverse offspring outcomes demonstrated in infancy, childhood and adolescence; for cognitive outcomes the results are contradictory, reporting either no effect or small effects that attenuate following adjustment for other antenatal or postnatal risk factors; women who are depressed during pregnancy and their children are typically exposed to multiple risk factors.                                                                                                                                                          |
| Lampard 2014   | n = 59,658 children across 7 cohorts (9 studies) with a follow-up range from 1 – 12 years. | Narrative synthesis examining prospective studies on the association between maternal episodic and chronic depression and child weight outcomes, for all years up to January 2013.                                                                    | Heterogeneity in the results for BMI and indicators of adiposity; across included studies, the ascertainment of exposure to maternal depression was weak.                                                                                                                                                                                                                                                                                                         | Episodic maternal depression and risk for child overweight or obesity failed to observe an effect; results suggest that chronic depression may play an important role in a child being overweight.                                                                                                                                                                                                                                                                                                                                                                                                                                                          |
| Hendricks 2012 | n = 8,455 parent/child dyads from 13 cohort and cross-sectional studies with a mean        | Narrative synthesis and qualitative thematic analysis, included articles with relevance to maternal depression and early childhood aggression (age 0-6)                                                                                               | Difficult to control for many confounders in primary studies; many of the studies included diverse populations.                                                                                                                                                                                                                                                                                                                                                   | Found that when maternal depression exists, early childhood aggression is more likely to occur; mothers with depression exhibited forms of negative parenting behaviours including emotional withdrawal, maternal                                                                                                                                                                                                                                                                                                                                                                                                                                           |

1  
2  
3  
4  
5  
6  
7  
8  
9  
10  
11  
12  
13  
14  
15  
16  
17  
18  
19  
20  
21  
22  
23  
24  
25  
26  
27  
28  
29  
30  
31  
32  
33  
34  
35  
36  
37  
38  
39  
40  
41  
42  
43  
44  
45  
46  
47

|              |                                                                                                                                              |                                                                                           |                                                                                                                                       |                                                                                                                                                                                                                                                                                                                               |
|--------------|----------------------------------------------------------------------------------------------------------------------------------------------|-------------------------------------------------------------------------------------------|---------------------------------------------------------------------------------------------------------------------------------------|-------------------------------------------------------------------------------------------------------------------------------------------------------------------------------------------------------------------------------------------------------------------------------------------------------------------------------|
|              | follow-up of 23 months to 5 years.                                                                                                           | and empirical studies with a sample size greater than 50; searched between 2000 and 2010. |                                                                                                                                       | intolerance and irritability; all of the articles agree that internal and external influencing factors mediate the relationship between child-bearing depression and early childhood aggression.                                                                                                                              |
| Corriea 2007 | NR; 19 studies (cross-sectional and prospective longitudinal) primarily focused on maternal anxiety with 4 reporting on maternal depression. | Narrative synthesis, included all study designs between 1998 and 2003.                    | Full text reviewed only for articles that could be found in Brazil libraries; few details on included study characteristics provided. | In children at four years of age parental pre- and postnatal depression was responsible for increasing the mean rate of behavioural and emotional problems; findings from one study indicate that maternal anxiety/depression appear as risk factors for the development of psychopathologies during the child's adolescence. |

CI: confidence interval; IQ: intelligence quotient; NR: not reported; ns: not statistically significant; OR: odds ratio; PND: post-natal depression; RCT: randomised controlled trial; RR: risk ratio; SMD: standard mean difference; UK: United Kingdom; US: United States; WMD: weighted mean difference; y: years

For peer review only

1  
2  
3 **Q9. What interventions are effective in preventing and treating workplace depression and reducing stigma associated with depression**  
4 **in the workplace?**

| 5 Study and design                         | 6 Participants                                                                                                                                                | 7 Methods                                                                                                                                                             | 8 Limitations                                                                                                                                                                                                                                 | 9 Conclusions                                                                                                                                                                                                                                                                                                                                                                                                                                                                                                                                                                                                                                                                                                                                                                                          |
|--------------------------------------------|---------------------------------------------------------------------------------------------------------------------------------------------------------------|-----------------------------------------------------------------------------------------------------------------------------------------------------------------------|-----------------------------------------------------------------------------------------------------------------------------------------------------------------------------------------------------------------------------------------------|--------------------------------------------------------------------------------------------------------------------------------------------------------------------------------------------------------------------------------------------------------------------------------------------------------------------------------------------------------------------------------------------------------------------------------------------------------------------------------------------------------------------------------------------------------------------------------------------------------------------------------------------------------------------------------------------------------------------------------------------------------------------------------------------------------|
| 10 <b>Main outcome measure: Depression</b> |                                                                                                                                                               |                                                                                                                                                                       |                                                                                                                                                                                                                                               |                                                                                                                                                                                                                                                                                                                                                                                                                                                                                                                                                                                                                                                                                                                                                                                                        |
| 11 Joyce 2016<br>12 Meta-review            | 13 N=NR, 20 reviews<br>14 (481 primary<br>15 studies).                                                                                                        | 16 Synthesis of SRs of<br>17 effectiveness of workplace<br>18 mental health interventions for<br>19 anxiety and depression.                                           | 20 Exclusion of occupation<br>21 specific reviews, studies had<br>22 small sizes in the treatment<br>23 groups and there was a lack<br>24 of randomization.                                                                                   | 25 Primary prevention strategies of increased<br>26 employee control and promotion of physical<br>27 activity appear to enhance well-being and<br>28 reduce symptoms of depression and anxiety<br>29 (moderate evidence). Impact of primary<br>30 prevention strategies on work-related outcomes<br>31 is unknown.<br>32 CBT-stress management as a secondary<br>33 intervention reduces the impact of work stress<br>34 (strong evidence) while there is strong<br>35 evidence <i>against</i> psychological debriefing.<br>36 There is moderate evidence supporting tertiary<br>37 interventions with a specific focus on the<br>38 workplace, such as CBT and exposure therapy<br>39 for improving individual outcomes, but mixed<br>40 results for work-related outcomes such as<br>41 absenteeism. |
| 42 Tan 2014<br>43 Systematic review        | 44 N=2501 patients<br>45 from 9 RCTs.                                                                                                                         | 46 Pooled meta-analysis of RCTs of<br>47 work place interventions aimed<br>48 at preventing the development of<br>49 depression.                                      | 50 There were not enough<br>51 studies to make direct<br>52 comparisons on which type<br>53 of intervention is most<br>54 effective. No studies had a<br>55 non-depressed sample at<br>56 baseline and are not true<br>57 prevention studies. | 58 There is good quality evidence that universally<br>59 delivered workplace interventions targeting<br>60 mental health can reduce depression<br>61 symptoms among workers. There is more<br>62 evidence for the effectiveness of CBT-based<br>63 programs than other interventions.                                                                                                                                                                                                                                                                                                                                                                                                                                                                                                                  |
| 64 Chu 2014<br>65 Systematic review        | 66 N=2025 patients<br>67 from 17 studies (13<br>68 RCTs, 2<br>69 comparison trials, 2<br>70 controlled trials); 2<br>71 RCTs were on<br>72 depression (N=71). | 73 Narrative synthesis of studies<br>74 examining the effectiveness of<br>75 workplace physical activity<br>76 interventions on depression,<br>77 stress and anxiety. | 78 Outcome measurements for<br>79 depression were inconsistent<br>80 across studies.                                                                                                                                                          | 81 Workplace physical activity programs in<br>82 combination with a behavior modification<br>83 program can significantly reduce depression<br>84 scores, while exercise training alone improves<br>85 depression scores but not significantly.                                                                                                                                                                                                                                                                                                                                                                                                                                                                                                                                                        |
| 86 Dietrich 2012<br>87 Systematic review   | 88 N=9743 employees<br>89 in 1 quasi-<br>90 experimental study,<br>91 n=667 had<br>92 depression.                                                             | 93 Narrative summary of existing<br>94 evidence-based prevention<br>95 strategies for depression in the<br>96 workplace.                                              | 97 No randomization,<br>98 intervention was for staff on<br>99 sick leave, only one study.                                                                                                                                                    | 100 Providing psychoeducation along with the<br>101 diagnosis of depression significantly decreases<br>102 symptom severity and improves remission<br>103 rates. Men over the age of 40 appear to benefit<br>104 more from this intervention than persons under<br>105 40, especially women.                                                                                                                                                                                                                                                                                                                                                                                                                                                                                                           |

1  
2  
3  
4  
5  
6  
7  
8  
9  
10  
11  
12  
13  
14  
15  
16  
17  
18  
19  
20  
21  
22  
23  
24  
25  
26  
27  
28  
29  
30  
31  
32  
33  
34  
35  
36  
37  
38  
39  
40  
41  
42  
43  
44  
45  
46  
47

|                                          |                                                                              |                                                                                                                                                                                                                                                      |                                                                                                        |                                                                                                                                                                                                                             |
|------------------------------------------|------------------------------------------------------------------------------|------------------------------------------------------------------------------------------------------------------------------------------------------------------------------------------------------------------------------------------------------|--------------------------------------------------------------------------------------------------------|-----------------------------------------------------------------------------------------------------------------------------------------------------------------------------------------------------------------------------|
| Martin 2009<br>Systematic review         | N=2640 adults in 17 studies (14 RCTs and 3 quasi-experimental studies).      | Meta-analysis on the impact of workplace health promotion interventions on depressive symptoms.                                                                                                                                                      | High heterogeneity between populations and interventions.                                              | A variety of direct and indirect workplace health promotion interventions appear to have a small effect on decreasing depression symptoms.                                                                                  |
| <b>Main outcome measure: absenteeism</b> |                                                                              |                                                                                                                                                                                                                                                      |                                                                                                        |                                                                                                                                                                                                                             |
| Nieuwenhuijsen 2014<br>Systematic review | N=5996 patients from 23 studies, 5 were work-directed interventions (N=544). | Pooled analysis of RCTs and cluster RCTs of interventions aimed at reducing work disability in employees with depression. Work-directed interventions included modified work duties or hours and/or supporting the worker in coping with depression. | Two of the five work-directed studies were rated as a high risk of bias.                               | Adding a work-directed intervention to a clinical depression intervention has a positive effect on sickness absences (moderate evidence) in the medium term. Similar effects on depressive symptoms could not be confirmed. |
| Furlan 2012<br>Systematic review         | N=NR, adults in 14 articles from 10 RCTs and 2 NRS.                          | Narrative summary of existing workplace interventions to manage depression determined by work-related outcomes such as absenteeism.                                                                                                                  | All included studies had a high risk of bias and GRADED as very low quality evidence for all outcomes. | Insufficient evidence to determine effectiveness of workplace interventions to manage depression.                                                                                                                           |

CBT: cognitive behavioural therapy, NR: not reported, NRS: non-randomized study, RCT: randomized control trial, SR: systematic review



**Q10. Are there structural or functional changes in brains due to antidepressant therapy during brain development (in children)?**

| Study and design                     | Participants        | Methods                                                                                                                                                           | Limitations                                                                                                                                                                                                 | Conclusions                                                                                                                                                                                            |
|--------------------------------------|---------------------|-------------------------------------------------------------------------------------------------------------------------------------------------------------------|-------------------------------------------------------------------------------------------------------------------------------------------------------------------------------------------------------------|--------------------------------------------------------------------------------------------------------------------------------------------------------------------------------------------------------|
| Cousins 2015<br>Review               | NA                  | Narrative review of selected publications relating to neurodevelopment during adolescence and the effects of antidepressants on the adolescent brain.             | Selected review, only addresses the serotonin reuptake inhibitor (SSRI) fluoxetine and not escitalopram due to licensing differences in this population between the UK (country of authorship) and the USA. | Studies on the effects of antidepressants on the brain of adolescents have been mainly based on animal models and suggest an age-dependent response. Only referenced one human study (Tao 2012 below). |
| Tao 2012<br>Prospective cohort study | n = 15 adolescents. | Measured brain activation in response to changing negative facial expressions in depressed adolescents being treated with fluoxetine compared to normal controls. | Patients with comorbid psychiatric disorders such as anxiety were included which may confound results. Responses to positive emotions were not evaluated.                                                   | Brain activity normalized in the depressed adolescents after 8 weeks of treatment with fluoxetine.                                                                                                     |

NA: not applicable, UK: United Kingdom, USA: United States of America

**Q11. What is the role of the family in the treatment and trajectory of depression?**

| Study and design                            | Participants                                                                                           | Methods                                                                                                                                                                     | Limitations                                                                                                                                                                                           | Conclusions                                                                                                                                                                                                                          |
|---------------------------------------------|--------------------------------------------------------------------------------------------------------|-----------------------------------------------------------------------------------------------------------------------------------------------------------------------------|-------------------------------------------------------------------------------------------------------------------------------------------------------------------------------------------------------|--------------------------------------------------------------------------------------------------------------------------------------------------------------------------------------------------------------------------------------|
| <b>Main diagnosis: Depression</b>           |                                                                                                        |                                                                                                                                                                             |                                                                                                                                                                                                       |                                                                                                                                                                                                                                      |
| Brady 2017 Systematic review                | N= 928 patients with MDD ages 14-85 yrs from 9 studies (10 articles-7 RCTs, 3 within-subject studies). | Narrative synthesis of RCTs and within-subject studies of the evidence for family psychoeducation (FPE) for MDD.                                                            | Population restricted to 14 years and older and only articles and abstracts published in peer-reviewed journals.                                                                                      | Current evidence suggests that FPE interventions lead to improved outcomes for patients and improved well-being for their families (carers). Multi-family FPE is at least as effective and single family FPE for improving outcomes. |
| Stahl 2016 Systematic review                | N= 1870 adults >60 yrs from 10 studies.                                                                | Narrative synthesis of RCTs of interventions that target both a patient with depression and their support person (dyadic interventions).                                    | Majority of studies compared dyadic intervention with usual care rather than single vs. dyadic interventions. Not all patients met the CES-D criteria for clinically significant depressive symptoms. | Dyadic interventions can decrease symptoms with medium effect sizes in patients with MDD and small effect sizes in patients with depressive symptoms.                                                                                |
| Meis 2013 Systematic review                 | Adults from 39 studies (51 RCTs), only 1 (n=35) was on depression.                                     | Narrative synthesis of RCTs of family interventions for adult mental health conditions.                                                                                     | Only 1 RCT (n=35) addressed patients with depression.                                                                                                                                                 | The single RCT on depression found brief couple therapy significantly improved depression symptoms compared to patients on a waitlist with a low strength of evidence.                                                               |
| Henken 2007 Systematic review               | N= 519 patients of all ages from 6 studies.                                                            | Narrative synthesis of RCTs of different types of family therapy and their association with depression symptom levels.                                                      | Available evidence was too heterogeneous and scarce to determine the effectiveness of family therapy on depressive symptoms.                                                                          | Family therapy appears to be more effective than no treatment however the certainty of its effectiveness is unclear.                                                                                                                 |
| <b>Main diagnosis: Cancer</b>               |                                                                                                        |                                                                                                                                                                             |                                                                                                                                                                                                       |                                                                                                                                                                                                                                      |
| Wang 2017 Systematic Review                 | N= 697 adults diagnosed with cancer in 6 studies (6 additional studies did not address depression).    | Meta-analysis of RCTs of the impact of couples therapy on Quality of Life scores of cancer patients and their spouses.                                                      | Small number of studies with significant heterogeneity between studies, results should be considered preliminary.                                                                                     | Couple-based intervention revealed significant improvements in depression scores with psychoeducational interventions yielding larger effects than skill training.                                                                   |
| <b>Main diagnosis: Stroke</b>               |                                                                                                        |                                                                                                                                                                             |                                                                                                                                                                                                       |                                                                                                                                                                                                                                      |
| Vallury 2015 <sup>4</sup> Systematic Review | N=3739 adult stroke survivors in 25 studies.                                                           | Narrative synthesis of RCTs and quasi-experimental designs of the available evidence regarding family-oriented interventions to prevent and manage depression after stroke. | All relevant studies were included regardless of bias or quality, over half had some risk of bias.                                                                                                    | Family-oriented interventions aimed at reducing post-stroke depression can be effective for both patients and caregivers.                                                                                                            |

CES-D: Center for Epidemiologic Studies Depression Scale FPE: Family psychoeducation MDD: Major Depressive Disorder RCT: randomized control trial

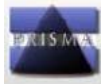

# PRISMA 2009 Checklist

| Section/topic                      | #  | Checklist item                                                                                                                                                                                                                                                                                              | Reported on page #                            |
|------------------------------------|----|-------------------------------------------------------------------------------------------------------------------------------------------------------------------------------------------------------------------------------------------------------------------------------------------------------------|-----------------------------------------------|
| <b>TITLE</b>                       |    |                                                                                                                                                                                                                                                                                                             |                                               |
| Title                              | 1  | Identify the report as a systematic review, meta-analysis, or both.                                                                                                                                                                                                                                         | Pg1, line 2                                   |
| <b>ABSTRACT</b>                    |    |                                                                                                                                                                                                                                                                                                             |                                               |
| Structured summary                 | 2  | Provide a structured summary including, as applicable: background; objectives; data sources; study eligibility criteria, participants, and interventions; study appraisal and synthesis methods; results; limitations; conclusions and implications of key findings; systematic review registration number. | Pg2, line 26                                  |
| <b>INTRODUCTION</b>                |    |                                                                                                                                                                                                                                                                                                             |                                               |
| Rationale                          | 3  | Describe the rationale for the review in the context of what is already known.                                                                                                                                                                                                                              | Pg4, line 67                                  |
| Objectives                         | 4  | Provide an explicit statement of questions being addressed with reference to participants, interventions, comparisons, outcomes, and study design (PICOS).                                                                                                                                                  | Pg5, line 99                                  |
| <b>METHODS</b>                     |    |                                                                                                                                                                                                                                                                                                             |                                               |
| Protocol and registration          | 5  | Indicate if a review protocol exists, if and where it can be accessed (e.g., Web address), and, if available, provide registration information including registration number.                                                                                                                               | NA                                            |
| Eligibility criteria               | 6  | Specify study characteristics (e.g., PICOS, length of follow-up) and report characteristics (e.g., years considered, language, publication status) used as criteria for eligibility, giving rationale.                                                                                                      | Pg 6, line 128; Pg 7, Table 1; Pg 9, line 135 |
| Information sources                | 7  | Describe all information sources (e.g., databases with dates of coverage, contact with study authors to identify additional studies) in the search and date last searched.                                                                                                                                  | Pg 6, lines 120 & 128                         |
| Search                             | 8  | Present full electronic search strategy for at least one database, including any limits used, such that it could be repeated.                                                                                                                                                                               | Appendix 1                                    |
| Study selection                    | 9  | State the process for selecting studies (i.e., screening, eligibility, included in systematic review, and, if applicable, included in the meta-analysis).                                                                                                                                                   | Pg 9, line 135                                |
| Data collection process            | 10 | Describe method of data extraction from reports (e.g., piloted forms, independently, in duplicate) and any processes for obtaining and confirming data from investigators.                                                                                                                                  | Pg 9, line 142                                |
| Data items                         | 11 | List and define all variables for which data were sought (e.g., PICOS, funding sources) and any assumptions and simplifications made.                                                                                                                                                                       | Appendix 2                                    |
| Risk of bias in individual studies | 12 | Describe methods used for assessing risk of bias of individual studies (including specification of whether this was done at the study or outcome level), and how this information is to be used in any data synthesis.                                                                                      | Pg 9, line 144                                |

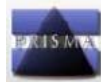

# PRISMA 2009 Checklist

Page 1 of 2

|                      |    |                                                                                                                                                           |                |
|----------------------|----|-----------------------------------------------------------------------------------------------------------------------------------------------------------|----------------|
| Summary measures     | 13 | State the principal summary measures (e.g., risk ratio, difference in means).                                                                             | Pg 9, line 148 |
| Synthesis of results | 14 | Describe the methods of handling data and combining results of studies, if done, including measures of consistency (e.g., $I^2$ ) for each meta-analysis. | NA             |

| Section/topic                 | #  | Checklist item                                                                                                                                                                                           | Reported on page #       |
|-------------------------------|----|----------------------------------------------------------------------------------------------------------------------------------------------------------------------------------------------------------|--------------------------|
| Risk of bias across studies   | 15 | Specify any assessment of risk of bias that may affect the cumulative evidence (e.g., publication bias, selective reporting within studies).                                                             | NA                       |
| Additional analyses           | 16 | Describe methods of additional analyses (e.g., sensitivity or subgroup analyses, meta-regression), if done, indicating which were pre-specified.                                                         | NA                       |
| <b>RESULTS</b>                |    |                                                                                                                                                                                                          |                          |
| Study selection               | 17 | Give numbers of studies screened, assessed for eligibility, and included in the review, with reasons for exclusions at each stage, ideally with a flow diagram.                                          | Pgs 16-24; Fig 2         |
| Study characteristics         | 18 | For each study, present characteristics for which data were extracted (e.g., study size, PICOS, follow-up period) and provide the citations.                                                             | Appendix 2               |
| Risk of bias within studies   | 19 | Present data on risk of bias of each study and, if available, any outcome level assessment (see item 12).                                                                                                | Appendix 2               |
| Results of individual studies | 20 | For all outcomes considered (benefits or harms), present, for each study: (a) simple summary data for each intervention group (b) effect estimates and confidence intervals, ideally with a forest plot. | a) Pgs. 16-24<br>b) NA   |
| Synthesis of results          | 21 | Present results of each meta-analysis done, including confidence intervals and measures of consistency.                                                                                                  | NA                       |
| Risk of bias across studies   | 22 | Present results of any assessment of risk of bias across studies (see Item 15).                                                                                                                          | NA                       |
| Additional analysis           | 23 | Give results of additional analyses, if done (e.g., sensitivity or subgroup analyses, meta-regression [see Item 16]).                                                                                    | NA                       |
| <b>DISCUSSION</b>             |    |                                                                                                                                                                                                          |                          |
| Summary of evidence           | 24 | Summarize the main findings including the strength of evidence for each main outcome; consider their relevance to key groups (e.g., healthcare providers, users, and policy makers).                     | Pg 24, line 354          |
| Limitations                   | 25 | Discuss limitations at study and outcome level (e.g., risk of bias), and at review-level (e.g., incomplete retrieval of identified research, reporting bias).                                            | Pg 27, line 419; Table 2 |
| Conclusions                   | 26 | Provide a general interpretation of the results in the context of other evidence, and implications for future research.                                                                                  | Pg 28, line 438          |

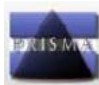

# PRISMA 2009 Checklist

|                |    |                                                                                                                                            |                 |
|----------------|----|--------------------------------------------------------------------------------------------------------------------------------------------|-----------------|
| <b>FUNDING</b> |    |                                                                                                                                            |                 |
| Funding        | 27 | Describe sources of funding for the systematic review and other support (e.g., supply of data); role of funders for the systematic review. | Pg 29, line 456 |

From: Moher D, Liberati A, Tetzlaff J, Altman DG, The PRISMA Group (2009). Preferred Reporting Items for Systematic Reviews and Meta-Analyses: The PRISMA Statement. PLoS Med 6(7): e1000097. doi:10.1371/journal.pmed1000097

For more information, visit: [www.prisma-statement.org](http://www.prisma-statement.org).

Page 2 of 2

For peer review only
