# Supplementary material for: Evidence available for patient-identified priorities in depression research: results of 11 rapid responses
Source: PubMed Central journal article supplement — BMJ Open. 2019 Jun 28;9(6):e026847. doi: 10.1136/bmjopen-2018-026847 (PMC6609077; doi:10.1136/bmjopen-2018-026847), 2019-06-28
Supplement: bmjopen-2018-026847supp001.pdf [file bmjopen-2018-026847supp001.pdf]

## APPENDIX 1: SEARCH STRATEGIES

### Depression Research Priority #: 1

**Priority:** Which treatment therapy or method is more successful for long term remission or recovery?

**Suggested review question (reviewer generated):** For patients with diagnosed depression, do pharmacotherapies (e.g., SSRIs) result in long term recovery/remission (e.g., cessation of drug therapy) compared with psychotherapy (e.g., CBT)?

**Date conducted:** 27 July 2017

**Database:** PubMed via NCBI Entrez (1946- )

**Records Retrieved:** 390

#### Strategy:

#1 Search ("Bipolar and Related Disorders"[Mesh] OR "Depression"[Mesh] OR "Depressive Disorder"[Mesh] OR "Mood Disorders"[Mesh:NoExp] OR affective disorder[tiab] OR affective disorders[tiab] OR bipolar[tiab] OR depression[tiab] OR depressive[tiab] OR depressives[tiab] OR manic disorder[tiab] OR manic disorders[tiab] OR mood disorder[tiab] OR mood disorders[tiab])

#2 Search ("Adrenergic Uptake Inhibitors"[Mesh] OR "Antidepressive Agents"[Mesh] OR "Bipolar and Related Disorders/drug therapy"[Mesh] OR "Depression/drug therapy"[Mesh] OR "Depressive Disorder/drug therapy"[Mesh] OR Fluvoxamine[Mesh] OR "Monoamine Oxidase Inhibitors"[Mesh] OR "Mood Disorders/drug therapy"[Mesh:NoExp] OR "Serotonin and Noradrenaline Reuptake Inhibitors"[Mesh] OR "Serotonin Uptake Inhibitors"[Mesh] OR anti-depressant[tiab] OR anti-depressants[tiab] OR anti-depressive agent[tiab] OR anti-depressive agents[tiab] OR antidepressant[tiab] OR antidepressants[tiab] OR antidepressive agent[tiab] OR antidepressive agents[tiab] OR fluvoxamine[tiab] OR MAOIs[tiab] OR monoamine oxidase inhibitors[tiab] OR serotonin reuptake inhibitor[tiab] OR serotonin reuptake inhibitors[tiab] OR SNRI[tiab] OR SNRIs[tiab] OR SSRI[tiab] OR SSRIs[tiab])

#3 Search ("Psychotherapy"[Mesh] OR behavioral therapy[tiab] OR behavioral therapies[tiab] OR behavioural therapy[tiab] OR behavioural therapies[tiab] OR CBT[tiab] OR cognitive therapy[tiab] OR cognitive therapies[tiab] OR group therapy[tiab] OR interpersonal therapy[tiab] OR interpersonal therapies[tiab] OR mindfulness[tiab] OR psycho-therapy[tiab] OR psycho-therapies[tiab] OR psychodynamic therapy[tiab] OR psychodynamic therapies[tiab] OR psychological therapy[tiab] OR psychological therapies[tiab] OR psychotherapy[tiab] OR psychotherapies[tiab] OR talk therapy[tiab])

#4 Search ("Convalescence"[Mesh] OR "Disease-Free Survival"[Mesh] OR "Recovery of Function"[Mesh] OR "Remission Induction"[Mesh:NoExp] recover[tiab] OR recovers[tiab] OR recovered[tiab] OR recovery[tiab] OR remission[tiab] OR (successful[tiab] AND (treatment[tiab] OR treatments[tiab] OR therapy[tiab] OR therapies[tiab])))

#5 Search #1 AND #2 AND #3 AND #4

#6 Search editorial[pt] OR comment[pt] OR letter[pt] OR newspaper article[pt]

#7 Search #5 NOT #6

#8 Search #7 AND *Systematic review filter*<sup>1</sup>: Publication date from 2007/01/01 to 2017/12/31; English

#9 Search #7 AND *Randomized controlled trial filter*<sup>1</sup>: Publication date from 2007/01/01 to 2017/12/31; English

#10 Search #7 AND *Observational studies filter*<sup>1</sup>: Publication date from 2007/01/01 to 2017/12/31; English

---

<sup>1</sup> Strings attached: CADTH database search filters [Internet]. Ottawa: CADTH; 2016. [cited 2018 Jan 26]. Available from: <https://www.cadth.ca/resources/finding-evidence/>

## Depression Research Priority #: 2

**Priority:** What are the long term physical implications of pharmacotherapy for treating depression?

**Suggested research question (reviewer generated):** Does pharmacotherapy (antidepressants) for patients with diagnosed depression adversely impact long term physiological development?

**Date conducted:** 22 August 2017

**Database:** PubMed via NCBI Entrez (1946- )

**Records Retrieved:** 835

### Strategy:

#1 Search ("Bipolar and Related Disorders"[Mesh] OR "Depression"[Mesh] OR "Depressive Disorder"[Mesh] OR "Mood Disorders"[Mesh:NoExp] OR affective disorder[tiab] OR affective disorders[tiab] OR bipolar[tiab] OR depression[tiab] OR depressive[tiab] OR depressives[tiab] OR manic disorder[tiab] OR manic disorders[tiab] OR mood disorder[tiab] OR mood disorders[tiab])

#2 Search "Antidepressive Agents/adverse effects"[Mesh] OR "Antidepressive Agents/contraindications"[Mesh] OR "Antidepressive Agents/poisoning"[Mesh] OR "Antidepressive Agents/toxicity"[Mesh] OR "Serotonin Syndrome"[Mesh] OR "Serotonin Uptake Inhibitors/adverse effects"[Mesh] OR "Serotonin Uptake Inhibitors/contraindications"[Mesh] OR "Serotonin Uptake Inhibitors/poisoning"[Mesh] OR "Serotonin Uptake Inhibitors/toxicity"[Mesh] OR ("Antidepressive Agents"[Mesh] OR "Serotonin Uptake Inhibitors"[Mesh] OR anti-depressant[tiab] OR anti-depressants[tiab] OR anti-depressive agent[tiab] OR anti-depressive agents[tiab] OR antidepressant[tiab] OR antidepressants[tiab] OR antidepressive agent[tiab] OR antidepressive agents[tiab] OR serotonin reuptake inhibitor[tiab] OR serotonin reuptake inhibitors[tiab] OR SSRI[tiab] OR SSRIs[tiab]) AND ("Abnormalities, Drug-Induced"[Mesh] OR "Drug Recalls"[Mesh] OR "Drug-Related Side Effects and Adverse Reactions"[Mesh:NoExp] OR "Product Surveillance, Postmarketing"[Mesh] OR "Safety-Based Drug Withdrawals"[Mesh] OR adverse[ti] OR ((adverse[tiab] OR harm[tiab] OR harmed[tiab] OR harmful[tiab] OR harms[tiab] OR injurious[tiab] OR serious[tiab] OR toxic[tiab] OR undesirable[tiab]) AND (effect[tiab] OR effects[tiab] OR event[tiab] OR events[tiab] OR outcome[tiab] OR outcomes[tiab] OR incident[tiab] OR incidents[tiab] OR reaction[tiab] OR reactions[tiab])) OR adversely[ti] OR chemically induced[tiab] OR complication[tiab] OR complications[tiab] OR drug induced[tiab] OR harm[ti] OR harmed[ti] OR harmful[ti] OR harms[ti] OR injurious[ti] OR poison[tiab] OR poisonous[tiab] OR reaction[ti] OR reactions[ti] OR recalled[tiab] OR recall[tiab] OR recalls[tiab] OR risk[tiab] OR risks[tiab] OR safe[tiab] OR safety[tiab] OR side effect[tiab] OR side effects[tiab] OR toxic[tiab] OR toxicities[tiab] OR toxicity[tiab] OR toxicologic[tiab] OR toxicological[tiab] OR toxicologically[tiab] OR toxicology[tiab] OR undesirable[tiab] OR unsafe[tiab] OR warning[tiab] OR warnings[ti] OR withdrawal[tiab] OR withdrawals[tiab] OR withdrawn[tiab]))

#3 Search "Connective Tissue Cells"[Mesh] OR "Growth and Development"[Mesh:NoExp] OR "Growth"[Mesh] OR "Human Development"[Mesh] OR "Musculoskeletal Physiological Phenomena"[Mesh:NoExp] OR "Musculoskeletal Development"[Mesh] OR "Musculoskeletal System"[Mesh] OR bone[tiab] OR bones[tiab] OR cartilage[tiab] OR cell[tiab] OR cells[tiab] OR cellular[tiab] OR ((delay[tiab] OR delays[tiab] OR develop[tiab] OR developed[tiab] OR developing[tiab] OR development[tiab] OR developmental[tiab] OR impair[tiab] OR impaired[tiab] OR impairment[tiab] OR impairments[tiab] OR impairs[tiab]) AND (function[tiab] OR functional[tiab] OR functioning[tiab] OR functions[tiab] OR physical[tiab] OR

physically[tiab] OR physiological[tiab])) OR grow[tiab] OR growth[tiab] OR fiber[tiab] OR fibers[tiab] OR fibre[tiab] OR fibres[tiab] OR ligament[tiab] OR ligaments[tiab] OR muscle[tiab] OR muscles[tiab] OR muscular[tiab] OR musculoskeletal[tiab] OR myogenesis[tiab] OR skeletal[tiab] OR tendon[tiab] OR tendons[tiab] OR tissue[tiab] OR tissues[tiab]

#4 Search #1 AND #2 AND #3

#5 Search editorial[pt] OR comment[pt] OR letter[pt] OR newspaper article[pt]

#6 Search #4 NOT #5

#7 Search #6 AND *Systematic review filter*. Publication date from 2007/01/01 to 2017/12/31; English

#8 Search #6 AND *Randomized controlled trial filter*. Publication date from 2007/01/01 to 2017/12/31; English

#9 Search #6 AND *Observational studies filter*. Publication date from 2007/01/01 to 2017/12/31; English

**Depression Research Priority #: 3a**

**Priority:** For various treatment options (eg. psychotherapy, individual vs. group psychotherapy and psychosocial support), what are the advantages in terms of cost?

**Suggested question (reviewer generated):** How cost-effective are psychological therapies for depression?

**Date conducted:** 25 August 2017

**Database:** PubMed via NCBI Entrez (1946- )

**Records Retrieved:** 615

**Strategy:**

#1 Search ("Bipolar and Related Disorders"[Mesh] OR "Depression"[Mesh] OR "Depressive Disorder"[Mesh] OR "Mood Disorders"[Mesh:NoExp] OR affective disorder[tiab] OR affective disorders[tiab] OR bipolar[tiab] OR depression[tiab] OR depressive[tiab] OR depressives[tiab] OR manic disorder[tiab] OR manic disorders[tiab] OR mood disorder[tiab] OR mood disorders[tiab])

#2 Search ("Psychotherapy"[Mesh] OR behavioral therapy[tiab] OR behavioral therapies[tiab] OR behavioural therapy[tiab] OR behavioural therapies[tiab] OR CBT[tiab] OR cognitive therapy[tiab] OR cognitive therapies[tiab] OR group therapy[tiab] OR interpersonal therapy[tiab] OR interpersonal therapies[tiab] OR mindfulness[tiab] OR psycho-therapy[tiab] OR psycho-therapies[tiab] OR psychodynamic therapy[tiab] OR psychodynamic therapies[tiab] OR psychological therapy[tiab] OR psychological therapies[tiab] OR psychotherapy[tiab] OR psychotherapies[tiab] OR talk therapy[tiab])

#3 Search #1 AND #2

#4 Search #3 AND *Economics filter*

#5 Search editorial[pt] OR comment[pt] OR letter[pt] OR newspaper article[pt]

#6 Search #4 NOT #5

#7 Search #6 AND *Systematic review filter*. Publication date from 2007/01/01 to 2017/12/31; English

#8 Search #6 AND *Randomized controlled trial filter*. Publication date from 2007/01/01 to 2017/12/31; English

#9 Search #6 AND *Observational studies filter*. Publication date from 2007/01/01 to 2017/12/31; English

**Depression Research Priority #: 3b**

**Priority:** For various treatment options (eg. psychotherapy, individual vs. group psychotherapy and psychosocial support), what are the advantages in terms of safety?

**Suggested question (reviewer generated):** What are the harms associated with psychological therapies for depression?

**Date conducted:** 29 August 2017

**Database:** PubMed via NCBI Entrez (1946- )

**Records Retrieved:** 964

**Strategy:**

#1 Search "Bipolar and Related Disorders"[Mesh] OR "Depression"[Mesh] OR "Depressive Disorder"[Mesh] OR "Mood Disorders"[Mesh:NoExp] OR affective disorder[tiab] OR affective disorders[tiab] OR bipolar[tiab] OR depression[tiab] OR depressive[tiab] OR depressives[tiab] OR manic disorder[tiab] OR manic disorders[tiab] OR mood disorder[tiab] OR mood disorders[tiab]

#2 Search "Psychotherapy/adverse effects"[Mesh] OR (("Psychotherapy"[Majr] OR behavioral therapy[ti] OR behavioral therapies[ti] OR behavioural therapy[ti] OR behavioural therapies[ti] OR CBT[ti] OR cognitive therapy[ti] OR cognitive therapies[ti] OR group therapy[ti] OR interpersonal therapy[ti] OR interpersonal therapies[ti] OR mindfulness[ti] OR psychotherapy[ti] OR psycho-therapies[ti] OR psychodynamic therapy[ti] OR psychodynamic therapies[ti] OR psychological therapy[ti] OR psychological therapies[ti] OR psychotherapy[ti] OR psychotherapies[ti] OR talk therapy[ti]) AND ("Patient Harm"[Mesh] OR adverse[ti] OR ((adverse[tiab] OR harm[tiab] OR harmed[tiab] OR harmful[tiab] OR harms[tiab] OR injurious[tiab] OR negative[tiab] OR serious[tiab] OR undesirable[tiab]) AND (effect[tiab] OR effects[tiab] OR event[tiab] OR events[tiab] OR outcome[tiab] OR outcomes[tiab] OR incident[tiab] OR incidents[tiab] OR response[tiab] OR responses[tiab]))) OR adversely[ti] OR drop out[ti] OR drop outs[ti] OR dropout[ti] OR dropouts[ti] OR harm[ti] OR harmed[ti] OR harmful[ti] OR harms[ti] OR injurious[ti] OR risk[ti] OR risks[ti] OR safe[ti] OR safety[ti] OR undesirable[ti] OR unsafe[ti] OR warning[ti] OR warnings[ti]))

#3 Search #1 AND #2

#4 Search editorial[pt] OR comment[pt] OR letter[pt] OR newspaper article[pt]

#5 Search #3 NOT #4

#6 Search #5 AND *Systematic review filter*: Publication date from 2007/01/01 to 2017/12/31; English

#7 Search #5 AND *Randomized controlled trial filter*: Publication date from 2007/01/01 to 2017/12/31; English

#8 Search #5 AND *Observational studies filter*: Publication date from 2007/01/01 to 2017/12/31; English

**Depression Research Priority #: 3c**

**Priority:** For various treatment options (eg. Psychotherapy, individual vs. group psychotherapy and psychosocial support), what are the advantages in terms of effectiveness and relapse prevention?

**Suggested question (reviewer generated):** How effective are psychological therapies for depression?

**Date conducted:** 7 September 2017

**Database:** PubMed via NCBI Entrez (1946- )

**Records Retrieved:** 1589

**Strategy:**

#1 Search "Bipolar and Related Disorders"[Mesh] OR "Depression"[Mesh] OR "Depressive Disorder"[Mesh] OR "Mood Disorders"[Mesh:NoExp] OR affective disorder[tiab] OR affective disorders[tiab] OR bipolar[tiab] OR depression[tiab] OR depressive[tiab] OR depressives[tiab] OR manic disorder[tiab] OR manic disorders[tiab] OR mood disorder[tiab] OR mood disorders[tiab]

#2 Search ("Psychotherapy"[Mesh] OR behavioral therapy[tiab] OR behavioral therapies[tiab] OR behavioural therapy[tiab] OR behavioural therapies[tiab] OR CBT[tiab] OR cognitive therapy[tiab] OR cognitive therapies[tiab] OR group therapy[tiab] OR interpersonal therapy[tiab] OR interpersonal therapies[tiab] OR mindfulness[tiab] OR psycho-therapy[tiab] OR psycho-therapies[tiab] OR psychodynamic therapy[tiab] OR psychodynamic therapies[tiab] OR psychological therapy[tiab] OR psychological therapies[tiab] OR psychotherapy[tiab] OR psychotherapies[tiab] OR talk therapy[tiab])

#3 Search #1 AND #2

#4 Search editorial[pt] OR comment[pt] OR letter[pt] OR newspaper article[pt]

#5 Search #3 NOT #4

#6 Search #5 AND *Systematic review filter*. Publication date from 2007/01/01 to 2017/12/31; English

**Depression Research Priority #: 4**

**Priority:** What are the prevention strategies/tactics for reducing self-harm and suicide in children, youth and adults with depression?

**Suggested question (reviewer generated):** What are effective suicide and self-harm prevention interventions for patients with diagnosed depression?

**Date conducted:** 26 September 2017

**Database:** PubMed via NCBI Entrez (1946- )

**Records Retrieved:** 254

**Strategy:**

#1 Search "Bipolar and Related Disorders"[Mesh] OR "Depression"[Mesh] OR "Depressive Disorder"[Mesh] OR "Mood Disorders"[Mesh:NoExp] OR affective disorder[tiab] OR affective disorders[tiab] OR bipolar[tiab] OR depression[tiab] OR depressive[tiab] OR depressives[tiab] OR manic disorder[tiab] OR manic disorders[tiab] OR mood disorder[tiab] OR mood disorders[tiab]

#2 Search "Self-Injurious Behavior/prevention and control"[Mesh:NoExp] OR "Self Mutilation/prevention and control"[Mesh] OR "Suicide/prevention and control"[Mesh:NoExp] OR "Suicide, Attempted/prevention and control"[Mesh] OR ((self harm[tiab] OR self injurious[tiab] OR self injury[tiab] OR suicidal[tiab] OR suicide[tiab] OR suicides[tiab]) AND (deter[tiab] OR detered[tiab] OR deterrence[tiab] OR prevent[tiab] OR prevented[tiab] OR prevention[tiab] OR prevents[tiab] OR reduce[tiab] OR reduced[tiab] OR reduces[tiab] OR reduction[tiab] OR reductions[tiab]))

#3 Search #1 AND #2

#4 Search editorial[pt] OR comment[pt] OR letter[pt] OR newspaper article[pt]

#5 Search #3 NOT #4

#6 Search #5 AND *Systematic review filter*. Publication date from 2007/01/01 to 2017/12/31; English



**Depression Research Priority #: 7****Priority:** Can diet or exercise affect the development of depression?**Suggested question (reviewer generated):** For patients with diagnosed depression, are diet or exercise comparatively effective as pharmacotherapy (antidepressants) for managing symptoms and improving patient quality of life?**Date conducted:** 1 August 2017**Database:** PubMed via NCBI Entrez (1946- )**Records Retrieved:** 265**Strategy:**

#1 Search "Bipolar and Related Disorders"[Mesh] OR "Depression"[Mesh] OR "Depressive Disorder"[Mesh] OR "Mood Disorders"[Mesh:NoExp] OR affective disorder[tiab] OR affective disorders[tiab] OR bipolar[tiab] OR depression[tiab] OR depressive[tiab] OR depressives[tiab] OR manic disorder[tiab] OR manic disorders[tiab] OR mood disorder[tiab] OR mood disorders[tiab]

#2 Search "Bipolar and Related Disorders/diet therapy"[Majr] OR "Depression/diet therapy"[Majr] OR "Depressive Disorder/diet therapy"[Majr] OR "Diet Therapy"[Mesh] OR "Exercise"[Mesh] OR "Exercise Movement Techniques"[Mesh] OR "Exercise Therapy"[Mesh] OR "Mood Disorders/diet therapy"[Majr:NoExp] OR "Physical Fitness"[Mesh] OR diet[ti] OR dietary[ti] OR exercise[ti] OR physical activity[ti] OR physical therapy[ti]

#3 Search "Adrenergic Uptake Inhibitors"[Mesh] OR "Antidepressive Agents"[Mesh] OR "Bipolar and Related Disorders/drug therapy"[Mesh] OR "Depression/drug therapy"[Mesh] OR "Depressive Disorder/drug therapy"[Mesh] OR Fluvoxamine[Mesh] OR "Monoamine Oxidase Inhibitors"[Mesh] OR "Mood Disorders/drug therapy"[Mesh:NoExp] OR "Serotonin and Noradrenaline Reuptake Inhibitors"[Mesh] OR "Serotonin Uptake Inhibitors"[Mesh] OR anti-depressant[tiab] OR anti-depressants[tiab] OR anti-depressive agent[tiab] OR anti-depressive agents[tiab] OR antidepressant[tiab] OR antidepressants[tiab] OR antidepressive agent[tiab] OR antidepressive agents[tiab] OR fluvoxamine[tiab] OR MAOIs[tiab] OR monoamine oxidase inhibitors[tiab] OR serotonin reuptake inhibitor[tiab] OR serotonin reuptake inhibitors[tiab] OR SNRI[tiab] OR SNRIs[tiab] OR SSRI[tiab] OR SSRIs[tiab]

#4 Search #1 AND #2 AND #3

#5 Search editorial[pt] OR comment[pt] OR letter[pt] OR newspaper article[pt]

#6 Search #4 NOT #5

#7 Search #6 AND *Systematic review filter*: Publication date from 2007/01/01 to 2017/12/31; English

#8 Search #6 AND *Randomized controlled trial filter*: Publication date from 2007/01/01 to 2017/12/31; English

#9 Search #6 AND *Observational studies filter*: Publication date from 2007/01/01 to 2017/12/31; English

## Depression Research Priority #: 8

**Priority:** What are the functional, social, intellectual, physical and psychological problems experience by children and teens living with an immediate family member who has depression?

**Suggested question (reviewer generated):** For children and adolescents, what are the harms associated with living with a family member with diagnosed depression?

**Date conducted:** 5 August 2017

**Database:** PubMed via NCBI Entrez (1946- )

**Records Retrieved:** 2654

### Strategy:

#1 Search "Bipolar and Related Disorders"[Mesh] OR "Depression"[Mesh] OR "Depressive Disorder"[Mesh] OR "Mood Disorders"[Mesh:NoExp] OR affective disorder[tiab] OR affective disorders[tiab] OR bipolar[tiab] OR depression[tiab] OR depressive[tiab] OR depressives[tiab] OR manic disorder[tiab] OR manic disorders[tiab] OR mood disorder[tiab] OR mood disorders[tiab]

#2 Search "Adolescent"[Mesh] OR "Child"[Mesh] OR "Minors"[Mesh] OR adolescence[tiab] OR adolescent[tiab] OR adolescents[tiab] OR child[tiab] OR childhood[tiab] OR children[tiab] OR childrens[tiab] OR childs[tiab] OR preschooler[tiab] OR preschoolers[tiab] OR teen[tiab] OR teenaged[tiab] OR teenager[tiab] OR teenagers[tiab] OR teens[tiab] OR toddler[tiab] OR toddlers[tiab] OR youth[tiab] OR youths[tiab]

#3 Search "Family Relations"[Majr] OR family member[ti] OR family members[ti] OR father[ti] OR fathers[ti] OR grandparent[ti] OR grandparents[ti] OR mother[ti] OR mothers[tiab] OR parent[ti] OR parents[ti] OR relative[ti] OR relatives[ti] OR sibling[ti] OR siblings[ti]

#4 Search abuse[tiab] OR abused[tiab] OR abuses[tiab] OR abusing[tiab] OR challenge[tiab] OR challenges[tiab] OR challenging[tiab] OR damage[tiab] OR damaged[tiab] OR damages[tiab] OR damaging[tiab] OR experience[tiab] OR experienced[tiab] OR experiences[tiab] OR experiencing[tiab] OR expose[tiab] OR exposed[tiab] OR exposes[tiab] OR exposing[tiab] OR exposure[tiab] OR issue[tiab] OR issues[tiab] OR harm[tiab] OR harmed[tiab] OR harmful[tiab] OR harming[tiab] OR harms[tiab] OR hurt[tiab] OR hurting[tiab] OR hurts[tiab] OR impact[tiab] OR impacted[tiab] OR impacting[tiab] OR impacts[tiab] OR maltreatment[tiab] OR mistreat[tiab] OR mistreated[tiab] OR mistreating[tiab] OR mistreatment[tiab] OR mistreats[tiab] OR neglect[tiab] OR neglected[tiab] OR neglecting[tiab] OR neglects[tiab] OR problem[tiab] OR problems[tiab] OR risk[tiab] OR risked[tiab] OR risking[tiab] OR risks[tiab] OR risktaking[tiab]

#5 Search #1 AND #2 AND #3 AND #4

#6 Search editorial[pt] OR comment[pt] OR letter[pt] OR newspaper article[pt]

#7 Search #5 NOT #6

#8 Search #7 AND *Systematic review filter*: Publication date from 2007/01/01 to 2017/12/31; English

#9 Search #7 AND *Randomized controlled trial filter*: Publication date from 2007/01/01 to 2017/12/31; English

#10 Search #7 AND *Observational studies filter*. Publication date from 2007/01/01 to 2017/12/31; English

**Depression Research Priority #: 9**

**Priority:** What interventions are effective in supporting employees with depression and reducing stigma associated with depression in the workplace?

**Suggested question (reviewer generated):** What interventions are effective in supporting employees with depression and reducing stigma associated with depression in the workplace?

**Date conducted:** 12 October 2017

**Database:** PubMed via NCBI Entrez (1946- )

**Records Retrieved:** 1571

**Strategy:**

#1 Search "Bipolar and Related Disorders"[Mesh] OR "Depression"[Mesh] OR "Depressive Disorder"[Mesh] OR "Mood Disorders"[Mesh:NoExp] OR affective disorder[tiab] OR affective disorders[tiab] OR bipolar[tiab] OR depression[tiab] OR depressive[tiab] OR depressives[tiab] OR manic disorder[tiab] OR manic disorders[tiab] OR mood disorder[tiab] OR mood disorders[tiab]

#2 Search ("Occupational Health"[Majr] OR "Workplace"[Mesh] OR employee[tiab] OR employees[tiab] OR employer[tiab] OR employers[tiab] OR job site[tiab] OR job sites[tiab] OR occupational health[ti] OR staff[tiab] OR worker[tiab] OR workers[tiab] OR work place[tiab] OR work places[tiab] OR workplace[tiab] OR workplaces[tiab]) AND ("Health Education"[Mesh:NoExp] OR "Health Policy"[Mesh] OR "Health Promotion"[Mesh] OR "Occupational Health Services"[Mesh] OR "Program Evaluation"[Mesh] OR "Sensitivity Training Groups"[Mesh] OR "Social Stigma"[Mesh] OR "Staff Development"[Mesh] OR course[tiab] OR courses[tiab] OR education[tiab] OR educational[tiab] OR intervention[tiab] OR interventions[tiab] OR policies[tiab] OR policy[tiab] OR program[tiab] OR programme[tiab] OR programmes[tiab] OR programming[tiab] OR programs[tiab] OR stigma[tiab] OR stigmatized[tiab] OR training[tiab])

#3 Search #1 AND #2

#4 Search editorial[pt] OR comment[pt] OR letter[pt] OR newspaper article[pt]

#5 Search #3 NOT #4

#6 Search #5 AND *Systematic review filter*: Publication date from 2007/01/01 to 2017/12/31; English

#7 Search #5 AND *Randomized controlled trial filter*: Publication date from 2007/01/01 to 2017/12/31; English

#8 Search #5 AND *Observational studies filter*: Publication date from 2007/01/01 to 2017/12/31; English

**Depression Research Priority #: 10**

**Priority:** Are there structural or functional changes in brains due to antidepressant therapy during brain development?

**Suggested question (reviewer generated):** Does antidepressant therapy result in neurodevelopmental delays or neurological harms in children and adolescents?

**Date conducted:** 4 July 2017

**Database:** PubMed via NCBI Entrez (1946- )

**Records Retrieved:** 731

**Strategy:**

#1 Search ("Antidepressive Agents/adverse effects"[Mesh] OR "Antidepressive Agents/contraindications"[Mesh] OR "Antidepressive Agents/poisoning"[Mesh] OR "Antidepressive Agents/toxicity"[Mesh] OR "Serotonin Syndrome"[Mesh] OR "Serotonin Uptake Inhibitors/adverse effects"[Mesh] OR "Serotonin Uptake Inhibitors/contraindications"[Mesh] OR "Serotonin Uptake Inhibitors/poisoning"[Mesh] OR "Serotonin Uptake Inhibitors/toxicity"[Mesh]) OR (("Antidepressive Agents"[Mesh] OR "Serotonin Uptake Inhibitors"[Mesh] OR anti-depressant\*[tiab] OR antidepressant\*[tiab] OR antidepressant agent\*[tiab] OR serotonin reuptake inhibitor\*[tiab] OR SSRI\*[tiab]) AND ("Abnormalities, Drug-Induced"[MeSH] OR "Drug Recalls"[MeSH] OR "Drug-Related Side Effects and Adverse Reactions"[MeSH:noexp] OR "Product Surveillance, Postmarketing"[MeSH] OR "Psychoses, Substance-Induced"[MeSH:noexp] OR "Safety-Based Drug Withdrawals"[MeSH] OR adverse[ti] OR ((adverse[tiab] OR harm[tiab] OR harmed[tiab] OR harmful[tiab] OR harms[tiab] OR injurious[tiab] OR serious[tiab] OR toxic[tiab] OR undesirable[tiab]) AND (effect\*[tiab] OR event\*[tiab] OR outcome\*[tiab] OR incident\*[tiab] OR reaction\*[tiab])) OR adversely[ti] OR chemically induced[tiab] OR complication\*[ti] OR drug induced[tiab] OR harm[ti] OR harms[ti] OR injurious[ti] OR poison\*[ti] OR reaction\*[ti] OR recall\*[ti] OR risk[ti] OR risks[ti] OR safe[ti] OR safety[tiab] OR side effect\*[tiab] OR toxic[tiab] OR toxicit\*[tiab] OR toxicologic\*[tiab] OR undesirable[ti] OR unsafe[tiab] OR warning\*[ti] OR withdrawal\*[ti] OR withdrawn\*[ti]))

#2 Search ("Adolescent Development"[Mesh] OR "Child Development"[Mesh] OR "Neurodevelopmental Disorders"[Mesh] OR "Neurodevelopmental Disorders "[Mesh] OR autism[tiab] OR autistic[tiab] OR ASD[tiab] OR brain[tiab] OR cognitive[tiab] OR delay[tiab] OR delays[tiab] OR develop[tiab] OR developed[tiab] OR developing[tiab] OR development[tiab] OR developmental[tiab] OR disabilities[tiab] OR disability[tiab] OR disorder[tiab] OR disorders[tiab] OR grow[tiab] OR growth[tiab] OR impair[tiab] OR impaired[tiab] OR impede[tiab] OR impeded[tiab] OR impedes[tiab] OR intellectual[tiab] OR intellectually[tiab] OR learn[tiab] OR learns[tiab] OR learning[tiab] OR mental[tiab] OR mentally[tiab] OR neurodevelopmental[tiab] OR neurological[tiab])

#3 Search "Adolescent"[Mesh] OR "Child"[Mesh] OR "Minors"[Mesh] OR adolescence[tiab] OR adolescent[tiab] OR adolescents[tiab] OR child[tiab] OR childhood[tiab] OR children[tiab] OR childrens[tiab] OR childs[tiab] OR preschooler[tiab] OR preschoolers[tiab] OR teen[tiab] OR teenaged[tiab] OR teenager[tiab] OR teenagers[tiab] OR teens[tiab] OR toddler[tiab] OR toddlers[tiab] OR youth[tiab] OR youths[tiab]

#4 Search #1 AND #2 AND #3

#5 Search ("Maternal Exposure"[Mesh] OR Pregnancy[Majr] OR "Prenatal Injuries"[Mesh] OR antenatal[ti] OR embryo[ti] OR embryos[ti] OR embryonic[ti] OR fetal[ti] OR fetus[ti] OR

fetuses[ti] OR gestational[ti] OR maternal[ti] OR pregnancies[ti] OR pregnancy[ti] OR pregnant[ti] OR prenatal[ti] OR prenataally[ti] OR utero[ti])

#6 Search #4 NOT #5: Publication date from 2007/01/01 to 2017/12/31; English

## Depression Research Priority #: 11

**Priority:** What is the role of the family in the treatment and trajectory of depression?

**Suggested question (reviewer generated):** For patients with diagnosed depression, does family involvement in patients' lives decrease the progression or severity of depression symptoms, influence treatment decisions, or impact remission rates?

**Date conducted:** 2 October 2017

**Database:** PubMed via NCBI Entrez (1946- )

**Records Retrieved:** 4689

### Strategy:

#1 Search "Bipolar and Related Disorders"[Mesh] OR "Depression"[Mesh] OR "Depressive Disorder"[Mesh] OR "Mood Disorders"[Mesh:NoExp] OR affective disorder[tiab] OR affective disorders[tiab] OR bipolar[tiab] OR depression[tiab] OR depressive[tiab] OR depressives[tiab] OR manic disorder[tiab] OR manic disorders[tiab] OR mood disorder[tiab] OR mood disorders[tiab]

#2 Search ("Family"[Majr] OR (children[ti] AND (families[tiab] OR family[tiab] OR father[tiab] OR fathers[tiab] OR mother[tiab] OR mothers[tiab] OR parent[tiab] OR parents[tiab])) OR familial[ti] OR families[ti] OR family[ti] OR fathers[ti] OR grandparent[ti] OR grandparents[ti] OR kin[ti] OR kinship[ti] OR maternal[ti] OR mothers[ti] OR offspring[ti] OR parent[ti] OR parental[ti] OR parents[ti] OR paternal[ti] OR sibling[ti] OR siblings[ti] OR spousal[ti] OR spouse[ti] OR spouses[ti])

#3 Search ("Convalescence"[Mesh] OR "Decision Making"[Mesh] OR "Disease Progression"[Mesh] OR "Disease-Free Survival"[Mesh] OR "Health Status Indicators"[Mesh] OR "Patient Participation"[Mesh] OR "Recovery of Function"[Mesh] OR "Remission Induction"[Mesh:NoExp] OR "Treatment Outcome"[Mesh] OR decide[tiab] OR decided[tiab] OR decides[tiab] OR decision[tiab] OR decisions[tiab] OR engage[tiab] OR engaged[tiab] OR engagement[tiab] OR engaging[tiab] OR involve[tiab] OR involved[tiab] OR involvement[tiab] OR involves[tiab] OR involving[tiab] OR ((outcome[tiab] OR outcomes[tiab]) AND (patient[tiab] OR patients[tiab] OR therapeutic[tiab] OR therapy[tiab] OR therapies[tiab] OR treatment[tiab])) OR participate[tiab] OR participates[tiab] OR participation[tiab] OR progress[tiab] OR progression[tiab] OR recover[tiab] OR recovers[tiab] OR recovered[tiab] OR recovery[tiab] OR remission[tiab] OR severe[tiab] OR severity[tiab] OR (successful[tiab] AND (therapy[tiab] OR therapies[tiab] OR treatment[tiab] OR treatments[tiab])) OR symptom[tiab] OR symptoms[tiab])

#4 Search #1 AND #2 AND #3

#5 Search editorial[pt] OR comment[pt] OR letter[pt] OR newspaper article[pt]

#6 Search #4 NOT #5

#7 Search #6 AND *Systematic review filter*. Publication date from 2007/01/01 to 2017/12/31; English

#8 Search #6 AND *Randomized controlled trial filter*. Publication date from 2007/01/01 to 2017/12/31; English

#9 Search #8 AND *Observational studies filter*. Publication date from 2007/01/01 to 2017/12/31; English
